# Supplementary material for: Keratinocyte-derived small extracellular vesicles supply antigens for CD1a-resticted T cells and promote their type 2 bias in the context of filaggrin insufficiency
Source: Front Immunol. 2024 Mar 22;15:1369238. doi: 10.3389/fimmu.2024.1369238 (PMC10995404; doi:10.3389/fimmu.2024.1369238)
Supplement: Supplementary file 5 [file Table_4.xlsx]

## Sheet: Legend
Table S4. Gene Ontology and Reactome analysis of the genes differentially expressed in AD skin which have relevance to the proteins identified in the sEV/exosomal compartment by FunRich.

## Sheet: GO Biological process
GO biological process complete	Homo sapiens - REFLIST (20595)	upload_1 (327)	upload_1 (expected)	upload_1 (over/under)	upload_1 (fold Enrichment)	upload_1 (raw P-value)	upload_1 (FDR)
neutrophil activation involved in immune response (GO:0002283)	488	49	7.75	+	6.32	1.18E-23	9.35E-20	FDR < 0.05
neutrophil activation (GO:0042119)	498	49	7.91	+	6.20	2.67E-23	1.05E-19
neutrophil degranulation (GO:0043312)	482	49	7.65	+	6.40	7.20E-24	1.14E-19
granulocyte activation (GO:0036230)	503	49	7.99	+	6.14	3.98E-23	1.26E-19
neutrophil mediated immunity (GO:0002446)	497	49	7.89	+	6.21	2.46E-23	1.30E-19
leukocyte degranulation (GO:0043299)	507	49	8.05	+	6.09	5.46E-23	1.44E-19
regulated exocytosis (GO:0045055)	697	56	11.07	+	5.06	1.30E-22	2.56E-19
small molecule metabolic process (GO:0044281)	1622	85	25.75	+	3.30	1.83E-22	2.64E-19
exocytosis (GO:0006887)	785	59	12.46	+	4.73	1.81E-22	2.87E-19
establishment of localization in cell (GO:0051649)	2335	104	37.07	+	2.81	1.29E-22	2.90E-19
myeloid leukocyte mediated immunity (GO:0002444)	522	49	8.29	+	5.91	1.74E-22	3.06E-19
myeloid cell activation involved in immune response (GO:0002275)	528	49	8.38	+	5.84	2.75E-22	3.62E-19
cellular localization (GO:0051641)	2985	116	47.39	+	2.45	9.04E-21	1.10E-17
leukocyte activation involved in immune response (GO:0002366)	635	51	10.08	+	5.06	1.30E-20	1.47E-17
cell activation involved in immune response (GO:0002263)	639	51	10.15	+	5.03	1.68E-20	1.77E-17
myeloid leukocyte activation (GO:0002274)	590	49	9.37	+	5.23	2.19E-20	2.16E-17
cell activation (GO:0001775)	1089	65	17.29	+	3.76	9.58E-20	8.90E-17
export from cell (GO:0140352)	982	61	15.59	+	3.91	2.53E-19	2.22E-16
secretion by cell (GO:0032940)	932	59	14.80	+	3.99	4.64E-19	3.86E-16
localization (GO:0051179)	5831	170	92.58	+	1.84	5.77E-19	4.56E-16
leukocyte activation (GO:0045321)	939	59	14.91	+	3.96	6.49E-19	4.88E-16
establishment of localization (GO:0051234)	4631	147	73.53	+	2.00	7.15E-19	5.14E-16
secretion (GO:0046903)	1047	62	16.62	+	3.73	1.14E-18	7.82E-16
transport (GO:0006810)	4476	143	71.07	+	2.01	1.76E-18	1.16E-15
vesicle-mediated transport (GO:0016192)	1969	84	31.26	+	2.69	7.39E-17	4.67E-14
leukocyte mediated immunity (GO:0002443)	764	50	12.13	+	4.12	9.38E-17	5.70E-14
oxoacid metabolic process (GO:0043436)	866	52	13.75	+	3.78	6.14E-16	3.60E-13
immune effector process (GO:0002252)	939	54	14.91	+	3.62	8.81E-16	4.97E-13
cellular process (GO:0009987)	15495	302	246.02	+	1.23	2.15E-15	1.17E-12
carboxylic acid metabolic process (GO:0019752)	833	50	13.23	+	3.78	2.44E-15	1.24E-12
organic acid metabolic process (GO:0006082)	897	52	14.24	+	3.65	2.39E-15	1.26E-12
response to organic substance (GO:0010033)	3008	105	47.76	+	2.20	2.65E-15	1.31E-12
response to chemical (GO:0042221)	4381	133	69.56	+	1.91	5.03E-15	2.41E-12
small molecule catabolic process (GO:0044282)	406	32	6.45	+	4.96	4.91E-13	2.28E-10
small molecule biosynthetic process (GO:0044283)	530	36	8.42	+	4.28	9.82E-13	4.44E-10
monosaccharide biosynthetic process (GO:0046364)	53	14	.84	+	16.64	1.83E-12	8.02E-10
biological_process (GO:0008150)	17851	320	283.43	+	1.13	2.23E-12	9.29E-10
Unclassified (UNCLASSIFIED)	2744	7	43.57	-	.16	2.23E-12	9.54E-10
response to stimulus (GO:0050896)	8540	198	135.60	+	1.46	6.92E-12	2.81E-09
glucose metabolic process (GO:0006006)	114	17	1.81	+	9.39	2.45E-11	9.69E-09
immune system process (GO:0002376)	2903	93	46.09	+	2.02	2.71E-11	1.05E-08
catabolic process (GO:0009056)	2096	75	33.28	+	2.25	2.87E-11	1.08E-08
organic substance catabolic process (GO:1901575)	1769	66	28.09	+	2.35	1.43E-10	5.26E-08
response to oxygen-containing compound (GO:1901700)	1604	62	25.47	+	2.43	1.50E-10	5.38E-08
regulation of localization (GO:0032879)	2753	88	43.71	+	2.01	1.59E-10	5.57E-08
metabolic process (GO:0008152)	8313	190	131.99	+	1.44	1.98E-10	6.65E-08
organic hydroxy compound metabolic process (GO:1901615)	488	31	7.75	+	4.00	1.96E-10	6.72E-08
hexose metabolic process (GO:0019318)	156	18	2.48	+	7.27	2.88E-10	9.30E-08
carbohydrate derivative metabolic process (GO:1901135)	1008	46	16.00	+	2.87	2.84E-10	9.35E-08
monosaccharide metabolic process (GO:0005996)	181	19	2.87	+	6.61	3.97E-10	1.26E-07
immune response (GO:0006955)	2075	71	32.95	+	2.16	9.42E-10	2.86E-07
regulation of biological quality (GO:0065008)	3995	111	63.43	+	1.75	9.39E-10	2.91E-07
regulation of cellular protein localization (GO:1903827)	561	32	8.91	+	3.59	1.24E-09	3.70E-07
cellular response to chemical stimulus (GO:0070887)	2914	89	46.27	+	1.92	1.29E-09	3.78E-07
organonitrogen compound metabolic process (GO:1901564)	5246	134	83.29	+	1.61	1.37E-09	3.86E-07
hexose biosynthetic process (GO:0019319)	47	11	.75	+	14.74	1.36E-09	3.91E-07
carboxylic acid catabolic process (GO:0046395)	224	20	3.56	+	5.62	1.85E-09	5.13E-07
carbohydrate metabolic process (GO:0005975)	476	29	7.56	+	3.84	1.91E-09	5.20E-07
positive regulation of cellular protein localization (GO:1903829)	306	23	4.86	+	4.73	2.47E-09	6.50E-07
response to endogenous stimulus (GO:0009719)	1426	55	22.64	+	2.43	2.45E-09	6.57E-07
organophosphate metabolic process (GO:0019637)	894	41	14.19	+	2.89	2.56E-09	6.65E-07
biosynthetic process (GO:0009058)	2865	87	45.49	+	1.91	2.74E-09	6.98E-07
monocarboxylic acid metabolic process (GO:0032787)	517	30	8.21	+	3.65	2.89E-09	7.26E-07
organic substance metabolic process (GO:0071704)	7840	178	124.48	+	1.43	3.65E-09	9.02E-07
organic acid catabolic process (GO:0016054)	239	20	3.79	+	5.27	5.18E-09	1.26E-06
positive regulation of protein localization to cell periphery (GO:1904377)	70	12	1.11	+	10.80	5.41E-09	1.30E-06
developmental process (GO:0032502)	5797	142	92.04	+	1.54	6.41E-09	1.51E-06
response to toxic substance (GO:0009636)	244	20	3.87	+	5.16	7.18E-09	1.67E-06
viral process (GO:0016032)	444	27	7.05	+	3.83	7.34E-09	1.68E-06
response to organonitrogen compound (GO:0010243)	1014	43	16.10	+	2.67	9.37E-09	2.12E-06
gluconeogenesis (GO:0006094)	44	10	.70	+	14.31	9.87E-09	2.17E-06
localization within membrane (GO:0051668)	615	32	9.76	+	3.28	1.02E-08	2.17E-06
primary metabolic process (GO:0044238)	7352	168	116.73	+	1.44	9.78E-09	2.18E-06
nucleobase-containing small molecule metabolic process (GO:0055086)	515	29	8.18	+	3.55	1.01E-08	2.19E-06
alcohol metabolic process (GO:0006066)	335	23	5.32	+	4.32	1.22E-08	2.54E-06
organic substance transport (GO:0071702)	2079	68	33.01	+	2.06	1.21E-08	2.54E-06
carbohydrate biosynthetic process (GO:0016051)	136	15	2.16	+	6.95	1.56E-08	3.21E-06
establishment of protein localization to endoplasmic reticulum (GO:0072599)	116	14	1.84	+	7.60	1.68E-08	3.41E-06
supramolecular fiber organization (GO:0097435)	601	31	9.54	+	3.25	2.12E-08	4.24E-06
organonitrogen compound biosynthetic process (GO:1901566)	1379	51	21.90	+	2.33	2.84E-08	5.61E-06
protein localization to membrane (GO:0072657)	542	29	8.61	+	3.37	2.93E-08	5.64E-06
protein localization to endoplasmic reticulum (GO:0070972)	143	15	2.27	+	6.61	2.89E-08	5.64E-06
purine-containing compound metabolic process (GO:0072521)	354	23	5.62	+	4.09	3.18E-08	6.06E-06
regulation of transport (GO:0051049)	1772	60	28.14	+	2.13	3.26E-08	6.13E-06
organic substance biosynthetic process (GO:1901576)	2803	82	44.51	+	1.84	4.04E-08	7.52E-06
response to nitrogen compound (GO:1901698)	1101	44	17.48	+	2.52	4.18E-08	7.68E-06
regulation of protein localization to cell periphery (GO:1904375)	127	14	2.02	+	6.94	4.77E-08	8.67E-06
organic hydroxy compound biosynthetic process (GO:1901617)	174	16	2.76	+	5.79	5.45E-08	9.68E-06
regulation of multicellular organismal process (GO:0051239)	2673	79	42.44	+	1.86	5.39E-08	9.68E-06
macromolecule localization (GO:0033036)	2496	75	39.63	+	1.89	6.09E-08	1.07E-05
positive regulation of protein localization to membrane (GO:1905477)	131	14	2.08	+	6.73	6.80E-08	1.18E-05
regulation of protein localization (GO:0032880)	894	38	14.19	+	2.68	6.99E-08	1.20E-05
cellular catabolic process (GO:0044248)	1812	60	28.77	+	2.09	7.58E-08	1.29E-05
ribose phosphate metabolic process (GO:0019693)	343	22	5.45	+	4.04	7.90E-08	1.33E-05
cornification (GO:0070268)	113	13	1.79	+	7.25	9.17E-08	1.53E-05
positive regulation of transport (GO:0051050)	947	39	15.04	+	2.59	1.03E-07	1.69E-05
anatomical structure development (GO:0048856)	5330	129	84.63	+	1.52	1.10E-07	1.79E-05
cellular component organization or biogenesis (GO:0071840)	6006	141	95.36	+	1.48	1.15E-07	1.85E-05
sterol biosynthetic process (GO:0016126)	46	9	.73	+	12.32	1.69E-07	2.69E-05
positive regulation of protein localization to plasma membrane (GO:1903078)	63	10	1.00	+	10.00	1.97E-07	3.05E-05
establishment of protein localization to organelle (GO:0072594)	394	23	6.26	+	3.68	1.97E-07	3.08E-05
regulation of developmental process (GO:0050793)	2461	73	39.07	+	1.87	1.97E-07	3.11E-05
response to hormone (GO:0009725)	819	35	13.00	+	2.69	2.12E-07	3.25E-05
cellular metabolic process (GO:0044237)	7542	166	119.75	+	1.39	2.35E-07	3.54E-05
animal organ development (GO:0048513)	3220	88	51.13	+	1.72	2.34E-07	3.55E-05
protein localization (GO:0008104)	2063	64	32.76	+	1.95	2.61E-07	3.89E-05
cellular response to organic substance (GO:0071310)	2344	70	37.22	+	1.88	2.82E-07	4.17E-05
sulfur compound metabolic process (GO:0006790)	373	22	5.92	+	3.71	3.09E-07	4.53E-05
cellular amino acid metabolic process (GO:0006520)	283	19	4.49	+	4.23	3.22E-07	4.66E-05
regulation of protein localization to membrane (GO:1905475)	201	16	3.19	+	5.01	3.39E-07	4.88E-05
regulation of intracellular protein transport (GO:0033157)	256	18	4.06	+	4.43	3.50E-07	4.99E-05
system development (GO:0048731)	4330	109	68.75	+	1.59	3.57E-07	5.04E-05
positive regulation of developmental process (GO:0051094)	1271	46	20.18	+	2.28	3.90E-07	5.45E-05
purine ribonucleotide metabolic process (GO:0009150)	317	20	5.03	+	3.97	3.98E-07	5.52E-05
organophosphate biosynthetic process (GO:0090407)	552	27	8.76	+	3.08	4.87E-07	6.70E-05
protein targeting to ER (GO:0045047)	112	12	1.78	+	6.75	5.79E-07	7.82E-05
regulation of cellular component organization (GO:0051128)	2390	70	37.95	+	1.84	5.75E-07	7.84E-05
detoxification (GO:0098754)	135	13	2.14	+	6.06	6.03E-07	8.00E-05
secondary alcohol metabolic process (GO:1902652)	135	13	2.14	+	6.06	6.03E-07	8.07E-05
positive regulation of biological process (GO:0048518)	6331	144	100.52	+	1.43	6.44E-07	8.41E-05
multicellular organism development (GO:0007275)	4941	119	78.45	+	1.52	6.42E-07	8.45E-05
cholesterol biosynthetic process (GO:0006695)	40	8	.64	+	12.60	7.16E-07	9.20E-05
secondary alcohol biosynthetic process (GO:1902653)	40	8	.64	+	12.60	7.16E-07	9.28E-05
ribonucleotide metabolic process (GO:0009259)	332	20	5.27	+	3.79	7.90E-07	1.01E-04
purine nucleotide metabolic process (GO:0006163)	333	20	5.29	+	3.78	8.25E-07	1.04E-04
cellular component organization (GO:0016043)	5783	134	91.82	+	1.46	8.51E-07	1.07E-04
cellular developmental process (GO:0048869)	3634	94	57.70	+	1.63	8.93E-07	1.11E-04
organic cyclic compound catabolic process (GO:1901361)	466	24	7.40	+	3.24	9.10E-07	1.12E-04
SRP-dependent cotranslational protein targeting to membrane (GO:0006614)	96	11	1.52	+	7.22	9.37E-07	1.15E-04
sterol metabolic process (GO:0016125)	141	13	2.24	+	5.81	9.49E-07	1.15E-04
cell differentiation (GO:0030154)	3575	93	56.76	+	1.64	1.04E-06	1.24E-04
regulation of cell projection organization (GO:0031344)	648	29	10.29	+	2.82	1.03E-06	1.24E-04
epithelial cell differentiation (GO:0030855)	686	30	10.89	+	2.75	1.05E-06	1.25E-04
regulation of cellular localization (GO:0060341)	841	34	13.35	+	2.55	1.07E-06	1.26E-04
tissue development (GO:0009888)	1729	55	27.45	+	2.00	1.09E-06	1.28E-04
nuclear-transcribed mRNA catabolic process, nonsense-mediated decay (GO:0000184)	120	12	1.91	+	6.30	1.14E-06	1.31E-04
aromatic compound catabolic process (GO:0019439)	438	23	6.95	+	3.31	1.13E-06	1.31E-04
cellular response to oxygen-containing compound (GO:1901701)	1075	40	17.07	+	2.34	1.15E-06	1.32E-04
regulation of establishment of protein localization (GO:0070201)	581	27	9.22	+	2.93	1.25E-06	1.42E-04
regulation of cell adhesion (GO:0030155)	731	31	11.61	+	2.67	1.28E-06	1.44E-04
intracellular transport (GO:0046907)	1464	49	23.24	+	2.11	1.31E-06	1.47E-04
cytoplasmic translation (GO:0002181)	122	12	1.94	+	6.19	1.33E-06	1.48E-04
establishment of protein localization to membrane (GO:0090150)	313	19	4.97	+	3.82	1.34E-06	1.48E-04
ribose phosphate biosynthetic process (GO:0046390)	171	14	2.72	+	5.16	1.36E-06	1.49E-04
cotranslational protein targeting to membrane (GO:0006613)	101	11	1.60	+	6.86	1.48E-06	1.61E-04
regulation of neuron projection development (GO:0010975)	447	23	7.10	+	3.24	1.57E-06	1.70E-04
fructose 1,6-bisphosphate metabolic process (GO:0030388)	9	5	.14	+	34.99	1.61E-06	1.73E-04
cellular response to insulin stimulus (GO:0032869)	174	14	2.76	+	5.07	1.64E-06	1.76E-04
cholesterol metabolic process (GO:0008203)	125	12	1.98	+	6.05	1.69E-06	1.79E-04
regulation of protein transport (GO:0051223)	556	26	8.83	+	2.95	1.77E-06	1.87E-04
regulation of plasma membrane bounded cell projection organization (GO:0120035)	631	28	10.02	+	2.79	1.86E-06	1.95E-04
epithelium development (GO:0060429)	1113	40	17.67	+	2.26	2.15E-06	2.22E-04
NADP metabolic process (GO:0006739)	32	7	.51	+	13.78	2.14E-06	2.22E-04
nucleotide metabolic process (GO:0009117)	425	22	6.75	+	3.26	2.42E-06	2.48E-04
carbohydrate derivative biosynthetic process (GO:1901137)	604	27	9.59	+	2.82	2.51E-06	2.56E-04
response to drug (GO:0042493)	394	21	6.26	+	3.36	2.67E-06	2.70E-04
cellular protein localization (GO:0034613)	1470	48	23.34	+	2.06	2.71E-06	2.73E-04
cellular amide metabolic process (GO:0043603)	820	33	13.02	+	2.53	2.81E-06	2.82E-04
cytoskeleton organization (GO:0007010)	1212	42	19.24	+	2.18	2.98E-06	2.97E-04
response to insulin (GO:0032868)	241	16	3.83	+	4.18	3.17E-06	3.11E-04
pyruvate metabolic process (GO:0006090)	68	9	1.08	+	8.34	3.16E-06	3.13E-04
positive regulation of multicellular organismal process (GO:0051240)	1431	47	22.72	+	2.07	3.25E-06	3.17E-04
nucleoside phosphate metabolic process (GO:0006753)	436	22	6.92	+	3.18	3.58E-06	3.47E-04
generation of precursor metabolites and energy (GO:0006091)	403	21	6.40	+	3.28	3.73E-06	3.59E-04
negative regulation of biological process (GO:0048519)	5501	126	87.34	+	1.44	3.96E-06	3.79E-04
response to peptide hormone (GO:0043434)	406	21	6.45	+	3.26	4.16E-06	3.96E-04
establishment of protein localization (GO:0045184)	1397	46	22.18	+	2.07	4.21E-06	3.99E-04
monocarboxylic acid catabolic process (GO:0072329)	114	11	1.81	+	6.08	4.37E-06	4.11E-04
cellular macromolecule localization (GO:0070727)	1480	48	23.50	+	2.04	4.50E-06	4.21E-04
organic cyclic compound metabolic process (GO:1901360)	3182	83	50.52	+	1.64	4.79E-06	4.43E-04
response to organic cyclic compound (GO:0014070)	900	34	14.29	+	2.38	4.77E-06	4.43E-04
NADH metabolic process (GO:0006734)	37	7	.59	+	11.92	4.98E-06	4.55E-04
response to inorganic substance (GO:0010035)	553	25	8.78	+	2.85	4.96E-06	4.56E-04
viral transcription (GO:0019083)	116	11	1.84	+	5.97	5.10E-06	4.63E-04
positive regulation of cellular process (GO:0048522)	5741	130	91.15	+	1.43	5.22E-06	4.72E-04
heterocycle catabolic process (GO:0046700)	417	21	6.62	+	3.17	6.15E-06	5.50E-04
translational initiation (GO:0006413)	143	12	2.27	+	5.29	6.13E-06	5.50E-04
purine-containing compound biosynthetic process (GO:0072522)	171	13	2.72	+	4.79	6.89E-06	6.12E-04
viral gene expression (GO:0019080)	172	13	2.73	+	4.76	7.31E-06	6.45E-04
cellular response to organonitrogen compound (GO:0071417)	604	26	9.59	+	2.71	7.38E-06	6.48E-04
protein targeting (GO:0006605)	322	18	5.11	+	3.52	7.53E-06	6.54E-04
alcohol biosynthetic process (GO:0046165)	98	10	1.56	+	6.43	7.58E-06	6.55E-04
regulation of epithelial cell migration (GO:0010632)	229	15	3.64	+	4.13	7.50E-06	6.55E-04
cellular biosynthetic process (GO:0044249)	2715	73	43.11	+	1.69	7.69E-06	6.61E-04
cell adhesion (GO:0007155)	953	35	15.13	+	2.31	7.90E-06	6.75E-04
biological adhesion (GO:0022610)	959	35	15.23	+	2.30	8.54E-06	7.25E-04
purine ribonucleotide biosynthetic process (GO:0009152)	149	12	2.37	+	5.07	9.04E-06	7.64E-04
multicellular organismal process (GO:0032501)	6926	149	109.97	+	1.35	9.22E-06	7.75E-04
regulation of cell death (GO:0010941)	1668	51	26.48	+	1.93	9.33E-06	7.80E-04
protein transport (GO:0015031)	1300	43	20.64	+	2.08	1.04E-05	8.64E-04
nitrogen compound metabolic process (GO:0006807)	6886	148	109.33	+	1.35	1.16E-05	9.55E-04
fructose metabolic process (GO:0006000)	15	5	.24	+	20.99	1.16E-05	9.57E-04
NAD metabolic process (GO:0019674)	44	7	.70	+	10.02	1.37E-05	1.12E-03
cell redox homeostasis (GO:0045454)	44	7	.70	+	10.02	1.37E-05	1.12E-03
regulation of protein localization to plasma membrane (GO:1903076)	106	10	1.68	+	5.94	1.43E-05	1.16E-03
phosphorus metabolic process (GO:0006793)	1835	54	29.14	+	1.85	1.44E-05	1.16E-03
intracellular protein transport (GO:0006886)	781	30	12.40	+	2.42	1.46E-05	1.17E-03
regulation of cell migration (GO:0030334)	892	33	14.16	+	2.33	1.50E-05	1.20E-03
cellular response to peptide hormone stimulus (GO:0071375)	277	16	4.40	+	3.64	1.65E-05	1.31E-03
cellular detoxification (GO:1990748)	108	10	1.71	+	5.83	1.66E-05	1.31E-03
purine nucleotide biosynthetic process (GO:0006164)	160	12	2.54	+	4.72	1.76E-05	1.39E-03
response to metal ion (GO:0010038)	379	19	6.02	+	3.16	1.81E-05	1.42E-03
response to peptide (GO:1901652)	488	22	7.75	+	2.84	1.93E-05	1.50E-03
lipid metabolic process (GO:0006629)	1222	40	19.40	+	2.06	1.93E-05	1.50E-03
ribonucleotide biosynthetic process (GO:0009260)	163	12	2.59	+	4.64	2.10E-05	1.62E-03
regulation of vesicle-mediated transport (GO:0060627)	530	23	8.42	+	2.73	2.22E-05	1.70E-03
cellular nitrogen compound catabolic process (GO:0044270)	423	20	6.72	+	2.98	2.44E-05	1.84E-03
positive regulation of cell projection organization (GO:0031346)	353	18	5.60	+	3.21	2.43E-05	1.85E-03
regulation of locomotion (GO:0040012)	997	35	15.83	+	2.21	2.43E-05	1.86E-03
nuclear-transcribed mRNA catabolic process (GO:0000956)	195	13	3.10	+	4.20	2.55E-05	1.92E-03
amide biosynthetic process (GO:0043604)	537	23	8.53	+	2.70	2.70E-05	2.03E-03
cellular response to cytokine stimulus (GO:0071345)	1016	35	16.13	+	2.17	2.89E-05	2.15E-03
cellular response to toxic substance (GO:0097237)	116	10	1.84	+	5.43	2.95E-05	2.19E-03
alpha-amino acid metabolic process (GO:1901605)	198	13	3.14	+	4.14	2.97E-05	2.19E-03
regulation of endothelial cell migration (GO:0010594)	170	12	2.70	+	4.45	3.09E-05	2.27E-03
phosphate-containing compound metabolic process (GO:0006796)	1808	52	28.71	+	1.81	3.38E-05	2.47E-03
response to cytokine (GO:0034097)	1106	37	17.56	+	2.11	3.54E-05	2.58E-03
regulation of intracellular transport (GO:0032386)	364	18	5.78	+	3.11	3.57E-05	2.59E-03
fatty acid metabolic process (GO:0006631)	330	17	5.24	+	3.24	3.62E-05	2.61E-03
protein localization to organelle (GO:0033365)	742	28	11.78	+	2.38	3.73E-05	2.68E-03
positive regulation of protein transport (GO:0051222)	331	17	5.26	+	3.23	3.75E-05	2.68E-03
steroid metabolic process (GO:0008202)	265	15	4.21	+	3.56	3.78E-05	2.69E-03
endosomal transport (GO:0016197)	235	14	3.73	+	3.75	4.05E-05	2.87E-03
cell-cell adhesion (GO:0098609)	515	22	8.18	+	2.69	4.20E-05	2.96E-03
homeostatic process (GO:0042592)	1680	49	26.67	+	1.84	4.33E-05	3.04E-03
positive regulation of response to stimulus (GO:0048584)	2312	62	36.71	+	1.69	4.59E-05	3.21E-03
negative regulation of cellular process (GO:0048523)	4902	111	77.83	+	1.43	4.70E-05	3.26E-03
regulation of programmed cell death (GO:0043067)	1532	46	24.32	+	1.89	4.69E-05	3.26E-03
nucleobase-containing compound catabolic process (GO:0034655)	373	18	5.92	+	3.04	4.83E-05	3.34E-03
cellular response to peptide (GO:1901653)	339	17	5.38	+	3.16	4.98E-05	3.42E-03
negative regulation of cell death (GO:0060548)	1008	34	16.00	+	2.12	5.12E-05	3.49E-03
cellular response to nitrogen compound (GO:1901699)	664	26	10.54	+	2.47	5.11E-05	3.49E-03
regulation of cell motility (GO:2000145)	954	33	15.15	+	2.18	5.33E-05	3.61E-03
ameboidal-type cell migration (GO:0001667)	181	12	2.87	+	4.18	5.48E-05	3.70E-03
steroid biosynthetic process (GO:0006694)	126	10	2.00	+	5.00	5.66E-05	3.81E-03
protein targeting to membrane (GO:0006612)	182	12	2.89	+	4.15	5.76E-05	3.86E-03
regulation of multicellular organismal development (GO:2000026)	1332	41	21.15	+	1.94	6.50E-05	4.32E-03
actin cytoskeleton organization (GO:0030036)	531	22	8.43	+	2.61	6.48E-05	4.32E-03
positive regulation of establishment of protein localization (GO:1904951)	347	17	5.51	+	3.09	6.55E-05	4.33E-03
mRNA catabolic process (GO:0006402)	215	13	3.41	+	3.81	6.60E-05	4.35E-03
positive regulation of intracellular protein transport (GO:0090316)	185	12	2.94	+	4.09	6.68E-05	4.37E-03
extracellular matrix organization (GO:0030198)	383	18	6.08	+	2.96	6.68E-05	4.38E-03
secondary metabolic process (GO:0019748)	58	7	.92	+	7.60	6.84E-05	4.45E-03
extracellular structure organization (GO:0043062)	384	18	6.10	+	2.95	6.90E-05	4.47E-03
nitrogen compound transport (GO:0071705)	1708	49	27.12	+	1.81	7.31E-05	4.72E-03
external encapsulating structure organization (GO:0045229)	386	18	6.13	+	2.94	7.35E-05	4.72E-03
regulation of cell-substrate adhesion (GO:0010810)	218	13	3.46	+	3.76	7.54E-05	4.83E-03
canonical glycolysis (GO:0061621)	24	5	.38	+	13.12	7.89E-05	4.97E-03
regulation of immune system process (GO:0002682)	1717	49	27.26	+	1.80	7.80E-05	4.97E-03
glucose catabolic process to pyruvate (GO:0061718)	24	5	.38	+	13.12	7.89E-05	4.99E-03
NADH regeneration (GO:0006735)	24	5	.38	+	13.12	7.89E-05	5.01E-03
response to wounding (GO:0009611)	543	22	8.62	+	2.55	8.85E-05	5.55E-03
peptide metabolic process (GO:0006518)	544	22	8.64	+	2.55	9.08E-05	5.67E-03
negative regulation of gene expression (GO:0010629)	999	33	15.86	+	2.08	9.19E-05	5.72E-03
regulation of biological process (GO:0050789)	11898	224	188.91	+	1.19	9.27E-05	5.74E-03
regulation of apoptotic process (GO:0042981)	1493	44	23.71	+	1.86	9.80E-05	6.05E-03
response to stress (GO:0006950)	3626	86	57.57	+	1.49	1.02E-04	6.24E-03
cellular modified amino acid metabolic process (GO:0006575)	194	12	3.08	+	3.90	1.02E-04	6.27E-03
regulation of cellular component movement (GO:0051270)	1032	34	16.39	+	2.07	1.04E-04	6.32E-03
glycolytic process through fructose-6-phosphate (GO:0061615)	26	5	.41	+	12.11	1.10E-04	6.67E-03
keratinization (GO:0031424)	227	13	3.60	+	3.61	1.11E-04	6.68E-03
glycolytic process through glucose-6-phosphate (GO:0061620)	26	5	.41	+	12.11	1.10E-04	6.69E-03
positive regulation of cell adhesion (GO:0045785)	438	19	6.95	+	2.73	1.16E-04	6.96E-03
regulation of anatomical structure morphogenesis (GO:0022603)	967	32	15.35	+	2.08	1.18E-04	7.07E-03
protein localization to plasma membrane (GO:0072659)	198	12	3.14	+	3.82	1.23E-04	7.33E-03
tissue homeostasis (GO:0001894)	230	13	3.65	+	3.56	1.25E-04	7.45E-03
organic cyclic compound biosynthetic process (GO:1901362)	1196	37	18.99	+	1.95	1.30E-04	7.71E-03
positive regulation of cell migration (GO:0030335)	520	21	8.26	+	2.54	1.33E-04	7.87E-03
positive regulation of locomotion (GO:0040017)	560	22	8.89	+	2.47	1.35E-04	7.95E-03
carboxylic acid biosynthetic process (GO:0046394)	265	14	4.21	+	3.33	1.37E-04	8.00E-03
alpha-amino acid catabolic process (GO:1901606)	89	8	1.41	+	5.66	1.41E-04	8.24E-03
regulation of protein import (GO:1904589)	66	7	1.05	+	6.68	1.44E-04	8.36E-03
positive regulation of immune effector process (GO:0002699)	234	13	3.72	+	3.50	1.47E-04	8.54E-03
cellular response to endogenous stimulus (GO:0071495)	1152	36	18.29	+	1.97	1.49E-04	8.59E-03
glucose catabolic process (GO:0006007)	28	5	.44	+	11.25	1.50E-04	8.61E-03
tricarboxylic acid metabolic process (GO:0072350)	14	4	.22	+	17.99	1.51E-04	8.63E-03
cellular component biogenesis (GO:0044085)	2754	69	43.73	+	1.58	1.56E-04	8.93E-03
keratinocyte differentiation (GO:0030216)	270	14	4.29	+	3.27	1.64E-04	9.35E-03
organelle organization (GO:0006996)	3567	84	56.64	+	1.48	1.67E-04	9.45E-03
blood vessel development (GO:0001568)	492	20	7.81	+	2.56	1.77E-04	9.99E-03
response to external stimulus (GO:0009605)	2525	64	40.09	+	1.60	1.78E-04	1.00E-02
anatomical structure morphogenesis (GO:0009653)	2158	57	34.26	+	1.66	1.78E-04	1.00E-02
negative regulation of protein metabolic process (GO:0051248)	1112	35	17.66	+	1.98	1.84E-04	1.03E-02
regulation of body fluid levels (GO:0050878)	494	20	7.84	+	2.55	1.86E-04	1.04E-02
cellular oxidant detoxification (GO:0098869)	93	8	1.48	+	5.42	1.87E-04	1.04E-02
NADPH regeneration (GO:0006740)	15	4	.24	+	16.80	1.89E-04	1.04E-02
organic acid biosynthetic process (GO:0016053)	274	14	4.35	+	3.22	1.90E-04	1.05E-02
actin filament-based process (GO:0030029)	605	23	9.61	+	2.39	1.95E-04	1.07E-02
glucuronate catabolic process to xylulose 5-phosphate (GO:0019640)	5	3	.08	+	37.79	2.00E-04	1.08E-02
xylulose 5-phosphate metabolic process (GO:0051167)	5	3	.08	+	37.79	2.00E-04	1.08E-02
tube morphogenesis (GO:0035239)	654	24	10.38	+	2.31	2.01E-04	1.08E-02
cellular lipid metabolic process (GO:0044255)	977	32	15.51	+	2.06	2.03E-04	1.09E-02
xylulose 5-phosphate biosynthetic process (GO:1901159)	5	3	.08	+	37.79	2.00E-04	1.09E-02
glucuronate catabolic process (GO:0006064)	5	3	.08	+	37.79	2.00E-04	1.09E-02
citrate metabolic process (GO:0006101)	5	3	.08	+	37.79	2.00E-04	1.09E-02
epidermis development (GO:0008544)	422	18	6.70	+	2.69	2.13E-04	1.14E-02
cellular nitrogen compound biosynthetic process (GO:0044271)	1553	44	24.66	+	1.78	2.14E-04	1.14E-02
skin development (GO:0043588)	385	17	6.11	+	2.78	2.16E-04	1.14E-02
positive regulation of epithelial cell migration (GO:0010634)	150	10	2.38	+	4.20	2.18E-04	1.15E-02
biological process involved in symbiotic interaction (GO:0044403)	278	14	4.41	+	3.17	2.19E-04	1.15E-02
negative regulation of programmed cell death (GO:0043069)	914	30	14.51	+	2.07	2.29E-04	1.20E-02
RNA catabolic process (GO:0006401)	248	13	3.94	+	3.30	2.53E-04	1.32E-02
intermediate filament cytoskeleton organization (GO:0045104)	51	6	.81	+	7.41	2.58E-04	1.34E-02
negative regulation of intracellular signal transduction (GO:1902532)	507	20	8.05	+	2.48	2.58E-04	1.35E-02
sulfur compound biosynthetic process (GO:0044272)	184	11	2.92	+	3.77	2.61E-04	1.35E-02
regulation of proteolysis (GO:0030162)	743	26	11.80	+	2.20	2.63E-04	1.35E-02
glycosyl compound metabolic process (GO:1901657)	98	8	1.56	+	5.14	2.61E-04	1.35E-02
positive regulation of molecular function (GO:0044093)	1618	45	25.69	+	1.75	2.78E-04	1.43E-02
intermediate filament-based process (GO:0045103)	52	6	.83	+	7.27	2.84E-04	1.46E-02
negative regulation of cell projection organization (GO:0031345)	186	11	2.95	+	3.72	2.85E-04	1.46E-02
positive regulation of cell-substrate adhesion (GO:0010811)	127	9	2.02	+	4.46	2.94E-04	1.49E-02
epidermal cell differentiation (GO:0009913)	322	15	5.11	+	2.93	2.93E-04	1.49E-02
water-soluble vitamin biosynthetic process (GO:0042364)	6	3	.10	+	31.49	2.96E-04	1.50E-02
regulation of coagulation (GO:0050818)	75	7	1.19	+	5.88	2.98E-04	1.50E-02
regulation of immune effector process (GO:0002697)	435	18	6.91	+	2.61	3.02E-04	1.52E-02
response to alcohol (GO:0097305)	253	13	4.02	+	3.24	3.04E-04	1.52E-02
vasculature development (GO:0001944)	514	20	8.16	+	2.45	3.06E-04	1.53E-02
cell motility (GO:0048870)	1109	34	17.61	+	1.93	3.14E-04	1.56E-02
localization of cell (GO:0051674)	1109	34	17.61	+	1.93	3.14E-04	1.56E-02
cell migration (GO:0016477)	968	31	15.37	+	2.02	3.22E-04	1.59E-02
response to lipid (GO:0033993)	831	28	13.19	+	2.12	3.27E-04	1.61E-02
programmed cell death (GO:0012501)	1050	33	16.67	+	1.98	3.39E-04	1.66E-02
negative regulation of apoptotic process (GO:0043066)	895	29	14.21	+	2.04	3.52E-04	1.72E-02
cell-cell adhesion via plasma-membrane adhesion molecules (GO:0098742)	258	13	4.10	+	3.17	3.63E-04	1.77E-02
positive regulation of cell motility (GO:2000147)	545	21	8.65	+	2.43	3.65E-04	1.78E-02
cellular amino acid catabolic process (GO:0009063)	104	8	1.65	+	4.84	3.80E-04	1.84E-02
nucleotide biosynthetic process (GO:0009165)	226	12	3.59	+	3.34	3.89E-04	1.88E-02
movement of cell or subcellular component (GO:0006928)	1596	44	25.34	+	1.74	3.88E-04	1.88E-02
nucleoside bisphosphate metabolic process (GO:0033865)	133	9	2.11	+	4.26	4.04E-04	1.93E-02
ribonucleoside bisphosphate metabolic process (GO:0033875)	133	9	2.11	+	4.26	4.04E-04	1.94E-02
purine nucleoside bisphosphate metabolic process (GO:0034032)	133	9	2.11	+	4.26	4.04E-04	1.94E-02
purine nucleobase metabolic process (GO:0006144)	19	4	.30	+	13.26	4.10E-04	1.95E-02
tube development (GO:0035295)	856	28	13.59	+	2.06	4.17E-04	1.98E-02
positive regulation of intracellular transport (GO:0032388)	228	12	3.62	+	3.31	4.19E-04	1.99E-02
positive regulation of cellular component movement (GO:0051272)	558	21	8.86	+	2.37	4.30E-04	2.03E-02
blood vessel morphogenesis (GO:0048514)	410	17	6.51	+	2.61	4.32E-04	2.03E-02
cell death (GO:0008219)	1086	33	17.24	+	1.91	4.48E-04	2.10E-02
plasma membrane bounded cell projection organization (GO:0120036)	1175	35	18.66	+	1.88	4.52E-04	2.11E-02
nucleoside phosphate biosynthetic process (GO:1901293)	230	12	3.65	+	3.29	4.52E-04	2.11E-02
positive regulation of cell development (GO:0010720)	300	14	4.76	+	2.94	4.56E-04	2.12E-02
positive regulation of cell communication (GO:0010647)	1755	47	27.87	+	1.69	4.67E-04	2.16E-02
anatomical structure homeostasis (GO:0060249)	375	16	5.95	+	2.69	4.71E-04	2.18E-02
actin filament bundle assembly (GO:0051017)	58	6	.92	+	6.52	4.87E-04	2.25E-02
protein localization to cell periphery (GO:1990778)	233	12	3.70	+	3.24	5.04E-04	2.32E-02
cortical cytoskeleton organization (GO:0030865)	59	6	.94	+	6.40	5.30E-04	2.41E-02
regulation of lipid metabolic process (GO:0019216)	379	16	6.02	+	2.66	5.26E-04	2.41E-02
cellular aldehyde metabolic process (GO:0006081)	59	6	.94	+	6.40	5.30E-04	2.41E-02
nucleoside diphosphate phosphorylation (GO:0006165)	59	6	.94	+	6.40	5.30E-04	2.42E-02
cortical actin cytoskeleton organization (GO:0030866)	38	5	.60	+	8.29	5.35E-04	2.42E-02
nucleoside bisphosphate biosynthetic process (GO:0033866)	60	6	.95	+	6.30	5.75E-04	2.58E-02
ribonucleoside bisphosphate biosynthetic process (GO:0034030)	60	6	.95	+	6.30	5.75E-04	2.58E-02
purine nucleoside bisphosphate biosynthetic process (GO:0034033)	60	6	.95	+	6.30	5.75E-04	2.59E-02
negative regulation of neuron projection development (GO:0010977)	140	9	2.22	+	4.05	5.74E-04	2.59E-02
biological regulation (GO:0065007)	12568	230	199.55	+	1.15	5.82E-04	2.60E-02
regulation of T cell mediated cytotoxicity (GO:0001914)	39	5	.62	+	8.07	5.96E-04	2.65E-02
response to extracellular stimulus (GO:0009991)	531	20	8.43	+	2.37	6.07E-04	2.70E-02
actin filament bundle organization (GO:0061572)	61	6	.97	+	6.19	6.24E-04	2.74E-02
nucleotide phosphorylation (GO:0046939)	61	6	.97	+	6.19	6.24E-04	2.75E-02
regulation of cell morphogenesis (GO:0022604)	310	14	4.92	+	2.84	6.21E-04	2.75E-02
purine ribonucleoside triphosphate metabolic process (GO:0009205)	61	6	.97	+	6.19	6.24E-04	2.75E-02
positive regulation of signaling (GO:0023056)	1761	47	27.96	+	1.68	6.63E-04	2.88E-02
isoprenoid metabolic process (GO:0006720)	143	9	2.27	+	3.96	6.62E-04	2.88E-02
positive regulation of cell differentiation (GO:0045597)	840	27	13.34	+	2.02	6.59E-04	2.89E-02
glycolytic process (GO:0006096)	40	5	.64	+	7.87	6.62E-04	2.89E-02
purine ribonucleoside metabolic process (GO:0046128)	22	4	.35	+	11.45	6.67E-04	2.89E-02
regulation of exocytosis (GO:0017157)	207	11	3.29	+	3.35	6.70E-04	2.89E-02
regulation of protein import into nucleus (GO:0042306)	62	6	.98	+	6.09	6.75E-04	2.91E-02
locomotion (GO:0040011)	1345	38	21.36	+	1.78	6.81E-04	2.93E-02
regulation of cellular component size (GO:0032535)	389	16	6.18	+	2.59	6.88E-04	2.95E-02
positive regulation of cellular component organization (GO:0051130)	1161	34	18.43	+	1.84	6.92E-04	2.96E-02
response to oxidative stress (GO:0006979)	390	16	6.19	+	2.58	7.06E-04	3.01E-02
ATP generation from ADP (GO:0006757)	41	5	.65	+	7.68	7.33E-04	3.12E-02
chylomicron remodeling (GO:0034371)	9	3	.14	+	20.99	7.50E-04	3.15E-02
very-low-density lipoprotein particle remodeling (GO:0034372)	9	3	.14	+	20.99	7.50E-04	3.16E-02
oxaloacetate metabolic process (GO:0006107)	9	3	.14	+	20.99	7.50E-04	3.17E-02
carbohydrate catabolic process (GO:0016052)	116	8	1.84	+	4.34	7.49E-04	3.17E-02
positive regulation of signal transduction (GO:0009967)	1584	43	25.15	+	1.71	7.67E-04	3.21E-02
positive regulation of blood coagulation (GO:0030194)	23	4	.37	+	10.95	7.74E-04	3.23E-02
positive regulation of hemostasis (GO:1900048)	23	4	.37	+	10.95	7.74E-04	3.24E-02
amyloid fibril formation (GO:1990000)	64	6	1.02	+	5.90	7.88E-04	3.27E-02
angiogenesis (GO:0001525)	318	14	5.05	+	2.77	7.87E-04	3.28E-02
fatty-acyl-CoA metabolic process (GO:0035337)	42	5	.67	+	7.50	8.10E-04	3.35E-02
cellular aromatic compound metabolic process (GO:0006725)	2937	69	46.63	+	1.48	8.15E-04	3.36E-02
negative regulation of cellular component organization (GO:0051129)	724	24	11.50	+	2.09	8.28E-04	3.41E-02
regulation of developmental growth (GO:0048638)	320	14	5.08	+	2.76	8.34E-04	3.41E-02
response to nutrient levels (GO:0031667)	501	19	7.95	+	2.39	8.31E-04	3.41E-02
cellular component assembly (GO:0022607)	2494	61	39.60	+	1.54	8.34E-04	3.41E-02
regulation of intracellular signal transduction (GO:1902531)	1839	48	29.20	+	1.64	8.47E-04	3.45E-02
negative regulation of cell adhesion (GO:0007162)	285	13	4.53	+	2.87	8.82E-04	3.59E-02
serine family amino acid metabolic process (GO:0009069)	43	5	.68	+	7.32	8.93E-04	3.60E-02
glucose 6-phosphate metabolic process (GO:0051156)	24	4	.38	+	10.50	8.92E-04	3.61E-02
cell projection organization (GO:0030030)	1221	35	19.39	+	1.81	8.98E-04	3.61E-02
positive regulation of coagulation (GO:0050820)	24	4	.38	+	10.50	8.92E-04	3.61E-02
glutathione metabolic process (GO:0006749)	66	6	1.05	+	5.73	9.15E-04	3.65E-02
cellular homeostasis (GO:0019725)	895	28	14.21	+	1.97	9.14E-04	3.66E-02
regulation of reactive oxygen species metabolic process (GO:2000377)	150	9	2.38	+	3.78	9.13E-04	3.66E-02
regulation of blood vessel endothelial cell migration (GO:0043535)	92	7	1.46	+	4.79	9.31E-04	3.71E-02
CD40 signaling pathway (GO:0023035)	10	3	.16	+	18.89	9.63E-04	3.82E-02
regulation of Fc receptor mediated stimulatory signaling pathway (GO:0060368)	10	3	.16	+	18.89	9.63E-04	3.83E-02
lipid biosynthetic process (GO:0008610)	630	22	10.00	+	2.20	9.84E-04	3.86E-02
purine nucleoside triphosphate metabolic process (GO:0009144)	67	6	1.06	+	5.64	9.84E-04	3.87E-02
regulation of response to stimulus (GO:0048583)	4306	94	68.37	+	1.37	9.83E-04	3.87E-02
cell-substrate adhesion (GO:0031589)	184	10	2.92	+	3.42	9.91E-04	3.88E-02
regulation of collagen metabolic process (GO:0010712)	44	5	.70	+	7.16	9.82E-04	3.88E-02
wound healing (GO:0042060)	444	17	7.05	+	2.41	1.01E-03	3.95E-02
sensory perception of smell (GO:0007608)	468	0	7.43	-	< 0.01	1.02E-03	3.98E-02
positive regulation of gene expression (GO:0010628)	1169	34	18.56	+	1.83	1.05E-03	4.09E-02
ribonucleoside triphosphate metabolic process (GO:0009199)	68	6	1.08	+	5.56	1.06E-03	4.09E-02
cellular modified amino acid biosynthetic process (GO:0042398)	45	5	.71	+	7.00	1.08E-03	4.14E-02
thioester biosynthetic process (GO:0035384)	45	5	.71	+	7.00	1.08E-03	4.15E-02
acyl-CoA biosynthetic process (GO:0071616)	45	5	.71	+	7.00	1.08E-03	4.16E-02
regulation of signal transduction (GO:0009966)	3128	72	49.67	+	1.45	1.10E-03	4.23E-02
dicarboxylic acid metabolic process (GO:0043648)	95	7	1.51	+	4.64	1.11E-03	4.25E-02
response to carbohydrate (GO:0009743)	187	10	2.97	+	3.37	1.11E-03	4.25E-02
regulation of ERK1 and ERK2 cascade (GO:0070372)	294	13	4.67	+	2.78	1.16E-03	4.40E-02
purine nucleoside metabolic process (GO:0042278)	26	4	.41	+	9.69	1.16E-03	4.42E-02
epiboly (GO:0090504)	26	4	.41	+	9.69	1.16E-03	4.43E-02
positive regulation of protein import (GO:1904591)	46	5	.73	+	6.85	1.18E-03	4.45E-02
purine ribonucleoside triphosphate biosynthetic process (GO:0009206)	46	5	.73	+	6.85	1.18E-03	4.46E-02
regulation of cell differentiation (GO:0045595)	1586	42	25.18	+	1.67	1.20E-03	4.51E-02
regulation of blood coagulation (GO:0030193)	70	6	1.11	+	5.40	1.22E-03	4.54E-02
fructose 6-phosphate metabolic process (GO:0006002)	11	3	.17	+	17.18	1.21E-03	4.55E-02
response to cadmium ion (GO:0046686)	70	6	1.11	+	5.40	1.22E-03	4.55E-02
thioester metabolic process (GO:0035383)	97	7	1.54	+	4.55	1.24E-03	4.60E-02
acyl-CoA metabolic process (GO:0006637)	97	7	1.54	+	4.55	1.24E-03	4.61E-02
negative regulation of multicellular organismal process (GO:0051241)	1014	30	16.10	+	1.86	1.24E-03	4.62E-02
cellular response to hormone stimulus (GO:0032870)	529	19	8.40	+	2.26	1.24E-03	4.63E-02
antigen processing and presentation (GO:0019882)	225	11	3.57	+	3.08	1.28E-03	4.72E-02
peptide biosynthetic process (GO:0043043)	414	16	6.57	+	2.43	1.29E-03	4.72E-02
gland development (GO:0048732)	414	16	6.57	+	2.43	1.29E-03	4.74E-02
purine nucleoside triphosphate biosynthetic process (GO:0009145)	47	5	.75	+	6.70	1.29E-03	4.75E-02
cell-matrix adhesion (GO:0007160)	127	8	2.02	+	3.97	1.30E-03	4.76E-02
integrin-mediated signaling pathway (GO:0007229)	98	7	1.56	+	4.50	1.31E-03	4.80E-02
toxin metabolic process (GO:0009404)	27	4	.43	+	9.33	1.32E-03	4.81E-02
positive regulation of neurogenesis (GO:0050769)	227	11	3.60	+	3.05	1.37E-03	4.97E-02
regulation of hemostasis (GO:1900046)	72	6	1.14	+	5.25	1.39E-03	5.01E-02
nucleoside metabolic process (GO:0009116)	72	6	1.14	+	5.25	1.39E-03	5.02E-02
tissue migration (GO:0090130)	99	7	1.57	+	4.45	1.39E-03	5.03E-02
regulation of growth (GO:0040008)	661	22	10.50	+	2.10	1.39E-03	5.03E-02
hexose catabolic process (GO:0019320)	48	5	.76	+	6.56	1.40E-03	5.05E-02
'de novo' GDP-L-fucose biosynthetic process (GO:0042351)	2	2	.03	+	62.98	1.43E-03	5.11E-02
sucrose biosynthetic process (GO:0005986)	2	2	.03	+	62.98	1.43E-03	5.12E-02
platelet degranulation (GO:0002576)	129	8	2.05	+	3.91	1.43E-03	5.12E-02
organelle localization (GO:0051640)	609	21	9.67	+	2.17	1.46E-03	5.21E-02
regulation of cholesterol esterification (GO:0010872)	12	3	.19	+	15.75	1.50E-03	5.27E-02
regulation of memory T cell differentiation (GO:0043380)	12	3	.19	+	15.75	1.50E-03	5.28E-02
plasma lipoprotein particle assembly (GO:0034377)	28	4	.44	+	9.00	1.49E-03	5.29E-02
actin filament network formation (GO:0051639)	12	3	.19	+	15.75	1.50E-03	5.29E-02
homeostasis of number of cells within a tissue (GO:0048873)	28	4	.44	+	9.00	1.49E-03	5.30E-02
detection of chemical stimulus involved in sensory perception of smell (GO:0050911)	441	0	7.00	-	< 0.01	1.51E-03	5.31E-02
viral life cycle (GO:0019058)	230	11	3.65	+	3.01	1.51E-03	5.31E-02
plasma lipoprotein particle organization (GO:0071827)	49	5	.78	+	6.43	1.53E-03	5.33E-02
ADP metabolic process (GO:0046031)	49	5	.78	+	6.43	1.53E-03	5.34E-02
regulation of protein metabolic process (GO:0051246)	2665	63	42.31	+	1.49	1.56E-03	5.44E-02
positive regulation of immune system process (GO:0002684)	1069	31	16.97	+	1.83	1.57E-03	5.46E-02
digestive system process (GO:0022600)	74	6	1.17	+	5.11	1.59E-03	5.50E-02
positive regulation of immunoglobulin production (GO:0002639)	50	5	.79	+	6.30	1.66E-03	5.74E-02
modulation by host of viral process (GO:0044788)	29	4	.46	+	8.69	1.68E-03	5.76E-02
positive regulation of T cell mediated cytotoxicity (GO:0001916)	29	4	.46	+	8.69	1.68E-03	5.77E-02
regulation of cell development (GO:0060284)	500	18	7.94	+	2.27	1.68E-03	5.78E-02
actin filament organization (GO:0007015)	270	12	4.29	+	2.80	1.70E-03	5.83E-02
antigen processing and presentation of peptide or polysaccharide antigen via MHC class II (GO:0002504)	103	7	1.64	+	4.28	1.72E-03	5.89E-02
regulation of transcription by RNA polymerase II (GO:0006357)	2595	23	41.20	-	.56	1.74E-03	5.93E-02
regulation of production of molecular mediator of immune response (GO:0002700)	166	9	2.64	+	3.41	1.78E-03	6.07E-02
iron ion transport (GO:0006826)	76	6	1.21	+	4.97	1.80E-03	6.12E-02
triglyceride-rich lipoprotein particle remodeling (GO:0034370)	13	3	.21	+	14.53	1.82E-03	6.15E-02
vitamin biosynthetic process (GO:0009110)	13	3	.21	+	14.53	1.82E-03	6.17E-02
regulation of cell communication (GO:0010646)	3509	78	55.71	+	1.40	1.83E-03	6.18E-02
negative regulation of cell communication (GO:0010648)	1401	38	22.24	+	1.71	1.84E-03	6.18E-02
pentose-phosphate shunt (GO:0006098)	13	3	.21	+	14.53	1.82E-03	6.18E-02
homophilic cell adhesion via plasma membrane adhesion molecules (GO:0007156)	167	9	2.65	+	3.39	1.85E-03	6.22E-02
negative regulation of signaling (GO:0023057)	1405	38	22.31	+	1.70	1.86E-03	6.23E-02
acetyl-CoA metabolic process (GO:0006084)	30	4	.48	+	8.40	1.88E-03	6.27E-02
regulation of peptidase activity (GO:0052547)	457	17	7.26	+	2.34	1.89E-03	6.30E-02
ribonucleoside triphosphate biosynthetic process (GO:0009201)	52	5	.83	+	6.06	1.95E-03	6.48E-02
positive regulation of transmembrane transport (GO:0034764)	238	11	3.78	+	2.91	1.95E-03	6.49E-02
positive regulation of developmental growth (GO:0048639)	169	9	2.68	+	3.35	2.00E-03	6.63E-02
cellular response to stimulus (GO:0051716)	6807	135	108.08	+	1.25	2.05E-03	6.79E-02
regulation of Ras protein signal transduction (GO:0046578)	204	10	3.24	+	3.09	2.06E-03	6.80E-02
organelle localization by membrane tethering (GO:0140056)	170	9	2.70	+	3.33	2.08E-03	6.85E-02
fatty-acyl-CoA biosynthetic process (GO:0046949)	31	4	.49	+	8.13	2.09E-03	6.86E-02
negative regulation of cellular protein metabolic process (GO:0032269)	1040	30	16.51	+	1.82	2.10E-03	6.87E-02
protein-lipid complex subunit organization (GO:0071825)	53	5	.84	+	5.94	2.10E-03	6.87E-02
response to iron ion (GO:0010039)	31	4	.49	+	8.13	2.09E-03	6.88E-02
serine family amino acid catabolic process (GO:0009071)	14	3	.22	+	13.50	2.19E-03	7.13E-02
positive regulation of endothelial cell migration (GO:0010595)	108	7	1.71	+	4.08	2.22E-03	7.21E-02
positive regulation of catalytic activity (GO:0043085)	1240	34	19.69	+	1.73	2.25E-03	7.29E-02
monosaccharide catabolic process (GO:0046365)	54	5	.86	+	5.83	2.27E-03	7.35E-02
positive regulation of ERK1 and ERK2 cascade (GO:0070374)	207	10	3.29	+	3.04	2.28E-03	7.37E-02
nucleoside catabolic process (GO:0009164)	32	4	.51	+	7.87	2.33E-03	7.46E-02
heterocycle metabolic process (GO:0046483)	2891	66	45.90	+	1.44	2.31E-03	7.46E-02
intestinal absorption (GO:0050892)	32	4	.51	+	7.87	2.33E-03	7.47E-02
establishment of protein localization to endoplasmic reticulum membrane (GO:0097051)	3	2	.05	+	41.99	2.36E-03	7.48E-02
protein-lipid complex assembly (GO:0065005)	32	4	.51	+	7.87	2.33E-03	7.49E-02
regulation of neurofibrillary tangle assembly (GO:1902996)	3	2	.05	+	41.99	2.36E-03	7.49E-02
negative regulation of nitric oxide mediated signal transduction (GO:0010751)	3	2	.05	+	41.99	2.36E-03	7.51E-02
GDP-L-fucose biosynthetic process (GO:0042350)	3	2	.05	+	41.99	2.36E-03	7.52E-02
vitamin B6 biosynthetic process (GO:0042819)	3	2	.05	+	41.99	2.36E-03	7.54E-02
sucrose metabolic process (GO:0005985)	3	2	.05	+	41.99	2.36E-03	7.55E-02
leukocyte cell-cell adhesion (GO:0007159)	55	5	.87	+	5.73	2.45E-03	7.73E-02
regulation of cell growth (GO:0001558)	422	16	6.70	+	2.39	2.49E-03	7.86E-02
regulation of nucleocytoplasmic transport (GO:0046822)	111	7	1.76	+	3.97	2.57E-03	8.08E-02
odontogenesis of dentin-containing tooth (GO:0042475)	82	6	1.30	+	4.61	2.58E-03	8.08E-02
fatty acid derivative metabolic process (GO:1901568)	82	6	1.30	+	4.61	2.58E-03	8.10E-02
regulation of lipoprotein metabolic process (GO:0050746)	15	3	.24	+	12.60	2.59E-03	8.12E-02
regulation of neurogenesis (GO:0050767)	364	14	5.78	+	2.42	2.65E-03	8.26E-02
multicellular organismal homeostasis (GO:0048871)	364	14	5.78	+	2.42	2.65E-03	8.27E-02
regulation of endopeptidase activity (GO:0052548)	429	16	6.81	+	2.35	2.66E-03	8.29E-02
ion transport (GO:0006811)	1200	33	19.05	+	1.73	2.78E-03	8.63E-02
positive regulation of wound healing (GO:0090303)	57	5	.91	+	5.52	2.83E-03	8.76E-02
negative regulation of signal transduction (GO:0009968)	1305	35	20.72	+	1.69	2.84E-03	8.77E-02
regulation of leukocyte cell-cell adhesion (GO:1903037)	327	13	5.19	+	2.50	2.84E-03	8.77E-02
tricarboxylic acid cycle (GO:0006099)	34	4	.54	+	7.41	2.84E-03	8.78E-02
proteolysis (GO:0006508)	1306	35	20.74	+	1.69	2.86E-03	8.80E-02
nucleoside diphosphate metabolic process (GO:0009132)	84	6	1.33	+	4.50	2.89E-03	8.82E-02
membrane docking (GO:0022406)	179	9	2.84	+	3.17	2.89E-03	8.83E-02
positive regulation of axonogenesis (GO:0050772)	84	6	1.33	+	4.50	2.89E-03	8.84E-02
water-soluble vitamin metabolic process (GO:0006767)	84	6	1.33	+	4.50	2.89E-03	8.86E-02
entry into host (GO:0044409)	114	7	1.81	+	3.87	2.95E-03	9.00E-02
negative regulation of protein modification process (GO:0031400)	558	19	8.86	+	2.14	2.98E-03	9.06E-02
ribosome biogenesis (GO:0042254)	329	13	5.22	+	2.49	2.98E-03	9.06E-02
cholesterol homeostasis (GO:0042632)	85	6	1.35	+	4.45	3.05E-03	9.13E-02
aflatoxin metabolic process (GO:0046222)	16	3	.25	+	11.81	3.04E-03	9.13E-02
mycotoxin metabolic process (GO:0043385)	16	3	.25	+	11.81	3.04E-03	9.15E-02
organic heteropentacyclic compound metabolic process (GO:1901376)	16	3	.25	+	11.81	3.04E-03	9.17E-02
aspartate family amino acid metabolic process (GO:0009066)	58	5	.92	+	5.43	3.03E-03	9.18E-02
pentose metabolic process (GO:0019321)	16	3	.25	+	11.81	3.04E-03	9.18E-02
lipoxygenase pathway (GO:0019372)	16	3	.25	+	11.81	3.04E-03	9.20E-02
nucleobase metabolic process (GO:0009112)	35	4	.56	+	7.20	3.13E-03	9.29E-02
negative regulation of blood vessel endothelial cell migration (GO:0043537)	35	4	.56	+	7.20	3.13E-03	9.30E-02
regulation of metabolic process (GO:0019222)	6874	135	109.14	+	1.24	3.11E-03	9.31E-02
ATP biosynthetic process (GO:0006754)	35	4	.56	+	7.20	3.13E-03	9.32E-02
heterotypic cell-cell adhesion (GO:0034113)	35	4	.56	+	7.20	3.13E-03	9.34E-02
sterol homeostasis (GO:0055092)	86	6	1.37	+	4.39	3.22E-03	9.53E-02
regulation of catalytic activity (GO:0050790)	2433	57	38.63	+	1.48	3.26E-03	9.64E-02
regulation of MAPK cascade (GO:0043408)	707	22	11.23	+	1.96	3.34E-03	9.84E-02
GDP-L-fucose metabolic process (GO:0046368)	4	2	.06	+	31.49	3.50E-03	1.01E-01
regulation of phospholipid efflux (GO:1902994)	4	2	.06	+	31.49	3.50E-03	1.01E-01
positive regulation of phospholipid efflux (GO:1902995)	4	2	.06	+	31.49	3.50E-03	1.01E-01
positive regulation of growth (GO:0045927)	257	11	4.08	+	2.70	3.44E-03	1.01E-01
regulation of cholesterol efflux (GO:0010874)	36	4	.57	+	7.00	3.44E-03	1.01E-01
Golgi vesicle fusion to target membrane (GO:0048210)	4	2	.06	+	31.49	3.50E-03	1.01E-01
ribonucleoside metabolic process (GO:0009119)	36	4	.57	+	7.00	3.44E-03	1.01E-01
regulation of vasculogenesis (GO:2001212)	17	3	.27	+	11.11	3.54E-03	1.01E-01
positive regulation of Fc-gamma receptor signaling pathway involved in phagocytosis (GO:1905451)	4	2	.06	+	31.49	3.50E-03	1.01E-01
regulation of T cell activation (GO:0050863)	336	13	5.33	+	2.44	3.54E-03	1.01E-01
protein insertion into mitochondrial outer membrane (GO:0045040)	4	2	.06	+	31.49	3.50E-03	1.01E-01
xylulose metabolic process (GO:0005997)	4	2	.06	+	31.49	3.50E-03	1.02E-01
glycine catabolic process (GO:0006546)	4	2	.06	+	31.49	3.50E-03	1.02E-01
outer mitochondrial membrane organization (GO:0007008)	4	2	.06	+	31.49	3.50E-03	1.02E-01
regulation of Rho protein signal transduction (GO:0035023)	88	6	1.40	+	4.29	3.58E-03	1.02E-01
calcium-independent cell-matrix adhesion (GO:0007161)	4	2	.06	+	31.49	3.50E-03	1.02E-01
cellular response to leukemia inhibitory factor (GO:1990830)	88	6	1.40	+	4.29	3.58E-03	1.02E-01
positive regulation of protein lipidation (GO:1903061)	4	2	.06	+	31.49	3.50E-03	1.02E-01
pentose biosynthetic process (GO:0019322)	4	2	.06	+	31.49	3.50E-03	1.03E-01
protein metabolic process (GO:0019538)	4203	89	66.73	+	1.33	3.64E-03	1.04E-01
hemostasis (GO:0007599)	298	12	4.73	+	2.54	3.68E-03	1.04E-01
positive regulation of production of molecular mediator of immune response (GO:0002702)	119	7	1.89	+	3.70	3.70E-03	1.05E-01
epithelial cell migration (GO:0010631)	89	6	1.41	+	4.25	3.78E-03	1.07E-01
response to leukemia inhibitory factor (GO:1990823)	89	6	1.41	+	4.25	3.78E-03	1.07E-01
biological process involved in interaction with host (GO:0051701)	187	9	2.97	+	3.03	3.81E-03	1.07E-01
purine nucleoside diphosphate metabolic process (GO:0009135)	62	5	.98	+	5.08	3.96E-03	1.11E-01
regulation of signaling (GO:0023051)	3545	77	56.29	+	1.37	3.95E-03	1.11E-01
purine ribonucleoside diphosphate metabolic process (GO:0009179)	62	5	.98	+	5.08	3.96E-03	1.11E-01
regulation of molecular function (GO:0065009)	3118	69	49.51	+	1.39	4.03E-03	1.13E-01
lipid homeostasis (GO:0055088)	154	8	2.45	+	3.27	4.04E-03	1.13E-01
organonitrogen compound catabolic process (GO:1901565)	1091	30	17.32	+	1.73	4.07E-03	1.13E-01
2-oxoglutarate metabolic process (GO:0006103)	18	3	.29	+	10.50	4.08E-03	1.13E-01
acylglycerol homeostasis (GO:0055090)	38	4	.60	+	6.63	4.11E-03	1.14E-01
positive regulation of metabolic process (GO:0009893)	3820	82	60.65	+	1.35	4.08E-03	1.14E-01
triglyceride homeostasis (GO:0070328)	38	4	.60	+	6.63	4.11E-03	1.14E-01
vesicle docking involved in exocytosis (GO:0006904)	38	4	.60	+	6.63	4.11E-03	1.14E-01
nucleoside triphosphate metabolic process (GO:0009141)	91	6	1.44	+	4.15	4.18E-03	1.15E-01
exocytic process (GO:0140029)	63	5	1.00	+	5.00	4.22E-03	1.16E-01
epithelium migration (GO:0090132)	92	6	1.46	+	4.11	4.40E-03	1.21E-01
regulation of collagen biosynthetic process (GO:0032965)	39	4	.62	+	6.46	4.47E-03	1.23E-01
one-carbon metabolic process (GO:0006730)	39	4	.62	+	6.46	4.47E-03	1.23E-01
nucleoside triphosphate biosynthetic process (GO:0009142)	64	5	1.02	+	4.92	4.49E-03	1.23E-01
movement in host environment (GO:0052126)	124	7	1.97	+	3.56	4.58E-03	1.25E-01
terpenoid metabolic process (GO:0006721)	124	7	1.97	+	3.56	4.58E-03	1.25E-01
cellular response to low-density lipoprotein particle stimulus (GO:0071404)	19	3	.30	+	9.94	4.67E-03	1.27E-01
N-glycan processing (GO:0006491)	19	3	.30	+	9.94	4.67E-03	1.27E-01
glycine metabolic process (GO:0006544)	19	3	.30	+	9.94	4.67E-03	1.27E-01
disaccharide biosynthetic process (GO:0046351)	5	2	.08	+	25.19	4.86E-03	1.27E-01
carnitine transport (GO:0015879)	5	2	.08	+	25.19	4.86E-03	1.28E-01
vitamin B6 metabolic process (GO:0042816)	5	2	.08	+	25.19	4.86E-03	1.28E-01
protein transport to vacuole involved in ubiquitin-dependent protein catabolic process via the multivesicular body sorting pathway (GO:0043328)	5	2	.08	+	25.19	4.86E-03	1.28E-01
tissue morphogenesis (GO:0048729)	545	18	8.65	+	2.08	4.74E-03	1.28E-01
activation of protein kinase C activity (GO:1990051)	5	2	.08	+	25.19	4.86E-03	1.28E-01
ribonucleoside diphosphate metabolic process (GO:0009185)	65	5	1.03	+	4.84	4.78E-03	1.28E-01
axon development (GO:0061564)	421	15	6.68	+	2.24	4.76E-03	1.29E-01
positive regulation of lipoprotein metabolic process (GO:0050747)	5	2	.08	+	25.19	4.86E-03	1.29E-01
response to fatty acid (GO:0070542)	65	5	1.03	+	4.84	4.78E-03	1.29E-01
positive regulation of apoptotic signaling pathway (GO:2001235)	125	7	1.98	+	3.53	4.77E-03	1.29E-01
NADH oxidation (GO:0006116)	5	2	.08	+	25.19	4.86E-03	1.29E-01
response to indole-3-methanol (GO:0071680)	5	2	.08	+	25.19	4.86E-03	1.29E-01
cellular response to indole-3-methanol (GO:0071681)	5	2	.08	+	25.19	4.86E-03	1.29E-01
B cell selection (GO:0002339)	5	2	.08	+	25.19	4.86E-03	1.29E-01
positive regulation of intracellular signal transduction (GO:1902533)	1040	29	16.51	+	1.76	4.83E-03	1.30E-01
response to iron(III) ion (GO:0010041)	5	2	.08	+	25.19	4.86E-03	1.30E-01
cell-cell adhesion mediated by integrin (GO:0033631)	5	2	.08	+	25.19	4.86E-03	1.30E-01
negative regulation of supramolecular fiber organization (GO:1902904)	159	8	2.52	+	3.17	4.85E-03	1.30E-01
regulation of mitochondrion organization (GO:0010821)	160	8	2.54	+	3.15	5.03E-03	1.32E-01
biological process involved in interaction with symbiont (GO:0051702)	95	6	1.51	+	3.98	5.10E-03	1.33E-01
positive regulation of neuron projection development (GO:0010976)	161	8	2.56	+	3.13	5.21E-03	1.36E-01
negative regulation of vascular permeability (GO:0043116)	20	3	.32	+	9.45	5.31E-03	1.37E-01
negative regulation of actin filament depolymerization (GO:0030835)	41	4	.65	+	6.14	5.27E-03	1.37E-01
regulation of sterol biosynthetic process (GO:0106118)	20	3	.32	+	9.45	5.31E-03	1.37E-01
negative regulation of intracellular protein transport (GO:0090317)	41	4	.65	+	6.14	5.27E-03	1.38E-01
vesicle organization (GO:0016050)	313	12	4.97	+	2.41	5.34E-03	1.38E-01
positive regulation of amino acid transport (GO:0051957)	20	3	.32	+	9.45	5.31E-03	1.38E-01
positive regulation of DNA-binding transcription factor activity (GO:0051091)	273	11	4.33	+	2.54	5.30E-03	1.38E-01
regulation of cholesterol biosynthetic process (GO:0045540)	20	3	.32	+	9.45	5.31E-03	1.38E-01
cellular amino acid biosynthetic process (GO:0008652)	67	5	1.06	+	4.70	5.38E-03	1.39E-01
positive regulation of nervous system development (GO:0051962)	274	11	4.35	+	2.53	5.44E-03	1.39E-01
carbohydrate derivative catabolic process (GO:1901136)	198	9	3.14	+	2.86	5.43E-03	1.39E-01
protein stabilization (GO:0050821)	198	9	3.14	+	2.86	5.43E-03	1.40E-01
negative regulation of epithelial cell proliferation (GO:0050680)	129	7	2.05	+	3.42	5.61E-03	1.43E-01
regulation of axon extension (GO:0030516)	97	6	1.54	+	3.90	5.60E-03	1.43E-01
lipid transport (GO:0006869)	315	12	5.00	+	2.40	5.60E-03	1.43E-01
membrane organization (GO:0061024)	972	27	15.43	+	1.75	5.60E-03	1.43E-01
positive regulation of response to wounding (GO:1903036)	68	5	1.08	+	4.63	5.71E-03	1.45E-01
positive regulation of peptidase activity (GO:0010952)	200	9	3.18	+	2.83	5.77E-03	1.46E-01
cellular response to oxidative stress (GO:0034599)	238	10	3.78	+	2.65	5.85E-03	1.48E-01
negative regulation of locomotion (GO:0040013)	317	12	5.03	+	2.38	5.87E-03	1.48E-01
negative regulation of amyloid precursor protein catabolic process (GO:1902992)	21	3	.33	+	9.00	6.00E-03	1.51E-01
adaptive thermogenesis (GO:1990845)	21	3	.33	+	9.00	6.00E-03	1.52E-01
endothelial cell migration (GO:0043542)	69	5	1.10	+	4.56	6.05E-03	1.52E-01
regulation of wound healing (GO:0061041)	131	7	2.08	+	3.37	6.06E-03	1.52E-01
translation (GO:0006412)	387	14	6.14	+	2.28	6.17E-03	1.54E-01
positive regulation of protein import into nucleus (GO:0042307)	43	4	.68	+	5.86	6.16E-03	1.54E-01
cell-substrate junction organization (GO:0150115)	43	4	.68	+	5.86	6.16E-03	1.54E-01
regulation of cell-cell adhesion (GO:0022407)	439	15	6.97	+	2.15	6.19E-03	1.54E-01
glycosyl compound catabolic process (GO:1901658)	43	4	.68	+	5.86	6.16E-03	1.54E-01
antigen processing and presentation of exogenous peptide antigen via MHC class II (GO:0019886)	99	6	1.57	+	3.82	6.15E-03	1.54E-01
body morphogenesis (GO:0010171)	43	4	.68	+	5.86	6.16E-03	1.54E-01
regulation of cellular protein metabolic process (GO:0032268)	2501	57	39.71	+	1.44	6.23E-03	1.55E-01
negative regulation of protein folding (GO:1903333)	6	2	.10	+	20.99	6.41E-03	1.57E-01
positive regulation of protein localization to cell cortex (GO:1904778)	6	2	.10	+	20.99	6.41E-03	1.57E-01
regulation of Fc-gamma receptor signaling pathway involved in phagocytosis (GO:1905449)	6	2	.10	+	20.99	6.41E-03	1.57E-01
glycerol biosynthetic process (GO:0006114)	6	2	.10	+	20.99	6.41E-03	1.57E-01
NADPH oxidation (GO:0070995)	6	2	.10	+	20.99	6.41E-03	1.58E-01
peripheral nervous system axon regeneration (GO:0014012)	6	2	.10	+	20.99	6.41E-03	1.58E-01
tyrosine catabolic process (GO:0006572)	6	2	.10	+	20.99	6.41E-03	1.58E-01
positive regulation of Fc receptor mediated stimulatory signaling pathway (GO:0060369)	6	2	.10	+	20.99	6.41E-03	1.58E-01
negative regulation of protein depolymerization (GO:1901880)	70	5	1.11	+	4.50	6.40E-03	1.58E-01
deoxyribonucleoside catabolic process (GO:0046121)	6	2	.10	+	20.99	6.41E-03	1.59E-01
regulation of nervous system development (GO:0051960)	443	15	7.03	+	2.13	6.59E-03	1.61E-01
B cell activation (GO:0042113)	168	8	2.67	+	3.00	6.61E-03	1.61E-01
positive regulation of hydrolase activity (GO:0051345)	574	18	9.11	+	1.98	6.62E-03	1.61E-01
response to pH (GO:0009268)	44	4	.70	+	5.73	6.64E-03	1.61E-01
regulation of cysteine-type endopeptidase activity (GO:2000116)	243	10	3.86	+	2.59	6.70E-03	1.62E-01
regulation of lipoprotein lipase activity (GO:0051004)	22	3	.35	+	8.59	6.74E-03	1.62E-01
barbed-end actin filament capping (GO:0051016)	22	3	.35	+	8.59	6.74E-03	1.63E-01
antigen processing and presentation of peptide antigen via MHC class II (GO:0002495)	101	6	1.60	+	3.74	6.73E-03	1.63E-01
cellular response to pH (GO:0071467)	22	3	.35	+	8.59	6.74E-03	1.63E-01
cellular nitrogen compound metabolic process (GO:0034641)	3395	73	53.90	+	1.35	6.80E-03	1.63E-01
negative regulation of phosphorylation (GO:0042326)	395	14	6.27	+	2.23	6.79E-03	1.63E-01
regulation of cytokine production (GO:0001817)	748	22	11.88	+	1.85	6.85E-03	1.64E-01
lymphocyte activation (GO:0046649)	396	14	6.29	+	2.23	6.88E-03	1.65E-01
ATP metabolic process (GO:0046034)	206	9	3.27	+	2.75	6.90E-03	1.65E-01
monocarboxylic acid biosynthetic process (GO:0072330)	170	8	2.70	+	2.96	7.06E-03	1.69E-01
response to steroid hormone (GO:0048545)	285	11	4.53	+	2.43	7.15E-03	1.71E-01
negative regulation of molecular function (GO:0044092)	1137	30	18.05	+	1.66	7.17E-03	1.71E-01
negative regulation of cytokine production (GO:0001818)	286	11	4.54	+	2.42	7.33E-03	1.74E-01
collagen fibril organization (GO:0030199)	103	6	1.64	+	3.67	7.35E-03	1.74E-01
negative regulation of protein-containing complex assembly (GO:0031333)	136	7	2.16	+	3.24	7.33E-03	1.74E-01
generation of neurons (GO:0048699)	1271	33	20.18	+	1.64	7.45E-03	1.76E-01
exploration behavior (GO:0035640)	23	3	.37	+	8.21	7.54E-03	1.78E-01
regulation of cellular response to vascular endothelial growth factor stimulus (GO:1902547)	23	3	.37	+	8.21	7.54E-03	1.78E-01
regulation of immunoglobulin production (GO:0002637)	73	5	1.16	+	4.31	7.53E-03	1.78E-01
neurogenesis (GO:0022008)	1391	35	22.09	+	1.58	7.65E-03	1.80E-01
regulation of mitochondrial outer membrane permeabilization involved in apoptotic signaling pathway (GO:1901028)	46	4	.73	+	5.48	7.67E-03	1.80E-01
liver development (GO:0001889)	138	7	2.19	+	3.19	7.88E-03	1.85E-01
negative regulation of metabolic process (GO:0009892)	3095	67	49.14	+	1.36	8.04E-03	1.88E-01
RIG-I signaling pathway (GO:0039529)	7	2	.11	+	17.99	8.15E-03	1.88E-01
amino-acid betaine transport (GO:0015838)	7	2	.11	+	17.99	8.15E-03	1.89E-01
ribosomal large subunit export from nucleus (GO:0000055)	7	2	.11	+	17.99	8.15E-03	1.89E-01
ribosomal small subunit export from nucleus (GO:0000056)	7	2	.11	+	17.99	8.15E-03	1.89E-01
negative regulation of amyloid precursor protein biosynthetic process (GO:0042985)	7	2	.11	+	17.99	8.15E-03	1.90E-01
negative regulation of protein phosphorylation (GO:0001933)	353	13	5.60	+	2.32	8.23E-03	1.90E-01
substantia nigra development (GO:0021762)	47	4	.75	+	5.36	8.22E-03	1.90E-01
negative regulation of cellular amine metabolic process (GO:0033239)	7	2	.11	+	17.99	8.15E-03	1.90E-01
glucuronate metabolic process (GO:0019585)	24	3	.38	+	7.87	8.38E-03	1.90E-01
regulation of protein lipidation (GO:1903059)	7	2	.11	+	17.99	8.15E-03	1.90E-01
positive regulation of antigen receptor-mediated signaling pathway (GO:0050857)	24	3	.38	+	7.87	8.38E-03	1.90E-01
purine ribonucleoside catabolic process (GO:0046130)	7	2	.11	+	17.99	8.15E-03	1.90E-01
regulation of lipid biosynthetic process (GO:0046890)	175	8	2.78	+	2.88	8.28E-03	1.91E-01
uronic acid metabolic process (GO:0006063)	24	3	.38	+	7.87	8.38E-03	1.91E-01
alditol biosynthetic process (GO:0019401)	7	2	.11	+	17.99	8.15E-03	1.91E-01
regulation of apoptotic signaling pathway (GO:2001233)	354	13	5.62	+	2.31	8.30E-03	1.91E-01
intermediate filament organization (GO:0045109)	24	3	.38	+	7.87	8.38E-03	1.91E-01
alditol metabolic process (GO:0019400)	24	3	.38	+	7.87	8.38E-03	1.91E-01
regulation of plasma lipoprotein particle levels (GO:0097006)	75	5	1.19	+	4.20	8.37E-03	1.91E-01
response to lithium ion (GO:0010226)	24	3	.38	+	7.87	8.38E-03	1.91E-01
viral entry into host cell (GO:0046718)	106	6	1.68	+	3.56	8.35E-03	1.92E-01
negative regulation of protein polymerization (GO:0032272)	75	5	1.19	+	4.20	8.37E-03	1.92E-01
negative regulation of cellular component movement (GO:0051271)	293	11	4.65	+	2.36	8.65E-03	1.96E-01
hepaticobiliary system development (GO:0061008)	141	7	2.24	+	3.13	8.77E-03	1.98E-01
response to ethanol (GO:0045471)	141	7	2.24	+	3.13	8.77E-03	1.98E-01
cellular carbohydrate metabolic process (GO:0044262)	177	8	2.81	+	2.85	8.81E-03	1.99E-01
blood coagulation (GO:0007596)	295	11	4.68	+	2.35	9.06E-03	2.04E-01
retinoid metabolic process (GO:0001523)	108	6	1.71	+	3.50	9.07E-03	2.04E-01
antigen processing and presentation of exogenous peptide antigen (GO:0002478)	178	8	2.83	+	2.83	9.09E-03	2.04E-01
positive regulation of cholesterol efflux (GO:0010875)	25	3	.40	+	7.56	9.28E-03	2.06E-01
protein insertion into mitochondrial membrane (GO:0051204)	25	3	.40	+	7.56	9.28E-03	2.07E-01
wound healing, spreading of cells (GO:0044319)	25	3	.40	+	7.56	9.28E-03	2.07E-01
epiboly involved in wound healing (GO:0090505)	25	3	.40	+	7.56	9.28E-03	2.07E-01
cholesterol efflux (GO:0033344)	25	3	.40	+	7.56	9.28E-03	2.07E-01
aging (GO:0007568)	296	11	4.70	+	2.34	9.27E-03	2.08E-01
cell adhesion mediated by integrin (GO:0033627)	25	3	.40	+	7.56	9.28E-03	2.08E-01
nucleobase-containing small molecule catabolic process (GO:0034656)	49	4	.78	+	5.14	9.40E-03	2.08E-01
morphogenesis of an epithelial sheet (GO:0002011)	49	4	.78	+	5.14	9.40E-03	2.09E-01
coagulation (GO:0050817)	297	11	4.72	+	2.33	9.48E-03	2.10E-01
regulation of regulated secretory pathway (GO:1903305)	144	7	2.29	+	3.06	9.74E-03	2.15E-01
endosome organization (GO:0007032)	78	5	1.24	+	4.04	9.73E-03	2.15E-01
positive regulation of IRE1-mediated unfolded protein response (GO:1903896)	8	2	.13	+	15.75	1.01E-02	2.19E-01
regulation of isomerase activity (GO:0010911)	8	2	.13	+	15.75	1.01E-02	2.20E-01
positive regulation of isomerase activity (GO:0010912)	8	2	.13	+	15.75	1.01E-02	2.20E-01
response to isolation stress (GO:0035900)	8	2	.13	+	15.75	1.01E-02	2.20E-01
negative regulation of triglyceride metabolic process (GO:0090209)	8	2	.13	+	15.75	1.01E-02	2.21E-01
negative regulation of immune effector process (GO:0002698)	111	6	1.76	+	3.40	1.02E-02	2.21E-01
purine nucleoside catabolic process (GO:0006152)	8	2	.13	+	15.75	1.01E-02	2.21E-01
organic cation transport (GO:0015695)	26	3	.41	+	7.27	1.02E-02	2.21E-01
regulation of Cdc42 protein signal transduction (GO:0032489)	8	2	.13	+	15.75	1.01E-02	2.21E-01
regulation of endothelial cell apoptotic process (GO:2000351)	50	4	.79	+	5.04	1.00E-02	2.21E-01
ruffle organization (GO:0031529)	26	3	.41	+	7.27	1.02E-02	2.21E-01
erythrose 4-phosphate/phosphoenolpyruvate family amino acid catabolic process (GO:1902222)	8	2	.13	+	15.75	1.01E-02	2.21E-01
regulation of protein exit from endoplasmic reticulum (GO:0070861)	26	3	.41	+	7.27	1.02E-02	2.22E-01
L-phenylalanine catabolic process (GO:0006559)	8	2	.13	+	15.75	1.01E-02	2.22E-01
animal organ regeneration (GO:0031100)	79	5	1.25	+	3.99	1.02E-02	2.22E-01
folic acid-containing compound metabolic process (GO:0006760)	26	3	.41	+	7.27	1.02E-02	2.22E-01
aldehyde biosynthetic process (GO:0046184)	8	2	.13	+	15.75	1.01E-02	2.22E-01
mitochondrial membrane organization (GO:0007006)	146	7	2.32	+	3.02	1.04E-02	2.24E-01
positive regulation of endopeptidase activity (GO:0010950)	183	8	2.91	+	2.75	1.06E-02	2.27E-01
regulation of extent of cell growth (GO:0061387)	112	6	1.78	+	3.37	1.06E-02	2.28E-01
positive regulation of proteolysis (GO:0045862)	376	13	5.97	+	2.18	1.06E-02	2.28E-01
organelle fusion (GO:0048284)	112	6	1.78	+	3.37	1.06E-02	2.28E-01
negative regulation of protein-containing complex disassembly (GO:0043242)	80	5	1.27	+	3.94	1.07E-02	2.29E-01
organic hydroxy compound catabolic process (GO:1901616)	80	5	1.27	+	3.94	1.07E-02	2.29E-01
negative regulation of response to stimulus (GO:0048585)	1831	43	29.07	+	1.48	1.08E-02	2.30E-01
rRNA processing (GO:0006364)	262	10	4.16	+	2.40	1.08E-02	2.31E-01
macromolecule catabolic process (GO:0009057)	1058	28	16.80	+	1.67	1.11E-02	2.37E-01
aromatic compound biosynthetic process (GO:0019438)	1060	28	16.83	+	1.66	1.12E-02	2.38E-01
response to immobilization stress (GO:0035902)	27	3	.43	+	7.00	1.12E-02	2.38E-01
regulation of nucleobase-containing compound metabolic process (GO:0019219)	4049	46	64.29	-	.72	1.13E-02	2.39E-01
response to axon injury (GO:0048678)	52	4	.83	+	4.84	1.14E-02	2.41E-01
regulation of supramolecular fiber organization (GO:1902903)	382	13	6.07	+	2.14	1.15E-02	2.42E-01
antigen processing and presentation of exogenous antigen (GO:0019884)	186	8	2.95	+	2.71	1.15E-02	2.43E-01
digestion (GO:0007586)	114	6	1.81	+	3.31	1.15E-02	2.43E-01
response to reactive oxygen species (GO:0000302)	186	8	2.95	+	2.71	1.15E-02	2.43E-01
diterpenoid metabolic process (GO:0016101)	114	6	1.81	+	3.31	1.15E-02	2.43E-01
regulation of anatomical structure size (GO:0090066)	514	16	8.16	+	1.96	1.17E-02	2.45E-01
regulation of hydrolase activity (GO:0051336)	1072	28	17.02	+	1.65	1.17E-02	2.46E-01
regulation of leukocyte mediated cytotoxicity (GO:0001910)	82	5	1.30	+	3.84	1.18E-02	2.47E-01
GDP-mannose metabolic process (GO:0019673)	9	2	.14	+	14.00	1.22E-02	2.49E-01
negative regulation of retrograde protein transport, ER to cytosol (GO:1904153)	9	2	.14	+	14.00	1.22E-02	2.49E-01
regulation of nitric oxide mediated signal transduction (GO:0010749)	9	2	.14	+	14.00	1.22E-02	2.50E-01
positive regulation of cholesterol esterification (GO:0010873)	9	2	.14	+	14.00	1.22E-02	2.50E-01
regulation of protein targeting (GO:1903533)	83	5	1.32	+	3.79	1.23E-02	2.50E-01
ribosomal large subunit assembly (GO:0000027)	28	3	.44	+	6.75	1.23E-02	2.50E-01
positive regulation of sequestering of triglyceride (GO:0010890)	9	2	.14	+	14.00	1.22E-02	2.50E-01
response to hexose (GO:0009746)	151	7	2.40	+	2.92	1.23E-02	2.50E-01
fatty acid oxidation (GO:0019395)	83	5	1.32	+	3.79	1.23E-02	2.50E-01
positive regulation of release of cytochrome c from mitochondria (GO:0090200)	28	3	.44	+	6.75	1.23E-02	2.50E-01
polyketide metabolic process (GO:0030638)	9	2	.14	+	14.00	1.22E-02	2.51E-01
regulation of protein localization to cell cortex (GO:1904776)	9	2	.14	+	14.00	1.22E-02	2.51E-01
regulation of cell killing (GO:0031341)	116	6	1.84	+	3.26	1.24E-02	2.51E-01
positive regulation of memory T cell differentiation (GO:0043382)	9	2	.14	+	14.00	1.22E-02	2.51E-01
negative regulation of mitochondrial outer membrane permeabilization involved in apoptotic signaling pathway (GO:1901029)	9	2	.14	+	14.00	1.22E-02	2.51E-01
negative regulation of endothelial cell migration (GO:0010596)	53	4	.84	+	4.75	1.21E-02	2.52E-01
negative regulation of catalytic activity (GO:0043086)	776	22	12.32	+	1.79	1.21E-02	2.52E-01
regulation of neurotransmitter receptor localization to postsynaptic specialization membrane (GO:0098696)	9	2	.14	+	14.00	1.22E-02	2.52E-01
cellular response to nerve growth factor stimulus (GO:1990090)	53	4	.84	+	4.75	1.21E-02	2.52E-01
negative regulation of developmental process (GO:0051093)	879	24	13.96	+	1.72	1.25E-02	2.52E-01
daunorubicin metabolic process (GO:0044597)	9	2	.14	+	14.00	1.22E-02	2.52E-01
neural crest cell migration (GO:0001755)	53	4	.84	+	4.75	1.21E-02	2.52E-01
doxorubicin metabolic process (GO:0044598)	9	2	.14	+	14.00	1.22E-02	2.52E-01
pigment biosynthetic process (GO:0046148)	53	4	.84	+	4.75	1.21E-02	2.53E-01
development of secondary sexual characteristics (GO:0045136)	9	2	.14	+	14.00	1.22E-02	2.53E-01
positive regulation of glutamate secretion (GO:0014049)	9	2	.14	+	14.00	1.22E-02	2.53E-01
cellular detoxification of aldehyde (GO:0110095)	9	2	.14	+	14.00	1.22E-02	2.53E-01
anatomical structure formation involved in morphogenesis (GO:0048646)	883	24	14.02	+	1.71	1.27E-02	2.57E-01
stem cell development (GO:0048864)	84	5	1.33	+	3.75	1.29E-02	2.60E-01
regulation of actin polymerization or depolymerization (GO:0008064)	190	8	3.02	+	2.65	1.29E-02	2.60E-01
calcium ion transmembrane transport (GO:0070588)	190	8	3.02	+	2.65	1.29E-02	2.60E-01
negative regulation of cell migration (GO:0030336)	270	10	4.29	+	2.33	1.31E-02	2.62E-01
cell cycle phase transition (GO:0044770)	270	10	4.29	+	2.33	1.31E-02	2.62E-01
regulation of actin filament length (GO:0030832)	191	8	3.03	+	2.64	1.33E-02	2.66E-01
positive regulation of MAPK cascade (GO:0043410)	525	16	8.34	+	1.92	1.33E-02	2.66E-01
negative regulation of protein transport (GO:0051224)	118	6	1.87	+	3.20	1.34E-02	2.67E-01
vesicle-mediated transport to the plasma membrane (GO:0098876)	118	6	1.87	+	3.20	1.34E-02	2.67E-01
response to lipoprotein particle (GO:0055094)	29	3	.46	+	6.52	1.34E-02	2.67E-01
hydrogen peroxide catabolic process (GO:0042744)	29	3	.46	+	6.52	1.34E-02	2.68E-01
regulation of T cell mediated immunity (GO:0002709)	85	5	1.35	+	3.70	1.35E-02	2.68E-01
negative regulation of intracellular transport (GO:0032387)	55	4	.87	+	4.58	1.36E-02	2.70E-01
rRNA metabolic process (GO:0016072)	272	10	4.32	+	2.32	1.37E-02	2.71E-01
B cell differentiation (GO:0030183)	119	6	1.89	+	3.18	1.39E-02	2.74E-01
regulation of cell shape (GO:0008360)	155	7	2.46	+	2.84	1.39E-02	2.76E-01
antigen processing and presentation of peptide antigen (GO:0048002)	193	8	3.06	+	2.61	1.40E-02	2.77E-01
negative regulation of nucleobase-containing compound metabolic process (GO:0045934)	1528	13	24.26	-	.54	1.40E-02	2.77E-01
Golgi to plasma membrane protein transport (GO:0043001)	30	3	.48	+	6.30	1.46E-02	2.78E-01
establishment of protein localization to mitochondrial membrane (GO:0090151)	30	3	.48	+	6.30	1.46E-02	2.78E-01
high-density lipoprotein particle clearance (GO:0034384)	10	2	.16	+	12.60	1.45E-02	2.78E-01
cellular response to interleukin-4 (GO:0071353)	30	3	.48	+	6.30	1.46E-02	2.78E-01
intestinal cholesterol absorption (GO:0030299)	10	2	.16	+	12.60	1.45E-02	2.78E-01
Golgi vesicle transport (GO:0048193)	398	13	6.32	+	2.06	1.46E-02	2.78E-01
negative regulation of endothelial cell apoptotic process (GO:2000352)	30	3	.48	+	6.30	1.46E-02	2.79E-01
cytoplasmic pattern recognition receptor signaling pathway in response to virus (GO:0039528)	10	2	.16	+	12.60	1.45E-02	2.79E-01
regulation of RNA metabolic process (GO:0051252)	3782	43	60.05	-	.72	1.41E-02	2.79E-01
phospholipid metabolic process (GO:0006644)	398	13	6.32	+	2.06	1.46E-02	2.79E-01
primary alcohol metabolic process (GO:0034308)	87	5	1.38	+	3.62	1.47E-02	2.79E-01
face morphogenesis (GO:0060325)	30	3	.48	+	6.30	1.46E-02	2.79E-01
purine nucleobase biosynthetic process (GO:0009113)	10	2	.16	+	12.60	1.45E-02	2.79E-01
lipid oxidation (GO:0034440)	87	5	1.38	+	3.62	1.47E-02	2.79E-01
response to monosaccharide (GO:0034284)	157	7	2.49	+	2.81	1.48E-02	2.79E-01
aminoglycoside antibiotic metabolic process (GO:0030647)	10	2	.16	+	12.60	1.45E-02	2.79E-01
iron ion homeostasis (GO:0055072)	87	5	1.38	+	3.62	1.47E-02	2.79E-01
positive regulation of cysteine-type endopeptidase activity (GO:2001056)	157	7	2.49	+	2.81	1.48E-02	2.80E-01
mitophagy (GO:0000423)	10	2	.16	+	12.60	1.45E-02	2.80E-01
modulation of process of other organism involved in symbiotic interaction (GO:0051817)	121	6	1.92	+	3.12	1.49E-02	2.80E-01
vesicle fusion (GO:0006906)	87	5	1.38	+	3.62	1.47E-02	2.80E-01
gastrulation (GO:0007369)	157	7	2.49	+	2.81	1.48E-02	2.80E-01
regulation of small GTPase mediated signal transduction (GO:0051056)	348	12	5.53	+	2.17	1.48E-02	2.80E-01
cell morphogenesis (GO:0000902)	715	20	11.35	+	1.76	1.49E-02	2.80E-01
response to fructose (GO:0009750)	10	2	.16	+	12.60	1.45E-02	2.80E-01
long-chain fatty acid import into cell (GO:0044539)	10	2	.16	+	12.60	1.45E-02	2.80E-01
negative regulation of protein exit from endoplasmic reticulum (GO:0070862)	10	2	.16	+	12.60	1.45E-02	2.81E-01
positive regulation of T cell mediated immunity (GO:0002711)	56	4	.89	+	4.50	1.44E-02	2.81E-01
lipid import into cell (GO:0140354)	10	2	.16	+	12.60	1.45E-02	2.81E-01
negative regulation of proteolysis (GO:0045861)	345	12	5.48	+	2.19	1.43E-02	2.81E-01
lipid localization (GO:0010876)	349	12	5.54	+	2.17	1.50E-02	2.81E-01
regulation of actin filament depolymerization (GO:0030834)	56	4	.89	+	4.50	1.44E-02	2.81E-01
vagina development (GO:0060068)	10	2	.16	+	12.60	1.45E-02	2.81E-01
xenobiotic detoxification by transmembrane export across the plasma membrane (GO:1990961)	10	2	.16	+	12.60	1.45E-02	2.82E-01
response to nerve growth factor (GO:1990089)	56	4	.89	+	4.50	1.44E-02	2.82E-01
cell morphogenesis involved in differentiation (GO:0000904)	559	17	8.88	+	1.92	1.50E-02	2.82E-01
negative regulation of T cell mediated cytotoxicity (GO:0001915)	10	2	.16	+	12.60	1.45E-02	2.82E-01
positive regulation of leukocyte mediated cytotoxicity (GO:0001912)	56	4	.89	+	4.50	1.44E-02	2.82E-01
negative regulation of cytoskeleton organization (GO:0051494)	156	7	2.48	+	2.83	1.44E-02	2.82E-01
odontogenesis (GO:0042476)	120	6	1.91	+	3.15	1.44E-02	2.82E-01
regulation of ER-associated ubiquitin-dependent protein catabolic process (GO:1903069)	10	2	.16	+	12.60	1.45E-02	2.82E-01
adenosine metabolic process (GO:0046085)	10	2	.16	+	12.60	1.45E-02	2.83E-01
protein homotetramerization (GO:0051289)	57	4	.91	+	4.42	1.52E-02	2.85E-01
regulation of protein polymerization (GO:0032271)	236	9	3.75	+	2.40	1.53E-02	2.86E-01
negative regulation of establishment of protein localization (GO:1904950)	122	6	1.94	+	3.10	1.54E-02	2.88E-01
positive regulation of protein metabolic process (GO:0051247)	1562	37	24.80	+	1.49	1.55E-02	2.90E-01
heterocycle biosynthetic process (GO:0018130)	1049	27	16.66	+	1.62	1.57E-02	2.92E-01
blood vessel endothelial cell migration (GO:0043534)	31	3	.49	+	6.09	1.58E-02	2.93E-01
positive regulation of multicellular organism growth (GO:0040018)	31	3	.49	+	6.09	1.58E-02	2.94E-01
positive regulation of protein targeting to membrane (GO:0090314)	31	3	.49	+	6.09	1.58E-02	2.94E-01
cellular response to lipoprotein particle stimulus (GO:0071402)	31	3	.49	+	6.09	1.58E-02	2.94E-01
positive regulation of epidermis development (GO:0045684)	31	3	.49	+	6.09	1.58E-02	2.95E-01
cellular response to reactive oxygen species (GO:0034614)	123	6	1.95	+	3.07	1.60E-02	2.95E-01
transition metal ion transport (GO:0000041)	123	6	1.95	+	3.07	1.60E-02	2.95E-01
negative regulation of small GTPase mediated signal transduction (GO:0051058)	58	4	.92	+	4.34	1.61E-02	2.95E-01
vitamin metabolic process (GO:0006766)	123	6	1.95	+	3.07	1.60E-02	2.96E-01
fatty acid beta-oxidation (GO:0006635)	58	4	.92	+	4.34	1.61E-02	2.96E-01
fatty acid catabolic process (GO:0009062)	89	5	1.41	+	3.54	1.60E-02	2.96E-01
DNA damage response, signal transduction by p53 class mediator resulting in cell cycle arrest (GO:0006977)	58	4	.92	+	4.34	1.61E-02	2.96E-01
cell projection assembly (GO:0030031)	488	15	7.75	+	1.94	1.62E-02	2.98E-01
protein-DNA complex subunit organization (GO:0071824)	296	0	4.70	-	< 0.01	1.63E-02	2.99E-01
fatty acid biosynthetic process (GO:0006633)	124	6	1.97	+	3.05	1.65E-02	3.03E-01
chylomicron assembly (GO:0034378)	11	2	.17	+	11.45	1.70E-02	3.05E-01
positive regulation of mitochondrion organization (GO:0010822)	90	5	1.43	+	3.50	1.67E-02	3.05E-01
hepatocyte apoptotic process (GO:0097284)	11	2	.17	+	11.45	1.70E-02	3.05E-01
regulation of anion transport (GO:0044070)	90	5	1.43	+	3.50	1.67E-02	3.05E-01
negative regulation of transcription by competitive promoter binding (GO:0010944)	11	2	.17	+	11.45	1.70E-02	3.05E-01
protein tetramerization (GO:0051262)	90	5	1.43	+	3.50	1.67E-02	3.05E-01
deoxyribonucleoside metabolic process (GO:0009120)	11	2	.17	+	11.45	1.70E-02	3.06E-01
regulation of axonogenesis (GO:0050770)	161	7	2.56	+	2.74	1.67E-02	3.06E-01
protein-lipid complex remodeling (GO:0034368)	32	3	.51	+	5.90	1.71E-02	3.06E-01
negative regulation of synapse organization (GO:1905809)	11	2	.17	+	11.45	1.70E-02	3.06E-01
plasma lipoprotein particle remodeling (GO:0034369)	32	3	.51	+	5.90	1.71E-02	3.06E-01
regulation of RNA biosynthetic process (GO:2001141)	3480	39	55.25	-	.71	1.69E-02	3.06E-01
regulation of nucleic acid-templated transcription (GO:1903506)	3475	39	55.17	-	.71	1.69E-02	3.06E-01
synaptic vesicle endosomal processing (GO:0099532)	11	2	.17	+	11.45	1.70E-02	3.06E-01
regulation of vascular endothelial growth factor production (GO:0010574)	32	3	.51	+	5.90	1.71E-02	3.06E-01
positive regulation of leukocyte cell-cell adhesion (GO:1903039)	240	9	3.81	+	2.36	1.68E-02	3.06E-01
regulation of transcription, DNA-templated (GO:0006355)	3474	39	55.16	-	.71	1.68E-02	3.06E-01
disaccharide metabolic process (GO:0005984)	11	2	.17	+	11.45	1.70E-02	3.07E-01
protein deglycosylation (GO:0006517)	32	3	.51	+	5.90	1.71E-02	3.07E-01
regulation of catabolic process (GO:0009894)	1066	27	16.93	+	1.60	1.71E-02	3.07E-01
regulation of response to wounding (GO:1903034)	162	7	2.57	+	2.72	1.72E-02	3.07E-01
erythrose 4-phosphate/phosphoenolpyruvate family amino acid metabolic process (GO:1902221)	11	2	.17	+	11.45	1.70E-02	3.07E-01
L-phenylalanine metabolic process (GO:0006558)	11	2	.17	+	11.45	1.70E-02	3.07E-01
organelle membrane fusion (GO:0090174)	91	5	1.44	+	3.46	1.74E-02	3.10E-01
DNA conformation change (GO:0071103)	312	0	4.95	-	< 0.01	1.74E-02	3.10E-01
regulation of protein depolymerization (GO:1901879)	91	5	1.44	+	3.46	1.74E-02	3.10E-01
regulation of secretion by cell (GO:1903530)	581	17	9.22	+	1.84	1.75E-02	3.11E-01
positive regulation of cellular protein metabolic process (GO:0032270)	1474	35	23.40	+	1.50	1.76E-02	3.12E-01
epithelial cell development (GO:0002064)	202	8	3.21	+	2.49	1.78E-02	3.15E-01
regulation of dendritic spine development (GO:0060998)	60	4	.95	+	4.20	1.79E-02	3.15E-01
regulation of cell junction assembly (GO:1901888)	202	8	3.21	+	2.49	1.78E-02	3.15E-01
negative regulation of actin filament polymerization (GO:0030837)	60	4	.95	+	4.20	1.79E-02	3.15E-01
vesicle docking (GO:0048278)	60	4	.95	+	4.20	1.79E-02	3.16E-01
regulation of DNA-binding transcription factor activity (GO:0051090)	435	14	6.91	+	2.03	1.80E-02	3.17E-01
regulation of phagocytosis (GO:0050764)	92	5	1.46	+	3.42	1.81E-02	3.19E-01
regulation of membrane potential (GO:0042391)	437	14	6.94	+	2.02	1.83E-02	3.21E-01
regulation of cellular component biogenesis (GO:0044087)	974	25	15.46	+	1.62	1.85E-02	3.23E-01
regulation of cholesterol metabolic process (GO:0090181)	33	3	.52	+	5.73	1.85E-02	3.23E-01
response to interleukin-4 (GO:0070670)	33	3	.52	+	5.73	1.85E-02	3.23E-01
regulation of superoxide metabolic process (GO:0090322)	33	3	.52	+	5.73	1.85E-02	3.24E-01
regulation of cellular process (GO:0050794)	11351	202	180.23	+	1.12	1.84E-02	3.24E-01
cholesterol transport (GO:0030301)	61	4	.97	+	4.13	1.88E-02	3.28E-01
long-chain fatty acid transport (GO:0015909)	61	4	.97	+	4.13	1.88E-02	3.28E-01
mammary gland development (GO:0030879)	128	6	2.03	+	2.95	1.89E-02	3.29E-01
circulatory system development (GO:0072359)	877	23	13.92	+	1.65	1.91E-02	3.32E-01
negative regulation of RNA metabolic process (GO:0051253)	1408	12	22.36	-	.54	1.98E-02	3.34E-01
regulation of protein folding (GO:1903332)	12	2	.19	+	10.50	1.96E-02	3.35E-01
transcription, DNA-templated (GO:0006351)	530	2	8.42	-	.24	1.96E-02	3.35E-01
cellular carbohydrate biosynthetic process (GO:0034637)	62	4	.98	+	4.06	1.98E-02	3.35E-01
positive regulation of viral entry into host cell (GO:0046598)	12	2	.19	+	10.50	1.96E-02	3.35E-01
protein-containing complex remodeling (GO:0034367)	34	3	.54	+	5.56	1.99E-02	3.35E-01
ribosome assembly (GO:0042255)	62	4	.98	+	4.06	1.98E-02	3.35E-01
nucleic acid-templated transcription (GO:0097659)	531	2	8.43	-	.24	1.97E-02	3.35E-01
negative regulation of protein import into nucleus (GO:0042308)	12	2	.19	+	10.50	1.96E-02	3.35E-01
positive regulation of phosphatase activity (GO:0010922)	34	3	.54	+	5.56	1.99E-02	3.35E-01
regulation of sterol transport (GO:0032371)	62	4	.98	+	4.06	1.98E-02	3.35E-01
positive regulation of cell growth (GO:0030307)	166	7	2.64	+	2.66	1.93E-02	3.36E-01
regulation of I-kappaB kinase/NF-kappaB signaling (GO:0043122)	246	9	3.91	+	2.30	1.93E-02	3.36E-01
negative regulation of protein import (GO:1904590)	12	2	.19	+	10.50	1.96E-02	3.36E-01
nervous system development (GO:0007399)	2218	49	35.22	+	1.39	1.93E-02	3.36E-01
regulation of cholesterol transport (GO:0032374)	62	4	.98	+	4.06	1.98E-02	3.36E-01
positive regulation by symbiont of entry into host (GO:0075294)	12	2	.19	+	10.50	1.96E-02	3.36E-01
fatty acid derivative biosynthetic process (GO:1901570)	62	4	.98	+	4.06	1.98E-02	3.36E-01
intestinal lipid absorption (GO:0098856)	12	2	.19	+	10.50	1.96E-02	3.36E-01
positive regulation of osteoblast differentiation (GO:0045669)	62	4	.98	+	4.06	1.98E-02	3.37E-01
negative regulation of macromolecule metabolic process (GO:0010605)	2880	61	45.73	+	1.33	1.98E-02	3.37E-01
protein oxidation (GO:0018158)	12	2	.19	+	10.50	1.96E-02	3.37E-01
cellular response to acidic pH (GO:0071468)	12	2	.19	+	10.50	1.96E-02	3.37E-01
collagen-activated tyrosine kinase receptor signaling pathway (GO:0038063)	12	2	.19	+	10.50	1.96E-02	3.37E-01
L-serine metabolic process (GO:0006563)	12	2	.19	+	10.50	1.96E-02	3.38E-01
negative regulation of collagen biosynthetic process (GO:0032966)	12	2	.19	+	10.50	1.96E-02	3.38E-01
regulation of osteoclast development (GO:2001204)	12	2	.19	+	10.50	1.96E-02	3.39E-01
positive regulation of vasculogenesis (GO:2001214)	12	2	.19	+	10.50	1.96E-02	3.39E-01
phospholipid efflux (GO:0033700)	12	2	.19	+	10.50	1.96E-02	3.39E-01
ciliary basal body-plasma membrane docking (GO:0097711)	95	5	1.51	+	3.31	2.04E-02	3.44E-01
neuron projection development (GO:0031175)	691	19	10.97	+	1.73	2.05E-02	3.45E-01
negative regulation of endopeptidase activity (GO:0010951)	249	9	3.95	+	2.28	2.07E-02	3.47E-01
receptor-mediated endocytosis (GO:0006898)	249	9	3.95	+	2.28	2.07E-02	3.47E-01
positive regulation of phagocytosis (GO:0050766)	63	4	1.00	+	4.00	2.08E-02	3.49E-01
cell surface receptor signaling pathway (GO:0007166)	2495	54	39.61	+	1.36	2.10E-02	3.52E-01
regulation of protein-containing complex assembly (GO:0043254)	455	14	7.22	+	1.94	2.11E-02	3.54E-01
regulation of steroid metabolic process (GO:0019218)	96	5	1.52	+	3.28	2.12E-02	3.55E-01
T cell proliferation (GO:0042098)	35	3	.56	+	5.40	2.13E-02	3.56E-01
electron transport chain (GO:0022900)	170	7	2.70	+	2.59	2.16E-02	3.59E-01
regulation of transferase activity (GO:0051338)	1033	26	16.40	+	1.59	2.15E-02	3.60E-01
regulation of synapse organization (GO:0050807)	210	8	3.33	+	2.40	2.17E-02	3.62E-01
regulation of tau-protein kinase activity (GO:1902947)	13	2	.21	+	9.69	2.24E-02	3.65E-01
very-low-density lipoprotein particle assembly (GO:0034379)	13	2	.21	+	9.69	2.24E-02	3.65E-01
cation transport (GO:0006812)	824	22	13.08	+	1.68	2.20E-02	3.66E-01
high-density lipoprotein particle assembly (GO:0034380)	13	2	.21	+	9.69	2.24E-02	3.66E-01
response to cAMP (GO:0051591)	97	5	1.54	+	3.25	2.20E-02	3.66E-01
exit from mitosis (GO:0010458)	13	2	.21	+	9.69	2.24E-02	3.66E-01
regulation of retrograde protein transport, ER to cytosol (GO:1904152)	13	2	.21	+	9.69	2.24E-02	3.67E-01
response to mercury ion (GO:0046689)	13	2	.21	+	9.69	2.24E-02	3.67E-01
negative regulation of collagen metabolic process (GO:0010713)	13	2	.21	+	9.69	2.24E-02	3.67E-01
quaternary ammonium group transport (GO:0015697)	13	2	.21	+	9.69	2.24E-02	3.68E-01
ribosomal subunit export from nucleus (GO:0000054)	13	2	.21	+	9.69	2.24E-02	3.68E-01
negative regulation of lipopolysaccharide-mediated signaling pathway (GO:0031665)	13	2	.21	+	9.69	2.24E-02	3.69E-01
negative regulation of cellular response to vascular endothelial growth factor stimulus (GO:1902548)	13	2	.21	+	9.69	2.24E-02	3.69E-01
cellular response to aldehyde (GO:0110096)	13	2	.21	+	9.69	2.24E-02	3.69E-01
cellular response to epinephrine stimulus (GO:0071872)	13	2	.21	+	9.69	2.24E-02	3.70E-01
tertiary alcohol metabolic process (GO:1902644)	13	2	.21	+	9.69	2.24E-02	3.70E-01
aldehyde catabolic process (GO:0046185)	13	2	.21	+	9.69	2.24E-02	3.70E-01
removal of superoxide radicals (GO:0019430)	13	2	.21	+	9.69	2.24E-02	3.71E-01
regulation of triglyceride metabolic process (GO:0090207)	36	3	.57	+	5.25	2.28E-02	3.71E-01
positive regulation of leukocyte mediated immunity (GO:0002705)	134	6	2.13	+	2.82	2.29E-02	3.71E-01
negative regulation of MAPK cascade (GO:0043409)	172	7	2.73	+	2.56	2.28E-02	3.71E-01
ribosome localization (GO:0033750)	13	2	.21	+	9.69	2.24E-02	3.71E-01
astrocyte development (GO:0014002)	36	3	.57	+	5.25	2.28E-02	3.71E-01
modulation by host of symbiont process (GO:0051851)	65	4	1.03	+	3.88	2.29E-02	3.71E-01
transferrin transport (GO:0033572)	36	3	.57	+	5.25	2.28E-02	3.72E-01
head morphogenesis (GO:0060323)	36	3	.57	+	5.25	2.28E-02	3.72E-01
positive regulation of cell death (GO:0010942)	638	18	10.13	+	1.78	2.30E-02	3.73E-01
regulation of secretion (GO:0051046)	639	18	10.15	+	1.77	2.31E-02	3.74E-01
organophosphate ester transport (GO:0015748)	135	6	2.14	+	2.80	2.36E-02	3.81E-01
response to acid chemical (GO:0001101)	135	6	2.14	+	2.80	2.36E-02	3.81E-01
regulation of synapse assembly (GO:0051963)	99	5	1.57	+	3.18	2.37E-02	3.82E-01
regulation of lipase activity (GO:0060191)	99	5	1.57	+	3.18	2.37E-02	3.83E-01
regulation of actin filament polymerization (GO:0030833)	174	7	2.76	+	2.53	2.40E-02	3.85E-01
positive regulation of nucleocytoplasmic transport (GO:0046824)	66	4	1.05	+	3.82	2.40E-02	3.85E-01
learning or memory (GO:0007611)	256	9	4.06	+	2.21	2.40E-02	3.85E-01
regulation of antigen receptor-mediated signaling pathway (GO:0050854)	66	4	1.05	+	3.82	2.40E-02	3.85E-01
neural nucleus development (GO:0048857)	66	4	1.05	+	3.82	2.40E-02	3.86E-01
alpha-amino acid biosynthetic process (GO:1901607)	66	4	1.05	+	3.82	2.40E-02	3.86E-01
positive regulation of sterol transport (GO:0032373)	37	3	.59	+	5.11	2.44E-02	3.89E-01
positive regulation of cholesterol transport (GO:0032376)	37	3	.59	+	5.11	2.44E-02	3.89E-01
post-Golgi vesicle-mediated transport (GO:0006892)	136	6	2.16	+	2.78	2.43E-02	3.89E-01
regulation of protein targeting to membrane (GO:0090313)	37	3	.59	+	5.11	2.44E-02	3.89E-01
actin filament capping (GO:0051693)	37	3	.59	+	5.11	2.44E-02	3.90E-01
regulation of amino acid transport (GO:0051955)	37	3	.59	+	5.11	2.44E-02	3.90E-01
negative regulation of membrane potential (GO:0045837)	14	2	.22	+	9.00	2.53E-02	3.96E-01
negative regulation of glycoprotein biosynthetic process (GO:0010561)	14	2	.22	+	9.00	2.53E-02	3.96E-01
positive regulation of fibroblast migration (GO:0010763)	14	2	.22	+	9.00	2.53E-02	3.97E-01
regulation of triglyceride catabolic process (GO:0010896)	14	2	.22	+	9.00	2.53E-02	3.97E-01
positive regulation of endoplasmic reticulum unfolded protein response (GO:1900103)	14	2	.22	+	9.00	2.53E-02	3.97E-01
regulation of amyloid precursor protein biosynthetic process (GO:0042984)	14	2	.22	+	9.00	2.53E-02	3.98E-01
hepatocyte differentiation (GO:0070365)	14	2	.22	+	9.00	2.53E-02	3.98E-01
acetyl-CoA biosynthetic process (GO:0006085)	14	2	.22	+	9.00	2.53E-02	3.99E-01
actin crosslink formation (GO:0051764)	14	2	.22	+	9.00	2.53E-02	3.99E-01
antiviral innate immune response (GO:0140374)	14	2	.22	+	9.00	2.53E-02	3.99E-01
rRNA-containing ribonucleoprotein complex export from nucleus (GO:0071428)	14	2	.22	+	9.00	2.53E-02	4.00E-01
negative regulation of lymphocyte migration (GO:2000402)	14	2	.22	+	9.00	2.53E-02	4.00E-01
plasma membrane bounded cell projection assembly (GO:0120031)	472	14	7.49	+	1.87	2.52E-02	4.00E-01
positive regulation by host of viral process (GO:0044794)	14	2	.22	+	9.00	2.53E-02	4.01E-01
positive regulation of phospholipid transport (GO:2001140)	14	2	.22	+	9.00	2.53E-02	4.01E-01
positive regulation of cellular senescence (GO:2000774)	14	2	.22	+	9.00	2.53E-02	4.01E-01
production of molecular mediator involved in inflammatory response (GO:0002532)	14	2	.22	+	9.00	2.53E-02	4.02E-01
regulation of phosphorylation (GO:0042325)	1391	33	22.09	+	1.49	2.59E-02	4.05E-01
positive regulation of glucose import (GO:0046326)	38	3	.60	+	4.97	2.60E-02	4.05E-01
pteridine-containing compound metabolic process (GO:0042558)	38	3	.60	+	4.97	2.60E-02	4.06E-01
positive regulation of response to endoplasmic reticulum stress (GO:1905898)	38	3	.60	+	4.97	2.60E-02	4.06E-01
positive regulation of amine transport (GO:0051954)	38	3	.60	+	4.97	2.60E-02	4.07E-01
regulation of cysteine-type endopeptidase activity involved in apoptotic process (GO:0043281)	218	8	3.46	+	2.31	2.62E-02	4.08E-01
negative regulation of epithelial cell migration (GO:0010633)	68	4	1.08	+	3.70	2.63E-02	4.08E-01
cellular response to drug (GO:0035690)	68	4	1.08	+	3.70	2.63E-02	4.08E-01
negative regulation of leukocyte differentiation (GO:1902106)	102	5	1.62	+	3.09	2.64E-02	4.10E-01
regulation of leukocyte differentiation (GO:1902105)	281	10	4.46	+	2.24	2.66E-02	4.12E-01
positive regulation of cysteine-type endopeptidase activity involved in apoptotic process (GO:0043280)	139	6	2.21	+	2.72	2.66E-02	4.12E-01
cellular response to chemical stress (GO:0062197)	282	10	4.48	+	2.23	2.68E-02	4.14E-01
asymmetric cell division (GO:0008356)	16	2	.25	+	7.87	3.16E-02	4.14E-01
negative regulation of lipoprotein lipid oxidation (GO:0060588)	1	1	.02	+	62.98	3.10E-02	4.14E-01
positive regulation of adaptive immune response based on somatic recombination of immune receptors built from immunoglobulin superfamily domains (GO:0002824)	107	5	1.70	+	2.94	3.13E-02	4.14E-01
regulation of extracellular matrix disassembly (GO:0010715)	16	2	.25	+	7.87	3.16E-02	4.14E-01
pentitol metabolic process (GO:0019519)	1	1	.02	+	62.98	3.10E-02	4.15E-01
female sex differentiation (GO:0046660)	107	5	1.70	+	2.94	3.13E-02	4.15E-01
protein kinase A signaling (GO:0010737)	16	2	.25	+	7.87	3.16E-02	4.15E-01
regulation of cell size (GO:0008361)	185	7	2.94	+	2.38	3.17E-02	4.15E-01
pentitol catabolic process (GO:0019527)	1	1	.02	+	62.98	3.10E-02	4.15E-01
female genitalia development (GO:0030540)	16	2	.25	+	7.87	3.16E-02	4.15E-01
establishment of protein localization to extracellular region (GO:0035592)	107	5	1.70	+	2.94	3.13E-02	4.15E-01
phosphatidylserine exposure on blood platelet (GO:0097045)	1	1	.02	+	62.98	3.10E-02	4.15E-01
coenzyme A metabolic process (GO:0015936)	16	2	.25	+	7.87	3.16E-02	4.16E-01
regulation of oxidoreductase activity (GO:0051341)	107	5	1.70	+	2.94	3.13E-02	4.16E-01
regulation of leukocyte mediated immunity (GO:0002703)	226	8	3.59	+	2.23	3.13E-02	4.16E-01
positive regulation of early endosome to recycling endosome transport (GO:1902955)	1	1	.02	+	62.98	3.10E-02	4.16E-01
negative regulation of response to reactive oxygen species (GO:1901032)	16	2	.25	+	7.87	3.16E-02	4.16E-01
positive regulation of lipid localization (GO:1905954)	107	5	1.70	+	2.94	3.13E-02	4.16E-01
cognition (GO:0050890)	298	10	4.73	+	2.11	3.12E-02	4.16E-01
regulation of chemotaxis (GO:0050920)	226	8	3.59	+	2.23	3.13E-02	4.16E-01
positive regulation of dendritic spine development (GO:0060999)	41	3	.65	+	4.61	3.13E-02	4.16E-01
negative regulation of neurofibrillary tangle assembly (GO:1902997)	1	1	.02	+	62.98	3.10E-02	4.16E-01
positive regulation of cell aging (GO:0090343)	16	2	.25	+	7.87	3.16E-02	4.16E-01
hydrogen peroxide metabolic process (GO:0042743)	41	3	.65	+	4.61	3.13E-02	4.16E-01
negative regulation of phospholipid efflux (GO:1902999)	1	1	.02	+	62.98	3.10E-02	4.17E-01
regulation of glutamate secretion (GO:0014048)	16	2	.25	+	7.87	3.16E-02	4.17E-01
cellular iron ion homeostasis (GO:0006879)	72	4	1.14	+	3.50	3.12E-02	4.17E-01
positive regulation of organic acid transport (GO:0032892)	41	3	.65	+	4.61	3.13E-02	4.17E-01
response to lipoic acid (GO:1903442)	1	1	.02	+	62.98	3.10E-02	4.17E-01
response to epinephrine (GO:0071871)	16	2	.25	+	7.87	3.16E-02	4.17E-01
negative regulation of hydrogen peroxide-induced cell death (GO:1903206)	16	2	.25	+	7.87	3.16E-02	4.17E-01
lactate catabolic process (GO:1903457)	1	1	.02	+	62.98	3.10E-02	4.17E-01
organophosphate catabolic process (GO:0046434)	145	6	2.30	+	2.61	3.16E-02	4.17E-01
negative regulation of lipoprotein oxidation (GO:0034443)	1	1	.02	+	62.98	3.10E-02	4.18E-01
positive regulation of intestinal epithelial structure maintenance (GO:0060731)	1	1	.02	+	62.98	3.10E-02	4.18E-01
response to selenite ion (GO:0072714)	1	1	.02	+	62.98	3.10E-02	4.18E-01
cellular response to selenite ion (GO:0072715)	1	1	.02	+	62.98	3.10E-02	4.19E-01
regulation of apoptosis involved in tissue homeostasis (GO:0060785)	1	1	.02	+	62.98	3.10E-02	4.19E-01
establishment of epithelial cell apical/basal polarity involved in camera-type eye morphogenesis (GO:0003412)	1	1	.02	+	62.98	3.10E-02	4.19E-01
endocytosis (GO:0006897)	569	16	9.03	+	1.77	2.72E-02	4.20E-01
regulation of protein insertion into mitochondrial outer membrane (GO:1903636)	1	1	.02	+	62.98	3.10E-02	4.20E-01
positive regulation of protein insertion into mitochondrial outer membrane (GO:1903638)	1	1	.02	+	62.98	3.10E-02	4.20E-01
positive regulation of glutathione biosynthetic process (GO:1903788)	1	1	.02	+	62.98	3.10E-02	4.20E-01
regulation of VCP-NPL4-UFD1 AAA ATPase complex assembly (GO:1904239)	1	1	.02	+	62.98	3.10E-02	4.21E-01
negative regulation of VCP-NPL4-UFD1 AAA ATPase complex assembly (GO:1904240)	1	1	.02	+	62.98	3.10E-02	4.21E-01
phytosteroid metabolic process (GO:0016128)	1	1	.02	+	62.98	3.10E-02	4.22E-01
negative regulation of cell motility (GO:2000146)	285	10	4.53	+	2.21	2.74E-02	4.22E-01
positive regulation of T cell activation (GO:0050870)	220	8	3.49	+	2.29	2.74E-02	4.22E-01
phytosteroid biosynthetic process (GO:0016129)	1	1	.02	+	62.98	3.10E-02	4.22E-01
fatty acid transport (GO:0015908)	69	4	1.10	+	3.65	2.75E-02	4.22E-01
regulation of cell activation (GO:0050865)	664	18	10.54	+	1.71	2.74E-02	4.22E-01
brassinosteroid metabolic process (GO:0016131)	1	1	.02	+	62.98	3.10E-02	4.22E-01
platelet activation (GO:0030168)	140	6	2.22	+	2.70	2.74E-02	4.23E-01
brassinosteroid biosynthetic process (GO:0016132)	1	1	.02	+	62.98	3.10E-02	4.23E-01
chemical homeostasis (GO:0048878)	1139	28	18.08	+	1.55	2.76E-02	4.23E-01
reactive gliosis (GO:0150103)	1	1	.02	+	62.98	3.10E-02	4.23E-01
transition metal ion homeostasis (GO:0055076)	140	6	2.22	+	2.70	2.74E-02	4.23E-01
positive regulation of glutamate neurotransmitter secretion in response to membrane depolarization (GO:0061646)	1	1	.02	+	62.98	3.10E-02	4.23E-01
regulation of cytoskeleton organization (GO:0051493)	526	15	8.35	+	1.80	3.24E-02	4.24E-01
regulation of arginine catabolic process (GO:1900081)	1	1	.02	+	62.98	3.10E-02	4.24E-01
plasma lipoprotein particle clearance (GO:0034381)	39	3	.62	+	4.84	2.77E-02	4.24E-01
negative regulation of arginine catabolic process (GO:1900082)	1	1	.02	+	62.98	3.10E-02	4.24E-01
lipid storage (GO:0019915)	39	3	.62	+	4.84	2.77E-02	4.24E-01
regulation of transport across blood-brain barrier (GO:0150200)	1	1	.02	+	62.98	3.10E-02	4.24E-01
regulation of nervous system process (GO:0031644)	146	6	2.32	+	2.59	3.25E-02	4.25E-01
positive regulation of cell killing (GO:0031343)	73	4	1.16	+	3.45	3.26E-02	4.25E-01
regulation of phospholipid metabolic process (GO:1903725)	39	3	.62	+	4.84	2.77E-02	4.25E-01
lipoprotein catabolic process (GO:0042159)	15	2	.24	+	8.40	2.84E-02	4.25E-01
positive regulation of transport across blood-brain barrier (GO:0150201)	1	1	.02	+	62.98	3.10E-02	4.25E-01
cellular response to hydrogen peroxide (GO:0070301)	73	4	1.16	+	3.45	3.26E-02	4.25E-01
nucleotide-sugar metabolic process (GO:0009225)	39	3	.62	+	4.84	2.77E-02	4.25E-01
regulation of IRE1-mediated unfolded protein response (GO:1903894)	15	2	.24	+	8.40	2.84E-02	4.25E-01
negative regulation of transport across blood-brain barrier (GO:0150202)	1	1	.02	+	62.98	3.10E-02	4.25E-01
positive regulation of reactive oxygen species metabolic process (GO:2000379)	73	4	1.16	+	3.45	3.26E-02	4.25E-01
regulation of sequestering of triglyceride (GO:0010889)	15	2	.24	+	8.40	2.84E-02	4.26E-01
response to tetrahydrofolate (GO:1904481)	1	1	.02	+	62.98	3.10E-02	4.26E-01
fatty acid homeostasis (GO:0055089)	15	2	.24	+	8.40	2.84E-02	4.26E-01
cellular response to tetrahydrofolate (GO:1904482)	1	1	.02	+	62.98	3.10E-02	4.26E-01
hypoxanthine catabolic process (GO:0009114)	1	1	.02	+	62.98	3.10E-02	4.26E-01
postsynaptic modulation of chemical synaptic transmission (GO:0099170)	15	2	.24	+	8.40	2.84E-02	4.26E-01
xanthine catabolic process (GO:0009115)	1	1	.02	+	62.98	3.10E-02	4.27E-01
lipid digestion (GO:0044241)	15	2	.24	+	8.40	2.84E-02	4.27E-01
regulation of selenocysteine incorporation (GO:1904569)	1	1	.02	+	62.98	3.10E-02	4.27E-01
response to redox state (GO:0051775)	15	2	.24	+	8.40	2.84E-02	4.27E-01
regulation of synapse structure or activity (GO:0050803)	221	8	3.51	+	2.28	2.80E-02	4.27E-01
negative regulation of selenocysteine incorporation (GO:1904570)	1	1	.02	+	62.98	3.10E-02	4.27E-01
negative regulation of transcription, DNA-templated (GO:0045892)	1297	11	20.59	-	.53	2.80E-02	4.27E-01
cellular response to oxygen radical (GO:0071450)	15	2	.24	+	8.40	2.84E-02	4.28E-01
negative regulation of RNA biosynthetic process (GO:1902679)	1301	11	20.66	-	.53	2.81E-02	4.28E-01
negative regulation of nucleic acid-templated transcription (GO:1903507)	1299	11	20.63	-	.53	2.80E-02	4.28E-01
negative regulation of mRNA binding (GO:1904572)	1	1	.02	+	62.98	3.10E-02	4.28E-01
G2/M transition of mitotic cell cycle (GO:0000086)	141	6	2.24	+	2.68	2.82E-02	4.28E-01
cellular response to superoxide (GO:0071451)	15	2	.24	+	8.40	2.84E-02	4.28E-01
G protein-coupled receptor signaling pathway (GO:0007186)	1305	11	20.72	-	.53	2.82E-02	4.28E-01
regulation of selenocysteine insertion sequence binding (GO:1904573)	1	1	.02	+	62.98	3.10E-02	4.28E-01
collagen-activated signaling pathway (GO:0038065)	15	2	.24	+	8.40	2.84E-02	4.28E-01
regulation of phosphorus metabolic process (GO:0051174)	1578	36	25.05	+	1.44	2.82E-02	4.28E-01
negative regulation of selenocysteine insertion sequence binding (GO:1904574)	1	1	.02	+	62.98	3.10E-02	4.29E-01
mitotic G1 DNA damage checkpoint signaling (GO:0031571)	70	4	1.11	+	3.60	2.87E-02	4.29E-01
regulation of proteolysis involved in cellular protein catabolic process (GO:1903050)	222	8	3.52	+	2.27	2.87E-02	4.29E-01
tyrosine metabolic process (GO:0006570)	15	2	.24	+	8.40	2.84E-02	4.29E-01
positive regulation of endocytosis (GO:0045807)	104	5	1.65	+	3.03	2.83E-02	4.29E-01
regulation of phosphate metabolic process (GO:0019220)	1578	36	25.05	+	1.44	2.82E-02	4.29E-01
epiboly involved in gastrulation with mouth forming second (GO:0055113)	1	1	.02	+	62.98	3.10E-02	4.29E-01
regulation of phospholipid transport (GO:2001138)	15	2	.24	+	8.40	2.84E-02	4.29E-01
negative regulation of hemopoiesis (GO:1903707)	104	5	1.65	+	3.03	2.83E-02	4.29E-01
regulation of amyloid precursor protein catabolic process (GO:1902991)	42	3	.67	+	4.50	3.31E-02	4.29E-01
long-chain fatty-acyl-CoA catabolic process (GO:0036116)	1	1	.02	+	62.98	3.10E-02	4.29E-01
bicarbonate transport (GO:0015701)	42	3	.67	+	4.50	3.31E-02	4.30E-01
regulation of proteasomal protein catabolic process (GO:0061136)	187	7	2.97	+	2.36	3.32E-02	4.30E-01
D-glucuronate metabolic process (GO:0042839)	1	1	.02	+	62.98	3.10E-02	4.30E-01
detection of chemical stimulus involved in sensory perception of taste (GO:0050912)	42	3	.67	+	4.50	3.31E-02	4.30E-01
positive regulation of ion transmembrane transport (GO:0034767)	187	7	2.97	+	2.36	3.32E-02	4.30E-01
D-glucuronate catabolic process (GO:0042840)	1	1	.02	+	62.98	3.10E-02	4.30E-01
cell-substrate junction assembly (GO:0007044)	42	3	.67	+	4.50	3.31E-02	4.30E-01
regulation of plasma membrane bounded cell projection assembly (GO:0120032)	187	7	2.97	+	2.36	3.32E-02	4.30E-01
pyridoxal 5'-phosphate salvage (GO:0009443)	1	1	.02	+	62.98	3.10E-02	4.30E-01
acute-phase response (GO:0006953)	42	3	.67	+	4.50	3.31E-02	4.31E-01
negative regulation of RNA binding (GO:1905215)	1	1	.02	+	62.98	3.10E-02	4.31E-01
regulation of leukocyte activation (GO:0002694)	622	17	9.88	+	1.72	3.31E-02	4.31E-01
positive regulation of axon extension (GO:0045773)	42	3	.67	+	4.50	3.31E-02	4.31E-01
response to methylamine (GO:0036255)	1	1	.02	+	62.98	3.10E-02	4.31E-01
morphogenesis of an epithelium (GO:0002009)	441	13	7.00	+	1.86	3.31E-02	4.31E-01
acetoacetic acid metabolic process (GO:0043438)	1	1	.02	+	62.98	3.10E-02	4.32E-01
dihydrolipoamide metabolic process (GO:0051068)	1	1	.02	+	62.98	3.10E-02	4.32E-01
limbic system development (GO:0021761)	109	5	1.73	+	2.89	3.35E-02	4.32E-01
L-xylitol catabolic process (GO:0051160)	1	1	.02	+	62.98	3.10E-02	4.32E-01
renal system development (GO:0072001)	291	10	4.62	+	2.16	2.90E-02	4.32E-01
L-xylitol metabolic process (GO:0051164)	1	1	.02	+	62.98	3.10E-02	4.33E-01
regulation of protein localization to nucleus (GO:1900180)	142	6	2.25	+	2.66	2.90E-02	4.33E-01
B cell receptor apoptotic signaling pathway (GO:1990117)	1	1	.02	+	62.98	3.10E-02	4.33E-01
negative regulation of the force of heart contraction (GO:0098736)	1	1	.02	+	62.98	3.10E-02	4.33E-01
(R)-carnitine transport (GO:1900749)	1	1	.02	+	62.98	3.10E-02	4.34E-01
poly-gamma-glutamate metabolic process (GO:0070500)	1	1	.02	+	62.98	3.10E-02	4.34E-01
sorbitol catabolic process (GO:0006062)	1	1	.02	+	62.98	3.10E-02	4.35E-01
regulation of neural crest formation (GO:0090299)	1	1	.02	+	62.98	3.10E-02	4.35E-01
regulation of heparan sulfate binding (GO:1905853)	1	1	.02	+	62.98	3.10E-02	4.35E-01
positive regulation of heparan sulfate binding (GO:1905855)	1	1	.02	+	62.98	3.10E-02	4.36E-01
regulation of heparan sulfate proteoglycan binding (GO:1905858)	1	1	.02	+	62.98	3.10E-02	4.36E-01
positive regulation of heparan sulfate proteoglycan binding (GO:1905860)	1	1	.02	+	62.98	3.10E-02	4.37E-01
peptidyl-histidine phosphorylation (GO:0018106)	1	1	.02	+	62.98	3.10E-02	4.37E-01
regulation of cellular response to very-low-density lipoprotein particle stimulus (GO:1905890)	1	1	.02	+	62.98	3.10E-02	4.37E-01
sodium-dependent organic cation transport (GO:0070715)	1	1	.02	+	62.98	3.10E-02	4.38E-01
negative regulation of neural crest formation (GO:0090301)	1	1	.02	+	62.98	3.10E-02	4.38E-01
positive regulation of germ cell proliferation (GO:1905938)	1	1	.02	+	62.98	3.10E-02	4.39E-01
cellular response to organic cyclic compound (GO:0071407)	511	15	8.11	+	1.85	2.95E-02	4.39E-01
mitochondrial tricarboxylic acid transmembrane transport (GO:1990546)	1	1	.02	+	62.98	3.10E-02	4.39E-01
regulation of lamellipodium assembly (GO:0010591)	40	3	.64	+	4.72	2.95E-02	4.39E-01
homogentisate catabolic process (GO:1902000)	1	1	.02	+	62.98	3.10E-02	4.39E-01
homeostasis of number of cells (GO:0048872)	230	8	3.65	+	2.19	3.41E-02	4.39E-01
positive regulation of male germ cell proliferation (GO:2000256)	1	1	.02	+	62.98	3.10E-02	4.40E-01
negative regulation of apoptotic signaling pathway (GO:2001234)	230	8	3.65	+	2.19	3.41E-02	4.40E-01
negative regulation of postsynaptic membrane organization (GO:1901627)	1	1	.02	+	62.98	3.10E-02	4.40E-01
regulation of protein stability (GO:0031647)	306	10	4.86	+	2.06	3.42E-02	4.40E-01
negative regulation of tumor necrosis factor (ligand) superfamily member 11 production (GO:2000308)	1	1	.02	+	62.98	3.10E-02	4.40E-01
negative regulation of fibroblast growth factor receptor signaling pathway involved in neural plate anterior/posterior pattern formation (GO:2000314)	1	1	.02	+	62.98	3.10E-02	4.41E-01
aspartyl-tRNA aminoacylation (GO:0006422)	1	1	.02	+	62.98	3.10E-02	4.41E-01
retina development in camera-type eye (GO:0060041)	148	6	2.35	+	2.55	3.43E-02	4.41E-01
endocrine signaling (GO:0038002)	1	1	.02	+	62.98	3.10E-02	4.42E-01
insulin receptor recycling (GO:0038020)	1	1	.02	+	62.98	3.10E-02	4.42E-01
(R)-carnitine transmembrane transport (GO:1902270)	1	1	.02	+	62.98	3.10E-02	4.42E-01
trans-Golgi network to recycling endosome transport (GO:0044795)	1	1	.02	+	62.98	3.10E-02	4.43E-01
siderophore-dependent iron import into cell (GO:0033214)	1	1	.02	+	62.98	3.10E-02	4.43E-01
regulation of cellular amine catabolic process (GO:0033241)	1	1	.02	+	62.98	3.10E-02	4.44E-01
negative regulation of cellular amine catabolic process (GO:0033242)	1	1	.02	+	62.98	3.10E-02	4.44E-01
cell cycle G2/M phase transition (GO:0044839)	143	6	2.27	+	2.64	2.99E-02	4.44E-01
body fluid secretion (GO:0007589)	71	4	1.13	+	3.55	2.99E-02	4.44E-01
positive regulation of amino acid uptake involved in synaptic transmission (GO:0051943)	1	1	.02	+	62.98	3.10E-02	4.44E-01
positive regulation of glutamate uptake involved in transmission of nerve impulse (GO:0051951)	1	1	.02	+	62.98	3.10E-02	4.45E-01
mitotic G1/S transition checkpoint signaling (GO:0044819)	71	4	1.13	+	3.55	2.99E-02	4.45E-01
short-chain fatty acid metabolic process (GO:0046459)	17	2	.27	+	7.41	3.50E-02	4.45E-01
mesenchymal to epithelial transition involved in renal vesicle formation (GO:0072036)	1	1	.02	+	62.98	3.10E-02	4.45E-01
modulation of excitatory postsynaptic potential (GO:0098815)	43	3	.68	+	4.39	3.50E-02	4.46E-01
platelet formation (GO:0030220)	17	2	.27	+	7.41	3.50E-02	4.46E-01
plasma membrane raft distribution (GO:0044855)	1	1	.02	+	62.98	3.10E-02	4.46E-01
negative regulation of endothelial cell proliferation (GO:0001937)	43	3	.68	+	4.39	3.50E-02	4.46E-01
regulation of microglial cell activation (GO:1903978)	17	2	.27	+	7.41	3.50E-02	4.46E-01
plasma membrane raft localization (GO:0044856)	1	1	.02	+	62.98	3.10E-02	4.46E-01
positive regulation of vascular permeability (GO:0043117)	17	2	.27	+	7.41	3.50E-02	4.46E-01
T cell homeostatic proliferation (GO:0001777)	1	1	.02	+	62.98	3.10E-02	4.47E-01
retinal ganglion cell axon guidance (GO:0031290)	17	2	.27	+	7.41	3.50E-02	4.47E-01
beta-alanine biosynthetic process via 3-ureidopropionate (GO:0033396)	1	1	.02	+	62.98	3.10E-02	4.47E-01
platelet morphogenesis (GO:0036344)	17	2	.27	+	7.41	3.50E-02	4.47E-01
homogentisate metabolic process (GO:1901999)	1	1	.02	+	62.98	3.10E-02	4.47E-01
dicarboxylic acid catabolic process (GO:0043649)	17	2	.27	+	7.41	3.50E-02	4.47E-01
modulation of process of other organism (GO:0035821)	149	6	2.37	+	2.54	3.52E-02	4.48E-01
vestibular receptor cell stereocilium organization (GO:0060121)	1	1	.02	+	62.98	3.10E-02	4.48E-01
late endosome to vacuole transport via multivesicular body sorting pathway (GO:0032511)	17	2	.27	+	7.41	3.50E-02	4.48E-01
acute inflammatory response (GO:0002526)	75	4	1.19	+	3.36	3.53E-02	4.48E-01
regulation of hair follicle development (GO:0051797)	17	2	.27	+	7.41	3.50E-02	4.48E-01
cholangiocyte apoptotic process (GO:1902488)	1	1	.02	+	62.98	3.10E-02	4.48E-01
regulation of cell projection assembly (GO:0060491)	189	7	3.00	+	2.33	3.48E-02	4.48E-01
negative regulation of lipase activity (GO:0060192)	17	2	.27	+	7.41	3.50E-02	4.48E-01
release of matrix enzymes from mitochondria (GO:0032976)	1	1	.02	+	62.98	3.10E-02	4.49E-01
negative regulation of cell population proliferation (GO:0008285)	703	19	11.16	+	1.70	3.03E-02	4.49E-01
glutathione biosynthetic process (GO:0006750)	17	2	.27	+	7.41	3.50E-02	4.49E-01
negative regulation of phospholipid transport (GO:2001139)	1	1	.02	+	62.98	3.10E-02	4.49E-01
negative regulation of response to biotic stimulus (GO:0002832)	106	5	1.68	+	2.97	3.03E-02	4.49E-01
negative regulation of glycoprotein metabolic process (GO:1903019)	17	2	.27	+	7.41	3.50E-02	4.49E-01
regulation of lipid transport across blood-brain barrier (GO:1903000)	1	1	.02	+	62.98	3.10E-02	4.49E-01
protein secretion (GO:0009306)	106	5	1.68	+	2.97	3.03E-02	4.49E-01
negative regulation of lipid transport across blood-brain barrier (GO:1903001)	1	1	.02	+	62.98	3.10E-02	4.50E-01
regulation of kinase activity (GO:0043549)	914	23	14.51	+	1.58	3.04E-02	4.50E-01
positive regulation of lipid transport across blood-brain barrier (GO:1903002)	1	1	.02	+	62.98	3.10E-02	4.50E-01
mesenchymal to epithelial transition involved in metanephric renal vesicle formation (GO:0072285)	1	1	.02	+	62.98	3.10E-02	4.51E-01
intermediate-density lipoprotein particle clearance (GO:0071831)	1	1	.02	+	62.98	3.10E-02	4.51E-01
antigen processing and presentation of exogenous protein antigen via MHC class Ib, TAP-dependent (GO:0002481)	1	1	.02	+	62.98	3.10E-02	4.51E-01
mitochondrial citrate transmembrane transport (GO:0006843)	1	1	.02	+	62.98	3.10E-02	4.52E-01
ventral midline determination (GO:0007371)	1	1	.02	+	62.98	3.10E-02	4.52E-01
respiratory burst involved in inflammatory response (GO:0002536)	1	1	.02	+	62.98	3.10E-02	4.53E-01
regulation of erythrocyte aggregation (GO:0034118)	1	1	.02	+	62.98	3.10E-02	4.53E-01
positive regulation of erythrocyte aggregation (GO:0034120)	1	1	.02	+	62.98	3.10E-02	4.54E-01
response to glucose (GO:0009749)	144	6	2.29	+	2.62	3.07E-02	4.54E-01
regulation of choline O-acetyltransferase activity (GO:1902769)	1	1	.02	+	62.98	3.10E-02	4.54E-01
positive regulation of choline O-acetyltransferase activity (GO:1902771)	1	1	.02	+	62.98	3.10E-02	4.54E-01
protein deglutathionylation (GO:0080058)	1	1	.02	+	62.98	3.10E-02	4.55E-01
positive regulation of ion transport (GO:0043270)	297	10	4.72	+	2.12	3.08E-02	4.55E-01
hexitol catabolic process (GO:0019407)	1	1	.02	+	62.98	3.10E-02	4.55E-01
positive regulation of catabolic process (GO:0009896)	519	15	8.24	+	1.82	3.09E-02	4.55E-01
regulation of citrulline biosynthetic process (GO:1903248)	1	1	.02	+	62.98	3.10E-02	4.56E-01
negative regulation of citrulline biosynthetic process (GO:1903249)	1	1	.02	+	62.98	3.10E-02	4.56E-01
regulation of macrophage antigen processing and presentation (GO:0002616)	1	1	.02	+	62.98	3.10E-02	4.56E-01
negative regulation of macrophage antigen processing and presentation (GO:0002617)	1	1	.02	+	62.98	3.10E-02	4.57E-01
positive regulation of cellular catabolic process (GO:0031331)	450	13	7.14	+	1.82	3.63E-02	4.61E-01
regulation of tissue remodeling (GO:0034103)	76	4	1.21	+	3.31	3.67E-02	4.65E-01
positive regulation of adaptive immune response (GO:0002821)	112	5	1.78	+	2.81	3.68E-02	4.66E-01
formation of primary germ layer (GO:0001704)	112	5	1.78	+	2.81	3.68E-02	4.66E-01
lactation (GO:0007595)	44	3	.70	+	4.29	3.70E-02	4.68E-01
protein-DNA complex assembly (GO:0065004)	256	0	4.06	-	< 0.01	3.70E-02	4.68E-01
positive regulation of anion transport (GO:1903793)	44	3	.70	+	4.29	3.70E-02	4.68E-01
regulation of hemopoiesis (GO:1903706)	390	12	6.19	+	1.94	3.75E-02	4.73E-01
high-density lipoprotein particle remodeling (GO:0034375)	18	2	.29	+	7.00	3.84E-02	4.79E-01
tetrahydrofolate metabolic process (GO:0046653)	18	2	.29	+	7.00	3.84E-02	4.80E-01
positive regulation of macrophage derived foam cell differentiation (GO:0010744)	18	2	.29	+	7.00	3.84E-02	4.80E-01
aromatic amino acid family catabolic process (GO:0009074)	18	2	.29	+	7.00	3.84E-02	4.80E-01
pigment metabolic process (GO:0042440)	77	4	1.22	+	3.27	3.82E-02	4.81E-01
response to superoxide (GO:0000303)	18	2	.29	+	7.00	3.84E-02	4.81E-01
sterol transport (GO:0015918)	77	4	1.22	+	3.27	3.82E-02	4.81E-01
reverse cholesterol transport (GO:0043691)	18	2	.29	+	7.00	3.84E-02	4.81E-01
regulation of inclusion body assembly (GO:0090083)	18	2	.29	+	7.00	3.84E-02	4.82E-01
epithelial cell-cell adhesion (GO:0090136)	18	2	.29	+	7.00	3.84E-02	4.82E-01
regulation of neuron death (GO:1901214)	316	10	5.02	+	1.99	3.87E-02	4.82E-01
modulation by host of viral genome replication (GO:0044827)	18	2	.29	+	7.00	3.84E-02	4.82E-01
negative regulation of amyloid-beta formation (GO:1902430)	18	2	.29	+	7.00	3.84E-02	4.83E-01
AMP metabolic process (GO:0046033)	18	2	.29	+	7.00	3.84E-02	4.83E-01
regulation of receptor localization to synapse (GO:1902683)	18	2	.29	+	7.00	3.84E-02	4.83E-01
mRNA processing (GO:0006397)	486	2	7.72	-	.26	3.88E-02	4.83E-01
positive regulation of keratinocyte differentiation (GO:0045618)	18	2	.29	+	7.00	3.84E-02	4.84E-01
positive regulation of glucose transmembrane transport (GO:0010828)	45	3	.71	+	4.20	3.90E-02	4.84E-01
regulation of vascular permeability (GO:0043114)	45	3	.71	+	4.20	3.90E-02	4.85E-01
protein localization to extracellular region (GO:0071692)	114	5	1.81	+	2.76	3.91E-02	4.85E-01
glandular epithelial cell differentiation (GO:0002067)	45	3	.71	+	4.20	3.90E-02	4.85E-01
nucleobase-containing compound metabolic process (GO:0006139)	2705	56	42.95	+	1.30	3.92E-02	4.85E-01
camera-type eye development (GO:0043010)	317	10	5.03	+	1.99	3.92E-02	4.85E-01
negative regulation of protein kinase B signaling (GO:0051898)	45	3	.71	+	4.20	3.90E-02	4.85E-01
positive regulation of secretion (GO:0051047)	317	10	5.03	+	1.99	3.92E-02	4.86E-01
negative regulation of peptidase activity (GO:0010466)	257	9	4.08	+	2.21	3.93E-02	4.86E-01
regulation of actin filament-based process (GO:0032970)	397	12	6.30	+	1.90	3.94E-02	4.87E-01
regulation of protein catabolic process (GO:0042176)	398	12	6.32	+	1.90	3.97E-02	4.89E-01
regulation of mitochondrial membrane permeability (GO:0046902)	78	4	1.24	+	3.23	3.96E-02	4.89E-01
establishment of organelle localization (GO:0051656)	398	12	6.32	+	1.90	3.97E-02	4.89E-01
columnar/cuboidal epithelial cell differentiation (GO:0002065)	78	4	1.24	+	3.23	3.96E-02	4.89E-01
regulation of cell population proliferation (GO:0042127)	1654	37	26.26	+	1.41	3.99E-02	4.91E-01
aflatoxin catabolic process (GO:0046223)	2	1	.03	+	31.49	4.62E-02	4.93E-01
coumarin catabolic process (GO:0046226)	2	1	.03	+	31.49	4.62E-02	4.93E-01
regulation of ion transport (GO:0043269)	703	18	11.16	+	1.61	4.62E-02	4.94E-01
phenylpropanoid catabolic process (GO:0046271)	2	1	.03	+	31.49	4.62E-02	4.94E-01
regulation of lipoprotein lipid oxidation (GO:0060587)	2	1	.03	+	31.49	4.62E-02	4.94E-01
propionate catabolic process (GO:0019543)	2	1	.03	+	31.49	4.62E-02	4.94E-01
glutamate catabolic process to aspartate (GO:0019550)	2	1	.03	+	31.49	4.62E-02	4.95E-01
negative regulation of phosphate metabolic process (GO:0045936)	483	14	7.67	+	1.83	4.03E-02	4.95E-01
glutamate catabolic process to 2-oxoglutarate (GO:0019551)	2	1	.03	+	31.49	4.62E-02	4.95E-01
response to amino acid (GO:0043200)	115	5	1.83	+	2.74	4.03E-02	4.95E-01
snRNA import into nucleus (GO:0061015)	2	1	.03	+	31.49	4.62E-02	4.95E-01
forebrain astrocyte differentiation (GO:0021896)	2	1	.03	+	31.49	4.62E-02	4.96E-01
positive regulation of vasculature development (GO:1904018)	160	6	2.54	+	2.36	4.66E-02	4.96E-01
regulation of myeloid leukocyte differentiation (GO:0002761)	120	5	1.91	+	2.62	4.67E-02	4.96E-01
forebrain astrocyte development (GO:0021897)	2	1	.03	+	31.49	4.62E-02	4.96E-01
cellular response to interferon-gamma (GO:0071346)	160	6	2.54	+	2.36	4.66E-02	4.96E-01
negative regulation of cellular protein localization (GO:1903828)	120	5	1.91	+	2.62	4.67E-02	4.96E-01
glycerol biosynthetic process from pyruvate (GO:0046327)	2	1	.03	+	31.49	4.62E-02	4.96E-01
negative regulation of phosphorus metabolic process (GO:0010563)	484	14	7.68	+	1.82	4.05E-02	4.96E-01
positive regulation of angiogenesis (GO:0045766)	160	6	2.54	+	2.36	4.66E-02	4.97E-01
synaptic vesicle cycle (GO:0099504)	120	5	1.91	+	2.62	4.67E-02	4.97E-01
regulation of early endosome to recycling endosome transport (GO:1902954)	2	1	.03	+	31.49	4.62E-02	4.97E-01
regulation of metalloendopeptidase activity involved in amyloid precursor protein catabolic process (GO:1902962)	2	1	.03	+	31.49	4.62E-02	4.97E-01
negative regulation of metalloendopeptidase activity involved in amyloid precursor protein catabolic process (GO:1902963)	2	1	.03	+	31.49	4.62E-02	4.97E-01
fructose biosynthetic process (GO:0046370)	2	1	.03	+	31.49	4.62E-02	4.98E-01
positive regulation of neurofibrillary tangle assembly (GO:1902998)	2	1	.03	+	31.49	4.62E-02	4.98E-01
hydrogen peroxide-mediated programmed cell death (GO:0010421)	2	1	.03	+	31.49	4.62E-02	4.98E-01
negative regulation of natural killer cell mediated immune response to tumor cell (GO:0002856)	2	1	.03	+	31.49	4.62E-02	4.99E-01
negative regulation of natural killer cell mediated cytotoxicity directed against tumor cell target (GO:0002859)	2	1	.03	+	31.49	4.62E-02	4.99E-01
regulation of lipoprotein oxidation (GO:0034442)	2	1	.03	+	31.49	4.62E-02	4.99E-01
vacuolar transmembrane transport (GO:0034486)	2	1	.03	+	31.49	4.62E-02	5.00E-01
regulation of intestinal epithelial structure maintenance (GO:0060730)	2	1	.03	+	31.49	4.62E-02	5.00E-01
negative regulation of vascular endothelial growth factor production (GO:1904046)	2	1	.03	+	31.49	4.62E-02	5.00E-01
regulation of protein binding (GO:0043393)	196	7	3.11	+	2.25	4.09E-02	5.01E-01
associative learning (GO:0008306)	79	4	1.25	+	3.19	4.12E-02	5.01E-01
smooth muscle cell-matrix adhesion (GO:0061302)	2	1	.03	+	31.49	4.62E-02	5.01E-01
mitotic cell cycle phase transition (GO:0044772)	262	9	4.16	+	2.16	4.09E-02	5.01E-01
negative regulation of chaperone-mediated protein folding (GO:1903645)	2	1	.03	+	31.49	4.62E-02	5.01E-01
DNA damage response, signal transduction by p53 class mediator (GO:0030330)	79	4	1.25	+	3.19	4.12E-02	5.01E-01
L-ascorbic acid biosynthetic process (GO:0019853)	2	1	.03	+	31.49	4.62E-02	5.01E-01
positive regulation of cell morphogenesis involved in differentiation (GO:0010770)	79	4	1.25	+	3.19	4.12E-02	5.02E-01
retinol transport (GO:0034633)	2	1	.03	+	31.49	4.62E-02	5.02E-01
neural crest cell development (GO:0014032)	79	4	1.25	+	3.19	4.12E-02	5.02E-01
regulation of actin filament organization (GO:0110053)	277	9	4.40	+	2.05	4.73E-02	5.02E-01
DN2 thymocyte differentiation (GO:1904155)	2	1	.03	+	31.49	4.62E-02	5.02E-01
negative regulation of epithelial cell apoptotic process (GO:1904036)	46	3	.73	+	4.11	4.11E-02	5.02E-01
diencephalon development (GO:0021536)	79	4	1.25	+	3.19	4.12E-02	5.02E-01
retinal cell programmed cell death (GO:0046666)	2	1	.03	+	31.49	4.62E-02	5.03E-01
interleukin-12-mediated signaling pathway (GO:0035722)	46	3	.73	+	4.11	4.11E-02	5.03E-01
positive regulation of transcription from RNA polymerase II promoter in response to acidic pH (GO:0061402)	2	1	.03	+	31.49	4.62E-02	5.03E-01
negative regulation of sequestering of calcium ion (GO:0051283)	46	3	.73	+	4.11	4.11E-02	5.03E-01
regulation of immune response (GO:0050776)	1183	28	18.78	+	1.49	4.11E-02	5.03E-01
induction by virus of host autophagy (GO:0039520)	2	1	.03	+	31.49	4.62E-02	5.03E-01
animal organ morphogenesis (GO:0009887)	956	23	15.18	+	1.52	4.74E-02	5.03E-01
regulation of glutathione biosynthetic process (GO:1903786)	2	1	.03	+	31.49	4.62E-02	5.04E-01
regulation of protein glutathionylation (GO:0010732)	2	1	.03	+	31.49	4.62E-02	5.04E-01
negative regulation of protein glutathionylation (GO:0010734)	2	1	.03	+	31.49	4.62E-02	5.04E-01
regulation of intrinsic apoptotic signaling pathway (GO:2001242)	161	6	2.56	+	2.35	4.77E-02	5.05E-01
pre-miRNA export from nucleus (GO:0035281)	2	1	.03	+	31.49	4.62E-02	5.05E-01
regulation of neuronal synaptic plasticity (GO:0048168)	49	3	.78	+	3.86	4.77E-02	5.05E-01
regulation of chromatin disassembly (GO:0010848)	2	1	.03	+	31.49	4.62E-02	5.05E-01
response to interleukin-12 (GO:0070671)	49	3	.78	+	3.86	4.77E-02	5.05E-01
lipid transport involved in lipid storage (GO:0010877)	2	1	.03	+	31.49	4.62E-02	5.05E-01
response to amine (GO:0014075)	49	3	.78	+	3.86	4.77E-02	5.05E-01
deoxyguanosine metabolic process (GO:0042453)	2	1	.03	+	31.49	4.62E-02	5.06E-01
morphogenesis of a polarized epithelium (GO:0001738)	49	3	.78	+	3.86	4.77E-02	5.06E-01
positive regulation of establishment of T cell polarity (GO:1903905)	2	1	.03	+	31.49	4.62E-02	5.06E-01
pyridoxine metabolic process (GO:0008614)	2	1	.03	+	31.49	4.62E-02	5.06E-01
pyridoxine biosynthetic process (GO:0008615)	2	1	.03	+	31.49	4.62E-02	5.07E-01
positive regulation of dendritic spine morphogenesis (GO:0061003)	19	2	.30	+	6.63	4.21E-02	5.07E-01
regulation of ferrous iron binding (GO:1904432)	2	1	.03	+	31.49	4.62E-02	5.07E-01
mammary gland alveolus development (GO:0060749)	19	2	.30	+	6.63	4.21E-02	5.07E-01
regulation of system process (GO:0044057)	585	16	9.29	+	1.72	4.21E-02	5.07E-01
positive regulation of ferrous iron binding (GO:1904434)	2	1	.03	+	31.49	4.62E-02	5.07E-01
negative regulation of platelet activation (GO:0010544)	19	2	.30	+	6.63	4.21E-02	5.08E-01
organic hydroxy compound transport (GO:0015850)	156	6	2.48	+	2.42	4.22E-02	5.08E-01
regulation of transferrin receptor binding (GO:1904435)	2	1	.03	+	31.49	4.62E-02	5.08E-01
mammary gland lobule development (GO:0061377)	19	2	.30	+	6.63	4.21E-02	5.08E-01
establishment or maintenance of cell polarity (GO:0007163)	197	7	3.13	+	2.24	4.18E-02	5.08E-01
positive regulation of transferrin receptor binding (GO:1904437)	2	1	.03	+	31.49	4.62E-02	5.08E-01
folic acid metabolic process (GO:0046655)	19	2	.30	+	6.63	4.21E-02	5.08E-01
tetrahydrofolylpolyglutamate metabolic process (GO:0046900)	2	1	.03	+	31.49	4.62E-02	5.08E-01
response to oxygen radical (GO:0000305)	19	2	.30	+	6.63	4.21E-02	5.09E-01
hydroxylysine metabolic process (GO:0046946)	2	1	.03	+	31.49	4.62E-02	5.09E-01
regulation of phospholipid biosynthetic process (GO:0071071)	19	2	.30	+	6.63	4.21E-02	5.09E-01
hydroxylysine biosynthetic process (GO:0046947)	2	1	.03	+	31.49	4.62E-02	5.09E-01
cytokine-mediated signaling pathway (GO:0019221)	687	18	10.91	+	1.65	4.24E-02	5.09E-01
cellular response to fluid shear stress (GO:0071498)	19	2	.30	+	6.63	4.21E-02	5.09E-01
lipoate metabolic process (GO:0009106)	2	1	.03	+	31.49	4.62E-02	5.10E-01
nonribosomal peptide biosynthetic process (GO:0019184)	19	2	.30	+	6.63	4.21E-02	5.10E-01
Golgi to plasma membrane CFTR protein transport (GO:0043000)	2	1	.03	+	31.49	4.62E-02	5.10E-01
positive regulation of bone mineralization involved in bone maturation (GO:1900159)	2	1	.03	+	31.49	4.62E-02	5.10E-01
regulation of mammary gland epithelial cell proliferation (GO:0033599)	19	2	.30	+	6.63	4.21E-02	5.10E-01
sensory perception (GO:0007600)	979	8	15.54	-	.51	4.83E-02	5.10E-01
regulation of single-species biofilm formation (GO:1900190)	2	1	.03	+	31.49	4.62E-02	5.11E-01
antigen processing and presentation of endogenous peptide antigen (GO:0002483)	19	2	.30	+	6.63	4.21E-02	5.11E-01
cellular macromolecule catabolic process (GO:0044265)	925	23	14.69	+	1.57	4.25E-02	5.11E-01
negative regulation of single-species biofilm formation (GO:1900191)	2	1	.03	+	31.49	4.62E-02	5.11E-01
nucleobase biosynthetic process (GO:0046112)	19	2	.30	+	6.63	4.21E-02	5.11E-01
10-formyltetrahydrofolate catabolic process (GO:0009258)	2	1	.03	+	31.49	4.62E-02	5.11E-01
regulation of single-species biofilm formation in or on host organism (GO:1900228)	2	1	.03	+	31.49	4.62E-02	5.12E-01
retina homeostasis (GO:0001895)	80	4	1.27	+	3.15	4.27E-02	5.12E-01
negative regulation of single-species biofilm formation in or on host organism (GO:1900229)	2	1	.03	+	31.49	4.62E-02	5.12E-01
negative regulation of myeloid cell differentiation (GO:0045638)	80	4	1.27	+	3.15	4.27E-02	5.12E-01
translational attenuation (GO:0009386)	2	1	.03	+	31.49	4.62E-02	5.12E-01
intracellular receptor signaling pathway (GO:0030522)	198	7	3.14	+	2.23	4.27E-02	5.12E-01
tricarboxylic acid transmembrane transport (GO:0035674)	2	1	.03	+	31.49	4.62E-02	5.13E-01
medium-chain fatty-acyl-CoA catabolic process (GO:0036114)	2	1	.03	+	31.49	4.62E-02	5.13E-01
pyridoxal phosphate biosynthetic process (GO:0042823)	2	1	.03	+	31.49	4.62E-02	5.13E-01
toxin catabolic process (GO:0009407)	2	1	.03	+	31.49	4.62E-02	5.14E-01
negative regulation of memory T cell differentiation (GO:0043381)	2	1	.03	+	31.49	4.62E-02	5.14E-01
urogenital system development (GO:0001655)	324	10	5.14	+	1.94	4.30E-02	5.14E-01
regulation of response to external stimulus (GO:0032101)	1199	28	19.04	+	1.47	4.30E-02	5.14E-01
mycotoxin catabolic process (GO:0043387)	2	1	.03	+	31.49	4.62E-02	5.15E-01
positive regulation of calcium ion transmembrane transport via high voltage-gated calcium channel (GO:1904879)	2	1	.03	+	31.49	4.62E-02	5.15E-01
peptidyl-pyroglutamic acid biosynthetic process, using glutaminyl-peptide cyclotransferase (GO:0017186)	2	1	.03	+	31.49	4.62E-02	5.15E-01
stem cell differentiation (GO:0048863)	157	6	2.49	+	2.41	4.33E-02	5.15E-01
establishment of protein localization to plasma membrane (GO:0061951)	47	3	.75	+	4.02	4.32E-02	5.16E-01
palmitic acid metabolic process (GO:1900533)	2	1	.03	+	31.49	4.62E-02	5.16E-01
regulation of leukocyte degranulation (GO:0043300)	47	3	.75	+	4.02	4.32E-02	5.16E-01
palmitic acid biosynthetic process (GO:1900535)	2	1	.03	+	31.49	4.62E-02	5.16E-01
negative regulation of reactive oxygen species metabolic process (GO:2000378)	47	3	.75	+	4.02	4.32E-02	5.16E-01
histone H3-R26 citrullination (GO:0036413)	2	1	.03	+	31.49	4.62E-02	5.16E-01
regulation of transmembrane transport (GO:0034762)	591	16	9.38	+	1.71	4.34E-02	5.17E-01
negative regulation of proteasomal protein catabolic process (GO:1901799)	47	3	.75	+	4.02	4.32E-02	5.17E-01
intrinsic apoptotic signaling pathway in response to hydrogen peroxide (GO:0036481)	2	1	.03	+	31.49	4.62E-02	5.17E-01
face development (GO:0060324)	47	3	.75	+	4.02	4.32E-02	5.17E-01
regulation of oligopeptide transport (GO:0090088)	2	1	.03	+	31.49	4.62E-02	5.17E-01
regulation of dipeptide transport (GO:0090089)	2	1	.03	+	31.49	4.62E-02	5.18E-01
response to transition metal nanoparticle (GO:1990267)	2	1	.03	+	31.49	4.62E-02	5.18E-01
AMP salvage (GO:0044209)	2	1	.03	+	31.49	4.62E-02	5.18E-01
negative regulation of negative chemotaxis (GO:0050925)	2	1	.03	+	31.49	4.62E-02	5.19E-01
organic heteropentacyclic compound catabolic process (GO:1901377)	2	1	.03	+	31.49	4.62E-02	5.19E-01
negative regulation of response to oxidative stress (GO:1902883)	21	2	.33	+	6.00	4.97E-02	5.19E-01
sorbitol metabolic process (GO:0006060)	2	1	.03	+	31.49	4.62E-02	5.19E-01
regulation of hydrogen peroxide metabolic process (GO:0010310)	21	2	.33	+	6.00	4.97E-02	5.19E-01
positive regulation of transferase activity (GO:0051347)	693	18	11.00	+	1.64	4.37E-02	5.20E-01
glyoxylate cycle (GO:0006097)	2	1	.03	+	31.49	4.62E-02	5.20E-01
left/right pattern formation (GO:0060972)	21	2	.33	+	6.00	4.97E-02	5.20E-01
mesenchymal cell development (GO:0014031)	84	4	1.33	+	3.00	4.92E-02	5.20E-01
negative regulation of smooth muscle cell-matrix adhesion (GO:2000098)	2	1	.03	+	31.49	4.62E-02	5.20E-01
regulation of ERAD pathway (GO:1904292)	21	2	.33	+	6.00	4.97E-02	5.20E-01
regeneration (GO:0031099)	163	6	2.59	+	2.32	5.00E-02	5.20E-01
centrosome-templated microtubule nucleation (GO:0090222)	2	1	.03	+	31.49	4.62E-02	5.20E-01
ribonucleoside catabolic process (GO:0042454)	21	2	.33	+	6.00	4.97E-02	5.21E-01
regulation of lipid localization (GO:1905952)	163	6	2.59	+	2.32	5.00E-02	5.21E-01
kidney development (GO:0001822)	282	9	4.48	+	2.01	5.00E-02	5.21E-01
glycerophosphate shuttle (GO:0006127)	2	1	.03	+	31.49	4.62E-02	5.21E-01
aspartate family amino acid biosynthetic process (GO:0009067)	21	2	.33	+	6.00	4.97E-02	5.21E-01
regulation of angiogenesis (GO:0045765)	282	9	4.48	+	2.01	5.00E-02	5.21E-01
guanine catabolic process (GO:0006147)	2	1	.03	+	31.49	4.62E-02	5.21E-01
regulation of vascular endothelial growth factor signaling pathway (GO:1900746)	21	2	.33	+	6.00	4.97E-02	5.21E-01
purine-containing compound catabolic process (GO:0072523)	50	3	.79	+	3.78	5.00E-02	5.21E-01
glycerol metabolic process (GO:0006071)	21	2	.33	+	6.00	4.97E-02	5.22E-01
inosine catabolic process (GO:0006148)	2	1	.03	+	31.49	4.62E-02	5.22E-01
negative regulation of Ras protein signal transduction (GO:0046580)	50	3	.79	+	3.78	5.00E-02	5.22E-01
melanosome transport (GO:0032402)	21	2	.33	+	6.00	4.97E-02	5.22E-01
deoxyinosine catabolic process (GO:0006149)	2	1	.03	+	31.49	4.62E-02	5.22E-01
cellular response to virus (GO:0098586)	50	3	.79	+	3.78	5.00E-02	5.22E-01
regulation of establishment of cell polarity (GO:2000114)	21	2	.33	+	6.00	4.97E-02	5.22E-01
deoxyguanosine catabolic process (GO:0006161)	2	1	.03	+	31.49	4.62E-02	5.22E-01
positive regulation of phosphoprotein phosphatase activity (GO:0032516)	21	2	.33	+	6.00	4.97E-02	5.23E-01
adenine salvage (GO:0006168)	2	1	.03	+	31.49	4.62E-02	5.23E-01
cell migration involved in sprouting angiogenesis (GO:0002042)	21	2	.33	+	6.00	4.97E-02	5.23E-01
cellular response to iron(III) ion (GO:0071283)	2	1	.03	+	31.49	4.62E-02	5.23E-01
negative regulation of cell activation (GO:0050866)	205	7	3.25	+	2.15	4.95E-02	5.23E-01
glandular epithelial cell development (GO:0002068)	21	2	.33	+	6.00	4.97E-02	5.23E-01
regulation of presynaptic membrane organization (GO:1901629)	2	1	.03	+	31.49	4.62E-02	5.23E-01
regulation of protein localization to synapse (GO:1902473)	21	2	.33	+	6.00	4.97E-02	5.24E-01
positive regulation of presynaptic membrane organization (GO:1901631)	2	1	.03	+	31.49	4.62E-02	5.24E-01
regulation of antigen processing and presentation (GO:0002577)	21	2	.33	+	6.00	4.97E-02	5.24E-01
regulation of fibroblast growth factor receptor signaling pathway involved in neural plate anterior/posterior pattern formation (GO:2000313)	2	1	.03	+	31.49	4.62E-02	5.24E-01
regulation of ubiquitin-dependent endocytosis (GO:2000395)	2	1	.03	+	31.49	4.62E-02	5.25E-01
positive regulation of ubiquitin-dependent endocytosis (GO:2000397)	2	1	.03	+	31.49	4.62E-02	5.25E-01
detection of chemical stimulus involved in sensory perception of sour taste (GO:0001581)	2	1	.03	+	31.49	4.62E-02	5.25E-01
xylulose biosynthetic process (GO:0005999)	2	1	.03	+	31.49	4.62E-02	5.26E-01
positive regulation of cell-cell adhesion (GO:0022409)	283	9	4.49	+	2.00	5.06E-02	5.26E-01
seryl-tRNA aminoacylation (GO:0006434)	2	1	.03	+	31.49	4.62E-02	5.26E-01
regulation of fibroblast proliferation (GO:0048145)	81	4	1.29	+	3.11	4.43E-02	5.26E-01
phytoalexin metabolic process (GO:0052314)	2	1	.03	+	31.49	4.62E-02	5.26E-01
protein import (GO:0017038)	158	6	2.51	+	2.39	4.43E-02	5.27E-01
regulation of organelle organization (GO:0033043)	1208	28	19.18	+	1.46	4.44E-02	5.27E-01
regulation of hematopoietic stem cell migration (GO:2000471)	2	1	.03	+	31.49	4.62E-02	5.27E-01
positive regulation of hematopoietic stem cell migration (GO:2000473)	2	1	.03	+	31.49	4.62E-02	5.27E-01
mitotic DNA integrity checkpoint signaling (GO:0044774)	123	5	1.95	+	2.56	5.07E-02	5.27E-01
DNA clamp unloading (GO:0090618)	2	1	.03	+	31.49	4.62E-02	5.28E-01
granulocyte colony-stimulating factor signaling pathway (GO:0038158)	2	1	.03	+	31.49	4.62E-02	5.28E-01
regulation of memory T cell activation (GO:2000567)	2	1	.03	+	31.49	4.62E-02	5.28E-01
positive regulation of memory T cell activation (GO:2000568)	2	1	.03	+	31.49	4.62E-02	5.29E-01
regulation of epithelial cell apoptotic process (GO:1904035)	85	4	1.35	+	2.96	5.09E-02	5.29E-01
geranyl diphosphate metabolic process (GO:0033383)	2	1	.03	+	31.49	4.62E-02	5.29E-01
geranyl diphosphate biosynthetic process (GO:0033384)	2	1	.03	+	31.49	4.62E-02	5.30E-01
regulation of actin cytoskeleton organization (GO:0032956)	358	11	5.68	+	1.94	5.11E-02	5.30E-01
vestibular receptor cell morphogenesis (GO:0060116)	2	1	.03	+	31.49	4.62E-02	5.30E-01
regulation of dipeptide transmembrane transport (GO:2001148)	2	1	.03	+	31.49	4.62E-02	5.30E-01
positive regulation of dipeptide transmembrane transport (GO:2001150)	2	1	.03	+	31.49	4.62E-02	5.31E-01
positive regulation of immune response (GO:0050778)	747	19	11.86	+	1.60	5.12E-02	5.31E-01
B cell negative selection (GO:0002352)	2	1	.03	+	31.49	4.62E-02	5.31E-01
B cell homeostatic proliferation (GO:0002358)	2	1	.03	+	31.49	4.62E-02	5.31E-01
regulation of ferroptosis (GO:0110075)	2	1	.03	+	31.49	4.62E-02	5.32E-01
negative regulation of ferroptosis (GO:0110076)	2	1	.03	+	31.49	4.62E-02	5.32E-01
positive regulation of transcription from RNA polymerase II promoter involved in smooth muscle cell differentiation (GO:2000721)	2	1	.03	+	31.49	4.62E-02	5.33E-01
negative regulation of activation of membrane attack complex (GO:0001971)	2	1	.03	+	31.49	4.62E-02	5.33E-01
glycine biosynthetic process from serine (GO:0019264)	2	1	.03	+	31.49	4.62E-02	5.33E-01
negative regulation of vasculogenesis (GO:2001213)	2	1	.03	+	31.49	4.62E-02	5.34E-01
immunoglobulin transcytosis in epithelial cells mediated by polymeric immunoglobulin receptor (GO:0002415)	2	1	.03	+	31.49	4.62E-02	5.34E-01
neuron recognition (GO:0008038)	48	3	.76	+	3.94	4.54E-02	5.34E-01
antigen processing and presentation of endogenous peptide antigen via MHC class II (GO:0002491)	2	1	.03	+	31.49	4.62E-02	5.35E-01
regulation of alcohol biosynthetic process (GO:1902930)	48	3	.76	+	3.94	4.54E-02	5.35E-01
deoxyinosine metabolic process (GO:0046094)	2	1	.03	+	31.49	4.62E-02	5.35E-01
Arp2/3 complex-mediated actin nucleation (GO:0034314)	20	2	.32	+	6.30	4.58E-02	5.35E-01
regulation of nitric-oxide synthase activity (GO:0050999)	48	3	.76	+	3.94	4.54E-02	5.35E-01
positive regulation of oligopeptide transport (GO:2000878)	2	1	.03	+	31.49	4.62E-02	5.35E-01
positive regulation of myeloid leukocyte mediated immunity (GO:0002888)	20	2	.32	+	6.30	4.58E-02	5.35E-01
regulation of release of cytochrome c from mitochondria (GO:0090199)	48	3	.76	+	3.94	4.54E-02	5.36E-01
positive regulation of dipeptide transport (GO:2000880)	2	1	.03	+	31.49	4.62E-02	5.36E-01
negative regulation of protein ubiquitination (GO:0031397)	82	4	1.30	+	3.07	4.59E-02	5.36E-01
maintenance of gastrointestinal epithelium (GO:0030277)	20	2	.32	+	6.30	4.58E-02	5.36E-01
regulation of filopodium assembly (GO:0051489)	48	3	.76	+	3.94	4.54E-02	5.36E-01
phenylacetate catabolic process (GO:0010124)	2	1	.03	+	31.49	4.62E-02	5.36E-01
negative regulation of nucleocytoplasmic transport (GO:0046823)	20	2	.32	+	6.30	4.58E-02	5.36E-01
regulation of protein autophosphorylation (GO:0031952)	48	3	.76	+	3.94	4.54E-02	5.36E-01
mitotic cell cycle (GO:0000278)	750	19	11.91	+	1.60	5.17E-02	5.36E-01
activation of blood coagulation via clotting cascade (GO:0002543)	2	1	.03	+	31.49	4.62E-02	5.37E-01
cellular transition metal ion homeostasis (GO:0046916)	119	5	1.89	+	2.65	4.54E-02	5.37E-01
serine family amino acid biosynthetic process (GO:0009070)	20	2	.32	+	6.30	4.58E-02	5.37E-01
cellular response to interleukin-12 (GO:0071349)	48	3	.76	+	3.94	4.54E-02	5.37E-01
negative regulation of cell adhesion involved in substrate-bound cell migration (GO:0006933)	2	1	.03	+	31.49	4.62E-02	5.37E-01
regulation of sequestering of calcium ion (GO:0051282)	119	5	1.89	+	2.65	4.54E-02	5.37E-01
plasma membrane phospholipid scrambling (GO:0017121)	20	2	.32	+	6.30	4.58E-02	5.37E-01
positive regulation of extrinsic apoptotic signaling pathway (GO:2001238)	48	3	.76	+	3.94	4.54E-02	5.37E-01
xanthine metabolic process (GO:0046110)	2	1	.03	+	31.49	4.62E-02	5.37E-01
mitotic DNA damage checkpoint signaling (GO:0044773)	119	5	1.89	+	2.65	4.54E-02	5.37E-01
mitochondrion morphogenesis (GO:0070584)	20	2	.32	+	6.30	4.58E-02	5.37E-01
glyceraldehyde-3-phosphate biosynthetic process (GO:0046166)	2	1	.03	+	31.49	4.62E-02	5.38E-01
signal transduction by p53 class mediator (GO:0072331)	119	5	1.89	+	2.65	4.54E-02	5.38E-01
negative regulation of oxidative stress-induced intrinsic apoptotic signaling pathway (GO:1902176)	20	2	.32	+	6.30	4.58E-02	5.38E-01
glycerol-3-phosphate catabolic process (GO:0046168)	2	1	.03	+	31.49	4.62E-02	5.38E-01
positive regulation of bone resorption (GO:0045780)	20	2	.32	+	6.30	4.58E-02	5.38E-01
beta-alanine biosynthetic process (GO:0019483)	2	1	.03	+	31.49	4.62E-02	5.39E-01
regulation of cell-matrix adhesion (GO:0001952)	124	5	1.97	+	2.54	5.21E-02	5.40E-01
regulation of vasculature development (GO:1901342)	286	9	4.54	+	1.98	5.24E-02	5.41E-01
negative regulation of myeloid leukocyte differentiation (GO:0002762)	51	3	.81	+	3.70	5.23E-02	5.41E-01
regulation of cell aging (GO:0090342)	51	3	.81	+	3.70	5.23E-02	5.41E-01
cellular pigmentation (GO:0033059)	51	3	.81	+	3.70	5.23E-02	5.42E-01
sensory perception of chemical stimulus (GO:0007606)	543	3	8.62	-	.35	5.26E-02	5.43E-01
positive regulation of protein binding (GO:0032092)	86	4	1.37	+	2.93	5.27E-02	5.43E-01
RNA biosynthetic process (GO:0032774)	543	3	8.62	-	.35	5.26E-02	5.43E-01
regulation of response to endoplasmic reticulum stress (GO:1905897)	86	4	1.37	+	2.93	5.27E-02	5.43E-01
negative regulation of cell differentiation (GO:0045596)	644	17	10.23	+	1.66	5.28E-02	5.44E-01
positive regulation of humoral immune response (GO:0002922)	22	2	.35	+	5.73	5.36E-02	5.45E-01
glycoside metabolic process (GO:0016137)	22	2	.35	+	5.73	5.36E-02	5.45E-01
polarized epithelial cell differentiation (GO:0030859)	22	2	.35	+	5.73	5.36E-02	5.46E-01
Rac protein signal transduction (GO:0016601)	22	2	.35	+	5.73	5.36E-02	5.46E-01
regulation of binding (GO:0051098)	365	11	5.80	+	1.90	5.31E-02	5.46E-01
establishment of melanosome localization (GO:0032401)	22	2	.35	+	5.73	5.36E-02	5.47E-01
glutathione derivative metabolic process (GO:1901685)	22	2	.35	+	5.73	5.36E-02	5.47E-01
glutathione derivative biosynthetic process (GO:1901687)	22	2	.35	+	5.73	5.36E-02	5.47E-01
pigment granule transport (GO:0051904)	22	2	.35	+	5.73	5.36E-02	5.48E-01
DNA recombination (GO:0006310)	225	0	3.57	-	< 0.01	5.39E-02	5.48E-01
reactive nitrogen species metabolic process (GO:2001057)	22	2	.35	+	5.73	5.36E-02	5.48E-01
negative regulation of mononuclear cell migration (GO:0071676)	22	2	.35	+	5.73	5.36E-02	5.48E-01
toll-like receptor 4 signaling pathway (GO:0034142)	22	2	.35	+	5.73	5.36E-02	5.49E-01
detection of stimulus involved in sensory perception (GO:0050906)	557	3	8.84	-	.34	5.40E-02	5.49E-01
regulation of hydrogen peroxide-induced cell death (GO:1903205)	22	2	.35	+	5.73	5.36E-02	5.49E-01
triglyceride biosynthetic process (GO:0019432)	22	2	.35	+	5.73	5.36E-02	5.49E-01
positive regulation of secretion by cell (GO:1903532)	288	9	4.57	+	1.97	5.36E-02	5.50E-01
regulation of inflammatory response to antigenic stimulus (GO:0002861)	222	0	3.52	-	< 0.01	5.36E-02	5.50E-01
positive regulation of NF-kappaB transcription factor activity (GO:0051092)	166	6	2.64	+	2.28	5.36E-02	5.50E-01
maintenance of location (GO:0051235)	166	6	2.64	+	2.28	5.36E-02	5.50E-01
phospholipid biosynthetic process (GO:0008654)	289	9	4.59	+	1.96	5.43E-02	5.50E-01
positive regulation of autophagy (GO:0010508)	125	5	1.98	+	2.52	5.36E-02	5.50E-01
regulation of protein-containing complex disassembly (GO:0043244)	125	5	1.98	+	2.52	5.36E-02	5.51E-01
protein-containing complex disassembly (GO:0032984)	228	0	3.62	-	< 0.01	5.44E-02	5.52E-01
pH reduction (GO:0045851)	52	3	.83	+	3.63	5.47E-02	5.54E-01
Golgi to plasma membrane transport (GO:0006893)	52	3	.83	+	3.63	5.47E-02	5.54E-01
regulation of lamellipodium organization (GO:1902743)	52	3	.83	+	3.63	5.47E-02	5.55E-01
nephron development (GO:0072006)	126	5	2.00	+	2.50	5.50E-02	5.56E-01
regulation of cellular catabolic process (GO:0031329)	899	22	14.27	+	1.54	5.50E-02	5.56E-01
negative regulation of regulated secretory pathway (GO:1903306)	24	2	.38	+	5.25	6.19E-02	5.59E-01
terminal web assembly (GO:1902896)	3	1	.05	+	20.99	6.11E-02	5.59E-01
negative regulation of protein kinase activity (GO:0006469)	241	8	3.83	+	2.09	6.19E-02	5.59E-01
negative regulation of heart growth (GO:0061117)	24	2	.38	+	5.25	6.19E-02	5.59E-01
formaldehyde catabolic process (GO:0046294)	3	1	.05	+	20.99	6.11E-02	5.59E-01
ammonium ion metabolic process (GO:0097164)	24	2	.38	+	5.25	6.19E-02	5.60E-01
regulation of homophilic cell adhesion (GO:1903385)	3	1	.05	+	20.99	6.11E-02	5.60E-01
positive regulation of dendrite extension (GO:1903861)	24	2	.38	+	5.25	6.19E-02	5.60E-01
methyl-branched fatty acid metabolic process (GO:0097089)	3	1	.05	+	20.99	6.11E-02	5.60E-01
cellular response to angiotensin (GO:1904385)	24	2	.38	+	5.25	6.19E-02	5.60E-01
negative regulation of tau-protein kinase activity (GO:1902948)	3	1	.05	+	20.99	6.11E-02	5.60E-01
negative regulation of cardiac muscle tissue growth (GO:0055022)	24	2	.38	+	5.25	6.19E-02	5.61E-01
negative regulation of aspartic-type endopeptidase activity involved in amyloid precursor protein catabolic process (GO:1902960)	3	1	.05	+	20.99	6.11E-02	5.61E-01
nucleotide-sugar biosynthetic process (GO:0009226)	24	2	.38	+	5.25	6.19E-02	5.61E-01
fasciculation of sensory neuron axon (GO:0097155)	3	1	.05	+	20.99	6.11E-02	5.61E-01
response to gamma radiation (GO:0010332)	55	3	.87	+	3.44	6.22E-02	5.61E-01
lipid catabolic process (GO:0016042)	299	9	4.75	+	1.90	6.13E-02	5.61E-01
energy coupled proton transport, down electrochemical gradient (GO:0015985)	24	2	.38	+	5.25	6.19E-02	5.61E-01
positive regulation of blood vessel endothelial cell migration (GO:0043536)	55	3	.87	+	3.44	6.22E-02	5.61E-01
pilomotor reflex (GO:0097195)	3	1	.05	+	20.99	6.11E-02	5.61E-01
ATP synthesis coupled proton transport (GO:0015986)	24	2	.38	+	5.25	6.19E-02	5.62E-01
cellular response to cAMP (GO:0071320)	55	3	.87	+	3.44	6.22E-02	5.62E-01
positive regulation of B cell apoptotic process (GO:0002904)	3	1	.05	+	20.99	6.11E-02	5.62E-01
positive regulation of nitric-oxide synthase activity (GO:0051000)	24	2	.38	+	5.25	6.19E-02	5.62E-01
positive regulation of protein tyrosine phosphatase activity (GO:1903615)	3	1	.05	+	20.99	6.11E-02	5.62E-01
protein demannosylation (GO:0036507)	24	2	.38	+	5.25	6.19E-02	5.62E-01
apoptotic process involved in luteolysis (GO:0061364)	3	1	.05	+	20.99	6.11E-02	5.62E-01
axonogenesis (GO:0007409)	385	11	6.11	+	1.80	6.15E-02	5.62E-01
protein alpha-1,2-demannosylation (GO:0036508)	24	2	.38	+	5.25	6.19E-02	5.62E-01
modulation by virus of host autophagy (GO:0039519)	3	1	.05	+	20.99	6.11E-02	5.63E-01
melanosome localization (GO:0032400)	24	2	.38	+	5.25	6.19E-02	5.63E-01
regulation of intrinsic apoptotic signaling pathway in response to hydrogen peroxide (GO:1903750)	3	1	.05	+	20.99	6.11E-02	5.63E-01
negative regulation of leukocyte mediated cytotoxicity (GO:0001911)	24	2	.38	+	5.25	6.19E-02	5.63E-01
negative regulation of intrinsic apoptotic signaling pathway in response to hydrogen peroxide (GO:1903751)	3	1	.05	+	20.99	6.11E-02	5.63E-01
regulation of proton transport (GO:0010155)	24	2	.38	+	5.25	6.19E-02	5.63E-01
positive regulation of potassium ion export across plasma membrane (GO:1903766)	3	1	.05	+	20.99	6.11E-02	5.64E-01
positive regulation of programmed cell death (GO:0043068)	575	15	9.13	+	1.64	6.17E-02	5.64E-01
positive regulation of protein localization to nucleus (GO:1900182)	91	4	1.44	+	2.77	6.18E-02	5.64E-01
response to lead ion (GO:0010288)	24	2	.38	+	5.25	6.19E-02	5.64E-01
regulation of CDP-diacylglycerol-serine O-phosphatidyltransferase activity (GO:1904217)	3	1	.05	+	20.99	6.11E-02	5.64E-01
defense response to Gram-negative bacterium (GO:0050829)	91	4	1.44	+	2.77	6.18E-02	5.64E-01
positive regulation of CDP-diacylglycerol-serine O-phosphatidyltransferase activity (GO:1904219)	3	1	.05	+	20.99	6.11E-02	5.64E-01
regulation of membrane permeability (GO:0090559)	91	4	1.44	+	2.77	6.18E-02	5.64E-01
positive regulation of serine C-palmitoyltransferase activity (GO:1904222)	3	1	.05	+	20.99	6.11E-02	5.65E-01
activation of cysteine-type endopeptidase activity involved in apoptotic process (GO:0006919)	91	4	1.44	+	2.77	6.18E-02	5.65E-01
regulation of substrate-dependent cell migration, cell attachment to substrate (GO:1904235)	3	1	.05	+	20.99	6.11E-02	5.65E-01
positive regulation of substrate-dependent cell migration, cell attachment to substrate (GO:1904237)	3	1	.05	+	20.99	6.11E-02	5.65E-01
programmed cell death in response to reactive oxygen species (GO:0097468)	3	1	.05	+	20.99	6.11E-02	5.66E-01
positive regulation of cellular amide metabolic process (GO:0034250)	168	6	2.67	+	2.25	5.61E-02	5.66E-01
serotonin biosynthetic process (GO:0042427)	3	1	.05	+	20.99	6.11E-02	5.66E-01
regulation of adaptive immune response based on somatic recombination of immune receptors built from immunoglobulin superfamily domains (GO:0002822)	168	6	2.67	+	2.25	5.61E-02	5.66E-01
synaptic vesicle to endosome fusion (GO:0016189)	3	1	.05	+	20.99	6.11E-02	5.66E-01
response to corticosteroid (GO:0031960)	168	6	2.67	+	2.25	5.61E-02	5.66E-01
Golgi apparatus mannose trimming (GO:1904381)	3	1	.05	+	20.99	6.11E-02	5.67E-01
mononuclear cell differentiation (GO:1903131)	292	9	4.64	+	1.94	5.63E-02	5.67E-01
isoprenoid transport (GO:0046864)	3	1	.05	+	20.99	6.11E-02	5.67E-01
female gonad development (GO:0008585)	88	4	1.40	+	2.86	5.62E-02	5.67E-01
terpenoid transport (GO:0046865)	3	1	.05	+	20.99	6.11E-02	5.67E-01
positive regulation of phosphatidylcholine metabolic process (GO:0150173)	3	1	.05	+	20.99	6.11E-02	5.68E-01
positive regulation of matrix metallopeptidase secretion (GO:1904466)	3	1	.05	+	20.99	6.11E-02	5.68E-01
pteridine-containing compound catabolic process (GO:0042560)	3	1	.05	+	20.99	6.11E-02	5.68E-01
purine nucleobase salvage (GO:0043096)	3	1	.05	+	20.99	6.11E-02	5.69E-01
lipoprotein particle mediated signaling (GO:0055095)	3	1	.05	+	20.99	6.11E-02	5.69E-01
low-density lipoprotein particle mediated signaling (GO:0055096)	3	1	.05	+	20.99	6.11E-02	5.69E-01
meiotic chromosome movement towards spindle pole (GO:0016344)	3	1	.05	+	20.99	6.11E-02	5.70E-01
regulation of glial cell-derived neurotrophic factor production (GO:1900166)	3	1	.05	+	20.99	6.11E-02	5.70E-01
positive regulation of glial cell-derived neurotrophic factor production (GO:1900168)	3	1	.05	+	20.99	6.11E-02	5.70E-01
negative regulation of transcription by RNA polymerase III (GO:0016480)	3	1	.05	+	20.99	6.11E-02	5.71E-01
ribonucleoprotein complex biogenesis (GO:0022613)	462	13	7.34	+	1.77	5.67E-02	5.71E-01
response to methionine (GO:1904640)	3	1	.05	+	20.99	6.11E-02	5.71E-01
folic acid-containing compound catabolic process (GO:0009397)	3	1	.05	+	20.99	6.11E-02	5.71E-01
pyridoxal phosphate metabolic process (GO:0042822)	3	1	.05	+	20.99	6.11E-02	5.72E-01
regulation of cytotoxic T cell degranulation (GO:0043317)	3	1	.05	+	20.99	6.11E-02	5.72E-01
negative regulation of cytotoxic T cell degranulation (GO:0043318)	3	1	.05	+	20.99	6.11E-02	5.72E-01
protein unfolding (GO:0043335)	3	1	.05	+	20.99	6.11E-02	5.73E-01
calcium ion transport (GO:0006816)	244	8	3.87	+	2.06	6.36E-02	5.73E-01
response to hydrogen sulfide (GO:1904880)	3	1	.05	+	20.99	6.11E-02	5.73E-01
transmembrane transport (GO:0055085)	1276	29	20.26	+	1.43	6.37E-02	5.73E-01
homocysteine catabolic process (GO:0043418)	3	1	.05	+	20.99	6.11E-02	5.73E-01
phospholipid transport (GO:0015914)	92	4	1.46	+	2.74	6.38E-02	5.73E-01
response to trichostatin A (GO:0035983)	3	1	.05	+	20.99	6.11E-02	5.74E-01
pigmentation (GO:0043473)	92	4	1.46	+	2.74	6.38E-02	5.74E-01
cellular response to trichostatin A (GO:0035984)	3	1	.05	+	20.99	6.11E-02	5.74E-01
hypothalamus development (GO:0021854)	23	2	.37	+	5.48	5.77E-02	5.74E-01
establishment of protein localization to vacuole (GO:0072666)	53	3	.84	+	3.56	5.72E-02	5.74E-01
insulin catabolic process (GO:1901143)	3	1	.05	+	20.99	6.11E-02	5.74E-01
muscle cell migration (GO:0014812)	23	2	.37	+	5.48	5.77E-02	5.74E-01
positive regulation of apoptotic process (GO:0043065)	560	15	8.89	+	1.69	5.71E-02	5.75E-01
negative regulation of peptidyl-tyrosine phosphorylation (GO:0050732)	53	3	.84	+	3.56	5.72E-02	5.75E-01
post-embryonic camera-type eye morphogenesis (GO:0048597)	3	1	.05	+	20.99	6.11E-02	5.75E-01
regulation of Rac protein signal transduction (GO:0035020)	23	2	.37	+	5.48	5.77E-02	5.75E-01
cellular response to potassium ion starvation (GO:0051365)	3	1	.05	+	20.99	6.11E-02	5.75E-01
astrocyte differentiation (GO:0048708)	53	3	.84	+	3.56	5.72E-02	5.75E-01
negative regulation of Rho protein signal transduction (GO:0035024)	23	2	.37	+	5.48	5.77E-02	5.75E-01
response to platinum ion (GO:0070541)	3	1	.05	+	20.99	6.11E-02	5.75E-01
aspartate family amino acid catabolic process (GO:0009068)	23	2	.37	+	5.48	5.77E-02	5.75E-01
positive regulation of anaphase-promoting complex-dependent catabolic process (GO:1905786)	3	1	.05	+	20.99	6.11E-02	5.76E-01
axon regeneration (GO:0031103)	23	2	.37	+	5.48	5.77E-02	5.76E-01
hexitol metabolic process (GO:0006059)	3	1	.05	+	20.99	6.11E-02	5.76E-01
ubiquitin-dependent protein catabolic process via the multivesicular body sorting pathway (GO:0043162)	23	2	.37	+	5.48	5.77E-02	5.76E-01
midbrain development (GO:0030901)	89	4	1.41	+	2.83	5.81E-02	5.76E-01
regulation of protein phosphorylation (GO:0001932)	1218	28	19.34	+	1.45	5.80E-02	5.76E-01
protein polyglycylation (GO:0018094)	3	1	.05	+	20.99	6.11E-02	5.76E-01
dendritic cell migration (GO:0036336)	23	2	.37	+	5.48	5.77E-02	5.77E-01
postsynapse organization (GO:0099173)	89	4	1.41	+	2.83	5.81E-02	5.77E-01
fumarate metabolic process (GO:0006106)	3	1	.05	+	20.99	6.11E-02	5.77E-01
negative regulation of defense response to virus (GO:0050687)	23	2	.37	+	5.48	5.77E-02	5.77E-01
neural crest cell differentiation (GO:0014033)	89	4	1.41	+	2.83	5.81E-02	5.77E-01
purine nucleobase catabolic process (GO:0006145)	3	1	.05	+	20.99	6.11E-02	5.77E-01
membrane raft organization (GO:0031579)	23	2	.37	+	5.48	5.77E-02	5.77E-01
deoxyadenosine catabolic process (GO:0006157)	3	1	.05	+	20.99	6.11E-02	5.77E-01
positive regulation of monocyte chemotaxis (GO:0090026)	23	2	.37	+	5.48	5.77E-02	5.78E-01
female genitalia morphogenesis (GO:0048807)	3	1	.05	+	20.99	6.11E-02	5.78E-01
negative regulation of multi-organism process (GO:0043901)	23	2	.37	+	5.48	5.77E-02	5.78E-01
regulation of protein catabolic process at postsynapse, modulating synaptic transmission (GO:0099576)	3	1	.05	+	20.99	6.11E-02	5.78E-01
positive regulation of neurotransmitter transport (GO:0051590)	23	2	.37	+	5.48	5.77E-02	5.78E-01
regulation of translation at postsynapse, modulating synaptic transmission (GO:0099578)	3	1	.05	+	20.99	6.11E-02	5.78E-01
establishment of pigment granule localization (GO:0051905)	23	2	.37	+	5.48	5.77E-02	5.79E-01
regulation of adenylate cyclase-activating adrenergic receptor signaling pathway involved in heart process (GO:0140192)	3	1	.05	+	20.99	6.11E-02	5.79E-01
negative regulation of adenylate cyclase-activating adrenergic receptor signaling pathway involved in heart process (GO:0140199)	3	1	.05	+	20.99	6.11E-02	5.79E-01
branching involved in mammary gland duct morphogenesis (GO:0060444)	23	2	.37	+	5.48	5.77E-02	5.79E-01
regulation of protein modification process (GO:0031399)	1654	36	26.26	+	1.37	6.45E-02	5.79E-01
regulation of platelet-derived growth factor production (GO:0090361)	3	1	.05	+	20.99	6.11E-02	5.79E-01
regulation of germ cell proliferation (GO:1905936)	3	1	.05	+	20.99	6.11E-02	5.80E-01
regulation of male germ cell proliferation (GO:2000254)	3	1	.05	+	20.99	6.11E-02	5.80E-01
regulation of translation at postsynapse (GO:0140245)	3	1	.05	+	20.99	6.11E-02	5.80E-01
leukocyte migration (GO:0050900)	379	11	6.02	+	1.83	5.86E-02	5.81E-01
negative regulation of lymphocyte chemotaxis (GO:1901624)	3	1	.05	+	20.99	6.11E-02	5.81E-01
response to nutrient (GO:0007584)	170	6	2.70	+	2.22	5.86E-02	5.81E-01
isoquinoline alkaloid metabolic process (GO:0033076)	3	1	.05	+	20.99	6.11E-02	5.81E-01
regulation of tumor necrosis factor (ligand) superfamily member 11 production (GO:2000307)	3	1	.05	+	20.99	6.11E-02	5.82E-01
regulation of glucose import (GO:0046324)	56	3	.89	+	3.37	6.48E-02	5.82E-01
regulation of prostaglandin-E synthase activity (GO:2000361)	3	1	.05	+	20.99	6.11E-02	5.82E-01
negative regulation of coagulation (GO:0050819)	56	3	.89	+	3.37	6.48E-02	5.82E-01
positive regulation of prostaglandin-E synthase activity (GO:2000363)	3	1	.05	+	20.99	6.11E-02	5.82E-01
alcohol catabolic process (GO:0046164)	56	3	.89	+	3.37	6.48E-02	5.82E-01
positive regulation of L-glutamate import across plasma membrane (GO:0002038)	3	1	.05	+	20.99	6.11E-02	5.83E-01
RNA import into nucleus (GO:0006404)	3	1	.05	+	20.99	6.11E-02	5.83E-01
establishment or maintenance of neuroblast polarity (GO:0045196)	3	1	.05	+	20.99	6.11E-02	5.83E-01
insulin receptor internalization (GO:0038016)	3	1	.05	+	20.99	6.11E-02	5.84E-01
apoptotic process involved in embryonic digit morphogenesis (GO:1902263)	3	1	.05	+	20.99	6.11E-02	5.84E-01
regulation of macrophage migration inhibitory factor signaling pathway (GO:2000446)	3	1	.05	+	20.99	6.11E-02	5.84E-01
regulation of protein kinase B signaling (GO:0051896)	235	8	3.73	+	2.14	5.91E-02	5.85E-01
establishment of neuroblast polarity (GO:0045200)	3	1	.05	+	20.99	6.11E-02	5.85E-01
mitochondrial transport (GO:0006839)	235	8	3.73	+	2.14	5.91E-02	5.85E-01
zonula adherens maintenance (GO:0045218)	3	1	.05	+	20.99	6.11E-02	5.85E-01
regulation of amino acid uptake involved in synaptic transmission (GO:0051941)	3	1	.05	+	20.99	6.11E-02	5.85E-01
regulation of glutamate uptake involved in transmission of nerve impulse (GO:0051946)	3	1	.05	+	20.99	6.11E-02	5.86E-01
aspartate biosynthetic process (GO:0006532)	3	1	.05	+	20.99	6.11E-02	5.86E-01
positive regulation of low-density lipoprotein particle receptor catabolic process (GO:0032805)	3	1	.05	+	20.99	6.11E-02	5.86E-01
positive regulation of apoptotic process involved in mammary gland involution (GO:0060058)	3	1	.05	+	20.99	6.11E-02	5.87E-01
vestibular receptor cell differentiation (GO:0060114)	3	1	.05	+	20.99	6.11E-02	5.87E-01
response to acidic pH (GO:0010447)	25	2	.40	+	5.04	6.62E-02	5.88E-01
regulation of mitochondrial membrane permeability involved in programmed necrotic cell death (GO:1902445)	3	1	.05	+	20.99	6.11E-02	5.88E-01
endochondral bone growth (GO:0003416)	25	2	.40	+	5.04	6.62E-02	5.88E-01
vestibular receptor cell development (GO:0060118)	3	1	.05	+	20.99	6.11E-02	5.88E-01
vesicle-mediated transport in synapse (GO:0099003)	129	5	2.05	+	2.44	5.95E-02	5.88E-01
positive regulation of lipid storage (GO:0010884)	25	2	.40	+	5.04	6.62E-02	5.88E-01
positive regulation of adenosine receptor signaling pathway (GO:0060168)	3	1	.05	+	20.99	6.11E-02	5.88E-01
B cell receptor signaling pathway (GO:0050853)	129	5	2.05	+	2.44	5.95E-02	5.88E-01
long-chain fatty-acyl-CoA metabolic process (GO:0035336)	25	2	.40	+	5.04	6.62E-02	5.89E-01
endomitotic cell cycle (GO:0007113)	3	1	.05	+	20.99	6.11E-02	5.89E-01
3'-phosphoadenosine 5'-phosphosulfate metabolic process (GO:0050427)	25	2	.40	+	5.04	6.62E-02	5.89E-01
plasma cell differentiation (GO:0002317)	3	1	.05	+	20.99	6.11E-02	5.89E-01
regulation of protein kinase activity (GO:0045859)	802	20	12.73	+	1.57	5.97E-02	5.89E-01
regulation of lipopolysaccharide-mediated signaling pathway (GO:0031664)	25	2	.40	+	5.04	6.62E-02	5.89E-01
proton transmembrane transport (GO:1902600)	133	5	2.11	+	2.37	6.58E-02	5.89E-01
cyclic-nucleotide-mediated signaling (GO:0019935)	54	3	.86	+	3.50	5.97E-02	5.89E-01
peripheral B cell selection (GO:0002343)	3	1	.05	+	20.99	6.11E-02	5.89E-01
development of primary female sexual characteristics (GO:0046545)	93	4	1.48	+	2.71	6.57E-02	5.89E-01
regulation of mitochondrial membrane permeability involved in apoptotic process (GO:1902108)	25	2	.40	+	5.04	6.62E-02	5.90E-01
intracellular transport of virus (GO:0075733)	54	3	.86	+	3.50	5.97E-02	5.90E-01
B cell affinity maturation (GO:0002344)	3	1	.05	+	20.99	6.11E-02	5.90E-01
response to dietary excess (GO:0002021)	25	2	.40	+	5.04	6.62E-02	5.90E-01
cellular response to alcohol (GO:0097306)	90	4	1.43	+	2.80	5.99E-02	5.90E-01
head development (GO:0060322)	803	20	12.75	+	1.57	5.98E-02	5.90E-01
histamine production involved in inflammatory response (GO:0002349)	3	1	.05	+	20.99	6.11E-02	5.90E-01
positive regulation of cation transmembrane transport (GO:1904064)	171	6	2.72	+	2.21	5.99E-02	5.90E-01
pigment granule localization (GO:0051875)	25	2	.40	+	5.04	6.62E-02	5.90E-01
signal transduction downstream of smoothened (GO:0007227)	3	1	.05	+	20.99	6.11E-02	5.90E-01
biological process involved in interspecies interaction between organisms (GO:0044419)	1593	35	25.29	+	1.38	5.99E-02	5.91E-01
regulation of establishment or maintenance of cell polarity (GO:0032878)	25	2	.40	+	5.04	6.62E-02	5.91E-01
positive regulation of hh target transcription factor activity (GO:0007228)	3	1	.05	+	20.99	6.11E-02	5.91E-01
late endosome to vacuole transport (GO:0045324)	25	2	.40	+	5.04	6.62E-02	5.91E-01
intestinal D-glucose absorption (GO:0001951)	3	1	.05	+	20.99	6.11E-02	5.91E-01
regulation of superoxide anion generation (GO:0032928)	25	2	.40	+	5.04	6.62E-02	5.91E-01
regulation of activation of membrane attack complex (GO:0001969)	3	1	.05	+	20.99	6.11E-02	5.92E-01
lipid modification (GO:0030258)	176	6	2.79	+	2.15	6.67E-02	5.92E-01
purine ribonucleoside bisphosphate metabolic process (GO:0034035)	25	2	.40	+	5.04	6.62E-02	5.92E-01
Ras protein signal transduction (GO:0007265)	176	6	2.79	+	2.15	6.67E-02	5.92E-01
mitochondrial calcium ion transmembrane transport (GO:0006851)	25	2	.40	+	5.04	6.62E-02	5.92E-01
negative regulation of ER-associated ubiquitin-dependent protein catabolic process (GO:1903070)	3	1	.05	+	20.99	6.11E-02	5.92E-01
GTP metabolic process (GO:0046039)	25	2	.40	+	5.04	6.62E-02	5.92E-01
isopentenyl diphosphate biosynthetic process, mevalonate pathway (GO:0019287)	3	1	.05	+	20.99	6.11E-02	5.92E-01
regulation of heterotypic cell-cell adhesion (GO:0034114)	25	2	.40	+	5.04	6.62E-02	5.93E-01
positive regulation of phosphatidylcholine biosynthetic process (GO:2001247)	3	1	.05	+	20.99	6.11E-02	5.93E-01
immunoglobulin transcytosis in epithelial cells (GO:0002414)	3	1	.05	+	20.99	6.11E-02	5.93E-01
histamine secretion involved in inflammatory response (GO:0002441)	3	1	.05	+	20.99	6.11E-02	5.93E-01
regulation of nitrogen utilization (GO:0006808)	3	1	.05	+	20.99	6.11E-02	5.94E-01
negative regulation of transferase activity (GO:0051348)	306	9	4.86	+	1.85	6.70E-02	5.94E-01
myeloid dendritic cell antigen processing and presentation (GO:0002469)	3	1	.05	+	20.99	6.11E-02	5.94E-01
antigen processing and presentation of exogenous peptide antigen via MHC class Ib (GO:0002477)	3	1	.05	+	20.99	6.11E-02	5.94E-01
assembly of large subunit precursor of preribosome (GO:1902626)	3	1	.05	+	20.99	6.11E-02	5.95E-01
odontoblast differentiation (GO:0071895)	3	1	.05	+	20.99	6.11E-02	5.95E-01
GMP catabolic process (GO:0046038)	3	1	.05	+	20.99	6.11E-02	5.96E-01
adenine metabolic process (GO:0046083)	3	1	.05	+	20.99	6.11E-02	5.96E-01
adenine biosynthetic process (GO:0046084)	3	1	.05	+	20.99	6.11E-02	5.96E-01
deoxyadenosine metabolic process (GO:0046090)	3	1	.05	+	20.99	6.11E-02	5.97E-01
histamine secretion by mast cell (GO:0002553)	3	1	.05	+	20.99	6.11E-02	5.97E-01
response to lipid hydroperoxide (GO:0006982)	3	1	.05	+	20.99	6.11E-02	5.97E-01
lung goblet cell differentiation (GO:0060480)	3	1	.05	+	20.99	6.11E-02	5.98E-01
regulation of myeloid leukocyte mediated immunity (GO:0002886)	57	3	.91	+	3.31	6.75E-02	5.98E-01
negative regulation of forebrain neuron differentiation (GO:2000978)	3	1	.05	+	20.99	6.11E-02	5.98E-01
cellular component maintenance (GO:0043954)	57	3	.91	+	3.31	6.75E-02	5.98E-01
regulation of calcium ion-dependent exocytosis of neurotransmitter (GO:1903233)	3	1	.05	+	20.99	6.11E-02	5.98E-01
glycine decarboxylation via glycine cleavage system (GO:0019464)	3	1	.05	+	20.99	6.11E-02	5.99E-01
regulation of glutamate secretion, neurotransmission (GO:1903294)	3	1	.05	+	20.99	6.11E-02	5.99E-01
negative regulation of protein modification by small protein conjugation or removal (GO:1903321)	94	4	1.49	+	2.68	6.77E-02	5.99E-01
positive regulation of glutamate secretion, neurotransmission (GO:1903296)	3	1	.05	+	20.99	6.11E-02	6.00E-01
negative regulation of cellular amino acid metabolic process (GO:0045763)	3	1	.05	+	20.99	6.11E-02	6.00E-01
pattern recognition receptor signaling pathway (GO:0002221)	130	5	2.06	+	2.42	6.10E-02	6.00E-01
response to vitamin B1 (GO:0010266)	3	1	.05	+	20.99	6.11E-02	6.00E-01
positive regulation of binding (GO:0051099)	177	6	2.81	+	2.13	6.81E-02	6.02E-01
regulation of proteasomal ubiquitin-dependent protein catabolic process (GO:0032434)	135	5	2.14	+	2.33	6.90E-02	6.10E-01
regulation of synaptic vesicle exocytosis (GO:2000300)	60	3	.95	+	3.15	7.58E-02	6.14E-01
regulation of monooxygenase activity (GO:0032768)	60	3	.95	+	3.15	7.58E-02	6.14E-01
regulation of cell cycle G1/S phase transition (GO:1902806)	178	6	2.83	+	2.12	6.95E-02	6.14E-01
positive regulation of intrinsic apoptotic signaling pathway (GO:2001244)	60	3	.95	+	3.15	7.58E-02	6.14E-01
formaldehyde metabolic process (GO:0046292)	4	1	.06	+	15.75	7.57E-02	6.14E-01
propionate metabolic process (GO:0019541)	4	1	.06	+	15.75	7.57E-02	6.15E-01
positive regulation of endoplasmic reticulum tubular network organization (GO:1903373)	4	1	.06	+	15.75	7.57E-02	6.15E-01
modulation of chemical synaptic transmission (GO:0050804)	431	12	6.84	+	1.75	7.60E-02	6.15E-01
regulation of cytokine production involved in immune response (GO:0002718)	98	4	1.56	+	2.57	7.60E-02	6.15E-01
regulation of protein refolding (GO:0061083)	4	1	.06	+	15.75	7.57E-02	6.15E-01
negative regulation of protein refolding (GO:0061084)	4	1	.06	+	15.75	7.57E-02	6.16E-01
selenocysteinyl-tRNA(Sec) biosynthetic process (GO:0097056)	4	1	.06	+	15.75	7.57E-02	6.16E-01
negative regulation of T cell mediated immunity (GO:0002710)	26	2	.41	+	4.84	7.05E-02	6.16E-01
regulation of cholesterol import (GO:0060620)	4	1	.06	+	15.75	7.57E-02	6.16E-01
antigen processing and presentation of endogenous antigen (GO:0019883)	26	2	.41	+	4.84	7.05E-02	6.16E-01
negative regulation of dendritic spine maintenance (GO:1902951)	4	1	.06	+	15.75	7.57E-02	6.17E-01
negative regulation of cardiac muscle hypertrophy (GO:0010614)	26	2	.41	+	4.84	7.05E-02	6.17E-01
positive regulation of dendritic spine maintenance (GO:1902952)	4	1	.06	+	15.75	7.57E-02	6.17E-01
glutamine family amino acid catabolic process (GO:0009065)	26	2	.41	+	4.84	7.05E-02	6.17E-01
response to organophosphorus (GO:0046683)	136	5	2.16	+	2.32	7.07E-02	6.17E-01
regulation of trans-synaptic signaling (GO:0099177)	432	12	6.86	+	1.75	7.63E-02	6.17E-01
smoothened signaling pathway involved in ventral spinal cord patterning (GO:0021910)	4	1	.06	+	15.75	7.57E-02	6.17E-01
benzene-containing compound metabolic process (GO:0042537)	26	2	.41	+	4.84	7.05E-02	6.17E-01
formation of radial glial scaffolds (GO:0021943)	4	1	.06	+	15.75	7.57E-02	6.18E-01
regulation of hair cycle (GO:0042634)	26	2	.41	+	4.84	7.05E-02	6.18E-01
pancreas morphogenesis (GO:0061113)	4	1	.06	+	15.75	7.57E-02	6.18E-01
deoxyribonucleotide catabolic process (GO:0009264)	26	2	.41	+	4.84	7.05E-02	6.18E-01
negative regulation of catecholamine metabolic process (GO:0045914)	4	1	.06	+	15.75	7.57E-02	6.18E-01
positive regulation of transcription from RNA polymerase II promoter in response to stress (GO:0036003)	26	2	.41	+	4.84	7.05E-02	6.18E-01
negative regulation of dopamine metabolic process (GO:0045963)	4	1	.06	+	15.75	7.57E-02	6.18E-01
response to ischemia (GO:0002931)	58	3	.92	+	3.26	7.02E-02	6.19E-01
mesodermal cell differentiation (GO:0048333)	26	2	.41	+	4.84	7.05E-02	6.19E-01
negative regulation of response to tumor cell (GO:0002835)	4	1	.06	+	15.75	7.57E-02	6.19E-01
lymphocyte differentiation (GO:0030098)	254	8	4.03	+	1.98	7.01E-02	6.19E-01
positive regulation of establishment of protein localization to mitochondrion (GO:1903749)	58	3	.92	+	3.26	7.02E-02	6.19E-01
lens fiber cell differentiation (GO:0070306)	26	2	.41	+	4.84	7.05E-02	6.19E-01
negative regulation of immune response to tumor cell (GO:0002838)	4	1	.06	+	15.75	7.57E-02	6.19E-01
ion transmembrane transport (GO:0034220)	870	21	13.81	+	1.52	7.03E-02	6.19E-01
glycerolipid metabolic process (GO:0046486)	400	11	6.35	+	1.73	7.04E-02	6.19E-01
negative regulation of chemotaxis (GO:0050922)	58	3	.92	+	3.26	7.02E-02	6.19E-01
AMPA glutamate receptor clustering (GO:0097113)	4	1	.06	+	15.75	7.57E-02	6.19E-01
glycoprotein catabolic process (GO:0006516)	26	2	.41	+	4.84	7.05E-02	6.19E-01
negative regulation of hydrolase activity (GO:0051346)	401	11	6.37	+	1.73	7.10E-02	6.20E-01
positive regulation of cell-matrix adhesion (GO:0001954)	58	3	.92	+	3.26	7.02E-02	6.20E-01
steroid esterification (GO:0034433)	4	1	.06	+	15.75	7.57E-02	6.20E-01
synaptic transmission, cholinergic (GO:0007271)	26	2	.41	+	4.84	7.05E-02	6.20E-01
sterol esterification (GO:0034434)	4	1	.06	+	15.75	7.57E-02	6.20E-01
positive regulation of epidermal cell differentiation (GO:0045606)	26	2	.41	+	4.84	7.05E-02	6.20E-01
cholesterol esterification (GO:0034435)	4	1	.06	+	15.75	7.57E-02	6.20E-01
positive regulation of osteoclast differentiation (GO:0045672)	26	2	.41	+	4.84	7.05E-02	6.20E-01
negative regulation of leukocyte activation (GO:0002695)	183	6	2.91	+	2.06	7.69E-02	6.21E-01
regulation of branching involved in mammary gland duct morphogenesis (GO:0060762)	4	1	.06	+	15.75	7.57E-02	6.21E-01
response to interferon-gamma (GO:0034341)	183	6	2.91	+	2.06	7.69E-02	6.21E-01
activation of cysteine-type endopeptidase activity involved in apoptotic signaling pathway (GO:0097296)	4	1	.06	+	15.75	7.57E-02	6.21E-01
regulation of adaptive immune response (GO:0002819)	183	6	2.91	+	2.06	7.69E-02	6.21E-01
establishment of Sertoli cell barrier (GO:0097368)	4	1	.06	+	15.75	7.57E-02	6.21E-01
protein modification by small protein conjugation or removal (GO:0070647)	1035	9	16.43	-	.55	7.13E-02	6.21E-01
positive regulation of adipose tissue development (GO:1904179)	4	1	.06	+	15.75	7.57E-02	6.22E-01
response to pyrethroid (GO:0046684)	4	1	.06	+	15.75	7.57E-02	6.22E-01
embryonic heart tube left/right pattern formation (GO:0060971)	4	1	.06	+	15.75	7.57E-02	6.22E-01
regulation of collagen catabolic process (GO:0010710)	4	1	.06	+	15.75	7.57E-02	6.23E-01
clathrin-dependent synaptic vesicle endocytosis (GO:0150007)	4	1	.06	+	15.75	7.57E-02	6.23E-01
positive regulation of PERK-mediated unfolded protein response (GO:1903899)	4	1	.06	+	15.75	7.57E-02	6.23E-01
calcium activated phosphatidylserine scrambling (GO:0061589)	4	1	.06	+	15.75	7.57E-02	6.24E-01
regulation of cellular protein catabolic process (GO:1903362)	256	8	4.06	+	1.97	7.16E-02	6.24E-01
pentose-phosphate shunt, oxidative branch (GO:0009051)	4	1	.06	+	15.75	7.57E-02	6.24E-01
regulation of establishment of T cell polarity (GO:1903903)	4	1	.06	+	15.75	7.57E-02	6.24E-01
regulation of lymphocyte activation (GO:0051249)	536	14	8.51	+	1.65	7.74E-02	6.24E-01
negative regulation of very-low-density lipoprotein particle remodeling (GO:0010903)	4	1	.06	+	15.75	7.57E-02	6.25E-01
regulation of cell morphogenesis involved in differentiation (GO:0010769)	96	4	1.52	+	2.62	7.18E-02	6.25E-01
glutamate receptor clustering (GO:0097688)	4	1	.06	+	15.75	7.57E-02	6.25E-01
regulation of cellular pH (GO:0030641)	96	4	1.52	+	2.62	7.18E-02	6.25E-01
aminergic neurotransmitter loading into synaptic vesicle (GO:0015842)	4	1	.06	+	15.75	7.57E-02	6.25E-01
maintenance of location in cell (GO:0051651)	96	4	1.52	+	2.62	7.18E-02	6.25E-01
adenine transport (GO:0015853)	4	1	.06	+	15.75	7.57E-02	6.26E-01
regulation of Notch signaling pathway involved in heart induction (GO:0035480)	4	1	.06	+	15.75	7.57E-02	6.26E-01
protein-containing complex assembly (GO:0065003)	1358	30	21.56	+	1.39	7.20E-02	6.26E-01
positive regulation of Notch signaling pathway involved in heart induction (GO:0035481)	4	1	.06	+	15.75	7.57E-02	6.26E-01
negative regulation of macromolecule biosynthetic process (GO:0010558)	1551	16	24.63	-	.65	7.20E-02	6.26E-01
response to caloric restriction (GO:0061771)	4	1	.06	+	15.75	7.57E-02	6.27E-01
regulation of cardiolipin metabolic process (GO:1900208)	4	1	.06	+	15.75	7.57E-02	6.27E-01
Tie signaling pathway (GO:0048014)	4	1	.06	+	15.75	7.57E-02	6.27E-01
D-xylose metabolic process (GO:0042732)	4	1	.06	+	15.75	7.57E-02	6.28E-01
negative regulation of metalloendopeptidase activity (GO:1904684)	4	1	.06	+	15.75	7.57E-02	6.28E-01
medium-chain fatty-acyl-CoA metabolic process (GO:0036112)	4	1	.06	+	15.75	7.57E-02	6.28E-01
fatty-acyl-CoA catabolic process (GO:0036115)	4	1	.06	+	15.75	7.57E-02	6.29E-01
L-alanine metabolic process (GO:0042851)	4	1	.06	+	15.75	7.57E-02	6.29E-01
L-alanine catabolic process (GO:0042853)	4	1	.06	+	15.75	7.57E-02	6.29E-01
response to tetrachloromethane (GO:1904772)	4	1	.06	+	15.75	7.57E-02	6.30E-01
positive regulation of neutrophil degranulation (GO:0043315)	4	1	.06	+	15.75	7.57E-02	6.30E-01
negative regulation of kinase activity (GO:0033673)	264	8	4.19	+	1.91	7.81E-02	6.30E-01
nucleobase-containing small molecule biosynthetic process (GO:0034404)	99	4	1.57	+	2.54	7.82E-02	6.30E-01
negative regulation of aspartic-type peptidase activity (GO:1905246)	4	1	.06	+	15.75	7.57E-02	6.30E-01
response to L-glutamine (GO:1904844)	4	1	.06	+	15.75	7.57E-02	6.31E-01
snRNA transport (GO:0051030)	4	1	.06	+	15.75	7.57E-02	6.31E-01
response to flavonoid (GO:1905395)	4	1	.06	+	15.75	7.57E-02	6.31E-01
mucus secretion (GO:0070254)	4	1	.06	+	15.75	7.57E-02	6.32E-01
pattern specification process (GO:0007389)	426	2	6.76	-	.30	7.27E-02	6.32E-01
positive regulation of sulfur metabolic process (GO:0051176)	4	1	.06	+	15.75	7.57E-02	6.32E-01
cell death in response to hydrogen peroxide (GO:0036474)	4	1	.06	+	15.75	7.57E-02	6.32E-01
mammary gland epithelium development (GO:0061180)	59	3	.94	+	3.20	7.30E-02	6.32E-01
cellular amide catabolic process (GO:0043605)	4	1	.06	+	15.75	7.57E-02	6.33E-01
positive regulation of dephosphorylation (GO:0035306)	59	3	.94	+	3.20	7.30E-02	6.33E-01
regulation of negative chemotaxis (GO:0050923)	4	1	.06	+	15.75	7.57E-02	6.33E-01
sprouting angiogenesis (GO:0002040)	59	3	.94	+	3.20	7.30E-02	6.33E-01
transport of virus (GO:0046794)	61	3	.97	+	3.10	7.86E-02	6.33E-01
histone succinylation (GO:0106077)	4	1	.06	+	15.75	7.57E-02	6.33E-01
regulation of lipid catabolic process (GO:0050994)	61	3	.97	+	3.10	7.86E-02	6.33E-01
response to zinc ion (GO:0010043)	59	3	.94	+	3.20	7.30E-02	6.33E-01
regulation of histone H2A K63-linked ubiquitination (GO:1901314)	4	1	.06	+	15.75	7.57E-02	6.34E-01
positive regulation of RNA metabolic process (GO:0051254)	1773	19	28.15	-	.67	7.32E-02	6.34E-01
negative regulation of histone H2A K63-linked ubiquitination (GO:1901315)	4	1	.06	+	15.75	7.57E-02	6.34E-01
Golgi reassembly (GO:0090168)	4	1	.06	+	15.75	7.57E-02	6.34E-01
regulation of smooth muscle cell-matrix adhesion (GO:2000097)	4	1	.06	+	15.75	7.57E-02	6.35E-01
regulation of arginine metabolic process (GO:0000821)	4	1	.06	+	15.75	7.57E-02	6.35E-01
negative regulation of muscle hypertrophy (GO:0014741)	28	2	.44	+	4.50	7.96E-02	6.35E-01
adenosine catabolic process (GO:0006154)	4	1	.06	+	15.75	7.57E-02	6.35E-01
epithelial cell apoptotic process (GO:1904019)	28	2	.44	+	4.50	7.96E-02	6.35E-01
peptidyl-glutamine modification (GO:0018199)	4	1	.06	+	15.75	7.57E-02	6.36E-01
isoprenoid biosynthetic process (GO:0008299)	28	2	.44	+	4.50	7.96E-02	6.36E-01
positive regulation of mitophagy (GO:1901526)	4	1	.06	+	15.75	7.57E-02	6.36E-01
epithelial structure maintenance (GO:0010669)	28	2	.44	+	4.50	7.96E-02	6.36E-01
positive regulation of amyloid fibril formation (GO:1905908)	4	1	.06	+	15.75	7.57E-02	6.36E-01
positive regulation of collagen metabolic process (GO:0010714)	28	2	.44	+	4.50	7.96E-02	6.36E-01
cellular response to lead ion (GO:0071284)	4	1	.06	+	15.75	7.57E-02	6.37E-01
regulation of ubiquitin protein ligase activity (GO:1904666)	28	2	.44	+	4.50	7.96E-02	6.37E-01
negative regulation of hematopoietic stem cell differentiation (GO:1902037)	4	1	.06	+	15.75	7.57E-02	6.37E-01
negative regulation of cell killing (GO:0031342)	28	2	.44	+	4.50	7.96E-02	6.37E-01
regulation of oxidative phosphorylation uncoupler activity (GO:2000275)	4	1	.06	+	15.75	7.57E-02	6.37E-01
aggrephagy (GO:0035973)	28	2	.44	+	4.50	7.96E-02	6.37E-01
regulation of postsynaptic membrane organization (GO:1901626)	4	1	.06	+	15.75	7.57E-02	6.38E-01
negative regulation of oxidoreductase activity (GO:0051354)	28	2	.44	+	4.50	7.96E-02	6.38E-01
negative regulation of mitochondrial membrane permeability involved in apoptotic process (GO:1902109)	4	1	.06	+	15.75	7.57E-02	6.38E-01
bone growth (GO:0098868)	28	2	.44	+	4.50	7.96E-02	6.38E-01
protein succinylation (GO:0018335)	4	1	.06	+	15.75	7.57E-02	6.38E-01
positive regulation of protein autophosphorylation (GO:0031954)	28	2	.44	+	4.50	7.96E-02	6.38E-01
negative regulation of hepatocyte proliferation (GO:2000346)	4	1	.06	+	15.75	7.57E-02	6.39E-01
phagosome acidification (GO:0090383)	28	2	.44	+	4.50	7.96E-02	6.39E-01
negative regulation of histone ubiquitination (GO:0033183)	4	1	.06	+	15.75	7.57E-02	6.39E-01
positive regulation of excitatory postsynaptic potential (GO:2000463)	28	2	.44	+	4.50	7.96E-02	6.39E-01
cellular response to redox state (GO:0071461)	4	1	.06	+	15.75	7.57E-02	6.39E-01
basement membrane organization (GO:0071711)	28	2	.44	+	4.50	7.96E-02	6.39E-01
negative regulation of lipid metabolic process (GO:0045833)	97	4	1.54	+	2.60	7.39E-02	6.39E-01
desmosome assembly (GO:0002159)	4	1	.06	+	15.75	7.57E-02	6.40E-01
neuronal action potential (GO:0019228)	28	2	.44	+	4.50	7.96E-02	6.40E-01
positive regulation of neuron death (GO:1901216)	97	4	1.54	+	2.60	7.39E-02	6.40E-01
aspartate catabolic process (GO:0006533)	4	1	.06	+	15.75	7.57E-02	6.40E-01
apoptotic process involved in development (GO:1902742)	28	2	.44	+	4.50	7.96E-02	6.40E-01
L-serine catabolic process (GO:0006565)	4	1	.06	+	15.75	7.57E-02	6.40E-01
polyol catabolic process (GO:0046174)	28	2	.44	+	4.50	7.96E-02	6.40E-01
modulation by host of viral RNA genome replication (GO:0044830)	4	1	.06	+	15.75	7.57E-02	6.41E-01
protein localization to plasma membrane raft (GO:0044860)	4	1	.06	+	15.75	7.57E-02	6.41E-01
metanephric renal vesicle formation (GO:0072093)	4	1	.06	+	15.75	7.57E-02	6.41E-01
farnesyl diphosphate biosynthetic process (GO:0045337)	4	1	.06	+	15.75	7.57E-02	6.42E-01
endothelial cell-cell adhesion (GO:0071603)	4	1	.06	+	15.75	7.57E-02	6.42E-01
T cell activation via T cell receptor contact with antigen bound to MHC molecule on antigen presenting cell (GO:0002291)	4	1	.06	+	15.75	7.57E-02	6.42E-01
phosphatidylserine biosynthetic process (GO:0006659)	4	1	.06	+	15.75	7.57E-02	6.43E-01
negative regulation of superoxide anion generation (GO:0032929)	4	1	.06	+	15.75	7.57E-02	6.43E-01
cell development (GO:0048468)	1646	35	26.13	+	1.34	8.06E-02	6.43E-01
urinary bladder development (GO:0060157)	4	1	.06	+	15.75	7.57E-02	6.43E-01
regulation of adenosine receptor signaling pathway (GO:0060167)	4	1	.06	+	15.75	7.57E-02	6.44E-01
cell part morphogenesis (GO:0032990)	526	14	8.35	+	1.68	7.45E-02	6.44E-01
cholesterol biosynthetic process via desmosterol (GO:0033489)	4	1	.06	+	15.75	7.57E-02	6.44E-01
cholesterol biosynthetic process via lathosterol (GO:0033490)	4	1	.06	+	15.75	7.57E-02	6.44E-01
DNA packaging (GO:0006323)	202	0	3.21	-	< 0.01	8.08E-02	6.45E-01
MHC class II protein complex assembly (GO:0002399)	4	1	.06	+	15.75	7.57E-02	6.45E-01
thiamine metabolic process (GO:0006772)	4	1	.06	+	15.75	7.57E-02	6.45E-01
negative regulation of cytokine production involved in immune response (GO:0002719)	27	2	.43	+	4.67	7.50E-02	6.45E-01
dendritic cell antigen processing and presentation (GO:0002468)	4	1	.06	+	15.75	7.57E-02	6.45E-01
deoxyribose phosphate catabolic process (GO:0046386)	27	2	.43	+	4.67	7.50E-02	6.46E-01
carnitine transmembrane transport (GO:1902603)	4	1	.06	+	15.75	7.57E-02	6.46E-01
regulation of dendrite extension (GO:1903859)	27	2	.43	+	4.67	7.50E-02	6.46E-01
negative regulation of adenylate cyclase-activating adrenergic receptor signaling pathway (GO:0071878)	4	1	.06	+	15.75	7.57E-02	6.46E-01
nucleobase-containing small molecule interconversion (GO:0015949)	27	2	.43	+	4.67	7.50E-02	6.46E-01
dGMP catabolic process (GO:0046055)	4	1	.06	+	15.75	7.57E-02	6.47E-01
sperm capacitation (GO:0048240)	27	2	.43	+	4.67	7.50E-02	6.47E-01
dAMP catabolic process (GO:0046059)	4	1	.06	+	15.75	7.57E-02	6.47E-01
positive regulation of granulocyte chemotaxis (GO:0071624)	27	2	.43	+	4.67	7.50E-02	6.47E-01
DNA damage checkpoint signaling (GO:0000077)	142	5	2.25	+	2.22	8.12E-02	6.47E-01
guanine metabolic process (GO:0046098)	4	1	.06	+	15.75	7.57E-02	6.47E-01
positive regulation of collagen biosynthetic process (GO:0032967)	27	2	.43	+	4.67	7.50E-02	6.48E-01
negative regulation of mammary gland epithelial cell proliferation (GO:0033600)	4	1	.06	+	15.75	7.57E-02	6.48E-01
regulation of epithelial cell proliferation (GO:0050678)	340	10	5.40	+	1.85	7.49E-02	6.48E-01
positive regulation of G protein-coupled receptor signaling pathway (GO:0045745)	27	2	.43	+	4.67	7.50E-02	6.48E-01
peptide antigen assembly with MHC class II protein complex (GO:0002503)	4	1	.06	+	15.75	7.57E-02	6.48E-01
adherens junction organization (GO:0034332)	62	3	.98	+	3.05	8.15E-02	6.48E-01
hypoxanthine metabolic process (GO:0046100)	4	1	.06	+	15.75	7.57E-02	6.48E-01
chemotaxis (GO:0006935)	547	14	8.69	+	1.61	8.16E-02	6.48E-01
positive regulation of macroautophagy (GO:0016239)	62	3	.98	+	3.05	8.15E-02	6.48E-01
purine deoxyribonucleoside catabolic process (GO:0046124)	4	1	.06	+	15.75	7.57E-02	6.49E-01
selective autophagy (GO:0061912)	62	3	.98	+	3.05	8.15E-02	6.49E-01
regulation of sterol import (GO:2000909)	4	1	.06	+	15.75	7.57E-02	6.49E-01
negative regulation of synaptic transmission (GO:0050805)	62	3	.98	+	3.05	8.15E-02	6.49E-01
ventral midline development (GO:0007418)	4	1	.06	+	15.75	7.57E-02	6.49E-01
endocytic recycling (GO:0032456)	62	3	.98	+	3.05	8.15E-02	6.49E-01
endomembrane system organization (GO:0010256)	530	14	8.42	+	1.66	7.55E-02	6.50E-01
lobar bronchus epithelium development (GO:0060481)	4	1	.06	+	15.75	7.57E-02	6.50E-01
organelle assembly (GO:0070925)	796	19	12.64	+	1.50	8.18E-02	6.50E-01
mesenchymal stem cell differentiation (GO:0072497)	4	1	.06	+	15.75	7.57E-02	6.50E-01
beta-alanine metabolic process (GO:0019482)	4	1	.06	+	15.75	7.57E-02	6.50E-01
negative regulation of dendritic cell antigen processing and presentation (GO:0002605)	4	1	.06	+	15.75	7.57E-02	6.51E-01
negative regulation of transport (GO:0051051)	430	12	6.83	+	1.76	7.57E-02	6.51E-01
reactive oxygen species metabolic process (GO:0072593)	101	4	1.60	+	2.49	8.26E-02	6.55E-01
negative regulation of small molecule metabolic process (GO:0062014)	101	4	1.60	+	2.49	8.26E-02	6.55E-01
negative regulation of inflammatory response to antigenic stimulus (GO:0002862)	208	0	3.30	-	< 0.01	8.27E-02	6.56E-01
taxis (GO:0042330)	550	14	8.73	+	1.60	8.29E-02	6.57E-01
neutral lipid biosynthetic process (GO:0046460)	29	2	.46	+	4.34	8.42E-02	6.63E-01
acylglycerol biosynthetic process (GO:0046463)	29	2	.46	+	4.34	8.42E-02	6.64E-01
positive regulation of lamellipodium assembly (GO:0010592)	29	2	.46	+	4.34	8.42E-02	6.64E-01
multi-organism transport (GO:0044766)	63	3	1.00	+	3.00	8.44E-02	6.64E-01
hair follicle morphogenesis (GO:0031069)	29	2	.46	+	4.34	8.42E-02	6.64E-01
[truncated: 13,808 more rows]

## Sheet: GO Molecular function
GO molecular function complete	Homo sapiens - REFLIST (20595)	upload_1 (327)	upload_1 (expected)	upload_1 (over/under)	upload_1 (fold Enrichment)	upload_1 (raw P-value)	upload_1 (FDR)
binding (GO:0005488)	16501	314	262.00	+	1.20	7.43E-17	1.81E-13	FDR < 0.05
protein binding (GO:0005515)	14333	292	227.57	+	1.28	5.66E-17	2.75E-13
identical protein binding (GO:0042802)	2107	83	33.45	+	2.48	1.58E-14	2.56E-11
Unclassified (UNCLASSIFIED)	2353	3	37.36	-	.08	1.74E-13	1.41E-10
catalytic activity (GO:0003824)	5637	153	89.50	+	1.71	1.32E-13	1.60E-10
molecular_function (GO:0003674)	18242	324	289.64	+	1.12	1.74E-13	1.70E-10
small molecule binding (GO:0036094)	2507	87	39.81	+	2.19	2.19E-12	1.52E-09
structural molecule activity (GO:0005198)	707	40	11.23	+	3.56	1.13E-11	6.86E-09
anion binding (GO:0043168)	2408	79	38.23	+	2.07	4.61E-10	2.49E-07
ion binding (GO:0043167)	6067	149	96.33	+	1.55	1.10E-09	5.36E-07
protein-containing complex binding (GO:0044877)	1303	52	20.69	+	2.51	1.87E-09	8.27E-07
nucleoside phosphate binding (GO:1901265)	2171	71	34.47	+	2.06	6.71E-09	2.51E-06
nucleotide binding (GO:0000166)	2170	71	34.45	+	2.06	6.66E-09	2.70E-06
enzyme binding (GO:0019899)	2050	67	32.55	+	2.06	1.67E-08	5.80E-06
protein homodimerization activity (GO:0042803)	692	33	10.99	+	3.00	4.34E-08	1.41E-05
hydrolase activity (GO:0016787)	2379	73	37.77	+	1.93	4.74E-08	1.44E-05
carbohydrate derivative binding (GO:0097367)	2272	70	36.07	+	1.94	7.51E-08	2.15E-05
protein dimerization activity (GO:0046983)	1040	41	16.51	+	2.48	1.71E-07	4.61E-05
DNA-binding transcription factor activity (GO:0003700)	1446	3	22.96	-	.13	2.54E-07	6.49E-05
oxidoreductase activity, acting on the CH-OH group of donors, NAD or NADP as acceptor (GO:0016616)	126	13	2.00	+	6.50	2.92E-07	6.75E-05
purine nucleotide binding (GO:0017076)	1925	61	30.56	+	2.00	2.89E-07	7.02E-05
purine ribonucleotide binding (GO:0032555)	1910	60	30.33	+	1.98	4.59E-07	1.01E-04
DNA-binding transcription factor activity, RNA polymerase II-specific (GO:0000981)	1394	3	22.13	-	.14	5.43E-07	1.15E-04
GDP binding (GO:0019003)	75	10	1.19	+	8.40	8.41E-07	1.51E-04
ribonucleotide binding (GO:0032553)	1927	60	30.60	+	1.96	8.16E-07	1.53E-04
oxidoreductase activity, acting on CH-OH group of donors (GO:0016614)	138	13	2.19	+	5.93	7.58E-07	1.54E-04
oxidoreductase activity (GO:0016491)	752	32	11.94	+	2.68	7.94E-07	1.54E-04
cell adhesion molecule binding (GO:0050839)	537	26	8.53	+	3.05	9.59E-07	1.66E-04
lyase activity (GO:0016829)	199	15	3.16	+	4.75	1.50E-06	2.51E-04
structural constituent of cytoskeleton (GO:0005200)	104	11	1.65	+	6.66	1.93E-06	3.02E-04
exopeptidase activity (GO:0008238)	104	11	1.65	+	6.66	1.93E-06	3.12E-04
cadherin binding (GO:0045296)	323	19	5.13	+	3.70	2.08E-06	3.16E-04
transcription regulator activity (GO:0140110)	1943	9	30.85	-	.29	3.32E-06	4.89E-04
purine ribonucleoside triphosphate binding (GO:0035639)	1839	56	29.20	+	1.92	3.55E-06	5.08E-04
sequence-specific DNA binding (GO:0043565)	1696	7	26.93	-	.26	5.57E-06	7.74E-04
DNA binding (GO:0003677)	2488	15	39.50	-	.38	6.34E-06	8.56E-04
pyridoxal phosphate binding (GO:0030170)	56	8	.89	+	9.00	6.76E-06	8.88E-04
sequence-specific double-stranded DNA binding (GO:1990837)	1591	6	25.26	-	.24	7.28E-06	9.32E-04
vitamin B6 binding (GO:0070279)	57	8	.91	+	8.84	7.61E-06	9.48E-04
vitamin binding (GO:0019842)	148	12	2.35	+	5.11	8.48E-06	1.03E-03
RNA polymerase II transcription regulatory region sequence-specific DNA binding (GO:0000977)	1430	5	22.71	-	.22	1.22E-05	1.45E-03
transcription regulatory region nucleic acid binding (GO:0001067)	1530	6	24.29	-	.25	1.41E-05	1.60E-03
calcium ion binding (GO:0005509)	730	29	11.59	+	2.50	1.46E-05	1.62E-03
transcription cis-regulatory region binding (GO:0000976)	1528	6	24.26	-	.25	1.41E-05	1.63E-03
actin binding (GO:0003779)	453	21	7.19	+	2.92	2.02E-05	2.13E-03
G protein-coupled receptor activity (GO:0004930)	882	1	14.00	-	.07	2.00E-05	2.16E-03
double-stranded DNA binding (GO:0003690)	1686	8	26.77	-	.30	2.31E-05	2.39E-03
collagen binding (GO:0005518)	70	8	1.11	+	7.20	2.96E-05	3.00E-03
guanyl ribonucleotide binding (GO:0032561)	402	19	6.38	+	2.98	3.91E-05	3.80E-03
cis-regulatory region sequence-specific DNA binding (GO:0000987)	1224	4	19.43	-	.21	4.11E-05	3.84E-03
carbon-carbon lyase activity (GO:0016830)	53	7	.84	+	8.32	4.06E-05	3.87E-03
guanyl nucleotide binding (GO:0019001)	402	19	6.38	+	2.98	3.91E-05	3.88E-03
RNA polymerase II cis-regulatory region sequence-specific DNA binding (GO:0000978)	1204	4	19.12	-	.21	5.94E-05	5.45E-03
GTP binding (GO:0005525)	381	18	6.05	+	2.98	6.27E-05	5.64E-03
aldehyde-lyase activity (GO:0016832)	12	4	.19	+	20.99	9.19E-05	8.13E-03
structural constituent of ribosome (GO:0003735)	167	11	2.65	+	4.15	1.18E-04	1.02E-02
carboxypeptidase activity (GO:0004180)	44	6	.70	+	8.59	1.24E-04	1.06E-02
antioxidant activity (GO:0016209)	89	8	1.41	+	5.66	1.41E-04	1.18E-02
laminin binding (GO:0043236)	29	5	.46	+	10.86	1.73E-04	1.43E-02
carbohydrate binding (GO:0030246)	275	14	4.37	+	3.21	1.97E-04	1.60E-02
organic cyclic compound binding (GO:0097159)	6017	127	95.54	+	1.33	2.30E-04	1.83E-02
monosaccharide binding (GO:0048029)	72	7	1.14	+	6.12	2.36E-04	1.85E-02
cytoskeletal protein binding (GO:0008092)	1003	32	15.93	+	2.01	2.51E-04	1.93E-02
metalloexopeptidase activity (GO:0008235)	73	7	1.16	+	6.04	2.56E-04	1.94E-02
actin filament binding (GO:0051015)	216	12	3.43	+	3.50	2.64E-04	1.97E-02
heterocyclic compound binding (GO:1901363)	5937	125	94.27	+	1.33	2.80E-04	2.07E-02
amide binding (GO:0033218)	395	17	6.27	+	2.71	2.87E-04	2.08E-02
aminoacylase activity (GO:0004046)	6	3	.10	+	31.49	2.96E-04	2.09E-02
arylesterase activity (GO:0004064)	6	3	.10	+	31.49	2.96E-04	2.12E-02
protein domain specific binding (GO:0019904)	700	25	11.11	+	2.25	3.16E-04	2.19E-02
extracellular matrix binding (GO:0050840)	57	6	.91	+	6.63	4.47E-04	3.06E-02
proteoglycan binding (GO:0043394)	37	5	.59	+	8.51	4.79E-04	3.19E-02
sulfur compound binding (GO:1901681)	266	13	4.22	+	3.08	4.79E-04	3.23E-02
adenyl nucleotide binding (GO:0030554)	1570	43	24.93	+	1.72	5.23E-04	3.44E-02
cation binding (GO:0043169)	4364	96	69.29	+	1.39	6.34E-04	4.11E-02
peptidase activity (GO:0008233)	661	23	10.50	+	2.19	7.22E-04	4.62E-02
hydro-lyase activity (GO:0016836)	64	6	1.02	+	5.90	7.88E-04	4.98E-02
protein-membrane adaptor activity (GO:0043495)	24	4	.38	+	10.50	8.92E-04	5.56E-02
adenyl ribonucleotide binding (GO:0032559)	1557	42	24.72	+	1.70	1.02E-03	6.28E-02
rRNA binding (GO:0019843)	68	6	1.08	+	5.56	1.06E-03	6.42E-02
GTPase activity (GO:0003924)	329	14	5.22	+	2.68	1.08E-03	6.46E-02
signaling receptor binding (GO:0005102)	1583	42	25.13	+	1.67	1.17E-03	6.96E-02
GTPase binding (GO:0051020)	295	13	4.68	+	2.78	1.19E-03	6.97E-02
metal ion binding (GO:0046872)	4275	93	67.88	+	1.37	1.22E-03	7.04E-02
fructose 1,6-bisphosphate 1-phosphatase activity (GO:0042132)	2	2	.03	+	62.98	1.43E-03	7.91E-02
nucleoside-triphosphatase activity (GO:0017111)	487	18	7.73	+	2.33	1.39E-03	7.93E-02
aryldialkylphosphatase activity (GO:0004063)	2	2	.03	+	62.98	1.43E-03	8.00E-02
dihydrolipoyl dehydrogenase activity (GO:0004148)	2	2	.03	+	62.98	1.43E-03	8.09E-02
olfactory receptor activity (GO:0004984)	441	0	7.00	-	< 0.01	1.51E-03	8.27E-02
RNA binding (GO:0003723)	1686	44	26.77	+	1.64	1.55E-03	8.38E-02
pyrophosphatase activity (GO:0016462)	545	19	8.65	+	2.20	1.63E-03	8.71E-02
lipoprotein particle binding (GO:0071813)	29	4	.46	+	8.69	1.68E-03	8.76E-02
protein-lipid complex binding (GO:0071814)	29	4	.46	+	8.69	1.68E-03	8.86E-02
kinase binding (GO:0019900)	765	24	12.15	+	1.98	1.84E-03	9.54E-02
ligase activity (GO:0016874)	170	9	2.70	+	3.33	2.08E-03	1.06E-01
AMP binding (GO:0016208)	14	3	.22	+	13.50	2.19E-03	1.10E-01
oxidoreductase activity, acting on a sulfur group of donors, NAD(P) as acceptor (GO:0016668)	14	3	.22	+	13.50	2.19E-03	1.11E-01
lactonohydrolase activity (GO:0046573)	3	2	.05	+	41.99	2.36E-03	1.11E-01
acyl-L-homoserine-lactone lactonohydrolase activity (GO:0102007)	3	2	.05	+	41.99	2.36E-03	1.13E-01
peroxidase activity (GO:0004601)	54	5	.86	+	5.83	2.27E-03	1.13E-01
carbon-oxygen lyase activity (GO:0016835)	80	6	1.27	+	4.72	2.30E-03	1.13E-01
protein tyrosine kinase collagen receptor activity (GO:0038062)	3	2	.05	+	41.99	2.36E-03	1.14E-01
fructose-bisphosphate aldolase activity (GO:0004332)	3	2	.05	+	41.99	2.36E-03	1.15E-01
carboxylic acid binding (GO:0031406)	176	9	2.79	+	3.22	2.60E-03	1.20E-01
intermediate filament binding (GO:0019215)	15	3	.24	+	12.60	2.59E-03	1.21E-01
protein kinase binding (GO:0019901)	684	22	10.86	+	2.03	2.75E-03	1.25E-01
amyloid-beta binding (GO:0001540)	83	6	1.32	+	4.55	2.73E-03	1.25E-01
hydrolase activity, acting on acid anhydrides (GO:0016817)	557	19	8.84	+	2.15	2.96E-03	1.32E-01
hydrolase activity, acting on acid anhydrides, in phosphorus-containing anhydrides (GO:0016818)	556	19	8.83	+	2.15	2.94E-03	1.32E-01
oxidoreductase activity, acting on peroxide as acceptor (GO:0016684)	58	5	.92	+	5.43	3.03E-03	1.34E-01
integrin binding (GO:0005178)	147	8	2.33	+	3.43	3.09E-03	1.35E-01
cell adhesion mediator activity (GO:0098631)	59	5	.94	+	5.34	3.25E-03	1.41E-01
ATP-dependent microtubule motor activity, minus-end-directed (GO:0008569)	18	3	.29	+	10.50	4.08E-03	1.68E-01
enzyme inhibitor activity (GO:0004857)	405	15	6.43	+	2.33	3.93E-03	1.69E-01
calcium-dependent protein binding (GO:0048306)	90	6	1.43	+	4.20	3.98E-03	1.70E-01
lipase inhibitor activity (GO:0055102)	18	3	.29	+	10.50	4.08E-03	1.70E-01
heparan sulfate proteoglycan binding (GO:0043395)	18	3	.29	+	10.50	4.08E-03	1.71E-01
small GTPase binding (GO:0031267)	263	11	4.18	+	2.63	4.06E-03	1.72E-01
aminopeptidase activity (GO:0004177)	40	4	.64	+	6.30	4.86E-03	1.89E-01
thioredoxin peroxidase activity (GO:0008379)	5	2	.08	+	25.19	4.86E-03	1.90E-01
serine-type carboxypeptidase activity (GO:0004185)	5	2	.08	+	25.19	4.86E-03	1.92E-01
acyltransferase, acyl groups converted into alkyl on transfer (GO:0046912)	5	2	.08	+	25.19	4.86E-03	1.94E-01
ATP binding (GO:0005524)	1493	38	23.71	+	1.60	5.03E-03	1.94E-01
acetyl-CoA C-acetyltransferase activity (GO:0003985)	5	2	.08	+	25.19	4.86E-03	1.95E-01
complement component C3b binding (GO:0001851)	5	2	.08	+	25.19	4.86E-03	1.97E-01
lipid transporter activity (GO:0005319)	159	8	2.52	+	3.17	4.85E-03	1.98E-01
metallopeptidase activity (GO:0008237)	197	9	3.13	+	2.88	5.26E-03	2.01E-01
ankyrin binding (GO:0030506)	20	3	.32	+	9.45	5.31E-03	2.02E-01
peptide binding (GO:0042277)	318	12	5.05	+	2.38	6.01E-03	2.25E-01
complement binding (GO:0001848)	21	3	.33	+	9.00	6.00E-03	2.26E-01
collagen receptor activity (GO:0038064)	6	2	.10	+	20.99	6.41E-03	2.31E-01
lactate dehydrogenase activity (GO:0004457)	6	2	.10	+	20.99	6.41E-03	2.32E-01
C-acetyltransferase activity (GO:0016453)	6	2	.10	+	20.99	6.41E-03	2.34E-01
phosphatidylcholine-sterol O-acyltransferase activator activity (GO:0060228)	6	2	.10	+	20.99	6.41E-03	2.36E-01
fructose binding (GO:0070061)	6	2	.10	+	20.99	6.41E-03	2.38E-01
transaminase activity (GO:0008483)	22	3	.35	+	8.59	6.74E-03	2.41E-01
protease binding (GO:0002020)	135	7	2.14	+	3.27	7.06E-03	2.51E-01
transferase activity, transferring nitrogenous groups (GO:0016769)	23	3	.37	+	8.21	7.54E-03	2.64E-01
glutathione peroxidase activity (GO:0004602)	23	3	.37	+	8.21	7.54E-03	2.66E-01
cytochrome-b5 reductase activity, acting on NAD(P)H (GO:0004128)	7	2	.11	+	17.99	8.15E-03	2.81E-01
acetyl-CoA C-acyltransferase activity (GO:0003988)	7	2	.11	+	17.99	8.15E-03	2.83E-01
virus receptor activity (GO:0001618)	76	5	1.21	+	4.14	8.81E-03	3.02E-01
exogenous protein binding (GO:0140272)	77	5	1.22	+	4.09	9.26E-03	3.15E-01
cell-cell adhesion mediator activity (GO:0098632)	49	4	.78	+	5.14	9.40E-03	3.17E-01
magnesium ion binding (GO:0000287)	218	9	3.46	+	2.60	9.68E-03	3.24E-01
hydroxymethyl-, formyl- and related transferase activity (GO:0016742)	8	2	.13	+	15.75	1.01E-02	3.29E-01
chromatin binding (GO:0003682)	579	2	9.19	-	.22	9.94E-03	3.31E-01
selenium binding (GO:0008430)	8	2	.13	+	15.75	1.01E-02	3.31E-01
mRNA 5'-UTR binding (GO:0048027)	26	3	.41	+	7.27	1.02E-02	3.32E-01
peroxiredoxin activity (GO:0051920)	8	2	.13	+	15.75	1.01E-02	3.34E-01
protein N-terminus binding (GO:0047485)	112	6	1.78	+	3.37	1.06E-02	3.43E-01
spectrin binding (GO:0030507)	27	3	.43	+	7.00	1.12E-02	3.57E-01
cholesterol binding (GO:0015485)	52	4	.83	+	4.84	1.14E-02	3.59E-01
metalloaminopeptidase activity (GO:0070006)	27	3	.43	+	7.00	1.12E-02	3.60E-01
G protein-coupled serotonin receptor binding (GO:0031821)	9	2	.14	+	14.00	1.22E-02	3.76E-01
CD4 receptor binding (GO:0042609)	9	2	.14	+	14.00	1.22E-02	3.78E-01
NADP binding (GO:0050661)	53	4	.84	+	4.75	1.21E-02	3.79E-01
mannosyl-oligosaccharide mannosidase activity (GO:0015924)	9	2	.14	+	14.00	1.22E-02	3.80E-01
amino acid binding (GO:0016597)	54	4	.86	+	4.67	1.28E-02	3.92E-01
peptidase regulator activity (GO:0061134)	232	9	3.68	+	2.44	1.39E-02	4.22E-01
dipeptidyl-peptidase activity (GO:0008239)	10	2	.16	+	12.60	1.45E-02	4.25E-01
MHC class II receptor activity (GO:0032395)	10	2	.16	+	12.60	1.45E-02	4.27E-01
PDZ domain binding (GO:0030165)	87	5	1.38	+	3.62	1.47E-02	4.29E-01
sugar-phosphatase activity (GO:0050308)	10	2	.16	+	12.60	1.45E-02	4.30E-01
serine-type exopeptidase activity (GO:0070008)	10	2	.16	+	12.60	1.45E-02	4.32E-01
cysteine-type endopeptidase inhibitor activity (GO:0004869)	56	4	.89	+	4.50	1.44E-02	4.34E-01
oxidoreductase activity, acting on NAD(P)H, heme protein as acceptor (GO:0016653)	10	2	.16	+	12.60	1.45E-02	4.35E-01
NAD binding (GO:0051287)	57	4	.91	+	4.42	1.52E-02	4.38E-01
oxidoreductase activity, acting on a sulfur group of donors (GO:0016667)	57	4	.91	+	4.42	1.52E-02	4.40E-01
phospholipid scramblase activity (GO:0017128)	11	2	.17	+	11.45	1.70E-02	4.68E-01
tumor necrosis factor receptor binding (GO:0005164)	32	3	.51	+	5.90	1.71E-02	4.70E-01
thioesterase binding (GO:0031996)	11	2	.17	+	11.45	1.70E-02	4.71E-01
T cell receptor binding (GO:0042608)	11	2	.17	+	11.45	1.70E-02	4.74E-01
arachidonate-CoA ligase activity (GO:0047676)	11	2	.17	+	11.45	1.70E-02	4.76E-01
alcohol binding (GO:0043178)	90	5	1.43	+	3.50	1.67E-02	4.78E-01
nuclear export signal receptor activity (GO:0005049)	11	2	.17	+	11.45	1.70E-02	4.79E-01
carbohydrate phosphatase activity (GO:0019203)	11	2	.17	+	11.45	1.70E-02	4.82E-01
alditol:NADP+ 1-oxidoreductase activity (GO:0004032)	12	2	.19	+	10.50	1.96E-02	5.26E-01
sterol binding (GO:0032934)	62	4	.98	+	4.06	1.98E-02	5.28E-01
oligopeptide binding (GO:1900750)	12	2	.19	+	10.50	1.96E-02	5.29E-01
potassium ion binding (GO:0030955)	12	2	.19	+	10.50	1.96E-02	5.32E-01
GDP-L-fucose synthase activity (GO:0050577)	1	1	.02	+	62.98	3.10E-02	5.33E-01
hydrolase activity, acting on carbon-nitrogen (but not peptide) bonds (GO:0016810)	129	6	2.05	+	2.93	1.95E-02	5.33E-01
L-cysteine:2-oxoglutarate aminotransferase activity (GO:0047801)	1	1	.02	+	62.98	3.10E-02	5.35E-01
ligase activity, forming carbon-sulfur bonds (GO:0016877)	41	3	.65	+	4.61	3.13E-02	5.35E-01
oxidoreductase activity, acting on CH or CH2 groups, NAD or NADP as acceptor (GO:0016726)	1	1	.02	+	62.98	3.10E-02	5.37E-01
oxidoreductase activity, acting on CH or CH2 groups, oxygen as acceptor (GO:0016727)	1	1	.02	+	62.98	3.10E-02	5.39E-01
aldehyde dehydrogenase [NAD(P)+] activity (GO:0004030)	16	2	.25	+	7.87	3.16E-02	5.39E-01
transporter activity (GO:0005215)	1202	29	19.08	+	1.52	3.18E-02	5.40E-01
citrate secondary active transmembrane transporter activity (GO:0071913)	1	1	.02	+	62.98	3.10E-02	5.40E-01
pyridoxal binding (GO:0070280)	1	1	.02	+	62.98	3.10E-02	5.42E-01
L-methionine:thioredoxin-disulfide S-oxidoreductase activity (GO:0033744)	1	1	.02	+	62.98	3.10E-02	5.44E-01
alanylglutamate dipeptidase activity (GO:0103046)	1	1	.02	+	62.98	3.10E-02	5.46E-01
lipoamide binding (GO:0043544)	1	1	.02	+	62.98	3.10E-02	5.48E-01
GDP-mannose 3,5-epimerase activity (GO:0047918)	1	1	.02	+	62.98	3.10E-02	5.50E-01
L-glucuronate reductase activity (GO:0047939)	1	1	.02	+	62.98	3.10E-02	5.52E-01
glucuronolactone reductase activity (GO:0047941)	1	1	.02	+	62.98	3.10E-02	5.54E-01
xanthine dehydrogenase activity (GO:0004854)	1	1	.02	+	62.98	3.10E-02	5.56E-01
heparin binding (GO:0008201)	169	7	2.68	+	2.61	2.10E-02	5.57E-01
xanthine oxidase activity (GO:0004855)	1	1	.02	+	62.98	3.10E-02	5.59E-01
citrate synthase activity (GO:0036440)	1	1	.02	+	62.98	3.10E-02	5.61E-01
thiolester hydrolase activity (GO:0016790)	42	3	.67	+	4.50	3.31E-02	5.61E-01
oxidoreductase activity, acting on the CH-OH group of donors, cytochrome as acceptor (GO:0016898)	1	1	.02	+	62.98	3.10E-02	5.63E-01
carboxy-lyase activity (GO:0016831)	35	3	.56	+	5.40	2.13E-02	5.63E-01
L-methionine-(S)-S-oxide reductase activity (GO:0036456)	1	1	.02	+	62.98	3.10E-02	5.65E-01
5-hydroxy-L-tryptophan decarboxylase activity (GO:0036467)	1	1	.02	+	62.98	3.10E-02	5.67E-01
L-dopa decarboxylase activity (GO:0036468)	1	1	.02	+	62.98	3.10E-02	5.69E-01
nitric-oxide synthase inhibitor activity (GO:0036487)	1	1	.02	+	62.98	3.10E-02	5.71E-01
tricarboxylate secondary active transmembrane transporter activity (GO:0005371)	1	1	.02	+	62.98	3.10E-02	5.73E-01
peroxynitrite reductase activity (GO:0072541)	1	1	.02	+	62.98	3.10E-02	5.76E-01
L-xylulose reductase (NAD+) activity (GO:0044105)	1	1	.02	+	62.98	3.10E-02	5.78E-01
sterol delta7 reductase activity (GO:0009918)	1	1	.02	+	62.98	3.10E-02	5.80E-01
(R,R)-butanediol dehydrogenase activity (GO:0000721)	1	1	.02	+	62.98	3.10E-02	5.82E-01
phospholipase inhibitor activity (GO:0004859)	13	2	.21	+	9.69	2.24E-02	5.84E-01
Ac-Asp-Glu binding (GO:1904492)	1	1	.02	+	62.98	3.10E-02	5.84E-01
alkali metal ion binding (GO:0031420)	17	2	.27	+	7.41	3.50E-02	5.86E-01
tetrahydrofolyl-poly(glutamate) polymer binding (GO:1904493)	1	1	.02	+	62.98	3.10E-02	5.87E-01
adenylate cyclase binding (GO:0008179)	13	2	.21	+	9.69	2.24E-02	5.88E-01
proton-transporting ATP synthase activity, rotational mechanism (GO:0046933)	17	2	.27	+	7.41	3.50E-02	5.88E-01
peptidase inhibitor activity (GO:0030414)	189	7	3.00	+	2.33	3.48E-02	5.88E-01
thiamine phosphate phosphatase activity (GO:0042131)	1	1	.02	+	62.98	3.10E-02	5.89E-01
D-xylulose reductase activity (GO:0046526)	1	1	.02	+	62.98	3.10E-02	5.91E-01
transition metal ion binding (GO:0046914)	1114	27	17.69	+	1.53	3.55E-02	5.93E-01
hypoxanthine dehydrogenase activity (GO:0070674)	1	1	.02	+	62.98	3.10E-02	5.94E-01
FAD binding (GO:0071949)	36	3	.57	+	5.25	2.28E-02	5.94E-01
hypoxanthine oxidase activity (GO:0070675)	1	1	.02	+	62.98	3.10E-02	5.96E-01
histone binding (GO:0042393)	243	0	3.86	-	< 0.01	3.59E-02	5.97E-01
enoyl-[acyl-carrier-protein] reductase (NADPH, A-specific) activity (GO:0047117)	1	1	.02	+	62.98	3.10E-02	5.98E-01
lithium ion binding (GO:0031403)	2	1	.03	+	31.49	4.62E-02	6.00E-01
carboxylic ester hydrolase activity (GO:0052689)	150	6	2.38	+	2.52	3.62E-02	6.00E-01
aromatic-L-amino-acid decarboxylase activity (GO:0004058)	1	1	.02	+	62.98	3.10E-02	6.01E-01
pyruvate kinase activity (GO:0004743)	2	1	.03	+	31.49	4.62E-02	6.02E-01
GDP-mannose 4,6-dehydratase activity (GO:0008446)	1	1	.02	+	62.98	3.10E-02	6.03E-01
oxidoreductase activity, acting on paired donors, with incorporation or reduction of molecular oxygen, another compound as one donor, and incorporation of one atom of oxygen (GO:0016716)	2	1	.03	+	31.49	4.62E-02	6.03E-01
extracellular matrix structural constituent (GO:0005201)	173	7	2.75	+	2.55	2.34E-02	6.04E-01
sterol O-acyltransferase activity (GO:0004772)	2	1	.03	+	31.49	4.62E-02	6.05E-01
pyridoxal kinase activity (GO:0008478)	1	1	.02	+	62.98	3.10E-02	6.06E-01
threonine aldolase activity (GO:0004793)	2	1	.03	+	31.49	4.62E-02	6.07E-01
gamma-glutamyl-peptidase activity (GO:0034722)	1	1	.02	+	62.98	3.10E-02	6.08E-01
pristanate-CoA ligase activity (GO:0070251)	2	1	.03	+	31.49	4.62E-02	6.08E-01
aspartate-tRNA ligase activity (GO:0004815)	2	1	.03	+	31.49	4.62E-02	6.10E-01
GDP-4-dehydro-D-rhamnose reductase activity (GO:0042356)	1	1	.02	+	62.98	3.10E-02	6.11E-01
serine-tRNA ligase activity (GO:0004828)	2	1	.03	+	31.49	4.62E-02	6.12E-01
oxidoreductase activity, acting on the aldehyde or oxo group of donors (GO:0016903)	44	3	.70	+	4.29	3.70E-02	6.12E-01
protein serine kinase activity (using GTP as donor) (GO:0106264)	1	1	.02	+	62.98	3.10E-02	6.13E-01
glycerol-3-phosphate dehydrogenase [NAD(P)+] activity (GO:0047952)	2	1	.03	+	31.49	4.62E-02	6.13E-01
glycerol dehydrogenase [NADP+] activity (GO:0047956)	2	1	.03	+	31.49	4.62E-02	6.15E-01
citrate (Si)-synthase activity (GO:0004108)	1	1	.02	+	62.98	3.10E-02	6.15E-01
low-affinity glucose:sodium symporter activity (GO:0005362)	2	1	.03	+	31.49	4.62E-02	6.17E-01
deoxyribose-phosphate aldolase activity (GO:0004139)	1	1	.02	+	62.98	3.10E-02	6.18E-01
oxidoreductase activity, acting on the CH-OH group of donors, quinone or similar compound as acceptor (GO:0016901)	2	1	.03	+	31.49	4.62E-02	6.18E-01
adenine transmembrane transporter activity (GO:0015207)	2	1	.03	+	31.49	4.62E-02	6.20E-01
delta3,5-delta2,4-dienoyl-CoA isomerase activity (GO:0051750)	1	1	.02	+	62.98	3.10E-02	6.21E-01
peptide-methionine (S)-S-oxide reductase activity (GO:0008113)	2	1	.03	+	31.49	4.62E-02	6.22E-01
L-xylulose reductase (NADP+) activity (GO:0050038)	1	1	.02	+	62.98	3.10E-02	6.23E-01
MHC class Ib protein binding, via antigen binding groove (GO:0023030)	2	1	.03	+	31.49	4.62E-02	6.23E-01
D-threo-aldose 1-dehydrogenase activity (GO:0047834)	18	2	.29	+	7.00	3.84E-02	6.25E-01
phospholipid-hydroperoxide glutathione peroxidase activity (GO:0047066)	2	1	.03	+	31.49	4.62E-02	6.25E-01
S-(hydroxymethyl)glutathione dehydrogenase NADP activity (GO:0106321)	1	1	.02	+	62.98	3.10E-02	6.26E-01
purine phosphoribosyltransferase activity (GO:0106130)	2	1	.03	+	31.49	4.62E-02	6.27E-01
intracellular calcium activated chloride channel activity (GO:0005229)	18	2	.29	+	7.00	3.84E-02	6.27E-01
oxidoreductase activity, acting on the aldehyde or oxo group of donors, NAD or NADP as acceptor (GO:0016620)	37	3	.59	+	5.11	2.44E-02	6.28E-01
S-(hydroxymethyl)glutathione dehydrogenase NAD activity (GO:0106322)	1	1	.02	+	62.98	3.10E-02	6.28E-01
protein-glycine ligase activity, initiating (GO:0070736)	2	1	.03	+	31.49	4.62E-02	6.29E-01
RNA helicase activity (GO:0003724)	77	4	1.22	+	3.27	3.82E-02	6.29E-01
cadherin binding involved in cell-cell adhesion (GO:0098641)	18	2	.29	+	7.00	3.84E-02	6.29E-01
L-alanine:2-oxoglutarate aminotransferase activity (GO:0004021)	2	1	.03	+	31.49	4.62E-02	6.30E-01
adenine binding (GO:0002055)	1	1	.02	+	62.98	3.10E-02	6.31E-01
intracellular chloride channel activity (GO:0061778)	18	2	.29	+	7.00	3.84E-02	6.31E-01
3'(2'),5'-bisphosphate nucleotidase activity (GO:0008441)	2	1	.03	+	31.49	4.62E-02	6.32E-01
endopeptidase regulator activity (GO:0061135)	194	7	3.08	+	2.27	3.91E-02	6.33E-01
proteasome core complex binding (GO:1904854)	1	1	.02	+	62.98	3.10E-02	6.34E-01
iron-responsive element binding (GO:0030350)	2	1	.03	+	31.49	4.62E-02	6.34E-01
cholesterol O-acyltransferase activity (GO:0034736)	2	1	.03	+	31.49	4.62E-02	6.36E-01
formaldehyde dehydrogenase activity (GO:0018467)	1	1	.02	+	62.98	3.10E-02	6.36E-01
sour taste receptor activity (GO:0033040)	2	1	.03	+	31.49	4.62E-02	6.38E-01
metal chelating activity (GO:0046911)	1	1	.02	+	62.98	3.10E-02	6.39E-01
dimethylallyltranstransferase activity (GO:0004161)	2	1	.03	+	31.49	4.62E-02	6.39E-01
double-stranded RNA binding (GO:0003725)	78	4	1.24	+	3.23	3.96E-02	6.40E-01
myristoyl-CoA hydrolase activity (GO:0102991)	14	2	.22	+	9.00	2.53E-02	6.40E-01
formyltetrahydrofolate dehydrogenase activity (GO:0016155)	2	1	.03	+	31.49	4.62E-02	6.41E-01
beta-ureidopropionase activity (GO:0003837)	1	1	.02	+	62.98	3.10E-02	6.42E-01
protein tyrosine kinase binding (GO:1990782)	101	5	1.60	+	3.12	2.55E-02	6.42E-01
(3R)-hydroxymyristoyl-[acyl-carrier-protein] dehydratase activity (GO:0008659)	2	1	.03	+	31.49	4.62E-02	6.43E-01
alpha-mannosidase activity (GO:0004559)	14	2	.22	+	9.00	2.53E-02	6.44E-01
ATP citrate synthase activity (GO:0003878)	1	1	.02	+	62.98	3.10E-02	6.44E-01
3-hydroxydecanoyl-[acyl-carrier-protein] dehydratase activity (GO:0008693)	2	1	.03	+	31.49	4.62E-02	6.45E-01
tumor necrosis factor receptor superfamily binding (GO:0032813)	50	3	.79	+	3.78	5.00E-02	6.46E-01
myristoyl-[acyl-carrier-protein] hydrolase activity (GO:0016295)	2	1	.03	+	31.49	4.62E-02	6.47E-01
ATPase (GO:0016887)	516	14	8.19	+	1.71	4.99E-02	6.47E-01
[acyl-carrier-protein] S-acetyltransferase activity (GO:0004313)	1	1	.02	+	62.98	3.10E-02	6.47E-01
glycine binding (GO:0016594)	14	2	.22	+	9.00	2.53E-02	6.47E-01
palmitoyl-[acyl-carrier-protein] hydrolase activity (GO:0016296)	2	1	.03	+	31.49	4.62E-02	6.49E-01
fumarylacetoacetase activity (GO:0004334)	1	1	.02	+	62.98	3.10E-02	6.50E-01
acyl-[acyl-carrier-protein] hydrolase activity (GO:0016297)	2	1	.03	+	31.49	4.62E-02	6.51E-01
lead ion binding (GO:0032791)	2	1	.03	+	31.49	4.62E-02	6.52E-01
glucose-6-phosphate isomerase activity (GO:0004347)	1	1	.02	+	62.98	3.10E-02	6.53E-01
phytanate-CoA ligase activity (GO:0050197)	2	1	.03	+	31.49	4.62E-02	6.54E-01
glutathione synthase activity (GO:0004363)	1	1	.02	+	62.98	3.10E-02	6.56E-01
[acyl-carrier-protein] S-malonyltransferase activity (GO:0004314)	2	1	.03	+	31.49	4.62E-02	6.56E-01
3-oxoacyl-[acyl-carrier-protein] synthase activity (GO:0004315)	2	1	.03	+	31.49	4.62E-02	6.58E-01
D-lactate dehydrogenase activity (GO:0008720)	1	1	.02	+	62.98	3.10E-02	6.59E-01
3-oxoacyl-[acyl-carrier-protein] reductase (NADPH) activity (GO:0004316)	2	1	.03	+	31.49	4.62E-02	6.60E-01
glycine dehydrogenase (decarboxylating) activity (GO:0004375)	1	1	.02	+	62.98	3.10E-02	6.61E-01
3-hydroxypalmitoyl-[acyl-carrier-protein] dehydratase activity (GO:0004317)	2	1	.03	+	31.49	4.62E-02	6.62E-01
oleoyl-[acyl-carrier-protein] hydrolase activity (GO:0004320)	2	1	.03	+	31.49	4.62E-02	6.64E-01
ribitol 2-dehydrogenase activity (GO:0050255)	1	1	.02	+	62.98	3.10E-02	6.64E-01
S-(hydroxymethyl)glutathione dehydrogenase activity (GO:0051903)	2	1	.03	+	31.49	4.62E-02	6.66E-01
L-iditol 2-dehydrogenase activity (GO:0003939)	1	1	.02	+	62.98	3.10E-02	6.67E-01
geranyltranstransferase activity (GO:0004337)	2	1	.03	+	31.49	4.62E-02	6.68E-01
glucose-6-phosphate dehydrogenase activity (GO:0004345)	2	1	.03	+	31.49	4.62E-02	6.70E-01
UDP-N-acetylglucosamine-dolichyl-phosphate N-acetylglucosaminephosphotransferase activity (GO:0003975)	1	1	.02	+	62.98	3.10E-02	6.70E-01
3-hydroxyoctanoyl-[acyl-carrier-protein] dehydratase activity (GO:0047451)	2	1	.03	+	31.49	4.62E-02	6.72E-01
adenine phosphoribosyltransferase activity (GO:0003999)	1	1	.02	+	62.98	3.10E-02	6.73E-01
glutathione-disulfide reductase (NADPH) activity (GO:0004362)	2	1	.03	+	31.49	4.62E-02	6.74E-01
glycerol-3-phosphate dehydrogenase [NAD+] activity (GO:0004367)	2	1	.03	+	31.49	4.62E-02	6.76E-01
methylglyoxal reductase (NADPH-dependent, acetol producing) (GO:1990002)	1	1	.02	+	62.98	3.10E-02	6.76E-01
glycerol-3-phosphate dehydrogenase (quinone) activity (GO:0004368)	2	1	.03	+	31.49	4.62E-02	6.78E-01
flavin adenine dinucleotide binding (GO:0050660)	86	4	1.37	+	2.93	5.27E-02	6.79E-01
phosphopantetheine binding (GO:0031177)	1	1	.02	+	62.98	3.10E-02	6.79E-01
dipeptidase activity (GO:0016805)	15	2	.24	+	8.40	2.84E-02	6.80E-01
glycine hydroxymethyltransferase activity (GO:0004372)	2	1	.03	+	31.49	4.62E-02	6.80E-01
acid-amino acid ligase activity (GO:0016881)	22	2	.35	+	5.73	5.36E-02	6.81E-01
DNA-binding transcription activator activity, RNA polymerase II-specific (GO:0001228)	455	2	7.22	-	.28	5.30E-02	6.82E-01
L-allo-threonine aldolase activity (GO:0008732)	2	1	.03	+	31.49	4.62E-02	6.82E-01
homogentisate 1,2-dioxygenase activity (GO:0004411)	1	1	.02	+	62.98	3.10E-02	6.82E-01
alcohol dehydrogenase (NADP+) activity (GO:0008106)	22	2	.35	+	5.73	5.36E-02	6.83E-01
nucleotidase activity (GO:0008252)	15	2	.24	+	8.40	2.84E-02	6.83E-01
DNA-binding transcription activator activity (GO:0001216)	461	2	7.32	-	.27	5.40E-02	6.83E-01
hydrolase activity, acting on carbon-nitrogen (but not peptide) bonds, in linear amides (GO:0016811)	70	4	1.11	+	3.60	2.87E-02	6.84E-01
3-oxo-glutaryl-[acp] methyl ester reductase activity (GO:0102131)	2	1	.03	+	31.49	4.62E-02	6.84E-01
fatty acid ligase activity (GO:0015645)	22	2	.35	+	5.73	5.36E-02	6.84E-01
D-lactate dehydrogenase (cytochrome) activity (GO:0004458)	1	1	.02	+	62.98	3.10E-02	6.85E-01
SHG alpha-glucan phosphorylase activity (GO:0102499)	3	1	.05	+	20.99	6.11E-02	6.86E-01
CoA hydrolase activity (GO:0016289)	22	2	.35	+	5.73	5.36E-02	6.86E-01
ubiquitin-like protein transferase activity (GO:0019787)	463	2	7.35	-	.27	5.43E-02	6.86E-01
aldehyde dehydrogenase (NAD+) activity (GO:0004029)	15	2	.24	+	8.40	2.84E-02	6.86E-01
3-oxo-pimeloyl-[acp] methyl ester reductase activity (GO:0102132)	2	1	.03	+	31.49	4.62E-02	6.86E-01
transketolase activity (GO:0004802)	3	1	.05	+	20.99	6.11E-02	6.87E-01
cysteine-type peptidase activity (GO:0008234)	198	7	3.14	+	2.23	4.27E-02	6.87E-01
fatty-acyl-CoA binding (GO:0000062)	22	2	.35	+	5.73	5.36E-02	6.88E-01
glycerol dehydrogenase [NAD(P)+] activity (GO:1990042)	2	1	.03	+	31.49	4.62E-02	6.88E-01
7-dehydrocholesterol reductase activity (GO:0047598)	1	1	.02	+	62.98	3.10E-02	6.89E-01
ubiquitin activating enzyme activity (GO:0004839)	3	1	.05	+	20.99	6.11E-02	6.89E-01
lipid binding (GO:0008289)	795	20	12.62	+	1.58	4.30E-02	6.90E-01
carbonate dehydratase activity (GO:0004089)	15	2	.24	+	8.40	2.84E-02	6.90E-01
hydrolase activity, acting on acid carbon-carbon bonds (GO:0016822)	3	1	.05	+	20.99	6.11E-02	6.91E-01
isocitrate dehydrogenase (NADP+) activity (GO:0004450)	2	1	.03	+	31.49	4.62E-02	6.91E-01
cholesterol transfer activity (GO:0120020)	24	2	.38	+	5.25	6.19E-02	6.92E-01
complement component C3a binding (GO:0001850)	1	1	.02	+	62.98	3.10E-02	6.92E-01
hydrolase activity, acting on acid carbon-carbon bonds, in ketonic substances (GO:0016823)	3	1	.05	+	20.99	6.11E-02	6.92E-01
S-acetyltransferase activity (GO:0016418)	2	1	.03	+	31.49	4.62E-02	6.93E-01
palmitoyl-CoA hydrolase activity (GO:0016290)	15	2	.24	+	8.40	2.84E-02	6.93E-01
proton channel activity (GO:0015252)	24	2	.38	+	5.25	6.19E-02	6.93E-01
hexose phosphate transmembrane transporter activity (GO:0015119)	3	1	.05	+	20.99	6.11E-02	6.94E-01
fatty acid binding (GO:0005504)	39	3	.62	+	4.84	2.77E-02	6.95E-01
S-malonyltransferase activity (GO:0016419)	2	1	.03	+	31.49	4.62E-02	6.95E-01
phenanthrene-epoxide hydrolase activity (GO:0019118)	1	1	.02	+	62.98	3.10E-02	6.95E-01
carnitine transmembrane transporter activity (GO:0015226)	3	1	.05	+	20.99	6.11E-02	6.95E-01
G protein activity (GO:0003925)	40	3	.64	+	4.72	2.95E-02	6.96E-01
GTPase activating protein binding (GO:0032794)	15	2	.24	+	8.40	2.84E-02	6.97E-01
malonyltransferase activity (GO:0016420)	2	1	.03	+	31.49	4.62E-02	6.97E-01
NADP+ binding (GO:0070401)	3	1	.05	+	20.99	6.11E-02	6.97E-01
phosphatase binding (GO:0019902)	199	7	3.16	+	2.22	4.36E-02	6.98E-01
phenanthrene-9,10-epoxide hydrolase activity (GO:0019119)	1	1	.02	+	62.98	3.10E-02	6.98E-01
endopeptidase inhibitor activity (GO:0004866)	182	7	2.89	+	2.42	2.94E-02	6.98E-01
glycogen phosphorylase activity (GO:0008184)	3	1	.05	+	20.99	6.11E-02	6.99E-01
DNA clamp unloader activity (GO:0061860)	2	1	.03	+	31.49	4.62E-02	6.99E-01
mannosidase activity (GO:0015923)	15	2	.24	+	8.40	2.84E-02	7.00E-01
organophosphate:inorganic phosphate antiporter activity (GO:0015315)	3	1	.05	+	20.99	6.11E-02	7.00E-01
3-hydroxyacyl-[acyl-carrier-protein] dehydratase activity (GO:0019171)	2	1	.03	+	31.49	4.62E-02	7.01E-01
3,4-dihydrocoumarin hydrolase activity (GO:0018733)	1	1	.02	+	62.98	3.10E-02	7.01E-01
proteinase activated receptor binding (GO:0031871)	3	1	.05	+	20.99	6.11E-02	7.02E-01
monophenol monooxygenase activity (GO:0004503)	2	1	.03	+	31.49	4.62E-02	7.04E-01
cytoskeletal protein-membrane anchor activity (GO:0106006)	3	1	.05	+	20.99	6.11E-02	7.04E-01
long-chain fatty acid-CoA ligase activity (GO:0004467)	15	2	.24	+	8.40	2.84E-02	7.04E-01
phospho-N-acetylmuramoyl-pentapeptide-transferase activity (GO:0008963)	1	1	.02	+	62.98	3.10E-02	7.05E-01
high-density lipoprotein particle receptor binding (GO:0070653)	3	1	.05	+	20.99	6.11E-02	7.05E-01
alanine-oxo-acid transaminase activity (GO:0047635)	2	1	.03	+	31.49	4.62E-02	7.06E-01
3 iron, 4 sulfur cluster binding (GO:0051538)	3	1	.05	+	20.99	6.11E-02	7.07E-01
opsonin binding (GO:0001846)	15	2	.24	+	8.40	2.84E-02	7.07E-01
(R)-carnitine transmembrane transporter activity (GO:1901235)	1	1	.02	+	62.98	3.10E-02	7.08E-01
mannosyl-oligosaccharide 1,3-1,6-alpha-mannosidase activity (GO:0004572)	2	1	.03	+	31.49	4.62E-02	7.08E-01
N-terminal myristoylation domain binding (GO:0031997)	3	1	.05	+	20.99	6.11E-02	7.09E-01
phosphatidylserine decarboxylase activity (GO:0004609)	2	1	.03	+	31.49	4.62E-02	7.10E-01
retinol transmembrane transporter activity (GO:0034632)	3	1	.05	+	20.99	6.11E-02	7.10E-01
hexitol dehydrogenase activity (GO:0031320)	1	1	.02	+	62.98	3.10E-02	7.11E-01
transmembrane signaling receptor activity (GO:0004888)	1386	13	22.01	-	.59	4.46E-02	7.12E-01
hexose-phosphate:inorganic phosphate antiporter activity (GO:0015526)	3	1	.05	+	20.99	6.11E-02	7.12E-01
phosphoenolpyruvate carboxykinase activity (GO:0004611)	2	1	.03	+	31.49	4.62E-02	7.13E-01
protein-glycine ligase activity (GO:0070735)	3	1	.05	+	20.99	6.11E-02	7.14E-01
phosphomevalonate kinase activity (GO:0004631)	1	1	.02	+	62.98	3.10E-02	7.15E-01
phosphoenolpyruvate carboxykinase (GTP) activity (GO:0004613)	2	1	.03	+	31.49	4.62E-02	7.15E-01
L-aspartate:2-oxoglutarate aminotransferase activity (GO:0004069)	3	1	.05	+	20.99	6.11E-02	7.15E-01
bis(5'-adenosyl)-triphosphatase activity (GO:0047710)	2	1	.03	+	31.49	4.62E-02	7.17E-01
protein kinase C inhibitor activity (GO:0008426)	3	1	.05	+	20.99	6.11E-02	7.17E-01
fatty acid derivative binding (GO:1901567)	23	2	.37	+	5.48	5.77E-02	7.18E-01
O-phospho-L-serine:2-oxoglutarate aminotransferase activity (GO:0004648)	1	1	.02	+	62.98	3.10E-02	7.18E-01
calcium-dependent protein kinase inhibitor activity (GO:0008427)	3	1	.05	+	20.99	6.11E-02	7.19E-01
glutaminyl-peptide cyclotransferase activity (GO:0016603)	2	1	.03	+	31.49	4.62E-02	7.19E-01
ATPase activity, coupled to transmembrane movement of ions, rotational mechanism (GO:0044769)	23	2	.37	+	5.48	5.77E-02	7.19E-01
ATPase-coupled cation transmembrane transporter activity (GO:0019829)	53	3	.84	+	3.56	5.72E-02	7.20E-01
G-protein beta/gamma-subunit complex binding (GO:0031683)	20	2	.32	+	6.30	4.58E-02	7.21E-01
alpha-1,3-mannosylglycoprotein 4-beta-N-acetylglucosaminyltransferase activity (GO:0008454)	3	1	.05	+	20.99	6.11E-02	7.21E-01
proton-transporting ATPase activity, rotational mechanism (GO:0046961)	23	2	.37	+	5.48	5.77E-02	7.21E-01
porphobilinogen synthase activity (GO:0004655)	1	1	.02	+	62.98	3.10E-02	7.22E-01
cholate-CoA ligase activity (GO:0047747)	2	1	.03	+	31.49	4.62E-02	7.22E-01
procollagen-lysine 5-dioxygenase activity (GO:0008475)	3	1	.05	+	20.99	6.11E-02	7.22E-01
C-acyltransferase activity (GO:0016408)	20	2	.32	+	6.30	4.58E-02	7.23E-01
ATPase-coupled ion transmembrane transporter activity (GO:0042625)	23	2	.37	+	5.48	5.77E-02	7.23E-01
citrate dehydratase activity (GO:0047780)	2	1	.03	+	31.49	4.62E-02	7.24E-01
ICAM-3 receptor activity (GO:0030369)	3	1	.05	+	20.99	6.11E-02	7.24E-01
ubiquitin-protein transferase regulator activity (GO:0055106)	23	2	.37	+	5.48	5.77E-02	7.25E-01
protein histidine kinase activity (GO:0004673)	1	1	.02	+	62.98	3.10E-02	7.25E-01
acyl-CoA hydrolase activity (GO:0047617)	20	2	.32	+	6.30	4.58E-02	7.25E-01
dATP binding (GO:0032564)	3	1	.05	+	20.99	6.11E-02	7.26E-01
glycosaminoglycan binding (GO:0005539)	234	8	3.72	+	2.15	5.86E-02	7.27E-01
oxidoreductase activity, acting on the CH-NH2 group of donors (GO:0016638)	20	2	.32	+	6.30	4.58E-02	7.28E-01
lactose binding (GO:0030395)	3	1	.05	+	20.99	6.11E-02	7.28E-01
oxidoreductase activity, acting on the CH-NH2 group of donors, disulfide as acceptor (GO:0016642)	1	1	.02	+	62.98	3.10E-02	7.28E-01
palmitoyl-CoA ligase activity (GO:0090433)	3	1	.05	+	20.99	6.11E-02	7.30E-01
organic cation transmembrane transporter activity (GO:0015101)	25	2	.40	+	5.04	6.62E-02	7.31E-01
glucose 6-phosphate:inorganic phosphate antiporter activity (GO:0061513)	3	1	.05	+	20.99	6.11E-02	7.31E-01
sterol transfer activity (GO:0120015)	25	2	.40	+	5.04	6.62E-02	7.33E-01
ubiquitin binding (GO:0043130)	93	4	1.48	+	2.71	6.57E-02	7.33E-01
purine nucleobase binding (GO:0002060)	3	1	.05	+	20.99	6.11E-02	7.33E-01
active ion transmembrane transporter activity (GO:0022853)	248	8	3.94	+	2.03	6.60E-02	7.34E-01
acyl-CoA binding (GO:0120227)	25	2	.40	+	5.04	6.62E-02	7.34E-01
6-phosphofructokinase activity (GO:0003872)	3	1	.05	+	20.99	6.11E-02	7.35E-01
electron transfer activity (GO:0009055)	129	5	2.05	+	2.44	5.95E-02	7.36E-01
calcium-dependent phospholipid binding (GO:0005544)	54	3	.86	+	3.50	5.97E-02	7.37E-01
NADPH dehydrogenase (quinone) activity (GO:0008753)	3	1	.05	+	20.99	6.11E-02	7.37E-01
GMP binding (GO:0019002)	3	1	.05	+	20.99	6.11E-02	7.39E-01
UDP-N-acetylglucosamine-lysosomal-enzyme N-acetylglucosaminephosphotransferase activity (GO:0003976)	3	1	.05	+	20.99	6.11E-02	7.40E-01
aconitate hydratase activity (GO:0003994)	3	1	.05	+	20.99	6.11E-02	7.42E-01
mercury ion binding (GO:0045340)	3	1	.05	+	20.99	6.11E-02	7.44E-01
DNA-binding transcription repressor activity (GO:0001217)	319	1	5.06	-	.20	6.80E-02	7.46E-01
linear malto-oligosaccharide phosphorylase activity (GO:0102250)	3	1	.05	+	20.99	6.11E-02	7.46E-01
ubiquitin-like protein ligase activity (GO:0061659)	318	1	5.05	-	.20	6.79E-02	7.47E-01
lysophosphatidic acid phosphatase activity (GO:0052642)	3	1	.05	+	20.99	6.11E-02	7.48E-01
DNA-binding transcription repressor activity, RNA polymerase II-specific (GO:0001227)	317	1	5.03	-	.20	6.79E-02	7.49E-01
Rho GDP-dissociation inhibitor activity (GO:0005094)	3	1	.05	+	20.99	6.11E-02	7.50E-01
heat shock protein binding (GO:0031072)	130	5	2.06	+	2.42	6.10E-02	7.51E-01
organic acid binding (GO:0043177)	135	5	2.14	+	2.33	6.90E-02	7.56E-01
MHC protein complex binding (GO:0023023)	26	2	.41	+	4.84	7.05E-02	7.71E-01
scaffold protein binding (GO:0097110)	60	3	.95	+	3.15	7.58E-02	7.82E-01
acetyltransferase activity (GO:0016407)	98	4	1.56	+	2.57	7.60E-02	7.83E-01
oxidoreductase activity, acting on superoxide radicals as acceptor (GO:0016721)	4	1	.06	+	15.75	7.57E-02	7.84E-01
superoxide dismutase activity (GO:0004784)	4	1	.06	+	15.75	7.57E-02	7.85E-01
apolipoprotein A-I receptor binding (GO:0034191)	4	1	.06	+	15.75	7.57E-02	7.87E-01
citrate transmembrane transporter activity (GO:0015137)	4	1	.06	+	15.75	7.57E-02	7.89E-01
tricarboxylic acid transmembrane transporter activity (GO:0015142)	4	1	.06	+	15.75	7.57E-02	7.90E-01
very-low-density lipoprotein particle receptor binding (GO:0070326)	4	1	.06	+	15.75	7.57E-02	7.92E-01
ubiquitin ligase activator activity (GO:1990757)	4	1	.06	+	15.75	7.57E-02	7.94E-01
acyltransferase activity (GO:0016746)	263	8	4.18	+	1.92	7.72E-02	7.94E-01
MHC class Ib protein complex binding (GO:0023025)	4	1	.06	+	15.75	7.57E-02	7.95E-01
acetyltransferase activator activity (GO:0010698)	4	1	.06	+	15.75	7.57E-02	7.97E-01
platelet-activating factor acetyltransferase activity (GO:0047179)	4	1	.06	+	15.75	7.57E-02	7.99E-01
adenyl deoxyribonucleotide binding (GO:0032558)	4	1	.06	+	15.75	7.57E-02	8.01E-01
peptidyl-lysine 5-dioxygenase activity (GO:0070815)	4	1	.06	+	15.75	7.57E-02	8.02E-01
alcohol transmembrane transporter activity (GO:0015665)	4	1	.06	+	15.75	7.57E-02	8.04E-01
calcium-dependent protein kinase regulator activity (GO:0010858)	4	1	.06	+	15.75	7.57E-02	8.06E-01
ATP-dependent microtubule motor activity (GO:1990939)	61	3	.97	+	3.10	7.86E-02	8.06E-01
serine binding (GO:0070905)	4	1	.06	+	15.75	7.57E-02	8.08E-01
single-stranded DNA 5'-3' exodeoxyribonuclease activity (GO:0045145)	4	1	.06	+	15.75	7.57E-02	8.09E-01
chemorepellent activity (GO:0045499)	28	2	.44	+	4.50	7.96E-02	8.11E-01
CD8 receptor binding (GO:0042610)	4	1	.06	+	15.75	7.57E-02	8.11E-01
ionotropic glutamate receptor binding (GO:0035255)	27	2	.43	+	4.67	7.50E-02	8.12E-01
fibronectin binding (GO:0001968)	28	2	.44	+	4.50	7.96E-02	8.13E-01
disaccharide binding (GO:0048030)	4	1	.06	+	15.75	7.57E-02	8.13E-01
dynein light intermediate chain binding (GO:0051959)	27	2	.43	+	4.67	7.50E-02	8.14E-01
oxidoreductase activity, acting on the CH-CH group of donors, NAD or NADP as acceptor (GO:0016628)	28	2	.44	+	4.50	7.96E-02	8.14E-01
PH domain binding (GO:0042731)	4	1	.06	+	15.75	7.57E-02	8.15E-01
CoA-ligase activity (GO:0016405)	27	2	.43	+	4.67	7.50E-02	8.16E-01
allyl-alcohol dehydrogenase activity (GO:0047655)	4	1	.06	+	15.75	7.57E-02	8.17E-01
ubiquitin-protein transferase activity (GO:0004842)	437	2	6.94	-	.29	7.49E-02	8.17E-01
serine-type endopeptidase inhibitor activity (GO:0004867)	100	4	1.59	+	2.52	8.03E-02	8.17E-01
scavenger receptor binding (GO:0005124)	4	1	.06	+	15.75	7.57E-02	8.18E-01
molecular adaptor activity (GO:0060090)	353	10	5.60	+	1.78	8.16E-02	8.28E-01
lipoprotein particle receptor binding (GO:0070325)	29	2	.46	+	4.34	8.42E-02	8.49E-01
aldo-keto reductase (NADP) activity (GO:0004033)	29	2	.46	+	4.34	8.42E-02	8.51E-01
dynein intermediate chain binding (GO:0045505)	29	2	.46	+	4.34	8.42E-02	8.53E-01
triglyceride binding (GO:0017129)	5	1	.08	+	12.60	9.02E-02	8.63E-01
protein-lysine 6-oxidase activity (GO:0004720)	5	1	.08	+	12.60	9.02E-02	8.65E-01
transketolase or transaldolase activity (GO:0016744)	5	1	.08	+	12.60	9.02E-02	8.67E-01
glutathione disulfide oxidoreductase activity (GO:0015038)	5	1	.08	+	12.60	9.02E-02	8.68E-01
collagen binding involved in cell-matrix adhesion (GO:0098639)	5	1	.08	+	12.60	9.02E-02	8.70E-01
ATP:ADP antiporter activity (GO:0005471)	5	1	.08	+	12.60	9.02E-02	8.72E-01
cobalt ion binding (GO:0050897)	5	1	.08	+	12.60	9.02E-02	8.74E-01
type 2A serotonin receptor binding (GO:0031826)	5	1	.08	+	12.60	9.02E-02	8.75E-01
steroid binding (GO:0005496)	103	4	1.64	+	2.45	8.71E-02	8.76E-01
C-X3-C chemokine binding (GO:0019960)	5	1	.08	+	12.60	9.02E-02	8.77E-01
carbonyl reductase (NADPH) activity (GO:0004090)	5	1	.08	+	12.60	9.02E-02	8.79E-01
purine deoxyribonucleotide binding (GO:0032554)	5	1	.08	+	12.60	9.02E-02	8.81E-01
adenylate cyclase activator activity (GO:0010856)	5	1	.08	+	12.60	9.02E-02	8.82E-01
N-acetylgalactosamine 4-O-sulfotransferase activity (GO:0001537)	5	1	.08	+	12.60	9.02E-02	8.84E-01
selenocysteine insertion sequence binding (GO:0035368)	5	1	.08	+	12.60	9.02E-02	8.86E-01
nucleobase binding (GO:0002054)	5	1	.08	+	12.60	9.02E-02	8.88E-01
pyrophosphate hydrolysis-driven proton transmembrane transporter activity (GO:0009678)	31	2	.49	+	4.06	9.37E-02	8.88E-01
cell adhesive protein binding involved in bundle of His cell-Purkinje myocyte communication (GO:0086083)	5	1	.08	+	12.60	9.02E-02	8.90E-01
acid-thiol ligase activity (GO:0016878)	31	2	.49	+	4.06	9.37E-02	8.90E-01
acetyl-CoA hydrolase activity (GO:0003986)	5	1	.08	+	12.60	9.02E-02	8.91E-01
organophosphate ester transmembrane transporter activity (GO:0015605)	31	2	.49	+	4.06	9.37E-02	8.92E-01
signaling receptor activity (GO:0038023)	1609	17	25.55	-	.67	9.45E-02	8.93E-01
isocitrate dehydrogenase activity (GO:0004448)	5	1	.08	+	12.60	9.02E-02	8.93E-01
metallocarboxypeptidase activity (GO:0004181)	30	2	.48	+	4.20	8.89E-02	8.93E-01
manganese ion binding (GO:0030145)	66	3	1.05	+	2.86	9.35E-02	8.93E-01
nucleocytoplasmic carrier activity (GO:0140142)	31	2	.49	+	4.06	9.37E-02	8.93E-01
molecular transducer activity (GO:0060089)	1609	17	25.55	-	.67	9.45E-02	8.94E-01
L-lactate dehydrogenase activity (GO:0004459)	5	1	.08	+	12.60	9.02E-02	8.95E-01
oxidative phosphorylation uncoupler activity (GO:0017077)	5	1	.08	+	12.60	9.02E-02	8.97E-01
fructose-6-phosphate binding (GO:0070095)	5	1	.08	+	12.60	9.02E-02	8.99E-01
phospholipase D activity (GO:0004630)	5	1	.08	+	12.60	9.02E-02	9.01E-01
TRAIL binding (GO:0045569)	5	1	.08	+	12.60	9.02E-02	9.02E-01
protein-arginine deiminase activity (GO:0004668)	5	1	.08	+	12.60	9.02E-02	9.04E-01
chaperone binding (GO:0051087)	107	4	1.70	+	2.35	9.64E-02	9.07E-01
protein-macromolecule adaptor activity (GO:0030674)	282	8	4.48	+	1.79	9.63E-02	9.07E-01
ubiquitin protein ligase activity (GO:0061630)	307	1	4.87	-	.21	9.88E-02	9.25E-01
peptide antigen binding (GO:0042605)	32	2	.51	+	3.94	9.86E-02	9.25E-01
transmembrane transporter activity (GO:0022857)	1085	24	17.23	+	1.39	1.05E-01	9.41E-01
pyruvate dehydrogenase activity (GO:0004738)	6	1	.10	+	10.50	1.04E-01	9.42E-01
phosphotransferase activity, nitrogenous group as acceptor (GO:0016775)	6	1	.10	+	10.50	1.04E-01	9.44E-01
apolipoprotein receptor binding (GO:0034190)	6	1	.10	+	10.50	1.04E-01	9.45E-01
molybdopterin cofactor binding (GO:0043546)	6	1	.10	+	10.50	1.04E-01	9.47E-01
purine nucleobase transmembrane transporter activity (GO:0005345)	6	1	.10	+	10.50	1.04E-01	9.49E-01
BH3 domain binding (GO:0051434)	6	1	.10	+	10.50	1.04E-01	9.51E-01
phospholipase A2 inhibitor activity (GO:0019834)	6	1	.10	+	10.50	1.04E-01	9.53E-01
pyruvate dehydrogenase [NAD(P)+] activity (GO:0034603)	6	1	.10	+	10.50	1.04E-01	9.54E-01
ubiquitin-like protein binding (GO:0032182)	111	4	1.76	+	2.27	1.06E-01	9.55E-01
pyruvate dehydrogenase (NAD+) activity (GO:0034604)	6	1	.10	+	10.50	1.04E-01	9.56E-01
protein phosphatase binding (GO:0019903)	153	5	2.43	+	2.06	1.02E-01	9.58E-01
deoxyribonucleotide binding (GO:0032552)	6	1	.10	+	10.50	1.04E-01	9.58E-01
pre-miRNA binding (GO:0070883)	6	1	.10	+	10.50	1.04E-01	9.60E-01
microtubule motor activity (GO:0003777)	69	3	1.10	+	2.74	1.03E-01	9.61E-01
epoxide hydrolase activity (GO:0004301)	6	1	.10	+	10.50	1.04E-01	9.62E-01
coreceptor activity involved in Wnt signaling pathway, planar cell polarity pathway (GO:1904929)	6	1	.10	+	10.50	1.04E-01	9.63E-01
epidermal growth factor receptor binding (GO:0005154)	33	2	.52	+	3.82	1.04E-01	9.64E-01
ankyrin repeat binding (GO:0071532)	6	1	.10	+	10.50	1.04E-01	9.65E-01
laminin-1 binding (GO:0043237)	6	1	.10	+	10.50	1.04E-01	9.67E-01
keratin filament binding (GO:1990254)	6	1	.10	+	10.50	1.04E-01	9.69E-01
protein serine/threonine kinase inhibitor activity (GO:0030291)	34	2	.54	+	3.70	1.09E-01	9.70E-01
1,4-alpha-oligoglucan phosphorylase activity (GO:0004645)	6	1	.10	+	10.50	1.04E-01	9.71E-01
enzyme regulator activity (GO:0030234)	934	21	14.83	+	1.42	1.08E-01	9.71E-01
solute:anion antiporter activity (GO:0140323)	34	2	.54	+	3.70	1.09E-01	9.72E-01
protein heterodimerization activity (GO:0046982)	321	9	5.10	+	1.77	1.09E-01	9.74E-01
growth hormone receptor binding (GO:0005131)	9	0	.14	-	< 0.01	1.00E00	1.00E00
granulocyte colony-stimulating factor receptor binding (GO:0005130)	1	0	.02	-	< 0.01	1.00E00	1.00E00
14-3-3 protein binding (GO:0071889)	32	0	.51	-	< 0.01	1.00E00	1.00E00
neuromedin U binding (GO:0042924)	2	0	.03	-	< 0.01	1.00E00	1.00E00
neuropeptide binding (GO:0042923)	26	1	.41	+	2.42	3.47E-01	1.00E00
neuromedin U receptor binding (GO:0042922)	1	0	.02	-	< 0.01	1.00E00	1.00E00
1-(4-iodo-2,5-dimethoxyphenyl)propan-2-amine binding (GO:0071886)	2	0	.03	-	< 0.01	1.00E00	1.00E00
N-terminal protein N-methyltransferase activity (GO:0071885)	2	0	.03	-	< 0.01	1.00E00	1.00E00
granulocyte macrophage colony-stimulating factor receptor binding (GO:0005129)	1	0	.02	-	< 0.01	1.00E00	1.00E00
erythropoietin receptor binding (GO:0005128)	2	0	.03	-	< 0.01	1.00E00	1.00E00
ciliary neurotrophic factor receptor binding (GO:0005127)	9	0	.14	-	< 0.01	1.00E00	1.00E00
cytokine receptor binding (GO:0005126)	270	5	4.29	+	1.17	6.23E-01	1.00E00
cytokine activity (GO:0005125)	233	2	3.70	-	.54	5.93E-01	1.00E00
death receptor binding (GO:0005123)	21	0	.33	-	< 0.01	1.00E00	1.00E00
Toll binding (GO:0005121)	1	0	.02	-	< 0.01	1.00E00	1.00E00
lactosylceramide 4-alpha-galactosyltransferase activity (GO:0050512)	1	0	.02	-	< 0.01	1.00E00	1.00E00
N-acetylgalactosaminyl-proteoglycan 3-beta-glucuronosyltransferase activity (GO:0050510)	4	0	.06	-	< 0.01	1.00E00	1.00E00
xenobiotic transmembrane transporter activity (GO:0042910)	31	1	.49	+	2.03	3.96E-01	1.00E00
inositol trisphosphate phosphatase activity (GO:0046030)	11	0	.17	-	< 0.01	1.00E00	1.00E00
smoothened binding (GO:0005119)	3	0	.05	-	< 0.01	1.00E00	1.00E00
Tat protein binding (GO:0030957)	10	0	.16	-	< 0.01	1.00E00	1.00E00
receptor tyrosine kinase-like orphan receptor binding (GO:0005115)	1	0	.02	-	< 0.01	1.00E00	1.00E00
type II transforming growth factor beta receptor binding (GO:0005114)	8	0	.13	-	< 0.01	1.00E00	1.00E00
N-acetylglucosaminyl-proteoglycan 4-beta-glucuronosyltransferase activity (GO:0050509)	2	0	.03	-	< 0.01	1.00E00	1.00E00
patched binding (GO:0005113)	8	1	.13	+	7.87	1.32E-01	1.00E00
glucuronosyl-N-acetylglucosaminyl-proteoglycan 4-alpha-N-acetylglucosaminyltransferase activity (GO:0050508)	3	0	.05	-	< 0.01	1.00E00	1.00E00
Notch binding (GO:0005112)	25	0	.40	-	< 0.01	1.00E00	1.00E00
type 2 fibroblast growth factor receptor binding (GO:0005111)	5	0	.08	-	< 0.01	1.00E00	1.00E00
hyaluronan synthase activity (GO:0050501)	4	0	.06	-	< 0.01	1.00E00	1.00E00
tubulin deacetylase activity (GO:0042903)	2	0	.03	-	< 0.01	1.00E00	1.00E00
sn-1-glycerol-3-phosphate C16:0-DCA-CoA acyl transferase activity (GO:0102420)	4	0	.06	-	< 0.01	1.00E00	1.00E00
frizzled binding (GO:0005109)	39	0	.62	-	< 0.01	1.00E00	1.00E00
type 1 fibroblast growth factor receptor binding (GO:0005105)	6	0	.10	-	< 0.01	1.00E00	1.00E00
mitochondrion targeting sequence binding (GO:0030943)	5	0	.08	-	< 0.01	1.00E00	1.00E00
fibroblast growth factor receptor binding (GO:0005104)	26	0	.41	-	< 0.01	1.00E00	1.00E00
endoplasmic reticulum signal peptide binding (GO:0030942)	3	0	.05	-	< 0.01	1.00E00	1.00E00
5'-3' RNA polymerase activity (GO:0034062)	42	0	.67	-	< 0.01	1.00E00	1.00E00
DNA polymerase activity (GO:0034061)	41	0	.65	-	< 0.01	1.00E00	1.00E00
neuropeptide receptor binding (GO:0071855)	40	0	.64	-	< 0.01	1.00E00	1.00E00
RNA strand-exchange activity (GO:0034057)	2	0	.03	-	< 0.01	1.00E00	1.00E00
estrogen response element binding (GO:0034056)	3	0	.05	-	< 0.01	1.00E00	1.00E00
benzoate-CoA ligase activity (GO:0018858)	3	0	.05	-	< 0.01	1.00E00	1.00E00
oxidoreductase activity, acting on diphenols and related substances as donors (GO:0016679)	10	0	.16	-	< 0.01	1.00E00	1.00E00
oxidoreductase activity, acting on a heme group of donors (GO:0016675)	23	0	.37	-	< 0.01	1.00E00	1.00E00
oxidoreductase activity, acting on a sulfur group of donors, quinone or similar compound as acceptor (GO:0016672)	3	0	.05	-	< 0.01	1.00E00	1.00E00
oxidoreductase activity, acting on a sulfur group of donors, disulfide as acceptor (GO:0016671)	8	1	.13	+	7.87	1.32E-01	1.00E00
oxidoreductase activity, acting on a sulfur group of donors, oxygen as acceptor (GO:0016670)	12	0	.19	-	< 0.01	1.00E00	1.00E00
UTP diphosphatase activity (GO:0036221)	1	0	.02	-	< 0.01	1.00E00	1.00E00
poly(G) binding (GO:0034046)	8	0	.13	-	< 0.01	1.00E00	1.00E00
ABC-type sterol transporter activity (GO:0034041)	2	0	.03	-	< 0.01	1.00E00	1.00E00
ATPase-coupled lipid transmembrane transporter activity (GO:0034040)	8	0	.13	-	< 0.01	1.00E00	1.00E00
HMG box domain binding (GO:0071837)	14	0	.22	-	< 0.01	1.00E00	1.00E00
oxidoreductase activity, acting on other nitrogenous compounds as donors, cytochrome as acceptor (GO:0016662)	4	0	.06	-	< 0.01	1.00E00	1.00E00
oxidoreductase activity, acting on other nitrogenous compounds as donors (GO:0016661)	7	0	.11	-	< 0.01	1.00E00	1.00E00
dTTP diphosphatase activity (GO:0036218)	5	0	.08	-	< 0.01	1.00E00	1.00E00
8-oxo-7,8-dihydroguanine DNA N-glycosylase activity (GO:0034039)	2	0	.03	-	< 0.01	1.00E00	1.00E00
deoxyhypusine synthase activity (GO:0034038)	1	0	.02	-	< 0.01	1.00E00	1.00E00
TPR domain binding (GO:0030911)	8	1	.13	+	7.87	1.32E-01	1.00E00
oxidoreductase activity, acting on NAD(P)H, nitrogenous group as acceptor (GO:0016657)	2	0	.03	-	< 0.01	1.00E00	1.00E00
N-box binding (GO:0071820)	2	0	.03	-	< 0.01	1.00E00	1.00E00
oxidoreductase activity, acting on NAD(P)H, quinone or similar compound as acceptor (GO:0016655)	58	2	.92	+	2.17	2.41E-01	1.00E00
oxidoreductase activity, acting on NAD(P)H, NAD(P) as acceptor (GO:0016652)	1	0	.02	-	< 0.01	1.00E00	1.00E00
oxidoreductase activity, acting on NAD(P)H (GO:0016651)	90	3	1.43	+	2.10	1.78E-01	1.00E00
calcium-independent protein kinase C activity (GO:0004699)	2	0	.03	-	< 0.01	1.00E00	1.00E00
calcium-dependent protein kinase C activity (GO:0004698)	16	1	.25	+	3.94	2.35E-01	1.00E00
protein kinase C activity (GO:0004697)	17	1	.27	+	3.70	2.47E-01	1.00E00
eukaryotic translation initiation factor 2alpha kinase activity (GO:0004694)	4	0	.06	-	< 0.01	1.00E00	1.00E00
cyclin-dependent protein serine/threonine kinase activity (GO:0004693)	29	0	.46	-	< 0.01	1.00E00	1.00E00
cGMP-dependent protein kinase activity (GO:0004692)	2	0	.03	-	< 0.01	1.00E00	1.00E00
cAMP-dependent protein kinase activity (GO:0004691)	8	0	.13	-	< 0.01	1.00E00	1.00E00
cyclic nucleotide-dependent protein kinase activity (GO:0004690)	10	0	.16	-	< 0.01	1.00E00	1.00E00
delta4-3-oxosteroid 5beta-reductase activity (GO:0047787)	2	0	.03	-	< 0.01	1.00E00	1.00E00
oxidoreductase activity, acting on the CH-NH group of donors, quinone or similar compound as acceptor (GO:0016649)	2	0	.03	-	< 0.01	1.00E00	1.00E00
oxidoreductase activity, acting on the CH-NH group of donors, oxygen as acceptor (GO:0016647)	4	0	.06	-	< 0.01	1.00E00	1.00E00
oxidoreductase activity, acting on the CH-NH group of donors, NAD or NADP as acceptor (GO:0016646)	18	1	.29	+	3.50	2.59E-01	1.00E00
corticosterone 18-monooxygenase activity (GO:0047783)	2	0	.03	-	< 0.01	1.00E00	1.00E00
oxidoreductase activity, acting on the CH-NH group of donors (GO:0016645)	28	1	.44	+	2.25	3.67E-01	1.00E00
oxidoreductase activity, acting on the CH-NH2 group of donors, oxygen as acceptor (GO:0016641)	16	1	.25	+	3.94	2.35E-01	1.00E00
phosphorylase kinase activity (GO:0004689)	4	0	.06	-	< 0.01	1.00E00	1.00E00
myosin light chain kinase activity (GO:0004687)	4	0	.06	-	< 0.01	1.00E00	1.00E00
FAD-AMP lyase (cyclizing) activity (GO:0034012)	1	0	.02	-	< 0.01	1.00E00	1.00E00
elongation factor-2 kinase activity (GO:0004686)	1	0	.02	-	< 0.01	1.00E00	1.00E00
calmodulin-dependent protein kinase activity (GO:0004683)	27	0	.43	-	< 0.01	1.00E00	1.00E00
(S)-citramalyl-CoA lyase activity (GO:0047777)	1	0	.02	-	< 0.01	1.00E00	1.00E00
oxidoreductase activity, acting on the CH-NH2 group of donors, NAD or NADP as acceptor (GO:0016639)	2	0	.03	-	< 0.01	1.00E00	1.00E00
3-hydroxyacyl-CoA dehydratase activity (GO:0018812)	5	0	.08	-	< 0.01	1.00E00	1.00E00
oxidoreductase activity, acting on the CH-CH group of donors, quinone or related compound as acceptor (GO:0016635)	3	0	.05	-	< 0.01	1.00E00	1.00E00
oxidoreductase activity, acting on the CH-CH group of donors, oxygen as acceptor (GO:0016634)	10	0	.16	-	< 0.01	1.00E00	1.00E00
AMP-activated protein kinase activity (GO:0004679)	8	0	.13	-	< 0.01	1.00E00	1.00E00
DNA-dependent protein kinase activity (GO:0004677)	3	0	.05	-	< 0.01	1.00E00	1.00E00
3-phosphoinositide-dependent protein kinase activity (GO:0004676)	1	0	.02	-	< 0.01	1.00E00	1.00E00
transmembrane receptor protein serine/threonine kinase activity (GO:0004675)	19	0	.30	-	< 0.01	1.00E00	1.00E00
protein serine/threonine kinase activity (GO:0004674)	434	4	6.89	-	.58	3.33E-01	1.00E00
protein kinase activity (GO:0004672)	582	9	9.24	-	.97	1.00E00	1.00E00
protein C-terminal S-isoprenylcysteine carboxyl O-methyltransferase activity (GO:0004671)	1	0	.02	-	< 0.01	1.00E00	1.00E00
oxidoreductase activity, acting on the CH-CH group of donors (GO:0016627)	59	2	.94	+	2.13	2.47E-01	1.00E00
oxidoreductase activity, acting on the aldehyde or oxo group of donors, disulfide as acceptor (GO:0016624)	8	0	.13	-	< 0.01	1.00E00	1.00E00
oxidoreductase activity, acting on the aldehyde or oxo group of donors, oxygen as acceptor (GO:0016623)	3	0	.05	-	< 0.01	1.00E00	1.00E00
butyrate-CoA ligase activity (GO:0047760)	10	0	.16	-	< 0.01	1.00E00	1.00E00
prostaglandin-D synthase activity (GO:0004667)	3	0	.05	-	< 0.01	1.00E00	1.00E00
prostaglandin-endoperoxide synthase activity (GO:0004666)	2	0	.03	-	< 0.01	1.00E00	1.00E00
Rab geranylgeranyltransferase activity (GO:0004663)	4	0	.06	-	< 0.01	1.00E00	1.00E00
CAAX-protein geranylgeranyltransferase activity (GO:0004662)	2	0	.03	-	< 0.01	1.00E00	1.00E00
protein geranylgeranyltransferase activity (GO:0004661)	5	0	.08	-	< 0.01	1.00E00	1.00E00
protein farnesyltransferase activity (GO:0004660)	2	0	.03	-	< 0.01	1.00E00	1.00E00
chondroitin-glucuronate 5-epimerase activity (GO:0047757)	2	0	.03	-	< 0.01	1.00E00	1.00E00
chondroitin 4-sulfotransferase activity (GO:0047756)	4	0	.06	-	< 0.01	1.00E00	1.00E00
hydroxypyruvate reductase activity (GO:0016618)	1	0	.02	-	< 0.01	1.00E00	1.00E00
RNA 5'-methyltransferase activity (GO:1990276)	1	0	.02	-	< 0.01	1.00E00	1.00E00
malate dehydrogenase activity (GO:0016615)	8	0	.13	-	< 0.01	1.00E00	1.00E00
preribosome binding (GO:1990275)	1	0	.02	-	< 0.01	1.00E00	1.00E00
cholestenone 5-alpha-reductase activity (GO:0047751)	3	0	.05	-	< 0.01	1.00E00	1.00E00
cholestenol delta-isomerase activity (GO:0047750)	2	0	.03	-	< 0.01	1.00E00	1.00E00
anti-Mullerian hormone receptor activity (GO:1990272)	1	0	.02	-	< 0.01	1.00E00	1.00E00
HLH domain binding (GO:0043398)	4	0	.06	-	< 0.01	1.00E00	1.00E00
2-alkenal reductase (NADP+) activity (GO:0035798)	1	0	.02	-	< 0.01	1.00E00	1.00E00
prenyltransferase activity (GO:0004659)	17	1	.27	+	3.70	2.47E-01	1.00E00
propionyl-CoA carboxylase activity (GO:0004658)	2	0	.03	-	< 0.01	1.00E00	1.00E00
proline dehydrogenase activity (GO:0004657)	2	0	.03	-	< 0.01	1.00E00	1.00E00
procollagen-proline 4-dioxygenase activity (GO:0004656)	5	0	.08	-	< 0.01	1.00E00	1.00E00
polyribonucleotide nucleotidyltransferase activity (GO:0004654)	1	0	.02	-	< 0.01	1.00E00	1.00E00
polypeptide N-acetylgalactosaminyltransferase activity (GO:0004653)	19	0	.30	-	< 0.01	1.00E00	1.00E00
polynucleotide adenylyltransferase activity (GO:0004652)	13	0	.21	-	< 0.01	1.00E00	1.00E00
polynucleotide 5'-phosphatase activity (GO:0004651)	2	0	.03	-	< 0.01	1.00E00	1.00E00
cholestanetriol 26-monooxygenase activity (GO:0047749)	1	0	.02	-	< 0.01	1.00E00	1.00E00
cholestanetetraol 26-dehydrogenase activity (GO:0047748)	1	0	.02	-	< 0.01	1.00E00	1.00E00
RNA polymerase II C-terminal domain phosphoserine binding (GO:1990269)	5	0	.08	-	< 0.01	1.00E00	1.00E00
growth hormone-releasing hormone activity (GO:0016608)	2	0	.03	-	< 0.01	1.00E00	1.00E00
endopolyphosphatase activity (GO:0000298)	5	0	.08	-	< 0.01	1.00E00	1.00E00
chlordecone reductase activity (GO:0047743)	1	0	.02	-	< 0.01	1.00E00	1.00E00
adenine nucleotide transmembrane transporter activity (GO:0000295)	17	1	.27	+	3.70	2.47E-01	1.00E00
ferric-chelate reductase activity (GO:0000293)	4	0	.06	-	< 0.01	1.00E00	1.00E00
poly(ADP-ribose) glycohydrolase activity (GO:0004649)	2	0	.03	-	< 0.01	1.00E00	1.00E00
phosphoserine phosphatase activity (GO:0004647)	4	0	.06	-	< 0.01	1.00E00	1.00E00
phosphoribosylglycinamide formyltransferase activity (GO:0004644)	1	0	.02	-	< 0.01	1.00E00	1.00E00
phosphoribosylaminoimidazolecarboxamide formyltransferase activity (GO:0004643)	1	0	.02	-	< 0.01	1.00E00	1.00E00
phosphoribosylformylglycinamidine synthase activity (GO:0004642)	1	0	.02	-	< 0.01	1.00E00	1.00E00
phosphoribosylformylglycinamidine cyclo-ligase activity (GO:0004641)	1	0	.02	-	< 0.01	1.00E00	1.00E00
histone-glutamine methyltransferase activity (GO:1990259)	2	0	.03	-	< 0.01	1.00E00	1.00E00
CDP-glycerol diphosphatase activity (GO:0047734)	1	0	.02	-	< 0.01	1.00E00	1.00E00
1-phosphatidylinositol-3-phosphate 5-kinase activity (GO:0000285)	3	0	.05	-	< 0.01	1.00E00	1.00E00
carnosine synthase activity (GO:0047730)	1	0	.02	-	< 0.01	1.00E00	1.00E00
geranylgeranyl reductase activity (GO:0045550)	2	0	.03	-	< 0.01	1.00E00	1.00E00
phosphoribosylaminoimidazolesuccinocarboxamide synthase activity (GO:0004639)	1	0	.02	-	< 0.01	1.00E00	1.00E00
phosphoribosylaminoimidazole carboxylase activity (GO:0004638)	1	0	.02	-	< 0.01	1.00E00	1.00E00
phosphoribosylamine-glycine ligase activity (GO:0004637)	1	0	.02	-	< 0.01	1.00E00	1.00E00
phosphopyruvate hydratase activity (GO:0004634)	4	0	.06	-	< 0.01	1.00E00	1.00E00
phosphopantothenoylcysteine decarboxylase activity (GO:0004633)	1	0	.02	-	< 0.01	1.00E00	1.00E00
phosphopantothenate--cysteine ligase activity (GO:0004632)	1	0	.02	-	< 0.01	1.00E00	1.00E00
RNA strand annealing activity (GO:0033592)	5	0	.08	-	< 0.01	1.00E00	1.00E00
iron-cytochrome-c reductase activity (GO:0047726)	1	0	.02	-	< 0.01	1.00E00	1.00E00
N6-methyladenosine-containing RNA binding (GO:1990247)	7	0	.11	-	< 0.01	1.00E00	1.00E00
histone kinase activity (H2A-T120 specific) (GO:1990244)	1	0	.02	-	< 0.01	1.00E00	1.00E00
dehydrodolichyl diphosphate synthase activity (GO:0045547)	2	0	.03	-	< 0.01	1.00E00	1.00E00
syndecan binding (GO:0045545)	6	0	.10	-	< 0.01	1.00E00	1.00E00
phospholipase C activity (GO:0004629)	28	0	.44	-	< 0.01	1.00E00	1.00E00
phospholipase A2 activity (GO:0004623)	33	0	.52	-	< 0.01	1.00E00	1.00E00
lysophospholipase activity (GO:0004622)	25	0	.40	-	< 0.01	1.00E00	1.00E00
glycosylphosphatidylinositol phospholipase D activity (GO:0004621)	1	0	.02	-	< 0.01	1.00E00	1.00E00
phospholipase activity (GO:0004620)	107	2	1.70	+	1.18	6.89E-01	1.00E00
indanol dehydrogenase activity (GO:0047718)	3	0	.05	-	< 0.01	1.00E00	1.00E00
steroid hormone binding (GO:1990239)	6	0	.10	-	< 0.01	1.00E00	1.00E00
double-stranded DNA endodeoxyribonuclease activity (GO:1990238)	1	0	.02	-	< 0.01	1.00E00	1.00E00
galactolipase activity (GO:0047714)	1	0	.02	-	< 0.01	1.00E00	1.00E00
peroxisome targeting sequence binding (GO:0000268)	6	0	.10	-	< 0.01	1.00E00	1.00E00
chemokine (C-C motif) ligand 21 binding (GO:0035758)	1	0	.02	-	< 0.01	1.00E00	1.00E00
chemokine (C-C motif) ligand 19 binding (GO:0035757)	1	0	.02	-	< 0.01	1.00E00	1.00E00
phosphoglycerate mutase activity (GO:0004619)	4	0	.06	-	< 0.01	1.00E00	1.00E00
phosphoglycerate kinase activity (GO:0004618)	2	0	.03	-	< 0.01	1.00E00	1.00E00
cardiolipin hydrolase activity (GO:0035755)	1	0	.02	-	< 0.01	1.00E00	1.00E00
phosphoglycerate dehydrogenase activity (GO:0004617)	1	0	.02	-	< 0.01	1.00E00	1.00E00
phosphogluconate dehydrogenase (decarboxylating) activity (GO:0004616)	1	0	.02	-	< 0.01	1.00E00	1.00E00
phosphomannomutase activity (GO:0004615)	2	0	.03	-	< 0.01	1.00E00	1.00E00
phosphoglucomutase activity (GO:0004614)	3	0	.05	-	< 0.01	1.00E00	1.00E00
phosphoacetylglucosamine mutase activity (GO:0004610)	1	0	.02	-	< 0.01	1.00E00	1.00E00
biotinidase activity (GO:0047708)	2	0	.03	-	< 0.01	1.00E00	1.00E00
bile-salt sulfotransferase activity (GO:0047704)	2	0	.03	-	< 0.01	1.00E00	1.00E00
histone methyltransferase binding (GO:1990226)	11	0	.17	-	< 0.01	1.00E00	1.00E00
C-4 methylsterol oxidase activity (GO:0000254)	3	0	.05	-	< 0.01	1.00E00	1.00E00
3-keto sterol reductase activity (GO:0000253)	5	0	.08	-	< 0.01	1.00E00	1.00E00
C-3 sterol dehydrogenase (C-4 sterol decarboxylase) activity (GO:0000252)	1	0	.02	-	< 0.01	1.00E00	1.00E00
interleukin-27 receptor binding (GO:0045523)	1	0	.02	-	< 0.01	1.00E00	1.00E00
lanosterol synthase activity (GO:0000250)	1	0	.02	-	< 0.01	1.00E00	1.00E00
phosphatidylethanolamine N-methyltransferase activity (GO:0004608)	1	0	.02	-	< 0.01	1.00E00	1.00E00
phosphatidylcholine-sterol O-acyltransferase activity (GO:0004607)	1	0	.02	-	< 0.01	1.00E00	1.00E00
phosphatidate cytidylyltransferase activity (GO:0004605)	3	0	.05	-	< 0.01	1.00E00	1.00E00
phenylethanolamine N-methyltransferase activity (GO:0004603)	1	0	.02	-	< 0.01	1.00E00	1.00E00
folate reductase activity (GO:0033560)	1	0	.02	-	< 0.01	1.00E00	1.00E00
protein tag (GO:0031386)	14	0	.22	-	< 0.01	1.00E00	1.00E00
C-5 sterol desaturase activity (GO:0000248)	2	0	.03	-	< 0.01	1.00E00	1.00E00
C-8 sterol isomerase activity (GO:0000247)	1	0	.02	-	< 0.01	1.00E00	1.00E00
interleukin-23 receptor binding (GO:0045519)	2	0	.03	-	< 0.01	1.00E00	1.00E00
delta24(24-1) sterol reductase activity (GO:0000246)	1	0	.02	-	< 0.01	1.00E00	1.00E00
interleukin-22 receptor binding (GO:0045518)	2	0	.03	-	< 0.01	1.00E00	1.00E00
interleukin-20 receptor binding (GO:0045517)	1	0	.02	-	< 0.01	1.00E00	1.00E00
interleukin-18 receptor binding (GO:0045515)	1	0	.02	-	< 0.01	1.00E00	1.00E00
interleukin-27 binding (GO:0045513)	1	0	.02	-	< 0.01	1.00E00	1.00E00
CDP-diacylglycerol-phosphatidylglycerol phosphatidyltransferase activity (GO:0043337)	1	0	.02	-	< 0.01	1.00E00	1.00E00
2-octaprenyl-6-methoxy-1,4-benzoquinone methylase activity (GO:0043333)	1	0	.02	-	< 0.01	1.00E00	1.00E00
protein deacetylase activity (GO:0033558)	23	0	.37	-	< 0.01	1.00E00	1.00E00
dinitrosyl-iron complex binding (GO:0035731)	1	0	.02	-	< 0.01	1.00E00	1.00E00
S-nitrosoglutathione binding (GO:0035730)	1	0	.02	-	< 0.01	1.00E00	1.00E00
interleukin-27 receptor activity (GO:0045509)	2	0	.03	-	< 0.01	1.00E00	1.00E00
eukaryotic initiation factor 4G binding (GO:0031370)	1	0	.02	-	< 0.01	1.00E00	1.00E00
dynein heavy chain binding (GO:0045504)	13	0	.21	-	< 0.01	1.00E00	1.00E00
dynein light chain binding (GO:0045503)	10	0	.16	-	< 0.01	1.00E00	1.00E00
phosphatidylinositol-3,4-bisphosphate binding (GO:0043325)	29	1	.46	+	2.17	3.77E-01	1.00E00
lysophosphatidic acid binding (GO:0035727)	8	0	.13	-	< 0.01	1.00E00	1.00E00
MAP kinase phosphatase activity (GO:0033549)	15	0	.24	-	< 0.01	1.00E00	1.00E00
translation initiation factor binding (GO:0031369)	34	0	.54	-	< 0.01	1.00E00	1.00E00
N-acetylglucosaminylphosphatidylinositol deacetylase activity (GO:0000225)	1	0	.02	-	< 0.01	1.00E00	1.00E00
peptide-N4-(N-acetyl-beta-glucosaminyl)asparagine amidase activity (GO:0000224)	1	0	.02	-	< 0.01	1.00E00	1.00E00
macrophage migration inhibitory factor binding (GO:0035718)	2	0	.03	-	< 0.01	1.00E00	1.00E00
chemokine (C-C motif) ligand 7 binding (GO:0035717)	2	0	.03	-	< 0.01	1.00E00	1.00E00
chemokine (C-C motif) ligand 12 binding (GO:0035716)	1	0	.02	-	< 0.01	1.00E00	1.00E00
chemokine (C-C motif) ligand 2 binding (GO:0035715)	1	0	.02	-	< 0.01	1.00E00	1.00E00
delta-catenin binding (GO:0070097)	9	0	.14	-	< 0.01	1.00E00	1.00E00
DNA secondary structure binding (GO:0000217)	37	0	.59	-	< 0.01	1.00E00	1.00E00
tRNA 2'-phosphotransferase activity (GO:0000215)	2	0	.03	-	< 0.01	1.00E00	1.00E00
tRNA-intron endonuclease activity (GO:0000213)	2	0	.03	-	< 0.01	1.00E00	1.00E00
NAD+ diphosphatase activity (GO:0000210)	3	0	.05	-	< 0.01	1.00E00	1.00E00
very-long-chain-acyl-CoA dehydrogenase activity (GO:0017099)	4	0	.06	-	< 0.01	1.00E00	1.00E00
chloride-activated potassium channel activity (GO:0070089)	1	0	.02	-	< 0.01	1.00E00	1.00E00
sulfonylurea receptor binding (GO:0017098)	2	0	.03	-	< 0.01	1.00E00	1.00E00
iodotyrosine deiodinase activity (GO:0140616)	1	0	.02	-	< 0.01	1.00E00	1.00E00
chromo shadow domain binding (GO:0070087)	6	0	.10	-	< 0.01	1.00E00	1.00E00
acetylserotonin O-methyltransferase activity (GO:0017096)	1	0	.02	-	< 0.01	1.00E00	1.00E00
heparan sulfate 6-O-sulfotransferase activity (GO:0017095)	3	0	.05	-	< 0.01	1.00E00	1.00E00
P-type manganese transporter activity (GO:0140613)	2	0	.03	-	< 0.01	1.00E00	1.00E00
titin Z domain binding (GO:0070080)	2	0	.03	-	< 0.01	1.00E00	1.00E00
glycolipid transfer activity (GO:0017089)	3	0	.05	-	< 0.01	1.00E00	1.00E00
ATP hydrolysis activity (GO:0140603)	43	0	.68	-	< 0.01	1.00E00	1.00E00
4-galactosyl-N-acetylglucosaminide 3-alpha-L-fucosyltransferase activity (GO:0017083)	6	0	.10	-	< 0.01	1.00E00	1.00E00
chloride channel regulator activity (GO:0017081)	16	0	.25	-	< 0.01	1.00E00	1.00E00
sodium channel regulator activity (GO:0017080)	40	2	.64	+	3.15	1.40E-01	1.00E00
raffinose alpha-galactosidase activity (GO:0052692)	1	0	.02	-	< 0.01	1.00E00	1.00E00
syntaxin-1 binding (GO:0017075)	26	0	.41	-	< 0.01	1.00E00	1.00E00
proline-rich region binding (GO:0070064)	18	0	.29	-	< 0.01	1.00E00	1.00E00
RNA polymerase binding (GO:0070063)	61	1	.97	+	1.03	6.24E-01	1.00E00
U6 snRNA binding (GO:0017070)	14	0	.22	-	< 0.01	1.00E00	1.00E00
snRNA binding (GO:0017069)	47	1	.75	+	1.34	5.31E-01	1.00E00
single-strand selective uracil DNA N-glycosylase activity (GO:0017065)	1	0	.02	-	< 0.01	1.00E00	1.00E00
fatty acid amide hydrolase activity (GO:0017064)	4	0	.06	-	< 0.01	1.00E00	1.00E00
thrombospondin receptor activity (GO:0070053)	4	0	.06	-	< 0.01	1.00E00	1.00E00
collagen V binding (GO:0070052)	2	0	.03	-	< 0.01	1.00E00	1.00E00
S-methyl-5-thioadenosine phosphorylase activity (GO:0017061)	2	0	.03	-	< 0.01	1.00E00	1.00E00
fibrinogen binding (GO:0070051)	5	0	.08	-	< 0.01	1.00E00	1.00E00
3-galactosyl-N-acetylglucosaminide 4-alpha-L-fucosyltransferase activity (GO:0017060)	2	0	.03	-	< 0.01	1.00E00	1.00E00
deaminase activity (GO:0019239)	32	0	.51	-	< 0.01	1.00E00	1.00E00
cyclohydrolase activity (GO:0019238)	5	0	.08	-	< 0.01	1.00E00	1.00E00
centromeric DNA binding (GO:0019237)	6	0	.10	-	< 0.01	1.00E00	1.00E00
alkylthioltransferase activity (GO:0050497)	2	0	.03	-	< 0.01	1.00E00	1.00E00
6-phosphogluconolactonase activity (GO:0017057)	2	0	.03	-	< 0.01	1.00E00	1.00E00
structural constituent of nuclear pore (GO:0017056)	28	0	.44	-	< 0.01	1.00E00	1.00E00
rRNA (uridine-N3-)-methyltransferase activity (GO:0070042)	1	0	.02	-	< 0.01	1.00E00	1.00E00
D-erythro-sphingosine kinase activity (GO:0017050)	2	0	.03	-	< 0.01	1.00E00	1.00E00
retinoic acid binding (GO:0001972)	20	0	.32	-	< 0.01	1.00E00	1.00E00
tRNA (cytosine-2'-O-)-methyltransferase activity (GO:0052666)	1	0	.02	-	< 0.01	1.00E00	1.00E00
GTPase activator activity (GO:0005096)	466	7	7.40	-	.95	1.00E00	1.00E00
GTPase inhibitor activity (GO:0005095)	14	0	.22	-	< 0.01	1.00E00	1.00E00
Rab GDP-dissociation inhibitor activity (GO:0005093)	2	0	.03	-	< 0.01	1.00E00	1.00E00
GDP-dissociation inhibitor activity (GO:0005092)	16	1	.25	+	3.94	2.35E-01	1.00E00
intramolecular transferase activity, transferring hydroxy groups (GO:0050486)	2	0	.03	-	< 0.01	1.00E00	1.00E00
IMP 5'-nucleotidase activity (GO:0050483)	3	0	.05	-	< 0.01	1.00E00	1.00E00
amide transmembrane transporter activity (GO:0042887)	37	0	.59	-	< 0.01	1.00E00	1.00E00
rRNA (guanosine-2'-O-)-methyltransferase activity (GO:0070039)	2	0	.03	-	< 0.01	1.00E00	1.00E00
activin binding (GO:0048185)	15	0	.24	-	< 0.01	1.00E00	1.00E00
imidazolonepropionase activity (GO:0050480)	1	0	.02	-	< 0.01	1.00E00	1.00E00
rRNA (pseudouridine) methyltransferase activity (GO:0070037)	1	0	.02	-	< 0.01	1.00E00	1.00E00
peptide hormone binding (GO:0017046)	52	0	.83	-	< 0.01	1.00E00	1.00E00
corticotropin-releasing hormone activity (GO:0017045)	1	0	.02	-	< 0.01	1.00E00	1.00E00
telomerase RNA binding (GO:0070034)	22	0	.35	-	< 0.01	1.00E00	1.00E00
glycosylceramidase activity (GO:0017042)	2	0	.03	-	< 0.01	1.00E00	1.00E00
galactosylgalactosylglucosylceramidase activity (GO:0017041)	1	0	.02	-	< 0.01	1.00E00	1.00E00
N-acylsphingosine amidohydrolase activity (GO:0017040)	7	0	.11	-	< 0.01	1.00E00	1.00E00
G-protein alpha-subunit binding (GO:0001965)	26	1	.41	+	2.42	3.47E-01	1.00E00
inositol-1,3,4,5-tetrakisphosphate 5-phosphatase activity (GO:0052659)	6	0	.10	-	< 0.01	1.00E00	1.00E00
inositol-1,4,5-trisphosphate 5-phosphatase activity (GO:0052658)	7	0	.11	-	< 0.01	1.00E00	1.00E00
guanine phosphoribosyltransferase activity (GO:0052657)	1	0	.02	-	< 0.01	1.00E00	1.00E00
L-isoleucine transaminase activity (GO:0052656)	2	0	.03	-	< 0.01	1.00E00	1.00E00
L-valine transaminase activity (GO:0052655)	2	0	.03	-	< 0.01	1.00E00	1.00E00
L-leucine transaminase activity (GO:0052654)	2	0	.03	-	< 0.01	1.00E00	1.00E00
guanyl-nucleotide exchange factor activity (GO:0005085)	224	6	3.56	+	1.69	1.79E-01	1.00E00
glyceryl-ether monooxygenase activity (GO:0050479)	1	0	.02	-	< 0.01	1.00E00	1.00E00
NADP-retinol dehydrogenase activity (GO:0052650)	13	0	.21	-	< 0.01	1.00E00	1.00E00
protein kinase C binding (GO:0005080)	55	2	.87	+	2.29	2.24E-01	1.00E00
deacetylase activity (GO:0019213)	38	0	.60	-	< 0.01	1.00E00	1.00E00
arachidonate 15-lipoxygenase activity (GO:0050473)	3	0	.05	-	< 0.01	1.00E00	1.00E00
phosphatase inhibitor activity (GO:0019212)	52	0	.83	-	< 0.01	1.00E00	1.00E00
phosphatase activator activity (GO:0019211)	24	1	.38	+	2.62	3.26E-01	1.00E00
kinase inhibitor activity (GO:0019210)	74	2	1.17	+	1.70	3.34E-01	1.00E00
nitric oxide binding (GO:0070026)	3	0	.05	-	< 0.01	1.00E00	1.00E00
carbon monoxide binding (GO:0070025)	1	0	.02	-	< 0.01	1.00E00	1.00E00
decanoate-CoA ligase activity (GO:0102391)	4	0	.06	-	< 0.01	1.00E00	1.00E00
mycophenolic acid acyl-glucuronide esterase activity (GO:0102390)	1	0	.02	-	< 0.01	1.00E00	1.00E00
MAP-kinase scaffold activity (GO:0005078)	11	0	.17	-	< 0.01	1.00E00	1.00E00
kinase activator activity (GO:0019209)	101	2	1.60	+	1.25	6.77E-01	1.00E00
phosphatase regulator activity (GO:0019208)	76	1	1.21	-	.83	1.00E00	1.00E00
kinase regulator activity (GO:0019207)	233	5	3.70	+	1.35	4.27E-01	1.00E00
nucleoside kinase activity (GO:0019206)	9	0	.14	-	< 0.01	1.00E00	1.00E00
nucleobase-containing compound kinase activity (GO:0019205)	42	1	.67	+	1.50	4.92E-01	1.00E00
polyprenol reductase activity (GO:0102389)	1	0	.02	-	< 0.01	1.00E00	1.00E00
amino acid kinase activity (GO:0019202)	2	0	.03	-	< 0.01	1.00E00	1.00E00
N-acetylneuraminate synthase activity (GO:0050462)	1	0	.02	-	< 0.01	1.00E00	1.00E00
carbohydrate kinase activity (GO:0019200)	22	1	.35	+	2.86	3.04E-01	1.00E00
armadillo repeat domain binding (GO:0070016)	10	0	.16	-	< 0.01	1.00E00	1.00E00
TBP-class protein binding (GO:0017025)	25	0	.40	-	< 0.01	1.00E00	1.00E00
myosin I binding (GO:0017024)	1	0	.02	-	< 0.01	1.00E00	1.00E00
myosin binding (GO:0017022)	74	1	1.17	-	.85	1.00E00	1.00E00
oligopeptidase activity (GO:0070012)	3	0	.05	-	< 0.01	1.00E00	1.00E00
myosin phosphatase regulator activity (GO:0017020)	3	0	.05	-	< 0.01	1.00E00	1.00E00
transmembrane receptor protein tyrosine kinase adaptor activity (GO:0005068)	13	0	.21	-	< 0.01	1.00E00	1.00E00
lipoprotein lipase activator activity (GO:0060230)	3	0	.05	-	< 0.01	1.00E00	1.00E00
ethanolamine-phosphate phospho-lyase activity (GO:0050459)	1	0	.02	-	< 0.01	1.00E00	1.00E00
UDP-N-acetylgalactosamine diphosphorylase activity (GO:0052630)	1	0	.02	-	< 0.01	1.00E00	1.00E00
tau protein binding (GO:0048156)	45	1	.71	+	1.40	5.16E-01	1.00E00
serine-type aminopeptidase activity (GO:0070009)	1	0	.02	-	< 0.01	1.00E00	1.00E00
myosin phosphatase activity (GO:0017018)	4	0	.06	-	< 0.01	1.00E00	1.00E00
MAP kinase tyrosine/serine/threonine phosphatase activity (GO:0017017)	13	0	.21	-	< 0.01	1.00E00	1.00E00
cysteine-type exopeptidase activity (GO:0070004)	5	0	.08	-	< 0.01	1.00E00	1.00E00
threonine-type peptidase activity (GO:0070003)	25	0	.40	-	< 0.01	1.00E00	1.00E00
glutamic-type peptidase activity (GO:0070002)	1	0	.02	-	< 0.01	1.00E00	1.00E00
aspartic-type peptidase activity (GO:0070001)	40	2	.64	+	3.15	1.40E-01	1.00E00
lipase activator activity (GO:0060229)	18	1	.29	+	3.50	2.59E-01	1.00E00
calcium-dependent ATPase activity (GO:0030899)	2	0	.03	-	< 0.01	1.00E00	1.00E00
phosphatidylinositol-3,5-bisphosphate 3-phosphatase activity (GO:0052629)	11	0	.17	-	< 0.01	1.00E00	1.00E00
laminin receptor activity (GO:0005055)	2	0	.03	-	< 0.01	1.00E00	1.00E00
peroxisome matrix targeting signal-2 binding (GO:0005053)	1	0	.02	-	< 0.01	1.00E00	1.00E00
peroxisome matrix targeting signal-1 binding (GO:0005052)	2	0	.03	-	< 0.01	1.00E00	1.00E00
3'-tyrosyl-DNA phosphodiesterase activity (GO:0017005)	1	0	.02	-	< 0.01	1.00E00	1.00E00
activin-activated receptor activity (GO:0017002)	10	0	.16	-	< 0.01	1.00E00	1.00E00
signal sequence binding (GO:0005048)	50	0	.79	-	< 0.01	1.00E00	1.00E00
13-lipoxin reductase activity (GO:0036185)	1	0	.02	-	< 0.01	1.00E00	1.00E00
signal recognition particle binding (GO:0005047)	7	0	.11	-	< 0.01	1.00E00	1.00E00
KDEL sequence binding (GO:0005046)	3	0	.05	-	< 0.01	1.00E00	1.00E00
exogenous lipid antigen binding (GO:0030884)	5	0	.08	-	< 0.01	1.00E00	1.00E00
endogenous lipid antigen binding (GO:0030883)	5	0	.08	-	< 0.01	1.00E00	1.00E00
scavenger receptor activity (GO:0005044)	47	1	.75	+	1.34	5.31E-01	1.00E00
lipid antigen binding (GO:0030882)	5	0	.08	-	< 0.01	1.00E00	1.00E00
netrin receptor activity involved in chemorepulsion (GO:0005043)	1	0	.02	-	< 0.01	1.00E00	1.00E00
beta-2-microglobulin binding (GO:0030881)	8	0	.13	-	< 0.01	1.00E00	1.00E00
netrin receptor activity (GO:0005042)	6	0	.10	-	< 0.01	1.00E00	1.00E00
low-density lipoprotein particle receptor activity (GO:0005041)	15	1	.24	+	4.20	2.23E-01	1.00E00
microfibril binding (GO:0050436)	4	0	.06	-	< 0.01	1.00E00	1.00E00
transforming growth factor beta binding (GO:0050431)	24	0	.38	-	< 0.01	1.00E00	1.00E00
BRE binding (GO:0042835)	2	0	.03	-	< 0.01	1.00E00	1.00E00
11-cis-retinol dehydrogenase activity (GO:0102354)	3	0	.05	-	< 0.01	1.00E00	1.00E00
peptidoglycan binding (GO:0042834)	18	0	.29	-	< 0.01	1.00E00	1.00E00
K6-linked polyubiquitin modification-dependent protein binding (GO:0071796)	2	0	.03	-	< 0.01	1.00E00	1.00E00
K11-linked polyubiquitin modification-dependent protein binding (GO:0071795)	1	0	.02	-	< 0.01	1.00E00	1.00E00
chemokine (C-C motif) ligand 5 binding (GO:0071791)	2	0	.03	-	< 0.01	1.00E00	1.00E00
farnesylated protein binding (GO:0001918)	1	0	.02	-	< 0.01	1.00E00	1.00E00
death receptor activity (GO:0005035)	13	0	.21	-	< 0.01	1.00E00	1.00E00
osmosensor activity (GO:0005034)	4	0	.06	-	< 0.01	1.00E00	1.00E00
calcium-dependent phospholipase C activity (GO:0050429)	2	0	.03	-	< 0.01	1.00E00	1.00E00
propane-1,3-diamine oxidase activity (GO:0052600)	1	0	.02	-	< 0.01	1.00E00	1.00E00
tumor necrosis factor-activated receptor activity (GO:0005031)	10	0	.16	-	< 0.01	1.00E00	1.00E00
neurotrophin receptor activity (GO:0005030)	4	0	.06	-	< 0.01	1.00E00	1.00E00
histone deacetylase binding (GO:0042826)	115	1	1.83	-	.55	1.00E00	1.00E00
nitrite reductase (NO-forming) activity (GO:0050421)	4	0	.06	-	< 0.01	1.00E00	1.00E00
3-hydroxy-lignoceroyl-CoA dehydratase activity (GO:0102345)	4	0	.06	-	< 0.01	1.00E00	1.00E00
3-hydroxy-behenoyl-CoA dehydratase activity (GO:0102344)	4	0	.06	-	< 0.01	1.00E00	1.00E00
3-hydroxy-arachidoyl-CoA dehydratase activity (GO:0102343)	4	0	.06	-	< 0.01	1.00E00	1.00E00
3-oxo-cerotoyl-CoA reductase activity (GO:0102342)	1	0	.02	-	< 0.01	1.00E00	1.00E00
3-oxo-lignoceroyl-CoA reductase activity (GO:0102341)	1	0	.02	-	< 0.01	1.00E00	1.00E00
3-oxo-behenoyl-CoA reductase activity (GO:0102340)	1	0	.02	-	< 0.01	1.00E00	1.00E00
transforming growth factor beta receptor activity, type II (GO:0005026)	1	0	.02	-	< 0.01	1.00E00	1.00E00
transforming growth factor beta receptor activity, type I (GO:0005025)	5	0	.08	-	< 0.01	1.00E00	1.00E00
transforming growth factor beta-activated receptor activity (GO:0005024)	12	0	.19	-	< 0.01	1.00E00	1.00E00
vascular endothelial growth factor-activated receptor activity (GO:0005021)	8	0	.13	-	< 0.01	1.00E00	1.00E00
stem cell factor receptor activity (GO:0005020)	1	0	.02	-	< 0.01	1.00E00	1.00E00
3-oxo-arachidoyl-CoA reductase activity (GO:0102339)	1	0	.02	-	< 0.01	1.00E00	1.00E00
3-oxo-lignoceronyl-CoA synthase activity (GO:0102338)	7	0	.11	-	< 0.01	1.00E00	1.00E00
3-oxo-cerotoyl-CoA synthase activity (GO:0102337)	7	0	.11	-	< 0.01	1.00E00	1.00E00
3-oxo-arachidoyl-CoA synthase activity (GO:0102336)	7	0	.11	-	< 0.01	1.00E00	1.00E00
Wnt-activated receptor activity (GO:0042813)	15	0	.24	-	< 0.01	1.00E00	1.00E00
platelet-derived growth factor beta-receptor activity (GO:0005019)	2	0	.03	-	< 0.01	1.00E00	1.00E00
platelet-derived growth factor alpha-receptor activity (GO:0005018)	1	0	.02	-	< 0.01	1.00E00	1.00E00
platelet-derived growth factor-activated receptor activity (GO:0005017)	3	0	.05	-	< 0.01	1.00E00	1.00E00
macrophage colony-stimulating factor receptor activity (GO:0005011)	2	0	.03	-	< 0.01	1.00E00	1.00E00
insulin-like growth factor-activated receptor activity (GO:0005010)	3	0	.05	-	< 0.01	1.00E00	1.00E00
[acetyl-CoA carboxylase] kinase activity (GO:0050405)	2	0	.03	-	< 0.01	1.00E00	1.00E00
vitamin D receptor binding (GO:0042809)	15	0	.24	-	< 0.01	1.00E00	1.00E00
fucose binding (GO:0042806)	5	0	.08	-	< 0.01	1.00E00	1.00E00
actinin binding (GO:0042805)	38	0	.60	-	< 0.01	1.00E00	1.00E00
calcium- and calmodulin-regulated 3',5'-cyclic-GMP phosphodiesterase activity (GO:0048101)	3	0	.05	-	< 0.01	1.00E00	1.00E00
1,8-cineole 2-exo-monooxygenase activity (GO:0102320)	1	0	.02	-	< 0.01	1.00E00	1.00E00
histone methyltransferase activity (H3-K4 specific) (GO:0042800)	17	1	.27	+	3.70	2.47E-01	1.00E00
acetylpyruvate hydrolase activity (GO:0018773)	1	0	.02	-	< 0.01	1.00E00	1.00E00
thienylcyclohexylpiperidine binding (GO:0016596)	1	0	.02	-	< 0.01	1.00E00	1.00E00
glutamate binding (GO:0016595)	11	0	.17	-	< 0.01	1.00E00	1.00E00
ribonuclease E activity (GO:0008995)	1	0	.02	-	< 0.01	1.00E00	1.00E00
insulin-activated receptor activity (GO:0005009)	3	0	.05	-	< 0.01	1.00E00	1.00E00
hepatocyte growth factor-activated receptor activity (GO:0005008)	1	0	.02	-	< 0.01	1.00E00	1.00E00
fibroblast growth factor-activated receptor activity (GO:0005007)	5	0	.08	-	< 0.01	1.00E00	1.00E00
epidermal growth factor-activated receptor activity (GO:0005006)	2	0	.03	-	< 0.01	1.00E00	1.00E00
kringle domain binding (GO:0036143)	1	0	.02	-	< 0.01	1.00E00	1.00E00
3-hydroxykynureninase activity (GO:0061981)	1	0	.02	-	< 0.01	1.00E00	1.00E00
transmembrane-ephrin receptor activity (GO:0005005)	17	1	.27	+	3.70	2.47E-01	1.00E00
regulatory RNA binding (GO:0061980)	43	1	.68	+	1.46	5.00E-01	1.00E00
GPI-linked ephrin receptor activity (GO:0005004)	7	0	.11	-	< 0.01	1.00E00	1.00E00
ephrin receptor activity (GO:0005003)	19	1	.30	+	3.31	2.70E-01	1.00E00
peptidyl-asparagine 3-dioxygenase activity (GO:0036140)	1	0	.02	-	< 0.01	1.00E00	1.00E00
transmembrane receptor protein tyrosine phosphatase activity (GO:0005001)	17	1	.27	+	3.70	2.47E-01	1.00E00
vasopressin receptor activity (GO:0005000)	7	0	.11	-	< 0.01	1.00E00	1.00E00
rRNA (adenine-N6-)-methyltransferase activity (GO:0008988)	3	0	.05	-	< 0.01	1.00E00	1.00E00
peptidyl-histidine dioxygenase activity (GO:0036139)	1	0	.02	-	< 0.01	1.00E00	1.00E00
kynurenine aminotransferase activity (GO:0036137)	4	0	.06	-	< 0.01	1.00E00	1.00E00
protein-glutamate O-methyltransferase activity (GO:0008983)	1	0	.02	-	< 0.01	1.00E00	1.00E00
12-hydroxyheptadecatrienoic acid synthase activity (GO:0036134)	3	0	.05	-	< 0.01	1.00E00	1.00E00
13-prostaglandin reductase activity (GO:0036132)	3	0	.05	-	< 0.01	1.00E00	1.00E00
prostaglandin D2 11-ketoreductase activity (GO:0036131)	1	0	.02	-	< 0.01	1.00E00	1.00E00
prostaglandin H2 endoperoxidase reductase activity (GO:0036130)	2	0	.03	-	< 0.01	1.00E00	1.00E00
phosphopentomutase activity (GO:0008973)	1	0	.02	-	< 0.01	1.00E00	1.00E00
phospholipase A1 activity (GO:0008970)	17	1	.27	+	3.70	2.47E-01	1.00E00
BMP binding (GO:0036122)	15	0	.24	-	< 0.01	1.00E00	1.00E00
double-stranded DNA helicase activity (GO:0036121)	3	0	.05	-	< 0.01	1.00E00	1.00E00
phosphoglycolate phosphatase activity (GO:0008967)	2	0	.03	-	< 0.01	1.00E00	1.00E00
mRNA (adenine-N1-)-methyltransferase activity (GO:0061953)	3	0	.05	-	< 0.01	1.00E00	1.00E00
phosphatidylglycerophosphatase activity (GO:0008962)	1	0	.02	-	< 0.01	1.00E00	1.00E00
S-formylglutathione hydrolase activity (GO:0018738)	1	0	.02	-	< 0.01	1.00E00	1.00E00
lipopeptide binding (GO:0071723)	10	0	.16	-	< 0.01	1.00E00	1.00E00
beta-adrenergic receptor kinase activity (GO:0047696)	4	0	.06	-	< 0.01	1.00E00	1.00E00
ATP diphosphatase activity (GO:0047693)	1	0	.02	-	< 0.01	1.00E00	1.00E00
aspartyltransferase activity (GO:0047690)	3	0	.05	-	< 0.01	1.00E00	1.00E00
peptidoglycan glycosyltransferase activity (GO:0008955)	1	0	.02	-	< 0.01	1.00E00	1.00E00
peroxisome membrane class-1 targeting sequence binding (GO:0036105)	1	0	.02	-	< 0.01	1.00E00	1.00E00
peptidylamidoglycolate lyase activity (GO:0004598)	1	0	.02	-	< 0.01	1.00E00	1.00E00
peptide alpha-N-acetyltransferase activity (GO:0004596)	11	0	.17	-	< 0.01	1.00E00	1.00E00
pantetheine-phosphate adenylyltransferase activity (GO:0004595)	1	0	.02	-	< 0.01	1.00E00	1.00E00
pantothenate kinase activity (GO:0004594)	4	0	.06	-	< 0.01	1.00E00	1.00E00
oxoglutarate dehydrogenase (succinyl-transferring) activity (GO:0004591)	3	0	.05	-	< 0.01	1.00E00	1.00E00
orotidine-5'-phosphate decarboxylase activity (GO:0004590)	1	0	.02	-	< 0.01	1.00E00	1.00E00
icosanoid transmembrane transporter activity (GO:0071714)	3	0	.05	-	< 0.01	1.00E00	1.00E00
amine sulfotransferase activity (GO:0047685)	1	0	.02	-	< 0.01	1.00E00	1.00E00
oxaloacetate decarboxylase activity (GO:0008948)	4	0	.06	-	< 0.01	1.00E00	1.00E00
oligonucleotidase activity (GO:0008946)	1	0	.02	-	< 0.01	1.00E00	1.00E00
nitric oxide dioxygenase activity (GO:0008941)	1	0	.02	-	< 0.01	1.00E00	1.00E00
nitrate reductase activity (GO:0008940)	3	0	.05	-	< 0.01	1.00E00	1.00E00
orotate phosphoribosyltransferase activity (GO:0004588)	1	0	.02	-	< 0.01	1.00E00	1.00E00
ornithine-oxo-acid transaminase activity (GO:0004587)	1	0	.02	-	< 0.01	1.00E00	1.00E00
ornithine decarboxylase activity (GO:0004586)	2	0	.03	-	< 0.01	1.00E00	1.00E00
ornithine carbamoyltransferase activity (GO:0004585)	1	0	.02	-	< 0.01	1.00E00	1.00E00
dolichyl-phosphate-glucose-glycolipid alpha-glucosyltransferase activity (GO:0004583)	2	0	.03	-	< 0.01	1.00E00	1.00E00
dolichyl-phosphate beta-D-mannosyltransferase activity (GO:0004582)	1	0	.02	-	< 0.01	1.00E00	1.00E00
dolichyl-phosphate beta-glucosyltransferase activity (GO:0004581)	1	0	.02	-	< 0.01	1.00E00	1.00E00
arachidonate 8(R)-lipoxygenase activity (GO:0047677)	1	0	.02	-	< 0.01	1.00E00	1.00E00
cyclin-dependent protein serine/threonine kinase regulator activity (GO:0016538)	50	0	.79	-	< 0.01	1.00E00	1.00E00
metalloendopeptidase activity involved in amyloid precursor protein catabolic process (GO:1902945)	4	0	.06	-	< 0.01	1.00E00	1.00E00
gamma-glutamylaminecyclotransferase activity (GO:0061929)	1	0	.02	-	< 0.01	1.00E00	1.00E00
glutathione specific gamma-glutamylcyclotransferase activity (GO:0061928)	2	0	.03	-	< 0.01	1.00E00	1.00E00
ferredoxin-NAD(P) reductase activity (GO:0008937)	1	0	.02	-	< 0.01	1.00E00	1.00E00
superoxide dismutase copper chaperone activity (GO:0016532)	2	0	.03	-	< 0.01	1.00E00	1.00E00
copper chaperone activity (GO:0016531)	6	0	.10	-	< 0.01	1.00E00	1.00E00
metallochaperone activity (GO:0016530)	8	0	.13	-	< 0.01	1.00E00	1.00E00
peptide-glutamate-N-acetyltransferase activity (GO:1990190)	2	0	.03	-	< 0.01	1.00E00	1.00E00
inositol monophosphate 1-phosphatase activity (GO:0008934)	3	0	.05	-	< 0.01	1.00E00	1.00E00
protein propionyltransferase activity (GO:0061920)	1	0	.02	-	< 0.01	1.00E00	1.00E00
dolichyl-diphosphooligosaccharide-protein glycotransferase activity (GO:0004579)	5	0	.08	-	< 0.01	1.00E00	1.00E00
chitobiosyldiphosphodolichol beta-mannosyltransferase activity (GO:0004578)	1	0	.02	-	< 0.01	1.00E00	1.00E00
N-acetylglucosaminyldiphosphodolichol N-acetylglucosaminyltransferase activity (GO:0004577)	1	0	.02	-	< 0.01	1.00E00	1.00E00
oligosaccharyl transferase activity (GO:0004576)	6	0	.10	-	< 0.01	1.00E00	1.00E00
sucrose alpha-glucosidase activity (GO:0004575)	1	0	.02	-	< 0.01	1.00E00	1.00E00
oligo-1,6-glucosidase activity (GO:0004574)	1	0	.02	-	< 0.01	1.00E00	1.00E00
mannosyl-oligosaccharide glucosidase activity (GO:0004573)	1	0	.02	-	< 0.01	1.00E00	1.00E00
mannosyl-oligosaccharide 1,2-alpha-mannosidase activity (GO:0004571)	7	1	.11	+	9.00	1.18E-01	1.00E00
phosphatidylinositol bisphosphate binding (GO:1902936)	106	0	1.68	-	< 0.01	4.18E-01	1.00E00
peptide-serine-N-acetyltransferase activity (GO:1990189)	3	0	.05	-	< 0.01	1.00E00	1.00E00
methylglyoxal synthase activity (GO:0008929)	1	0	.02	-	< 0.01	1.00E00	1.00E00
latrotoxin receptor activity (GO:0016524)	2	0	.03	-	< 0.01	1.00E00	1.00E00
amino-acid racemase activity (GO:0047661)	1	0	.02	-	< 0.01	1.00E00	1.00E00
pituitary adenylate cyclase activating polypeptide activity (GO:0016521)	1	0	.02	-	< 0.01	1.00E00	1.00E00
omega-6 fatty acid desaturase activity (GO:0045485)	1	0	.02	-	< 0.01	1.00E00	1.00E00
growth hormone-releasing hormone receptor activity (GO:0016520)	3	0	.05	-	< 0.01	1.00E00	1.00E00
glycoprotein endo-alpha-1,2-mannosidase activity (GO:0004569)	1	0	.02	-	< 0.01	1.00E00	1.00E00
chitinase activity (GO:0004568)	4	0	.06	-	< 0.01	1.00E00	1.00E00
beta-mannosidase activity (GO:0004567)	1	0	.02	-	< 0.01	1.00E00	1.00E00
beta-glucuronidase activity (GO:0004566)	5	0	.08	-	< 0.01	1.00E00	1.00E00
beta-galactosidase activity (GO:0004565)	5	0	.08	-	< 0.01	1.00E00	1.00E00
beta-fructofuranosidase activity (GO:0004564)	1	0	.02	-	< 0.01	1.00E00	1.00E00
beta-N-acetylhexosaminidase activity (GO:0004563)	5	0	.08	-	< 0.01	1.00E00	1.00E00
alpha-N-acetylglucosaminidase activity (GO:0004561)	1	0	.02	-	< 0.01	1.00E00	1.00E00
alpha-L-fucosidase activity (GO:0004560)	2	0	.03	-	< 0.01	1.00E00	1.00E00
alpha-amino-acid esterase activity (GO:0047658)	1	0	.02	-	< 0.01	1.00E00	1.00E00
gastric inhibitory peptide receptor activity (GO:0016519)	1	0	.02	-	< 0.01	1.00E00	1.00E00
interleukin-12 receptor activity (GO:0016517)	1	0	.02	-	< 0.01	1.00E00	1.00E00
EH domain binding (GO:1990175)	2	0	.03	-	< 0.01	1.00E00	1.00E00
phosphodiesterase decapping endonuclease activity (GO:1990174)	2	0	.03	-	< 0.01	1.00E00	1.00E00
glutathione binding (GO:0043295)	11	1	.17	+	5.73	1.72E-01	1.00E00
alpha-1,4-glucosidase activity (GO:0004558)	5	0	.08	-	< 0.01	1.00E00	1.00E00
alpha-galactosidase activity (GO:0004557)	2	0	.03	-	< 0.01	1.00E00	1.00E00
alpha-amylase activity (GO:0004556)	3	0	.05	-	< 0.01	1.00E00	1.00E00
alpha,alpha-trehalase activity (GO:0004555)	1	0	.02	-	< 0.01	1.00E00	1.00E00
hydrolase activity, hydrolyzing O-glycosyl compounds (GO:0004553)	95	2	1.51	+	1.33	6.65E-01	1.00E00
nucleotide diphosphatase activity (GO:0004551)	20	1	.32	+	3.15	2.82E-01	1.00E00
nucleoside diphosphate kinase activity (GO:0004550)	19	1	.30	+	3.31	2.70E-01	1.00E00
long-chain-3-hydroxyacyl-CoA dehydrogenase activity (GO:0016509)	3	0	.05	-	< 0.01	1.00E00	1.00E00
long-chain-enoyl-CoA hydratase activity (GO:0016508)	3	0	.05	-	< 0.01	1.00E00	1.00E00
peptidase activator activity involved in apoptotic process (GO:0016505)	21	1	.33	+	3.00	2.93E-01	1.00E00
single-strand break-containing DNA binding (GO:1990165)	1	0	.02	-	< 0.01	1.00E00	1.00E00
peptidase activator activity (GO:0016504)	44	2	.70	+	2.86	1.62E-01	1.00E00
pheromone receptor activity (GO:0016503)	6	0	.10	-	< 0.01	1.00E00	1.00E00
nucleotide receptor activity (GO:0016502)	21	0	.33	-	< 0.01	1.00E00	1.00E00
prostacyclin receptor activity (GO:0016501)	1	0	.02	-	< 0.01	1.00E00	1.00E00
mannose-phosphate guanylyltransferase activity (GO:0008905)	1	0	.02	-	< 0.01	1.00E00	1.00E00
protein-hormone receptor activity (GO:0016500)	18	0	.29	-	< 0.01	1.00E00	1.00E00
hydroxypyruvate isomerase activity (GO:0008903)	1	0	.02	-	< 0.01	1.00E00	1.00E00
P-type potassium:proton transporter activity (GO:0008900)	3	0	.05	-	< 0.01	1.00E00	1.00E00
tRNA-specific ribonuclease activity (GO:0004549)	14	0	.22	-	< 0.01	1.00E00	1.00E00
protein carrier activity (GO:0140597)	48	2	.76	+	2.62	1.84E-01	1.00E00
ribonuclease activity (GO:0004540)	119	0	1.89	-	< 0.01	2.69E-01	1.00E00
ADP-ribose diphosphatase activity (GO:0047631)	6	0	.10	-	< 0.01	1.00E00	1.00E00
rDNA binding (GO:0000182)	8	0	.13	-	< 0.01	1.00E00	1.00E00
phospholipase binding (GO:0043274)	22	1	.35	+	2.86	3.04E-01	1.00E00
CTPase activity (GO:0043273)	3	0	.05	-	< 0.01	1.00E00	1.00E00
deoxyribonuclease activity (GO:0004536)	59	1	.94	+	1.07	6.12E-01	1.00E00
oligopeptide transmembrane transporter activity (GO:0035673)	11	0	.17	-	< 0.01	1.00E00	1.00E00
chromatin loop anchoring activity (GO:0140587)	1	0	.02	-	< 0.01	1.00E00	1.00E00
poly(A)-specific ribonuclease activity (GO:0004535)	13	0	.21	-	< 0.01	1.00E00	1.00E00
5'-3' exoribonuclease activity (GO:0004534)	3	0	.05	-	< 0.01	1.00E00	1.00E00
enone reductase activity (GO:0035671)	5	0	.08	-	< 0.01	1.00E00	1.00E00
promoter-enhancer loop anchoring activity (GO:0140585)	1	0	.02	-	< 0.01	1.00E00	1.00E00
exoribonuclease activity (GO:0004532)	39	0	.62	-	< 0.01	1.00E00	1.00E00
deoxyribonuclease II activity (GO:0004531)	2	0	.03	-	< 0.01	1.00E00	1.00E00
deoxyribonuclease I activity (GO:0004530)	5	0	.08	-	< 0.01	1.00E00	1.00E00
P-type monovalent copper transporter activity (GO:0140581)	2	0	.03	-	< 0.01	1.00E00	1.00E00
rRNA (adenine-N6,N6-)-dimethyltransferase activity (GO:0000179)	4	0	.06	-	< 0.01	1.00E00	1.00E00
talin binding (GO:1990147)	1	0	.02	-	< 0.01	1.00E00	1.00E00
adenosine-phosphate deaminase activity (GO:0047623)	3	0	.05	-	< 0.01	1.00E00	1.00E00
acylpyruvate hydrolase activity (GO:0047621)	1	0	.02	-	< 0.01	1.00E00	1.00E00
3'-5'-exoribonuclease activity (GO:0000175)	35	0	.56	-	< 0.01	1.00E00	1.00E00
acylglycerol kinase activity (GO:0047620)	1	0	.02	-	< 0.01	1.00E00	1.00E00
ribonuclease MRP activity (GO:0000171)	1	0	.02	-	< 0.01	1.00E00	1.00E00
sphingosine hydroxylase activity (GO:0000170)	1	0	.02	-	< 0.01	1.00E00	1.00E00
adenosine-diphosphatase activity (GO:0043262)	2	0	.03	-	< 0.01	1.00E00	1.00E00
exodeoxyribonuclease activity (GO:0004529)	23	1	.37	+	2.74	3.15E-01	1.00E00
phosphodiesterase I activity (GO:0004528)	6	0	.10	-	< 0.01	1.00E00	1.00E00
exonuclease activity (GO:0004527)	82	1	1.30	-	.77	1.00E00	1.00E00
ribonuclease P activity (GO:0004526)	11	0	.17	-	< 0.01	1.00E00	1.00E00
Toll-like receptor 2 binding (GO:0035663)	3	0	.05	-	< 0.01	1.00E00	1.00E00
ribonuclease III activity (GO:0004525)	3	0	.05	-	< 0.01	1.00E00	1.00E00
Toll-like receptor 4 binding (GO:0035662)	4	0	.06	-	< 0.01	1.00E00	1.00E00
transmembrane monodehydroascorbate reductase activity (GO:0140575)	3	0	.05	-	< 0.01	1.00E00	1.00E00
RNA-DNA hybrid ribonuclease activity (GO:0004523)	16	0	.25	-	< 0.01	1.00E00	1.00E00
ribonuclease A activity (GO:0004522)	4	0	.06	-	< 0.01	1.00E00	1.00E00
endoribonuclease activity (GO:0004521)	73	0	1.16	-	< 0.01	6.32E-01	1.00E00
endodeoxyribonuclease activity (GO:0004520)	40	0	.64	-	< 0.01	1.00E00	1.00E00
transmembrane ascorbate ferrireductase activity (GO:0140571)	4	0	.06	-	< 0.01	1.00E00	1.00E00
aconitate decarboxylase activity (GO:0047613)	1	0	.02	-	< 0.01	1.00E00	1.00E00
linoleate 9S-lipoxygenase activity (GO:1990136)	2	0	.03	-	< 0.01	1.00E00	1.00E00
acetylspermidine deacetylase activity (GO:0047611)	1	0	.02	-	< 0.01	1.00E00	1.00E00
endonuclease activity (GO:0004519)	130	0	2.06	-	< 0.01	2.75E-01	1.00E00
nuclease activity (GO:0004518)	212	2	3.37	-	.59	7.78E-01	1.00E00
sodium-dependent organic anion transmembrane transporter activity (GO:0043250)	1	0	.02	-	< 0.01	1.00E00	1.00E00
nitric-oxide synthase activity (GO:0004517)	3	0	.05	-	< 0.01	1.00E00	1.00E00
nicotinate phosphoribosyltransferase activity (GO:0004516)	1	0	.02	-	< 0.01	1.00E00	1.00E00
transmembrane protein dislocase activity (GO:0140567)	2	0	.03	-	< 0.01	1.00E00	1.00E00
nicotinate-nucleotide adenylyltransferase activity (GO:0004515)	4	0	.06	-	< 0.01	1.00E00	1.00E00
nicotinate-nucleotide diphosphorylase (carboxylating) activity (GO:0004514)	3	0	.05	-	< 0.01	1.00E00	1.00E00
AP-3 adaptor complex binding (GO:0035651)	3	0	.05	-	< 0.01	1.00E00	1.00E00
neolactotetraosylceramide alpha-2,3-sialyltransferase activity (GO:0004513)	2	0	.03	-	< 0.01	1.00E00	1.00E00
AP-1 adaptor complex binding (GO:0035650)	5	0	.08	-	< 0.01	1.00E00	1.00E00
inositol-3-phosphate synthase activity (GO:0004512)	1	0	.02	-	< 0.01	1.00E00	1.00E00
UDP-D-xylose:beta-D-glucoside alpha-1,3-D-xylosyltransferase activity (GO:0140563)	2	0	.03	-	< 0.01	1.00E00	1.00E00
tyrosine 3-monooxygenase activity (GO:0004511)	1	0	.02	-	< 0.01	1.00E00	1.00E00
EGF-domain serine xylosyltransferase activity (GO:0140562)	3	0	.05	-	< 0.01	1.00E00	1.00E00
tryptophan 5-monooxygenase activity (GO:0004510)	2	0	.03	-	< 0.01	1.00E00	1.00E00
acetylputrescine deacetylase activity (GO:0047609)	1	0	.02	-	< 0.01	1.00E00	1.00E00
EGF-domain serine glucosyltransferase activity (GO:0140561)	3	0	.05	-	< 0.01	1.00E00	1.00E00
xylosyl alpha-1,3-xylosyltransferase activity (GO:0140560)	1	0	.02	-	< 0.01	1.00E00	1.00E00
acetoacetyl-CoA hydrolase activity (GO:0047603)	1	0	.02	-	< 0.01	1.00E00	1.00E00
DNA strand exchange activity (GO:0000150)	2	0	.03	-	< 0.01	1.00E00	1.00E00
steroid 21-monooxygenase activity (GO:0004509)	1	0	.02	-	< 0.01	1.00E00	1.00E00
steroid 17-alpha-monooxygenase activity (GO:0004508)	1	0	.02	-	< 0.01	1.00E00	1.00E00
steroid 11-beta-monooxygenase activity (GO:0004507)	2	0	.03	-	< 0.01	1.00E00	1.00E00
squalene monooxygenase activity (GO:0004506)	1	0	.02	-	< 0.01	1.00E00	1.00E00
L-DOPA receptor activity (GO:0035643)	1	0	.02	-	< 0.01	1.00E00	1.00E00
phenylalanine 4-monooxygenase activity (GO:0004505)	3	0	.05	-	< 0.01	1.00E00	1.00E00
histone methyltransferase activity (H3-R17 specific) (GO:0035642)	1	0	.02	-	< 0.01	1.00E00	1.00E00
peptidylglycine monooxygenase activity (GO:0004504)	1	0	.02	-	< 0.01	1.00E00	1.00E00
L-arginine 3-hydroxylase activity (GO:0140554)	1	0	.02	-	< 0.01	1.00E00	1.00E00
kynurenine 3-monooxygenase activity (GO:0004502)	1	0	.02	-	< 0.01	1.00E00	1.00E00
dopamine beta-monooxygenase activity (GO:0004500)	3	0	.05	-	< 0.01	1.00E00	1.00E00
SNARE binding (GO:0000149)	113	1	1.79	-	.56	1.00E00	1.00E00
microfilament motor activity (GO:0000146)	30	1	.48	+	2.10	3.87E-01	1.00E00
acylglycerone-phosphate reductase activity (GO:0000140)	1	0	.02	-	< 0.01	1.00E00	1.00E00
transmembrane receptor protein kinase activity (GO:0019199)	144	4	2.29	+	1.75	2.98E-01	1.00E00
ATPase-coupled inorganic anion transmembrane transporter activity (GO:0043225)	26	0	.41	-	< 0.01	1.00E00	1.00E00
transmembrane receptor protein phosphatase activity (GO:0019198)	17	1	.27	+	3.70	2.47E-01	1.00E00
SMC family protein binding (GO:0043221)	1	0	.02	-	< 0.01	1.00E00	1.00E00
transcription regulator activator activity (GO:0140537)	3	0	.05	-	< 0.01	1.00E00	1.00E00
nuclear receptor corepressor activity (GO:0140536)	1	0	.02	-	< 0.01	1.00E00	1.00E00
glycerol-1-phosphatase activity (GO:0000121)	1	0	.02	-	< 0.01	1.00E00	1.00E00
beta-1,4-mannosyltransferase activity (GO:0019187)	1	0	.02	-	< 0.01	1.00E00	1.00E00
resveratrol binding (GO:1905594)	1	0	.02	-	< 0.01	1.00E00	1.00E00
clathrin adaptor activity (GO:0035615)	19	0	.30	-	< 0.01	1.00E00	1.00E00
alkanesulfonate binding (GO:0043210)	1	0	.02	-	< 0.01	1.00E00	1.00E00
RNA stem-loop binding (GO:0035613)	22	1	.35	+	2.86	3.04E-01	1.00E00
AP-2 adaptor complex binding (GO:0035612)	10	0	.16	-	< 0.01	1.00E00	1.00E00
glycosphingolipid binding (GO:0043208)	10	0	.16	-	< 0.01	1.00E00	1.00E00
NADP phosphatase activity (GO:0019178)	1	0	.02	-	< 0.01	1.00E00	1.00E00
peptidyl-cysteine S-nitrosylase activity (GO:0035605)	1	0	.02	-	< 0.01	1.00E00	1.00E00
protein-RNA adaptor activity (GO:0140517)	1	0	.02	-	< 0.01	1.00E00	1.00E00
denatured protein binding (GO:0031249)	1	0	.02	-	< 0.01	1.00E00	1.00E00
succinate dehydrogenase activity (GO:0000104)	2	0	.03	-	< 0.01	1.00E00	1.00E00
ganglioside GP1c binding (GO:1905577)	1	0	.02	-	< 0.01	1.00E00	1.00E00
ganglioside GT1b binding (GO:1905576)	3	0	.05	-	< 0.01	1.00E00	1.00E00
ganglioside GM3 binding (GO:1905575)	1	0	.02	-	< 0.01	1.00E00	1.00E00
trans-2-enoyl-CoA reductase (NADPH) activity (GO:0019166)	3	0	.05	-	< 0.01	1.00E00	1.00E00
ganglioside GM2 binding (GO:1905574)	1	0	.02	-	< 0.01	1.00E00	1.00E00
ganglioside GM1 binding (GO:1905573)	3	0	.05	-	< 0.01	1.00E00	1.00E00
N-acylmannosamine kinase activity (GO:0009384)	1	0	.02	-	< 0.01	1.00E00	1.00E00
rRNA (cytosine-C5-)-methyltransferase activity (GO:0009383)	3	0	.05	-	< 0.01	1.00E00	1.00E00
methylputrescine oxidase activity (GO:0052599)	1	0	.02	-	< 0.01	1.00E00	1.00E00
histamine oxidase activity (GO:0052598)	1	0	.02	-	< 0.01	1.00E00	1.00E00
diamine oxidase activity (GO:0052597)	1	0	.02	-	< 0.01	1.00E00	1.00E00
phenethylamine:oxygen oxidoreductase (deaminating) activity (GO:0052596)	2	0	.03	-	< 0.01	1.00E00	1.00E00
aliphatic-amine oxidase activity (GO:0052595)	2	0	.03	-	< 0.01	1.00E00	1.00E00
aminoacetone:oxygen oxidoreductase(deaminating) activity (GO:0052594)	2	0	.03	-	< 0.01	1.00E00	1.00E00
tryptamine:oxygen oxidoreductase (deaminating) activity (GO:0052593)	2	0	.03	-	< 0.01	1.00E00	1.00E00
mannokinase activity (GO:0019158)	5	0	.08	-	< 0.01	1.00E00	1.00E00
sn-glycerol-3-phosphate:ubiquinone-8 oxidoreductase activity (GO:0052591)	1	0	.02	-	< 0.01	1.00E00	1.00E00
sn-glycerol-3-phosphate:ubiquinone oxidoreductase activity (GO:0052590)	1	0	.02	-	< 0.01	1.00E00	1.00E00
protein-disulfide reductase (glutathione) activity (GO:0019153)	1	0	.02	-	< 0.01	1.00E00	1.00E00
D-ribulokinase activity (GO:0019150)	1	0	.02	-	< 0.01	1.00E00	1.00E00
four-way junction helicase activity (GO:0009378)	6	0	.10	-	< 0.01	1.00E00	1.00E00
biotin binding (GO:0009374)	5	0	.08	-	< 0.01	1.00E00	1.00E00
apelin receptor activity (GO:0060182)	1	0	.02	-	< 0.01	1.00E00	1.00E00
aminobutyraldehyde dehydrogenase activity (GO:0019145)	2	0	.03	-	< 0.01	1.00E00	1.00E00
ADP-sugar diphosphatase activity (GO:0019144)	2	0	.03	-	< 0.01	1.00E00	1.00E00
glucuronyl-galactosyl-proteoglycan 4-alpha-N-acetylglucosaminyltransferase activity (GO:0001888)	2	0	.03	-	< 0.01	1.00E00	1.00E00
brain-derived neurotrophic factor-activated receptor activity (GO:0060175)	1	0	.02	-	< 0.01	1.00E00	1.00E00
phosphatidylcholine binding (GO:0031210)	31	1	.49	+	2.03	3.96E-01	1.00E00
purine nucleoside binding (GO:0001883)	3	0	.05	-	< 0.01	1.00E00	1.00E00
nucleoside binding (GO:0001882)	9	0	.14	-	< 0.01	1.00E00	1.00E00
deoxynucleoside kinase activity (GO:0019136)	4	0	.06	-	< 0.01	1.00E00	1.00E00
deoxyhypusine monooxygenase activity (GO:0019135)	1	0	.02	-	< 0.01	1.00E00	1.00E00
histone methyltransferase activity (H4-K20 specific) (GO:0042799)	7	1	.11	+	9.00	1.18E-01	1.00E00
POZ domain binding (GO:0031208)	3	0	.05	-	< 0.01	1.00E00	1.00E00
lipopolysaccharide immune receptor activity (GO:0001875)	5	0	.08	-	< 0.01	1.00E00	1.00E00
(1->3)-beta-D-glucan binding (GO:0001872)	2	0	.03	-	< 0.01	1.00E00	1.00E00
polysome binding (GO:1905538)	6	0	.10	-	< 0.01	1.00E00	1.00E00
3'-tRNA processing endoribonuclease activity (GO:0042781)	2	0	.03	-	< 0.01	1.00E00	1.00E00
complement component C4b receptor activity (GO:0001861)	1	0	.02	-	< 0.01	1.00E00	1.00E00
benzaldehyde dehydrogenase [NAD(P)+] activity (GO:0019115)	4	0	.06	-	< 0.01	1.00E00	1.00E00
limonene monooxygenase activity (GO:0019113)	2	0	.03	-	< 0.01	1.00E00	1.00E00
cholesterol dehydrogenase activity (GO:0102294)	2	0	.03	-	< 0.01	1.00E00	1.00E00
complement component C5a binding (GO:0001856)	1	0	.02	-	< 0.01	1.00E00	1.00E00
complement component C4b binding (GO:0001855)	2	0	.03	-	< 0.01	1.00E00	1.00E00
myristoyltransferase activity (GO:0019107)	11	0	.17	-	< 0.01	1.00E00	1.00E00
DNA N-glycosylase activity (GO:0019104)	13	0	.21	-	< 0.01	1.00E00	1.00E00
pyrimidine nucleotide binding (GO:0019103)	6	0	.10	-	< 0.01	1.00E00	1.00E00
complement component C1q complex binding (GO:0001849)	8	0	.13	-	< 0.01	1.00E00	1.00E00
opsonin receptor activity (GO:0001847)	4	0	.06	-	< 0.01	1.00E00	1.00E00
triphosphatase activity (GO:0050355)	1	0	.02	-	< 0.01	1.00E00	1.00E00
lecithin:11-cis retinol acyltransferase activity (GO:0102279)	1	0	.02	-	< 0.01	1.00E00	1.00E00
triokinase activity (GO:0050354)	1	0	.02	-	< 0.01	1.00E00	1.00E00
acetyl-CoA binding (GO:1905502)	3	0	.05	-	< 0.01	1.00E00	1.00E00
trimethyllysine dioxygenase activity (GO:0050353)	1	0	.02	-	< 0.01	1.00E00	1.00E00
membrane insertase activity (GO:0032977)	14	0	.22	-	< 0.01	1.00E00	1.00E00
methylarsonite methyltransferase activity (GO:0030792)	2	0	.03	-	< 0.01	1.00E00	1.00E00
arsenite methyltransferase activity (GO:0030791)	1	0	.02	-	< 0.01	1.00E00	1.00E00
trans-octaprenyltranstransferase activity (GO:0050347)	2	0	.03	-	< 0.01	1.00E00	1.00E00
trans-L-3-hydroxyproline dehydratase activity (GO:0050346)	1	0	.02	-	< 0.01	1.00E00	1.00E00
tRNA-dihydrouridine20 synthase activity (GO:0102264)	1	0	.02	-	< 0.01	1.00E00	1.00E00
UDP-glucuronate decarboxylase activity (GO:0048040)	1	0	.02	-	< 0.01	1.00E00	1.00E00
purine nucleotide-sugar transmembrane transporter activity (GO:0036080)	1	0	.02	-	< 0.01	1.00E00	1.00E00
thiosulfate-thiol sulfurtransferase activity (GO:0050337)	1	0	.02	-	< 0.01	1.00E00	1.00E00
ubiquinone binding (GO:0048039)	7	0	.11	-	< 0.01	1.00E00	1.00E00
1,2-diacylglycerol acylhydrolase activity (GO:0102259)	1	0	.02	-	< 0.01	1.00E00	1.00E00
quinone binding (GO:0048038)	18	0	.29	-	< 0.01	1.00E00	1.00E00
1,3-diacylglycerol acylhydrolase activity (GO:0102258)	1	0	.02	-	< 0.01	1.00E00	1.00E00
thiamin-triphosphatase activity (GO:0050333)	1	0	.02	-	< 0.01	1.00E00	1.00E00
tau-protein kinase activity (GO:0050321)	22	0	.35	-	< 0.01	1.00E00	1.00E00
CCR chemokine receptor binding (GO:0048020)	46	0	.73	-	< 0.01	1.00E00	1.00E00
pyridine N-methyltransferase activity (GO:0030760)	1	0	.02	-	< 0.01	1.00E00	1.00E00
receptor antagonist activity (GO:0048019)	33	0	.52	-	< 0.01	1.00E00	1.00E00
receptor ligand activity (GO:0048018)	491	4	7.80	-	.51	2.01E-01	1.00E00
sulfur dioxygenase activity (GO:0050313)	1	0	.02	-	< 0.01	1.00E00	1.00E00
alkane 1-monooxygenase activity (GO:0018685)	5	0	.08	-	< 0.01	1.00E00	1.00E00
11-cis-retinal 3,4-desaturase activity (GO:0061899)	1	0	.02	-	< 0.01	1.00E00	1.00E00
all-trans retinoic acid 3,4-desaturase activity (GO:0061898)	1	0	.02	-	< 0.01	1.00E00	1.00E00
all-trans retinal 3,4-desaturase activity (GO:0061897)	1	0	.02	-	< 0.01	1.00E00	1.00E00
all-trans retinol 3,4-desaturase activity (GO:0061896)	1	0	.02	-	< 0.01	1.00E00	1.00E00
protein-succinyllysine desuccinylase activity (GO:0036055)	2	0	.03	-	< 0.01	1.00E00	1.00E00
protein-malonyllysine demalonylase activity (GO:0036054)	1	0	.02	-	< 0.01	1.00E00	1.00E00
calcium ion sensor activity (GO:0061891)	4	0	.06	-	< 0.01	1.00E00	1.00E00
sugar-terminal-phosphatase activity (GO:0050309)	3	0	.05	-	< 0.01	1.00E00	1.00E00
(S)-limonene 7-monooxygenase activity (GO:0018676)	2	0	.03	-	< 0.01	1.00E00	1.00E00
(S)-limonene 6-monooxygenase activity (GO:0018675)	2	0	.03	-	< 0.01	1.00E00	1.00E00
orexin receptor activity (GO:0016499)	2	0	.03	-	< 0.01	1.00E00	1.00E00
substance K receptor activity (GO:0016497)	1	0	.02	-	< 0.01	1.00E00	1.00E00
substance P receptor activity (GO:0016496)	1	0	.02	-	< 0.01	1.00E00	1.00E00
C-X3-C chemokine receptor activity (GO:0016495)	1	0	.02	-	< 0.01	1.00E00	1.00E00
C-X-C chemokine receptor activity (GO:0016494)	8	0	.13	-	< 0.01	1.00E00	1.00E00
C-C chemokine receptor activity (GO:0016493)	23	0	.37	-	< 0.01	1.00E00	1.00E00
holo-[acyl-carrier-protein] synthase activity (GO:0008897)	1	0	.02	-	< 0.01	1.00E00	1.00E00
G protein-coupled neurotensin receptor activity (GO:0016492)	2	0	.03	-	< 0.01	1.00E00	1.00E00
amine N-methyltransferase activity (GO:0030748)	1	0	.02	-	< 0.01	1.00E00	1.00E00
guanosine-5'-triphosphate,3'-diphosphate diphosphatase activity (GO:0008894)	1	0	.02	-	< 0.01	1.00E00	1.00E00
guanosine-3',5'-bis(diphosphate) 3'-diphosphatase activity (GO:0008893)	1	0	.02	-	< 0.01	1.00E00	1.00E00
guanine deaminase activity (GO:0008892)	1	0	.02	-	< 0.01	1.00E00	1.00E00
glycolate oxidase activity (GO:0008891)	1	0	.02	-	< 0.01	1.00E00	1.00E00
glycine C-acetyltransferase activity (GO:0008890)	1	0	.02	-	< 0.01	1.00E00	1.00E00
long-chain fatty acyl-CoA binding (GO:0036042)	7	1	.11	+	9.00	1.18E-01	1.00E00
GTP-dependent protein binding (GO:0030742)	22	1	.35	+	2.86	3.04E-01	1.00E00
long-chain fatty acid binding (GO:0036041)	14	0	.22	-	< 0.01	1.00E00	1.00E00
glycerophosphodiester phosphodiesterase activity (GO:0008889)	2	0	.03	-	< 0.01	1.00E00	1.00E00
glycerate kinase activity (GO:0008887)	1	0	.02	-	< 0.01	1.00E00	1.00E00
carnosine N-methyltransferase activity (GO:0030735)	1	0	.02	-	< 0.01	1.00E00	1.00E00
mediator complex binding (GO:0036033)	4	0	.06	-	< 0.01	1.00E00	1.00E00
guanidinoacetate N-methyltransferase activity (GO:0030731)	1	0	.02	-	< 0.01	1.00E00	1.00E00
docosanoate omega-hydroxylase activity (GO:0102207)	2	0	.03	-	< 0.01	1.00E00	1.00E00
N-acetylphosphatidylethanolamine-hydrolysing phospholipase activity (GO:0102200)	1	0	.02	-	< 0.01	1.00E00	1.00E00
acetoacetate-CoA ligase activity (GO:0030729)	1	0	.02	-	< 0.01	1.00E00	1.00E00
microtubule plus end polymerase (GO:0061863)	1	0	.02	-	< 0.01	1.00E00	1.00E00
dihydroceramidase activity (GO:0071633)	3	0	.05	-	< 0.01	1.00E00	1.00E00
fructokinase activity (GO:0008865)	5	0	.08	-	< 0.01	1.00E00	1.00E00
phenanthrene 9,10-monooxygenase activity (GO:0018636)	3	0	.05	-	< 0.01	1.00E00	1.00E00
exoribonuclease II activity (GO:0008859)	1	0	.02	-	< 0.01	1.00E00	1.00E00
C-palmitoyltransferase activity (GO:0016454)	5	0	.08	-	< 0.01	1.00E00	1.00E00
telomeric G-quadruplex DNA binding (GO:0061849)	2	0	.03	-	< 0.01	1.00E00	1.00E00
protein-glutamine N-methyltransferase activity (GO:0036009)	3	0	.05	-	< 0.01	1.00E00	1.00E00
exodeoxyribonuclease III activity (GO:0008853)	4	0	.06	-	< 0.01	1.00E00	1.00E00
exodeoxyribonuclease I activity (GO:0008852)	1	0	.02	-	< 0.01	1.00E00	1.00E00
GAF domain binding (GO:0036004)	1	0	.02	-	< 0.01	1.00E00	1.00E00
pre-mRNA binding (GO:0036002)	39	0	.62	-	< 0.01	1.00E00	1.00E00
N,N-dimethylaniline monooxygenase activity (GO:0004499)	6	0	.10	-	< 0.01	1.00E00	1.00E00
calcidiol 1-monooxygenase activity (GO:0004498)	1	0	.02	-	< 0.01	1.00E00	1.00E00
monooxygenase activity (GO:0004497)	106	1	1.68	-	.59	1.00E00	1.00E00
mevalonate kinase activity (GO:0004496)	1	0	.02	-	< 0.01	1.00E00	1.00E00
methylmalonyl-CoA mutase activity (GO:0004494)	1	0	.02	-	< 0.01	1.00E00	1.00E00
methylmalonyl-CoA epimerase activity (GO:0004493)	1	0	.02	-	< 0.01	1.00E00	1.00E00
lysophospholipid acyltransferase activity (GO:0071617)	23	0	.37	-	< 0.01	1.00E00	1.00E00
methylmalonate-semialdehyde dehydrogenase (acylating) activity (GO:0004491)	1	0	.02	-	< 0.01	1.00E00	1.00E00
methylglutaconyl-CoA hydratase activity (GO:0004490)	1	0	.02	-	< 0.01	1.00E00	1.00E00
linoleic acid epoxygenase activity (GO:0071614)	1	0	.02	-	< 0.01	1.00E00	1.00E00
endochitinase activity (GO:0008843)	1	0	.02	-	< 0.01	1.00E00	1.00E00
methylenetetrahydrofolate reductase (NAD(P)H) activity (GO:0004489)	1	0	.02	-	< 0.01	1.00E00	1.00E00
methylenetetrahydrofolate dehydrogenase (NADP+) activity (GO:0004488)	4	0	.06	-	< 0.01	1.00E00	1.00E00
methylenetetrahydrofolate dehydrogenase (NAD+) activity (GO:0004487)	3	0	.05	-	< 0.01	1.00E00	1.00E00
methylenetetrahydrofolate dehydrogenase [NAD(P)+] activity (GO:0004486)	4	0	.06	-	< 0.01	1.00E00	1.00E00
methylcrotonoyl-CoA carboxylase activity (GO:0004485)	2	0	.03	-	< 0.01	1.00E00	1.00E00
mRNA guanylyltransferase activity (GO:0004484)	1	0	.02	-	< 0.01	1.00E00	1.00E00
mRNA (nucleoside-2'-O-)-methyltransferase activity (GO:0004483)	2	0	.03	-	< 0.01	1.00E00	1.00E00
mRNA (guanine-N7-)-methyltransferase activity (GO:0004482)	1	0	.02	-	< 0.01	1.00E00	1.00E00
tRNA cytidylyltransferase activity (GO:0016437)	1	0	.02	-	< 0.01	1.00E00	1.00E00
rRNA (uridine) methyltransferase activity (GO:0016436)	3	0	.05	-	< 0.01	1.00E00	1.00E00
rRNA (guanine) methyltransferase activity (GO:0016435)	4	0	.06	-	< 0.01	1.00E00	1.00E00
rRNA (cytosine) methyltransferase activity (GO:0016434)	5	0	.08	-	< 0.01	1.00E00	1.00E00
rRNA (adenine) methyltransferase activity (GO:0016433)	9	0	.14	-	< 0.01	1.00E00	1.00E00
tRNA-uridine aminocarboxypropyltransferase activity (GO:0016432)	3	0	.05	-	< 0.01	1.00E00	1.00E00
tRNA (adenine-N6-)-methyltransferase activity (GO:0016430)	1	0	.02	-	< 0.01	1.00E00	1.00E00
dGTPase activity (GO:0008832)	1	0	.02	-	< 0.01	1.00E00	1.00E00
telomeric D-loop binding (GO:0061821)	4	0	.06	-	< 0.01	1.00E00	1.00E00
methionyl-tRNA formyltransferase activity (GO:0004479)	1	0	.02	-	< 0.01	1.00E00	1.00E00
methionine adenosyltransferase activity (GO:0004478)	2	0	.03	-	< 0.01	1.00E00	1.00E00
methenyltetrahydrofolate cyclohydrolase activity (GO:0004477)	3	0	.05	-	< 0.01	1.00E00	1.00E00
mannose-6-phosphate isomerase activity (GO:0004476)	2	0	.03	-	< 0.01	1.00E00	1.00E00
mannose-1-phosphate guanylyltransferase activity (GO:0004475)	1	0	.02	-	< 0.01	1.00E00	1.00E00
malate synthase activity (GO:0004474)	1	0	.02	-	< 0.01	1.00E00	1.00E00
malate dehydrogenase (decarboxylating) (NADP+) activity (GO:0004473)	3	0	.05	-	< 0.01	1.00E00	1.00E00
malate dehydrogenase (decarboxylating) (NAD+) activity (GO:0004471)	3	0	.05	-	< 0.01	1.00E00	1.00E00
malic enzyme activity (GO:0004470)	4	0	.06	-	< 0.01	1.00E00	1.00E00
tRNA (adenine-N1-)-methyltransferase activity (GO:0016429)	3	0	.05	-	< 0.01	1.00E00	1.00E00
tRNA (cytosine-5-)-methyltransferase activity (GO:0016428)	4	0	.06	-	< 0.01	1.00E00	1.00E00
4-nitrophenol 2-monooxygenase activity (GO:0018601)	1	0	.02	-	< 0.01	1.00E00	1.00E00
tRNA (cytosine) methyltransferase activity (GO:0016427)	9	0	.14	-	< 0.01	1.00E00	1.00E00
tRNA (adenine) methyltransferase activity (GO:0016426)	4	0	.06	-	< 0.01	1.00E00	1.00E00
dCTP deaminase activity (GO:0008829)	1	0	.02	-	< 0.01	1.00E00	1.00E00
dATP pyrophosphohydrolase activity (GO:0008828)	1	0	.02	-	< 0.01	1.00E00	1.00E00
tRNA (guanine) methyltransferase activity (GO:0016423)	15	0	.24	-	< 0.01	1.00E00	1.00E00
3-dehydrosphinganine reductase activity (GO:0047560)	1	0	.02	-	< 0.01	1.00E00	1.00E00
mRNA (2'-O-methyladenosine-N6-)-methyltransferase activity (GO:0016422)	3	0	.05	-	< 0.01	1.00E00	1.00E00
CoA carboxylase activity (GO:0016421)	6	0	.10	-	< 0.01	1.00E00	1.00E00
trimethylamine receptor activity (GO:1990081)	1	0	.02	-	< 0.01	1.00E00	1.00E00
cupric reductase activity (GO:0008823)	3	0	.05	-	< 0.01	1.00E00	1.00E00
cyclic ADP-ribose hydrolase (GO:0061812)	1	0	.02	-	< 0.01	1.00E00	1.00E00
crossover junction endodeoxyribonuclease activity (GO:0008821)	5	0	.08	-	< 0.01	1.00E00	1.00E00
ADP-ribosyl cyclase activity (GO:0061811)	1	0	.02	-	< 0.01	1.00E00	1.00E00
lysine N-acetyltransferase activity, acting on acetyl phosphate as donor (GO:0004468)	6	0	.10	-	< 0.01	1.00E00	1.00E00
long-chain-acyl-CoA dehydrogenase activity (GO:0004466)	5	0	.08	-	< 0.01	1.00E00	1.00E00
lipoprotein lipase activity (GO:0004465)	11	1	.17	+	5.73	1.72E-01	1.00E00
leukotriene-C4 synthase activity (GO:0004464)	5	0	.08	-	< 0.01	1.00E00	1.00E00
leukotriene-A4 hydrolase activity (GO:0004463)	1	0	.02	-	< 0.01	1.00E00	1.00E00
lactoylglutathione lyase activity (GO:0004462)	1	0	.02	-	< 0.01	1.00E00	1.00E00
lactose synthase activity (GO:0004461)	3	0	.05	-	< 0.01	1.00E00	1.00E00
3',5'-cyclic-GMP phosphodiesterase activity (GO:0047555)	14	0	.22	-	< 0.01	1.00E00	1.00E00
S-acyltransferase activity (GO:0016417)	32	1	.51	+	1.97	4.06E-01	1.00E00
O-palmitoyltransferase activity (GO:0016416)	5	0	.08	-	< 0.01	1.00E00	1.00E00
octanoyltransferase activity (GO:0016415)	4	0	.06	-	< 0.01	1.00E00	1.00E00
O-octanoyltransferase activity (GO:0016414)	3	0	.05	-	< 0.01	1.00E00	1.00E00
NAD+ nucleotidase, cyclic ADP-ribose generating (GO:0061809)	16	0	.25	-	< 0.01	1.00E00	1.00E00
O-acetyltransferase activity (GO:0016413)	8	0	.13	-	< 0.01	1.00E00	1.00E00
cob(I)yrinic acid a,c-diamide adenosyltransferase activity (GO:0008817)	1	0	.02	-	< 0.01	1.00E00	1.00E00
serine O-acyltransferase activity (GO:0016412)	1	0	.02	-	< 0.01	1.00E00	1.00E00
acylglycerol O-acyltransferase activity (GO:0016411)	31	0	.49	-	< 0.01	1.00E00	1.00E00
N-acyltransferase activity (GO:0016410)	101	0	1.60	-	< 0.01	4.13E-01	1.00E00
sulfate binding (GO:0043199)	4	0	.06	-	< 0.01	1.00E00	1.00E00
choline dehydrogenase activity (GO:0008812)	1	0	.02	-	< 0.01	1.00E00	1.00E00
chloramphenicol O-acetyltransferase activity (GO:0008811)	1	0	.02	-	< 0.01	1.00E00	1.00E00
N6-threonylcarbomyladenosine methylthiotransferase activity (GO:0035598)	1	0	.02	-	< 0.01	1.00E00	1.00E00
N6-isopentenyladenosine methylthiotransferase activity (GO:0035597)	1	0	.02	-	< 0.01	1.00E00	1.00E00
methylthiotransferase activity (GO:0035596)	2	0	.03	-	< 0.01	1.00E00	1.00E00
ganglioside binding (GO:0035594)	5	0	.08	-	< 0.01	1.00E00	1.00E00
ketohexokinase activity (GO:0004454)	1	0	.02	-	< 0.01	1.00E00	1.00E00
signaling adaptor activity (GO:0035591)	72	1	1.14	-	.87	1.00E00	1.00E00
isopentenyl-diphosphate delta-isomerase activity (GO:0004452)	2	0	.03	-	< 0.01	1.00E00	1.00E00
palmitoyltransferase activity (GO:0016409)	39	0	.62	-	< 0.01	1.00E00	1.00E00
2-hydroxyglutarate dehydrogenase activity (GO:0047545)	1	0	.02	-	< 0.01	1.00E00	1.00E00
sulfur amino acid transmembrane transporter activity (GO:0000099)	9	0	.14	-	< 0.01	1.00E00	1.00E00
carnitine O-acyltransferase activity (GO:0016406)	6	0	.10	-	< 0.01	1.00E00	1.00E00
15-hydroxyprostaglandin dehydrogenase (NAD+) activity (GO:0016404)	2	0	.03	-	< 0.01	1.00E00	1.00E00
S-adenosyl-L-methionine transmembrane transporter activity (GO:0000095)	1	0	.02	-	< 0.01	1.00E00	1.00E00
cardiolipin synthase activity (GO:0008808)	1	0	.02	-	< 0.01	1.00E00	1.00E00
dimethylargininase activity (GO:0016403)	2	0	.03	-	< 0.01	1.00E00	1.00E00
pristanoyl-CoA oxidase activity (GO:0016402)	1	0	.02	-	< 0.01	1.00E00	1.00E00
palmitoyl-CoA oxidase activity (GO:0016401)	4	0	.06	-	< 0.01	1.00E00	1.00E00
bis(5'-nucleosyl)-tetraphosphatase (symmetrical) activity (GO:0008803)	1	0	.02	-	< 0.01	1.00E00	1.00E00
betaine-aldehyde dehydrogenase activity (GO:0008802)	1	0	.02	-	< 0.01	1.00E00	1.00E00
beta-lactamase activity (GO:0008800)	1	0	.02	-	< 0.01	1.00E00	1.00E00
vascular endothelial growth factor receptor 3 binding (GO:0043185)	2	0	.03	-	< 0.01	1.00E00	1.00E00
vascular endothelial growth factor receptor 2 binding (GO:0043184)	9	0	.14	-	< 0.01	1.00E00	1.00E00
vascular endothelial growth factor receptor 1 binding (GO:0043183)	3	0	.05	-	< 0.01	1.00E00	1.00E00
isocitrate dehydrogenase (NAD+) activity (GO:0004449)	3	0	.05	-	< 0.01	1.00E00	1.00E00
iodide peroxidase activity (GO:0004447)	3	0	.05	-	< 0.01	1.00E00	1.00E00
inositol-hexakisphosphate phosphatase activity (GO:0004446)	1	0	.02	-	< 0.01	1.00E00	1.00E00
inositol-polyphosphate 5-phosphatase activity (GO:0004445)	7	0	.11	-	< 0.01	1.00E00	1.00E00
inositol-1,4-bisphosphate 1-phosphatase activity (GO:0004441)	1	0	.02	-	< 0.01	1.00E00	1.00E00
2-aminoadipate transaminase activity (GO:0047536)	1	0	.02	-	< 0.01	1.00E00	1.00E00
C3HC4-type RING finger domain binding (GO:0055131)	6	0	.10	-	< 0.01	1.00E00	1.00E00
interleukin-1 type II receptor antagonist activity (GO:0045353)	1	0	.02	-	< 0.01	1.00E00	1.00E00
phosphatidic acid transfer activity (GO:1990050)	7	0	.11	-	< 0.01	1.00E00	1.00E00
interleukin-1 type I receptor antagonist activity (GO:0045352)	1	0	.02	-	< 0.01	1.00E00	1.00E00
amine binding (GO:0043176)	12	0	.19	-	< 0.01	1.00E00	1.00E00
RNA polymerase core enzyme binding (GO:0043175)	43	0	.68	-	< 0.01	1.00E00	1.00E00
phosphatidylinositol-4,5-bisphosphate 5-phosphatase activity (GO:0004439)	9	0	.14	-	< 0.01	1.00E00	1.00E00
phosphatidylinositol-3-phosphatase activity (GO:0004438)	18	0	.29	-	< 0.01	1.00E00	1.00E00
histone demethylase activity (H4-K20 specific) (GO:0035575)	3	0	.05	-	< 0.01	1.00E00	1.00E00
phosphatidylinositol phospholipase C activity (GO:0004435)	26	0	.41	-	< 0.01	1.00E00	1.00E00
1-phosphatidylinositol 4-kinase activity (GO:0004430)	6	0	.10	-	< 0.01	1.00E00	1.00E00
ABC-type iron-sulfur cluster transporter activity (GO:0140481)	1	0	.02	-	< 0.01	1.00E00	1.00E00
15-oxoprostaglandin 13-oxidase activity (GO:0047522)	3	0	.05	-	< 0.01	1.00E00	1.00E00
inorganic diphosphatase activity (GO:0004427)	4	0	.06	-	< 0.01	1.00E00	1.00E00
iduronate-2-sulfatase activity (GO:0004423)	1	0	.02	-	< 0.01	1.00E00	1.00E00
hypoxanthine phosphoribosyltransferase activity (GO:0004422)	1	0	.02	-	< 0.01	1.00E00	1.00E00
hydroxymethylglutaryl-CoA synthase activity (GO:0004421)	2	0	.03	-	< 0.01	1.00E00	1.00E00
hydroxymethylglutaryl-CoA reductase (NADPH) activity (GO:0004420)	1	0	.02	-	< 0.01	1.00E00	1.00E00
L-ornithine transmembrane transporter activity (GO:0000064)	5	0	.08	-	< 0.01	1.00E00	1.00E00
receptor-receptor interaction (GO:0090722)	4	0	.06	-	< 0.01	1.00E00	1.00E00
hydroxymethylglutaryl-CoA lyase activity (GO:0004419)	2	0	.03	-	< 0.01	1.00E00	1.00E00
hydroxymethylbilane synthase activity (GO:0004418)	1	0	.02	-	< 0.01	1.00E00	1.00E00
hydroxyacylglutathione hydrolase activity (GO:0004416)	3	0	.05	-	< 0.01	1.00E00	1.00E00
hyalurononglucosaminidase activity (GO:0004415)	8	0	.13	-	< 0.01	1.00E00	1.00E00
ubiquitin-protein transferase inhibitor activity (GO:0055105)	10	1	.16	+	6.30	1.59E-01	1.00E00
ligase regulator activity (GO:0055103)	1	0	.02	-	< 0.01	1.00E00	1.00E00
adiponectin binding (GO:0055100)	3	0	.05	-	< 0.01	1.00E00	1.00E00
unmethylated CpG binding (GO:0045322)	8	0	.13	-	< 0.01	1.00E00	1.00E00
holocytochrome-c synthase activity (GO:0004408)	1	0	.02	-	< 0.01	1.00E00	1.00E00
histone deacetylase activity (GO:0004407)	22	0	.35	-	< 0.01	1.00E00	1.00E00
protein demethylase activity (GO:0140457)	30	0	.48	-	< 0.01	1.00E00	1.00E00
histone acetyltransferase activity (GO:0004402)	43	0	.68	-	< 0.01	1.00E00	1.00E00
tRNA binding (GO:0000049)	73	1	1.16	-	.86	1.00E00	1.00E00
peptidyltransferase activity (GO:0000048)	5	0	.08	-	< 0.01	1.00E00	1.00E00
5'-3' DNA helicase activity (GO:0043139)	9	0	.14	-	< 0.01	1.00E00	1.00E00
3'-5' DNA helicase activity (GO:0043138)	16	0	.25	-	< 0.01	1.00E00	1.00E00
glycerol-3-phosphatase activity (GO:0043136)	2	0	.03	-	< 0.01	1.00E00	1.00E00
8-oxo-7,8-dihydrodeoxyguanosine triphosphate pyrophosphatase activity (GO:0035539)	2	0	.03	-	< 0.01	1.00E00	1.00E00
carbohydrate response element binding (GO:0035538)	1	0	.02	-	< 0.01	1.00E00	1.00E00
cytoskeleton-nuclear membrane anchor activity (GO:0140444)	5	0	.08	-	< 0.01	1.00E00	1.00E00
protein phosphorylated amino acid binding (GO:0045309)	56	1	.89	+	1.12	5.93E-01	1.00E00
acyl carrier activity (GO:0000036)	1	0	.02	-	< 0.01	1.00E00	1.00E00
acyl binding (GO:0000035)	2	0	.03	-	< 0.01	1.00E00	1.00E00
inosine-diphosphatase activity (GO:1990003)	2	0	.03	-	< 0.01	1.00E00	1.00E00
alpha-1,3-mannosyltransferase activity (GO:0000033)	3	0	.05	-	< 0.01	1.00E00	1.00E00
mannosyltransferase activity (GO:0000030)	25	0	.40	-	< 0.01	1.00E00	1.00E00
ErbB-3 class receptor binding (GO:0043125)	5	0	.08	-	< 0.01	1.00E00	1.00E00
NADH pyrophosphatase activity (GO:0035529)	9	0	.14	-	< 0.01	1.00E00	1.00E00
neurotrophin binding (GO:0043121)	9	0	.14	-	< 0.01	1.00E00	1.00E00
tumor necrosis factor binding (GO:0043120)	5	0	.08	-	< 0.01	1.00E00	1.00E00
protein-cysteine S-stearoyltransferase activity (GO:0140439)	7	0	.11	-	< 0.01	1.00E00	1.00E00
alpha-1,2-mannosyltransferase activity (GO:0000026)	4	0	.06	-	< 0.01	1.00E00	1.00E00
oxidative DNA demethylase activity (GO:0035516)	3	0	.05	-	< 0.01	1.00E00	1.00E00
oxidative RNA demethylase activity (GO:0035515)	5	0	.08	-	< 0.01	1.00E00	1.00E00
DNA demethylase activity (GO:0035514)	4	0	.06	-	< 0.01	1.00E00	1.00E00
lactase activity (GO:0000016)	1	0	.02	-	< 0.01	1.00E00	1.00E00
single-stranded DNA endodeoxyribonuclease activity (GO:0000014)	10	0	.16	-	< 0.01	1.00E00	1.00E00
histone methyltransferase activity (H3-K79 specific) (GO:0031151)	1	0	.02	-	< 0.01	1.00E00	1.00E00
trans-hexaprenyltranstransferase activity (GO:0000010)	2	0	.03	-	< 0.01	1.00E00	1.00E00
transcription regulator inhibitor activity (GO:0140416)	20	0	.32	-	< 0.01	1.00E00	1.00E00
peroxisome membrane targeting sequence binding (GO:0033328)	2	0	.03	-	< 0.01	1.00E00	1.00E00
MH1 domain binding (GO:0035501)	1	0	.02	-	< 0.01	1.00E00	1.00E00
MH2 domain binding (GO:0035500)	2	0	.03	-	< 0.01	1.00E00	1.00E00
phosphopantetheine-dependent carrier activity (GO:0140414)	1	0	.02	-	< 0.01	1.00E00	1.00E00
zinc:bicarbonate symporter activity (GO:0140412)	1	0	.02	-	< 0.01	1.00E00	1.00E00
acylphosphatase activity (GO:0003998)	2	0	.03	-	< 0.01	1.00E00	1.00E00
solute:bicarbonate symporter activity (GO:0140410)	7	0	.11	-	< 0.01	1.00E00	1.00E00
acyl-CoA oxidase activity (GO:0003997)	7	0	.11	-	< 0.01	1.00E00	1.00E00
acyl-CoA dehydrogenase activity (GO:0003995)	12	0	.19	-	< 0.01	1.00E00	1.00E00
alpha-1,6-mannosyltransferase activity (GO:0000009)	2	0	.03	-	< 0.01	1.00E00	1.00E00
acid phosphatase activity (GO:0003993)	9	1	.14	+	7.00	1.46E-01	1.00E00
acetylcholinesterase activity (GO:0003990)	2	0	.03	-	< 0.01	1.00E00	1.00E00
acetyl-CoA carboxylase activity (GO:0003989)	3	0	.05	-	< 0.01	1.00E00	1.00E00
acetate-CoA ligase activity (GO:0003987)	4	0	.06	-	< 0.01	1.00E00	1.00E00
acetolactate synthase activity (GO:0003984)	1	0	.02	-	< 0.01	1.00E00	1.00E00
UTP:glucose-1-phosphate uridylyltransferase activity (GO:0003983)	1	0	.02	-	< 0.01	1.00E00	1.00E00
UDP-glucose:glycoprotein glucosyltransferase activity (GO:0003980)	2	0	.03	-	< 0.01	1.00E00	1.00E00
nucleobase-containing compound transmembrane transporter activity (GO:0015932)	50	1	.79	+	1.26	5.53E-01	1.00E00
UDP-glucose 6-dehydrogenase activity (GO:0003979)	1	0	.02	-	< 0.01	1.00E00	1.00E00
UDP-glucose 4-epimerase activity (GO:0003978)	1	0	.02	-	< 0.01	1.00E00	1.00E00
UDP-N-acetylglucosamine diphosphorylase activity (GO:0003977)	2	0	.03	-	< 0.01	1.00E00	1.00E00
alpha-(1,2)-fucosyltransferase activity (GO:0031127)	2	0	.03	-	< 0.01	1.00E00	1.00E00
dehydroascorbic acid transmembrane transporter activity (GO:0033300)	8	0	.13	-	< 0.01	1.00E00	1.00E00
UDP-N-acetylglucosamine 4-epimerase activity (GO:0003974)	1	0	.02	-	< 0.01	1.00E00	1.00E00
(S)-2-hydroxy-acid oxidase activity (GO:0003973)	3	0	.05	-	< 0.01	1.00E00	1.00E00
RNA ligase (ATP) activity (GO:0003972)	1	0	.02	-	< 0.01	1.00E00	1.00E00
hexosaminidase activity (GO:0015929)	15	0	.24	-	< 0.01	1.00E00	1.00E00
fucosidase activity (GO:0015928)	2	0	.03	-	< 0.01	1.00E00	1.00E00
polymeric immunoglobulin receptor activity (GO:0001792)	1	0	.02	-	< 0.01	1.00E00	1.00E00
trehalase activity (GO:0015927)	1	0	.02	-	< 0.01	1.00E00	1.00E00
IgM binding (GO:0001791)	2	0	.03	-	< 0.01	1.00E00	1.00E00
glucosidase activity (GO:0015926)	15	0	.24	-	< 0.01	1.00E00	1.00E00
galactosidase activity (GO:0015925)	7	0	.11	-	< 0.01	1.00E00	1.00E00
aspartate oxidase activity (GO:0015922)	1	0	.02	-	< 0.01	1.00E00	1.00E00
RNA-directed 5'-3' RNA polymerase activity (GO:0003968)	2	0	.03	-	< 0.01	1.00E00	1.00E00
RNA-directed DNA polymerase activity (GO:0003964)	17	0	.27	-	< 0.01	1.00E00	1.00E00
RNA-3'-phosphate cyclase activity (GO:0003963)	1	0	.02	-	< 0.01	1.00E00	1.00E00
NADPH:quinone reductase activity (GO:0003960)	4	0	.06	-	< 0.01	1.00E00	1.00E00
phosphatidylserine binding (GO:0001786)	60	1	.95	+	1.05	6.18E-01	1.00E00
prostaglandin J receptor activity (GO:0001785)	1	0	.02	-	< 0.01	1.00E00	1.00E00
phosphotyrosine residue binding (GO:0001784)	44	1	.70	+	1.43	5.08E-01	1.00E00
large conductance calcium-activated potassium channel activity (GO:0060072)	1	0	.02	-	< 0.01	1.00E00	1.00E00
RNA polymerase activity (GO:0097747)	42	0	.67	-	< 0.01	1.00E00	1.00E00
steryl-beta-glucosidase activity (GO:0050295)	2	0	.03	-	< 0.01	1.00E00	1.00E00
steroid sulfotransferase activity (GO:0050294)	4	0	.06	-	< 0.01	1.00E00	1.00E00
sphingosine N-acyltransferase activity (GO:0050291)	7	0	.11	-	< 0.01	1.00E00	1.00E00
sphingomyelin phosphodiesterase D activity (GO:0050290)	1	0	.02	-	< 0.01	1.00E00	1.00E00
NADPH-hemoprotein reductase activity (GO:0003958)	3	0	.05	-	< 0.01	1.00E00	1.00E00
NAD(P)+ transhydrogenase (B-specific) activity (GO:0003957)	1	0	.02	-	< 0.01	1.00E00	1.00E00
NAD(P)+-protein-arginine ADP-ribosyltransferase activity (GO:0003956)	6	0	.10	-	< 0.01	1.00E00	1.00E00
NAD(P)H dehydrogenase (quinone) activity (GO:0003955)	46	1	.73	+	1.37	5.23E-01	1.00E00
NADH dehydrogenase activity (GO:0003954)	45	1	.71	+	1.40	5.16E-01	1.00E00
NAD+ nucleosidase activity (GO:0003953)	16	0	.25	-	< 0.01	1.00E00	1.00E00
NAD+ synthase (glutamine-hydrolyzing) activity (GO:0003952)	1	0	.02	-	< 0.01	1.00E00	1.00E00
NAD+ kinase activity (GO:0003951)	17	0	.27	-	< 0.01	1.00E00	1.00E00
NAD+ ADP-ribosyltransferase activity (GO:0003950)	25	0	.40	-	< 0.01	1.00E00	1.00E00
N4-(beta-N-acetylglucosaminyl)-L-asparaginase activity (GO:0003948)	1	0	.02	-	< 0.01	1.00E00	1.00E00
(N-acetylneuraminyl)-galactosylglucosylceramide N-acetylgalactosaminyltransferase activity (GO:0003947)	1	0	.02	-	< 0.01	1.00E00	1.00E00
N-acetyllactosamine synthase activity (GO:0003945)	5	0	.08	-	< 0.01	1.00E00	1.00E00
N-acetylglucosamine-1-phosphodiester alpha-N-acetylglucosaminidase activity (GO:0003944)	1	0	.02	-	< 0.01	1.00E00	1.00E00
N-acetylgalactosamine-4-sulfatase activity (GO:0003943)	2	0	.03	-	< 0.01	1.00E00	1.00E00
L-serine ammonia-lyase activity (GO:0003941)	3	0	.05	-	< 0.01	1.00E00	1.00E00
L-iduronidase activity (GO:0003940)	1	0	.02	-	< 0.01	1.00E00	1.00E00
aminocarboxymuconate-semialdehyde decarboxylase activity (GO:0001760)	1	0	.02	-	< 0.01	1.00E00	1.00E00
LEM domain binding (GO:0097726)	1	0	.02	-	< 0.01	1.00E00	1.00E00
sedoheptulokinase activity (GO:0050277)	1	0	.02	-	< 0.01	1.00E00	1.00E00
protein-fructosamine 3-kinase activity (GO:0102194)	1	0	.02	-	< 0.01	1.00E00	1.00E00
protein-ribulosamine 3-kinase activity (GO:0102193)	2	0	.03	-	< 0.01	1.00E00	1.00E00
IMP dehydrogenase activity (GO:0003938)	3	0	.05	-	< 0.01	1.00E00	1.00E00
IMP cyclohydrolase activity (GO:0003937)	1	0	.02	-	< 0.01	1.00E00	1.00E00
GTP cyclohydrolase I activity (GO:0003934)	1	0	.02	-	< 0.01	1.00E00	1.00E00
GTP cyclohydrolase activity (GO:0003933)	1	0	.02	-	< 0.01	1.00E00	1.00E00
palmitoyl-CoA 9-desaturase activity (GO:0032896)	1	0	.02	-	< 0.01	1.00E00	1.00E00
retinal dehydrogenase activity (GO:0001758)	8	0	.13	-	< 0.01	1.00E00	1.00E00
neuropilin binding (GO:0038191)	5	0	.08	-	< 0.01	1.00E00	1.00E00
disordered domain specific binding (GO:0097718)	37	2	.59	+	3.40	1.24E-01	1.00E00
RNA uridylyltransferase activity (GO:0050265)	3	0	.05	-	< 0.01	1.00E00	1.00E00
ribosylnicotinamide kinase activity (GO:0050262)	2	0	.03	-	< 0.01	1.00E00	1.00E00
mRNA binding involved in posttranscriptional gene silencing (GO:1903231)	3	0	.05	-	< 0.01	1.00E00	1.00E00
pattern recognition receptor activity (GO:0038187)	25	0	.40	-	< 0.01	1.00E00	1.00E00
peroxynitrite isomerase activity (GO:0062213)	1	0	.02	-	< 0.01	1.00E00	1.00E00
GPI-anchor transamidase activity (GO:0003923)	2	0	.03	-	< 0.01	1.00E00	1.00E00
lithocholic acid receptor activity (GO:0038186)	1	0	.02	-	< 0.01	1.00E00	1.00E00
GMP synthase (glutamine-hydrolyzing) activity (GO:0003922)	1	0	.02	-	< 0.01	1.00E00	1.00E00
GMP synthase activity (GO:0003921)	1	0	.02	-	< 0.01	1.00E00	1.00E00
GMP reductase activity (GO:0003920)	2	0	.03	-	< 0.01	1.00E00	1.00E00
G protein-coupled bile acid receptor activity (GO:0038182)	1	0	.02	-	< 0.01	1.00E00	1.00E00
bile acid receptor activity (GO:0038181)	3	0	.05	-	< 0.01	1.00E00	1.00E00
rhodopsin kinase activity (GO:0050254)	3	0	.05	-	< 0.01	1.00E00	1.00E00
MHC class II protein binding, via antigen binding groove (GO:0042658)	1	0	.02	-	< 0.01	1.00E00	1.00E00
retinyl-palmitate esterase activity (GO:0050253)	4	0	.06	-	< 0.01	1.00E00	1.00E00
retinol O-fatty-acyltransferase activity (GO:0050252)	3	0	.05	-	< 0.01	1.00E00	1.00E00
retinol isomerase activity (GO:0050251)	2	0	.03	-	< 0.01	1.00E00	1.00E00
3-beta-hydroxysteroid dehydrogenase/C4-decarboxylase activity (GO:0102175)	1	0	.02	-	< 0.01	1.00E00	1.00E00
FMN adenylyltransferase activity (GO:0003919)	1	0	.02	-	< 0.01	1.00E00	1.00E00
DNA topoisomerase type II (double strand cut, ATP-hydrolyzing) activity (GO:0003918)	3	0	.05	-	< 0.01	1.00E00	1.00E00
DNA topoisomerase type I (single strand cut, ATP-independent) activity (GO:0003917)	4	0	.06	-	< 0.01	1.00E00	1.00E00
DNA topoisomerase activity (GO:0003916)	7	0	.11	-	< 0.01	1.00E00	1.00E00
death receptor agonist activity (GO:0038177)	2	0	.03	-	< 0.01	1.00E00	1.00E00
DNA nucleotidylexotransferase activity (GO:0003912)	1	0	.02	-	< 0.01	1.00E00	1.00E00
DNA ligase (ATP) activity (GO:0003910)	4	0	.06	-	< 0.01	1.00E00	1.00E00
prenylcysteine oxidase activity (GO:0001735)	2	0	.03	-	< 0.01	1.00E00	1.00E00
mRNA (N6-adenosine)-methyltransferase activity (GO:0001734)	2	0	.03	-	< 0.01	1.00E00	1.00E00
galactosylceramide sulfotransferase activity (GO:0001733)	4	0	.06	-	< 0.01	1.00E00	1.00E00
S-adenosylmethionine-dependent tRNA (m5U54) methyltransferase activity (GO:0030697)	1	0	.02	-	< 0.01	1.00E00	1.00E00
tRNA (m5U54) methyltransferase activity (GO:0030696)	1	0	.02	-	< 0.01	1.00E00	1.00E00
GTPase regulator activity (GO:0030695)	494	7	7.84	-	.89	1.00E00	1.00E00
2'-5'-oligoadenylate synthetase activity (GO:0001730)	4	0	.06	-	< 0.01	1.00E00	1.00E00
[protein]-3-O-(N-acetyl-D-glucosaminyl)-L-serine O-N-acetyl-alpha-D-glucosaminase activity (GO:0102167)	1	0	.02	-	< 0.01	1.00E00	1.00E00
[protein]-3-O-(N-acetyl-D-glucosaminyl)-L-threonine O-N-acetyl-alpha-D-glucosaminase activity (GO:0102166)	1	0	.02	-	< 0.01	1.00E00	1.00E00
DNA ligase activity (GO:0003909)	4	0	.06	-	< 0.01	1.00E00	1.00E00
methylated-DNA-[protein]-cysteine S-methyltransferase activity (GO:0003908)	1	0	.02	-	< 0.01	1.00E00	1.00E00
DNA-(apurinic or apyrimidinic site) endonuclease activity (GO:0003906)	13	0	.21	-	< 0.01	1.00E00	1.00E00
alkylbase DNA N-glycosylase activity (GO:0003905)	1	0	.02	-	< 0.01	1.00E00	1.00E00
ceramide kinase activity (GO:0001729)	2	0	.03	-	< 0.01	1.00E00	1.00E00
thrombopoietin receptor activity (GO:0038164)	1	0	.02	-	< 0.01	1.00E00	1.00E00
lipid kinase activity (GO:0001727)	6	0	.10	-	< 0.01	1.00E00	1.00E00
very-long-chain 3-hydroxyacyl-CoA dehydratase activity (GO:0102158)	4	0	.06	-	< 0.01	1.00E00	1.00E00
L-amino-acid oxidase activity (GO:0001716)	1	0	.02	-	< 0.01	1.00E00	1.00E00
plus-end directed microfilament motor activity (GO:0060002)	3	0	.05	-	< 0.01	1.00E00	1.00E00
minus-end directed microfilament motor activity (GO:0060001)	1	0	.02	-	< 0.01	1.00E00	1.00E00
N-acetyl-beta-D-galactosaminidase activity (GO:0102148)	3	0	.05	-	< 0.01	1.00E00	1.00E00
ATPase-coupled transmembrane transporter activity (GO:0042626)	120	3	1.91	+	1.57	4.45E-01	1.00E00
prostaglandin-E2 9-reductase activity (GO:0050221)	1	0	.02	-	< 0.01	1.00E00	1.00E00
prostaglandin-E synthase activity (GO:0050220)	3	0	.05	-	< 0.01	1.00E00	1.00E00
heparan sulfate N-deacetylase activity (GO:0102140)	2	0	.03	-	< 0.01	1.00E00	1.00E00
C-X-C motif chemokine 12 receptor activity (GO:0038147)	1	0	.02	-	< 0.01	1.00E00	1.00E00
calcitonin binding (GO:0032841)	1	0	.02	-	< 0.01	1.00E00	1.00E00
propionate-CoA ligase activity (GO:0050218)	4	0	.06	-	< 0.01	1.00E00	1.00E00
progesterone 5-alpha-reductase activity (GO:0050213)	1	0	.02	-	< 0.01	1.00E00	1.00E00
procollagen galactosyltransferase activity (GO:0050211)	3	0	.05	-	< 0.01	1.00E00	1.00E00
cyclic pyranopterin monophosphate synthase activity (GO:0061799)	1	0	.02	-	< 0.01	1.00E00	1.00E00
GTP 3',8'-cyclase activity (GO:0061798)	1	0	.02	-	< 0.01	1.00E00	1.00E00
neuregulin binding (GO:0038132)	5	0	.08	-	< 0.01	1.00E00	1.00E00
pH-gated chloride channel activity (GO:0061797)	1	0	.02	-	< 0.01	1.00E00	1.00E00
neuregulin receptor activity (GO:0038131)	2	0	.03	-	< 0.01	1.00E00	1.00E00
plasmanylethanolamine desaturase activity (GO:0050207)	1	0	.02	-	< 0.01	1.00E00	1.00E00
fucokinase activity (GO:0050201)	1	0	.02	-	< 0.01	1.00E00	1.00E00
plasmalogen synthase activity (GO:0050200)	2	0	.03	-	< 0.01	1.00E00	1.00E00
UFM1 transferase activity (GO:0071568)	2	0	.03	-	< 0.01	1.00E00	1.00E00
UFM1 hydrolase activity (GO:0071567)	1	0	.02	-	< 0.01	1.00E00	1.00E00
riboflavin reductase (NADPH) activity (GO:0042602)	1	0	.02	-	< 0.01	1.00E00	1.00E00
UFM1 activating enzyme activity (GO:0071566)	1	0	.02	-	< 0.01	1.00E00	1.00E00
ceramidase activity (GO:0102121)	6	0	.10	-	< 0.01	1.00E00	1.00E00
beta-aspartyl-peptidase activity (GO:0008798)	2	0	.03	-	< 0.01	1.00E00	1.00E00
bis(5'-nucleosyl)-tetraphosphatase activity (GO:0008796)	2	0	.03	-	< 0.01	1.00E00	1.00E00
C-C motif chemokine 21 receptor activity (GO:0038121)	1	0	.02	-	< 0.01	1.00E00	1.00E00
arsenate reductase (glutaredoxin) activity (GO:0008794)	1	0	.02	-	< 0.01	1.00E00	1.00E00
peptidoglycan muralytic activity (GO:0061783)	13	0	.21	-	< 0.01	1.00E00	1.00E00
arginine decarboxylase activity (GO:0008792)	1	0	.02	-	< 0.01	1.00E00	1.00E00
laurate hydroxylase activity (GO:0102116)	1	0	.02	-	< 0.01	1.00E00	1.00E00
histone demethylase activity (H3-K27 specific) (GO:0071558)	5	0	.08	-	< 0.01	1.00E00	1.00E00
hypoxia-inducible factor-asparagine oxygenase activity (GO:0102113)	1	0	.02	-	< 0.01	1.00E00	1.00E00
G protein-coupled pyrimidinergic nucleotide receptor activity (GO:0071553)	3	0	.05	-	< 0.01	1.00E00	1.00E00
C-C motif chemokine 19 receptor activity (GO:0038117)	1	0	.02	-	< 0.01	1.00E00	1.00E00
alkyl hydroperoxide reductase activity (GO:0008785)	1	0	.02	-	< 0.01	1.00E00	1.00E00
sterol response element binding (GO:0032810)	2	0	.03	-	< 0.01	1.00E00	1.00E00
agmatinase activity (GO:0008783)	1	0	.02	-	< 0.01	1.00E00	1.00E00
N-acylneuraminate cytidylyltransferase activity (GO:0008781)	2	0	.03	-	< 0.01	1.00E00	1.00E00
translation elongation factor binding (GO:0061770)	1	0	.02	-	< 0.01	1.00E00	1.00E00
protein carboxyl O-methyltransferase activity (GO:0051998)	6	0	.10	-	< 0.01	1.00E00	1.00E00
2-oxo-4-hydroxy-4-carboxy-5-ureidoimidazoline decarboxylase activity (GO:0051997)	1	0	.02	-	< 0.01	1.00E00	1.00E00
squalene synthase activity (GO:0051996)	1	0	.02	-	< 0.01	1.00E00	1.00E00
(R)-2-hydroxyglutarate dehydrogenase activity (GO:0051990)	1	0	.02	-	< 0.01	1.00E00	1.00E00
homocarnosine synthase activity (GO:0102102)	1	0	.02	-	< 0.01	1.00E00	1.00E00
choriogonadotropin hormone binding (GO:0038106)	1	0	.02	-	< 0.01	1.00E00	1.00E00
ribosylnicotinate kinase activity (GO:0061769)	2	0	.03	-	< 0.01	1.00E00	1.00E00
magnesium:sodium antiporter activity (GO:0061768)	1	0	.02	-	< 0.01	1.00E00	1.00E00
activin receptor antagonist activity (GO:0038102)	2	0	.03	-	< 0.01	1.00E00	1.00E00
U6 snRNA 3'-end binding (GO:0030629)	2	0	.03	-	< 0.01	1.00E00	1.00E00
acetate CoA-transferase activity (GO:0008775)	1	0	.02	-	< 0.01	1.00E00	1.00E00
pre-mRNA 3'-splice site binding (GO:0030628)	7	0	.11	-	< 0.01	1.00E00	1.00E00
nodal binding (GO:0038100)	5	0	.08	-	< 0.01	1.00E00	1.00E00
pre-mRNA 5'-splice site binding (GO:0030627)	1	0	.02	-	< 0.01	1.00E00	1.00E00
U12 snRNA binding (GO:0030626)	2	0	.03	-	< 0.01	1.00E00	1.00E00
U6atac snRNA binding (GO:0030624)	1	0	.02	-	< 0.01	1.00E00	1.00E00
U5 snRNA binding (GO:0030623)	2	0	.03	-	< 0.01	1.00E00	1.00E00
U4atac snRNA binding (GO:0030622)	3	0	.05	-	< 0.01	1.00E00	1.00E00
U4 snRNA binding (GO:0030621)	6	0	.10	-	< 0.01	1.00E00	1.00E00
U2 snRNA binding (GO:0030620)	6	0	.10	-	< 0.01	1.00E00	1.00E00
methanethiol oxidase activity (GO:0018549)	1	0	.02	-	< 0.01	1.00E00	1.00E00
RING-like zinc finger domain binding (GO:0071535)	4	0	.06	-	< 0.01	1.00E00	1.00E00
UDP-sugar diphosphatase activity (GO:0008768)	2	0	.03	-	< 0.01	1.00E00	1.00E00
activin receptor activity, type II (GO:0016362)	2	0	.03	-	< 0.01	1.00E00	1.00E00
activin receptor activity, type I (GO:0016361)	5	0	.08	-	< 0.01	1.00E00	1.00E00
U1 snRNA binding (GO:0030619)	8	0	.13	-	< 0.01	1.00E00	1.00E00
telomeric repeat-containing RNA binding (GO:0061752)	2	0	.03	-	< 0.01	1.00E00	1.00E00
UDP-N-acetylglucosamine 2-epimerase activity (GO:0008761)	1	0	.02	-	< 0.01	1.00E00	1.00E00
oxidoreductase activity, acting on phosphorus or arsenic in donors, disulfide as acceptor (GO:0030614)	3	0	.05	-	< 0.01	1.00E00	1.00E00
neutral sphingomyelin phosphodiesterase activity (GO:0061751)	1	0	.02	-	< 0.01	1.00E00	1.00E00
oxidoreductase activity, acting on phosphorus or arsenic in donors (GO:0030613)	3	0	.05	-	< 0.01	1.00E00	1.00E00
acid sphingomyelin phosphodiesterase activity (GO:0061750)	1	0	.02	-	< 0.01	1.00E00	1.00E00
arsenate reductase activity (GO:0030611)	1	0	.02	-	< 0.01	1.00E00	1.00E00
lysophospholipid:sodium symporter activity (GO:0051978)	1	0	.02	-	< 0.01	1.00E00	1.00E00
calcium-independent phospholipase A2 activity (GO:0047499)	8	0	.13	-	< 0.01	1.00E00	1.00E00
calcium-dependent phospholipase A2 activity (GO:0047498)	16	0	.25	-	< 0.01	1.00E00	1.00E00
ceramide cholinephosphotransferase activity (GO:0047493)	3	0	.05	-	< 0.01	1.00E00	1.00E00
forked DNA-dependent helicase activity (GO:0061749)	2	0	.03	-	< 0.01	1.00E00	1.00E00
S-adenosylmethionine-dependent methyltransferase activity (GO:0008757)	160	1	2.54	-	.39	5.25E-01	1.00E00
histidine decarboxylase activity (GO:0004398)	1	0	.02	-	< 0.01	1.00E00	1.00E00
histidine ammonia-lyase activity (GO:0004397)	1	0	.02	-	< 0.01	1.00E00	1.00E00
hexokinase activity (GO:0004396)	6	0	.10	-	< 0.01	1.00E00	1.00E00
hexaprenyldihydroxybenzoate methyltransferase activity (GO:0004395)	1	0	.02	-	< 0.01	1.00E00	1.00E00
heparan sulfate 2-O-sulfotransferase activity (GO:0004394)	1	0	.02	-	< 0.01	1.00E00	1.00E00
heme oxygenase (decyclizing) activity (GO:0004392)	2	0	.03	-	< 0.01	1.00E00	1.00E00
MCM complex binding (GO:1904931)	1	0	.02	-	< 0.01	1.00E00	1.00E00
N-acetylneuraminate lyase activity (GO:0008747)	1	0	.02	-	< 0.01	1.00E00	1.00E00
NAD(P)+ transhydrogenase activity (GO:0008746)	1	0	.02	-	< 0.01	1.00E00	1.00E00
N-acetylmuramoyl-L-alanine amidase activity (GO:0008745)	4	0	.06	-	< 0.01	1.00E00	1.00E00
L-threonine 3-dehydrogenase activity (GO:0008743)	1	0	.02	-	< 0.01	1.00E00	1.00E00
peptide-lysine-N-acetyltransferase activity (GO:0061733)	45	0	.71	-	< 0.01	1.00E00	1.00E00
ribonucleoside-diphosphate reductase activity (GO:0061731)	3	0	.05	-	< 0.01	1.00E00	1.00E00
helicase activity (GO:0004386)	159	4	2.52	+	1.58	3.27E-01	1.00E00
guanylate kinase activity (GO:0004385)	9	0	.14	-	< 0.01	1.00E00	1.00E00
coreceptor activity involved in canonical Wnt signaling pathway (GO:1904928)	3	0	.05	-	< 0.01	1.00E00	1.00E00
guanylate cyclase activity (GO:0004383)	9	0	.14	-	< 0.01	1.00E00	1.00E00
gap junction hemi-channel activity (GO:0055077)	3	0	.05	-	< 0.01	1.00E00	1.00E00
guanosine-diphosphatase activity (GO:0004382)	9	0	.14	-	< 0.01	1.00E00	1.00E00
fucosylgalactoside 3-alpha-galactosyltransferase activity (GO:0004381)	1	0	.02	-	< 0.01	1.00E00	1.00E00
glycoprotein-fucosylgalactoside alpha-N-acetylgalactosaminyltransferase activity (GO:0004380)	1	0	.02	-	< 0.01	1.00E00	1.00E00
gamma-catenin binding (GO:0045295)	12	1	.19	+	5.25	1.85E-01	1.00E00
alpha-catenin binding (GO:0045294)	11	1	.17	+	5.73	1.72E-01	1.00E00
glycylpeptide N-tetradecanoyltransferase activity (GO:0004379)	2	0	.03	-	< 0.01	1.00E00	1.00E00
GDP-Man:Man1GlcNAc2-PP-Dol alpha-1,3-mannosyltransferase activity (GO:0004378)	1	0	.02	-	< 0.01	1.00E00	1.00E00
GDP-Man:Man3GlcNAc2-PP-Dol alpha-1,2-mannosyltransferase activity (GO:0004377)	1	0	.02	-	< 0.01	1.00E00	1.00E00
glycolipid mannosyltransferase activity (GO:0004376)	5	0	.08	-	< 0.01	1.00E00	1.00E00
glycogen (starch) synthase activity (GO:0004373)	3	0	.05	-	< 0.01	1.00E00	1.00E00
glycerone kinase activity (GO:0004371)	1	0	.02	-	< 0.01	1.00E00	1.00E00
glycerol kinase activity (GO:0004370)	4	0	.06	-	< 0.01	1.00E00	1.00E00
Ser-tRNA(Ala) hydrolase activity (GO:0002196)	2	0	.03	-	< 0.01	1.00E00	1.00E00
heparosan-N-sulfate-glucuronate 5-epimerase activity (GO:0047464)	1	0	.02	-	< 0.01	1.00E00	1.00E00
DNA-3-methyladenine glycosylase activity (GO:0008725)	1	0	.02	-	< 0.01	1.00E00	1.00E00
folic acid receptor activity (GO:0061714)	2	0	.03	-	< 0.01	1.00E00	1.00E00
tRNA (N(6)-L-threonylcarbamoyladenosine(37)-C(2))-methylthiotransferase (GO:0061712)	1	0	.02	-	< 0.01	1.00E00	1.00E00
D-serine ammonia-lyase activity (GO:0008721)	1	0	.02	-	< 0.01	1.00E00	1.00E00
N(6)-L-threonylcarbamoyladenine synthase activity (GO:0061711)	2	0	.03	-	< 0.01	1.00E00	1.00E00
glycerol-3-phosphate O-acyltransferase activity (GO:0004366)	4	0	.06	-	< 0.01	1.00E00	1.00E00
glyceraldehyde-3-phosphate dehydrogenase (NAD+) (phosphorylating) activity (GO:0004365)	2	0	.03	-	< 0.01	1.00E00	1.00E00
glutathione transferase activity (GO:0004364)	27	1	.43	+	2.33	3.57E-01	1.00E00
D-glucose transmembrane transporter activity (GO:0055056)	9	0	.14	-	< 0.01	1.00E00	1.00E00
glutaryl-CoA dehydrogenase activity (GO:0004361)	1	0	.02	-	< 0.01	1.00E00	1.00E00
glutamine-fructose-6-phosphate transaminase (isomerizing) activity (GO:0004360)	2	0	.03	-	< 0.01	1.00E00	1.00E00
phosphatidylinositol-3,4-bisphosphate 4-phosphatase activity (GO:0016316)	2	0	.03	-	< 0.01	1.00E00	1.00E00
ATP-dependent NAD(P)H-hydrate dehydratase activity (GO:0047453)	1	0	.02	-	< 0.01	1.00E00	1.00E00
phosphatidylinositol-3,4,5-trisphosphate 3-phosphatase activity (GO:0016314)	5	0	.08	-	< 0.01	1.00E00	1.00E00
tRNA-5-taurinomethyluridine 2-sulfurtransferase (GO:0061708)	1	0	.02	-	< 0.01	1.00E00	1.00E00
inositol bisphosphate phosphatase activity (GO:0016312)	5	0	.08	-	< 0.01	1.00E00	1.00E00
cAMP response element binding (GO:0035497)	16	0	.25	-	< 0.01	1.00E00	1.00E00
glutaminase activity (GO:0004359)	3	0	.05	-	< 0.01	1.00E00	1.00E00
glutamate-cysteine ligase activity (GO:0004357)	2	0	.03	-	< 0.01	1.00E00	1.00E00
glutamate-ammonia ligase activity (GO:0004356)	2	0	.03	-	< 0.01	1.00E00	1.00E00
glutamate dehydrogenase (NADP+) activity (GO:0004354)	2	0	.03	-	< 0.01	1.00E00	1.00E00
glutamate dehydrogenase [NAD(P)+] activity (GO:0004353)	2	0	.03	-	< 0.01	1.00E00	1.00E00
glutamate dehydrogenase (NAD+) activity (GO:0004352)	2	0	.03	-	< 0.01	1.00E00	1.00E00
glutamate decarboxylase activity (GO:0004351)	2	0	.03	-	< 0.01	1.00E00	1.00E00
glutamate-5-semialdehyde dehydrogenase activity (GO:0004350)	1	0	.02	-	< 0.01	1.00E00	1.00E00
1-phosphatidylinositol-5-phosphate 4-kinase activity (GO:0016309)	3	0	.05	-	< 0.01	1.00E00	1.00E00
1-phosphatidylinositol-4-phosphate 5-kinase activity (GO:0016308)	8	0	.13	-	< 0.01	1.00E00	1.00E00
phosphatidylinositol phosphate kinase activity (GO:0016307)	16	0	.25	-	< 0.01	1.00E00	1.00E00
N-acylneuraminate-9-phosphate synthase activity (GO:0047444)	1	0	.02	-	< 0.01	1.00E00	1.00E00
17-alpha-hydroxyprogesterone aldolase activity (GO:0047442)	1	0	.02	-	< 0.01	1.00E00	1.00E00
cholate 7-alpha-dehydrogenase activity (GO:0008709)	1	0	.02	-	< 0.01	1.00E00	1.00E00
1-phosphatidylinositol-3-kinase activity (GO:0016303)	10	0	.16	-	< 0.01	1.00E00	1.00E00
kinase activity (GO:0016301)	764	14	12.13	+	1.15	5.55E-01	1.00E00
tRNA (uracil) methyltransferase activity (GO:0016300)	4	0	.06	-	< 0.01	1.00E00	1.00E00
methionine synthase activity (GO:0008705)	1	0	.02	-	< 0.01	1.00E00	1.00E00
4-hydroxy-2-oxoglutarate aldolase activity (GO:0008700)	1	0	.02	-	< 0.01	1.00E00	1.00E00
glutamate 5-kinase activity (GO:0004349)	1	0	.02	-	< 0.01	1.00E00	1.00E00
adenine/guanine mispair binding (GO:0035485)	1	0	.02	-	< 0.01	1.00E00	1.00E00
granulocyte colony-stimulating factor binding (GO:0051916)	2	0	.03	-	< 0.01	1.00E00	1.00E00
glucosylceramidase activity (GO:0004348)	3	0	.05	-	< 0.01	1.00E00	1.00E00
glucose-6-phosphatase activity (GO:0004346)	3	0	.05	-	< 0.01	1.00E00	1.00E00
glucose dehydrogenase activity (GO:0004344)	1	0	.02	-	< 0.01	1.00E00	1.00E00
glucosamine 6-phosphate N-acetyltransferase activity (GO:0004343)	1	0	.02	-	< 0.01	1.00E00	1.00E00
glucosamine-6-phosphate deaminase activity (GO:0004342)	2	0	.03	-	< 0.01	1.00E00	1.00E00
gluconolactonase activity (GO:0004341)	1	0	.02	-	< 0.01	1.00E00	1.00E00
glucokinase activity (GO:0004340)	6	0	.10	-	< 0.01	1.00E00	1.00E00
dystroglycan binding (GO:0002162)	10	1	.16	+	6.30	1.59E-01	1.00E00
aminoacyl-tRNA editing activity (GO:0002161)	13	0	.21	-	< 0.01	1.00E00	1.00E00
chylomicron binding (GO:0035478)	1	0	.02	-	< 0.01	1.00E00	1.00E00
double-stranded DNA 5'-3' exodeoxyribonuclease activity (GO:0051908)	1	0	.02	-	< 0.01	1.00E00	1.00E00
glucan 1,4-alpha-glucosidase activity (GO:0004339)	2	0	.03	-	< 0.01	1.00E00	1.00E00
lipase binding (GO:0035473)	6	0	.10	-	< 0.01	1.00E00	1.00E00
galactosylceramidase activity (GO:0004336)	2	0	.03	-	< 0.01	1.00E00	1.00E00
choriogonadotropin hormone receptor activity (GO:0035472)	1	0	.02	-	< 0.01	1.00E00	1.00E00
galactokinase activity (GO:0004335)	2	0	.03	-	< 0.01	1.00E00	1.00E00
fumarate hydratase activity (GO:0004333)	1	0	.02	-	< 0.01	1.00E00	1.00E00
fructose-2,6-bisphosphate 2-phosphatase activity (GO:0004331)	5	0	.08	-	< 0.01	1.00E00	1.00E00
nucleoside-triphosphate diphosphatase activity (GO:0047429)	11	0	.17	-	< 0.01	1.00E00	1.00E00
monocarboxylic acid binding (GO:0033293)	73	3	1.16	+	2.59	1.16E-01	1.00E00
steroid receptor RNA activator RNA binding (GO:0002153)	2	0	.03	-	< 0.01	1.00E00	1.00E00
G-quadruplex RNA binding (GO:0002151)	6	0	.10	-	< 0.01	1.00E00	1.00E00
formate-tetrahydrofolate ligase activity (GO:0004329)	2	0	.03	-	< 0.01	1.00E00	1.00E00
tetrahydrofolylpolyglutamate synthase activity (GO:0004326)	1	0	.02	-	< 0.01	1.00E00	1.00E00
ferrochelatase activity (GO:0004325)	1	0	.02	-	< 0.01	1.00E00	1.00E00
immune receptor activity (GO:0140375)	137	2	2.18	-	.92	1.00E00	1.00E00
ferredoxin-NADP+ reductase activity (GO:0004324)	1	0	.02	-	< 0.01	1.00E00	1.00E00
ferroxidase activity (GO:0004322)	9	1	.14	+	7.00	1.46E-01	1.00E00
ATPase-coupled monocarboxylic acid transmembrane transporter activity (GO:0033285)	4	0	.06	-	< 0.01	1.00E00	1.00E00
fatty-acyl-CoA synthase activity (GO:0004321)	7	0	.11	-	< 0.01	1.00E00	1.00E00
ATPase-coupled carboxylic acid transmembrane transporter activity (GO:0033284)	4	0	.06	-	< 0.01	1.00E00	1.00E00
N-acetylgalactosamine-6-phosphate deacetylase activity (GO:0047419)	1	0	.02	-	< 0.01	1.00E00	1.00E00
ATPase-coupled organic acid transmembrane transporter activity (GO:0033283)	4	0	.06	-	< 0.01	1.00E00	1.00E00
N-(long-chain-acyl)ethanolamine deacylase activity (GO:0047412)	1	0	.02	-	< 0.01	1.00E00	1.00E00
CXCR1 chemokine receptor binding (GO:0045237)	1	0	.02	-	< 0.01	1.00E00	1.00E00
CXCR chemokine receptor binding (GO:0045236)	18	0	.29	-	< 0.01	1.00E00	1.00E00
endoribonuclease activity, cleaving miRNA-paired mRNA (GO:0090624)	2	0	.03	-	< 0.01	1.00E00	1.00E00
fatty acid synthase activity (GO:0004312)	13	1	.21	+	4.84	1.98E-01	1.00E00
farnesyltranstransferase activity (GO:0004311)	3	0	.05	-	< 0.01	1.00E00	1.00E00
alkenylglycerophosphoethanolamine hydrolase activity (GO:0047409)	2	0	.03	-	< 0.01	1.00E00	1.00E00
farnesyl-diphosphate farnesyltransferase activity (GO:0004310)	1	0	.02	-	< 0.01	1.00E00	1.00E00
alkenylglycerophosphocholine hydrolase activity (GO:0047408)	2	0	.03	-	< 0.01	1.00E00	1.00E00
cyclic-GMP-AMP transmembrane transporter activity (GO:0140360)	2	0	.03	-	< 0.01	1.00E00	1.00E00
CTP binding (GO:0002135)	1	0	.02	-	< 0.01	1.00E00	1.00E00
UTP binding (GO:0002134)	2	0	.03	-	< 0.01	1.00E00	1.00E00
protein-glucosylgalactosylhydroxylysine glucosidase activity (GO:0047402)	1	0	.02	-	< 0.01	1.00E00	1.00E00
single-stranded telomeric DNA binding (GO:0043047)	12	0	.19	-	< 0.01	1.00E00	1.00E00
exopolyphosphatase activity (GO:0004309)	5	0	.08	-	< 0.01	1.00E00	1.00E00
ABC-type transporter activity (GO:0140359)	32	0	.51	-	< 0.01	1.00E00	1.00E00
exo-alpha-sialidase activity (GO:0004308)	5	0	.08	-	< 0.01	1.00E00	1.00E00
P-type transmembrane transporter activity (GO:0140358)	23	1	.37	+	2.74	3.15E-01	1.00E00
ethanolaminephosphotransferase activity (GO:0004307)	3	0	.05	-	< 0.01	1.00E00	1.00E00
ethanolamine-phosphate cytidylyltransferase activity (GO:0004306)	1	0	.02	-	< 0.01	1.00E00	1.00E00
ethanolamine kinase activity (GO:0004305)	4	0	.06	-	< 0.01	1.00E00	1.00E00
estrone sulfotransferase activity (GO:0004304)	1	0	.02	-	< 0.01	1.00E00	1.00E00
estradiol 17-beta-dehydrogenase activity (GO:0004303)	19	0	.30	-	< 0.01	1.00E00	1.00E00
choline binding (GO:0033265)	4	0	.06	-	< 0.01	1.00E00	1.00E00
glycosylceramide flippase activity (GO:0140351)	3	0	.05	-	< 0.01	1.00E00	1.00E00
enoyl-CoA hydratase activity (GO:0004300)	10	0	.16	-	< 0.01	1.00E00	1.00E00
chromatin insulator sequence binding (GO:0043035)	5	0	.08	-	< 0.01	1.00E00	1.00E00
cyclic-di-GMP binding (GO:0035438)	1	0	.02	-	< 0.01	1.00E00	1.00E00
alpha-1,3-glucosidase activity (GO:0090600)	1	0	.02	-	< 0.01	1.00E00	1.00E00
lysophosphatidylcholine flippase activity (GO:0140348)	1	0	.02	-	< 0.01	1.00E00	1.00E00
N-retinylidene-phosphatidylethanolamine flippase activity (GO:0140347)	1	0	.02	-	< 0.01	1.00E00	1.00E00
phosphatidylserine flippase activity (GO:0140346)	5	0	.08	-	< 0.01	1.00E00	1.00E00
phosphatidylcholine flippase activity (GO:0140345)	5	0	.08	-	< 0.01	1.00E00	1.00E00
triglyceride transfer activity (GO:0140344)	1	0	.02	-	< 0.01	1.00E00	1.00E00
phosphatidylserine transfer activity (GO:0140343)	2	0	.03	-	< 0.01	1.00E00	1.00E00
cerebroside transfer activity (GO:0140340)	1	0	.02	-	< 0.01	1.00E00	1.00E00
interleukin-33 receptor activity (GO:0002114)	2	0	.03	-	< 0.01	1.00E00	1.00E00
histone deacetylase activity (H3-K14 specific) (GO:0031078)	10	0	.16	-	< 0.01	1.00E00	1.00E00
interleukin-33 binding (GO:0002113)	1	0	.02	-	< 0.01	1.00E00	1.00E00
cholesterol 26-hydroxylase activity (GO:0031073)	1	0	.02	-	< 0.01	1.00E00	1.00E00
cysteine desulfurase activity (GO:0031071)	1	0	.02	-	< 0.01	1.00E00	1.00E00
cysteine-type endopeptidase regulator activity involved in apoptotic process (GO:0043028)	41	1	.65	+	1.54	4.84E-01	1.00E00
cysteine-type endopeptidase inhibitor activity involved in apoptotic process (GO:0043027)	22	1	.35	+	2.86	3.04E-01	1.00E00
ribosomal small subunit binding (GO:0043024)	17	0	.27	-	< 0.01	1.00E00	1.00E00
ribosomal large subunit binding (GO:0043023)	14	0	.22	-	< 0.01	1.00E00	1.00E00
ribosome binding (GO:0043022)	68	0	1.08	-	< 0.01	6.30E-01	1.00E00
ribonucleoprotein complex binding (GO:0043021)	151	1	2.40	-	.42	7.35E-01	1.00E00
phosphatidylglycerol transfer activity (GO:0140339)	1	0	.02	-	< 0.01	1.00E00	1.00E00
sphingomyelin transfer activity (GO:0140338)	2	0	.03	-	< 0.01	1.00E00	1.00E00
diacylglyceride transfer activity (GO:0140337)	1	0	.02	-	< 0.01	1.00E00	1.00E00
glycerophospholipid flippase activity (GO:0140333)	13	0	.21	-	< 0.01	1.00E00	1.00E00
gamma-tubulin binding (GO:0043015)	31	0	.49	-	< 0.01	1.00E00	1.00E00
alpha-tubulin binding (GO:0043014)	44	0	.70	-	< 0.01	1.00E00	1.00E00
RNA binding involved in posttranscriptional gene silencing (GO:0150100)	3	0	.05	-	< 0.01	1.00E00	1.00E00
retromer complex binding (GO:1905394)	8	0	.13	-	< 0.01	1.00E00	1.00E00
iron ion transmembrane transporter inhibitor activity (GO:0097690)	1	0	.02	-	< 0.01	1.00E00	1.00E00
floppase activity (GO:0140328)	7	0	.11	-	< 0.01	1.00E00	1.00E00
flippase activity (GO:0140327)	16	0	.25	-	< 0.01	1.00E00	1.00E00
ATPase-coupled intramembrane lipid transporter activity (GO:0140326)	27	0	.43	-	< 0.01	1.00E00	1.00E00
dihydrotestosterone 17-beta-dehydrogenase activity (GO:0035410)	4	0	.06	-	< 0.01	1.00E00	1.00E00
oxidoreductase activity, acting on the CH-NH group of donors, flavin as acceptor (GO:0046997)	2	0	.03	-	< 0.01	1.00E00	1.00E00
ATP-dependent protein binding (GO:0043008)	8	0	.13	-	< 0.01	1.00E00	1.00E00
oxidoreductase activity, acting on X-H and Y-H to form an X-Y bond (GO:0046992)	1	0	.02	-	< 0.01	1.00E00	1.00E00
intracellular phosphatidylinositol-3,5-bisphosphate-sensitive cation channel activity (GO:0097682)	1	0	.02	-	< 0.01	1.00E00	1.00E00
protein transporter activity (GO:0140318)	31	1	.49	+	2.03	3.96E-01	1.00E00
histone kinase activity (H3-T6 specific) (GO:0035403)	2	0	.03	-	< 0.01	1.00E00	1.00E00
cysteine transmembrane transporter activity (GO:0033229)	3	0	.05	-	< 0.01	1.00E00	1.00E00
histone kinase activity (H3-T11 specific) (GO:0035402)	2	0	.03	-	< 0.01	1.00E00	1.00E00
histone kinase activity (H3-Y41 specific) (GO:0035401)	1	0	.02	-	< 0.01	1.00E00	1.00E00
histone tyrosine kinase activity (GO:0035400)	1	0	.02	-	< 0.01	1.00E00	1.00E00
molecular sequestering activity (GO:0140313)	6	0	.10	-	< 0.01	1.00E00	1.00E00
anandamide 14,15 epoxidase activity (GO:0062189)	4	0	.06	-	< 0.01	1.00E00	1.00E00
cargo adaptor activity (GO:0140312)	20	0	.32	-	< 0.01	1.00E00	1.00E00
anandamide 11,12 epoxidase activity (GO:0062188)	3	0	.05	-	< 0.01	1.00E00	1.00E00
protein sequestering activity (GO:0140311)	6	0	.10	-	< 0.01	1.00E00	1.00E00
DNA-directed 5'-3' RNA polymerase activity (GO:0003899)	39	0	.62	-	< 0.01	1.00E00	1.00E00
anandamide 8,9 epoxidase activity (GO:0062187)	3	0	.05	-	< 0.01	1.00E00	1.00E00
anandamide epoxidase activity (GO:0062186)	4	0	.06	-	< 0.01	1.00E00	1.00E00
secalciferol 1-monooxygenase activity (GO:0062185)	1	0	.02	-	< 0.01	1.00E00	1.00E00
DNA primase activity (GO:0003896)	2	0	.03	-	< 0.01	1.00E00	1.00E00
testosterone 16-beta-hydroxylase activity (GO:0062184)	2	0	.03	-	< 0.01	1.00E00	1.00E00
all-trans retinoic acid 18-hydroxylase activity (GO:0062183)	2	0	.03	-	< 0.01	1.00E00	1.00E00
all-trans retinoic acid 4-hydrolase activity (GO:0062182)	1	0	.02	-	< 0.01	1.00E00	1.00E00
1-alpha,25-dihydroxyvitamin D3 23-hydroxylase activity (GO:0062181)	2	0	.03	-	< 0.01	1.00E00	1.00E00
25-hydroxycholecalciferol-23-hydroxylase activity (GO:0062180)	1	0	.02	-	< 0.01	1.00E00	1.00E00
STAT family protein binding (GO:0097677)	9	0	.14	-	< 0.01	1.00E00	1.00E00
tapasin binding (GO:0046980)	1	0	.02	-	< 0.01	1.00E00	1.00E00
intramembrane lipid transporter activity (GO:0140303)	38	2	.60	+	3.31	1.29E-01	1.00E00
vitamin D 23-hydroxylase activity (GO:0062179)	2	0	.03	-	< 0.01	1.00E00	1.00E00
DNA-directed DNA polymerase activity (GO:0003887)	25	0	.40	-	< 0.01	1.00E00	1.00E00
DNA (cytosine-5-)-methyltransferase activity (GO:0003886)	3	0	.05	-	< 0.01	1.00E00	1.00E00
D-amino-acid oxidase activity (GO:0003884)	2	0	.03	-	< 0.01	1.00E00	1.00E00
CTP synthase activity (GO:0003883)	2	0	.03	-	< 0.01	1.00E00	1.00E00
CDP-diacylglycerol-serine O-phosphatidyltransferase activity (GO:0003882)	1	0	.02	-	< 0.01	1.00E00	1.00E00
CDP-diacylglycerol-inositol 3-phosphatidyltransferase activity (GO:0003881)	1	0	.02	-	< 0.01	1.00E00	1.00E00
protein C-terminal carboxyl O-methyltransferase activity (GO:0003880)	2	0	.03	-	< 0.01	1.00E00	1.00E00
TAP2 binding (GO:0046979)	3	0	.05	-	< 0.01	1.00E00	1.00E00
TAP1 binding (GO:0046978)	5	0	.08	-	< 0.01	1.00E00	1.00E00
TAP binding (GO:0046977)	8	0	.13	-	< 0.01	1.00E00	1.00E00
histone methyltransferase activity (H3-K27 specific) (GO:0046976)	4	0	.06	-	< 0.01	1.00E00	1.00E00
histone methyltransferase activity (H3-K36 specific) (GO:0046975)	11	0	.17	-	< 0.01	1.00E00	1.00E00
histone methyltransferase activity (H3-K9 specific) (GO:0046974)	10	0	.16	-	< 0.01	1.00E00	1.00E00
histone acetyltransferase activity (H4-K16 specific) (GO:0046972)	2	0	.03	-	< 0.01	1.00E00	1.00E00
NAD-dependent histone deacetylase activity (H4-K16 specific) (GO:0046970)	1	0	.02	-	< 0.01	1.00E00	1.00E00
ribonuclease P RNA binding (GO:0033204)	10	0	.16	-	< 0.01	1.00E00	1.00E00
ATP adenylyltransferase activity (GO:0003877)	1	0	.02	-	< 0.01	1.00E00	1.00E00
AMP deaminase activity (GO:0003876)	3	0	.05	-	< 0.01	1.00E00	1.00E00
ADP-ribosylarginine hydrolase activity (GO:0003875)	2	0	.03	-	< 0.01	1.00E00	1.00E00
6-pyruvoyltetrahydropterin synthase activity (GO:0003874)	1	0	.02	-	< 0.01	1.00E00	1.00E00
6-phosphofructo-2-kinase activity (GO:0003873)	4	0	.06	-	< 0.01	1.00E00	1.00E00
5-aminolevulinate synthase activity (GO:0003870)	2	0	.03	-	< 0.01	1.00E00	1.00E00
NAD-dependent histone deacetylase activity (H3-K9 specific) (GO:0046969)	2	0	.03	-	< 0.01	1.00E00	1.00E00
thyroid hormone receptor binding (GO:0046966)	31	0	.49	-	< 0.01	1.00E00	1.00E00
retinoid X receptor binding (GO:0046965)	17	0	.27	-	< 0.01	1.00E00	1.00E00
3'-phosphoadenosine 5'-phosphosulfate transmembrane transporter activity (GO:0046964)	2	0	.03	-	< 0.01	1.00E00	1.00E00
3',5'-nucleotide bisphosphate phosphatase activity (GO:0097657)	1	0	.02	-	< 0.01	1.00E00	1.00E00
pseudophosphatase activity (GO:0001691)	2	0	.03	-	< 0.01	1.00E00	1.00E00
serpin family protein binding (GO:0097655)	1	0	.02	-	< 0.01	1.00E00	1.00E00
tRNA dimethylallyltransferase activity (GO:0052381)	1	0	.02	-	< 0.01	1.00E00	1.00E00
4-hydroxyphenylpyruvate dioxygenase activity (GO:0003868)	2	0	.03	-	< 0.01	1.00E00	1.00E00
mitochondrial ATP-gated potassium channel activity (GO:0062156)	1	0	.02	-	< 0.01	1.00E00	1.00E00
4-aminobutyrate transaminase activity (GO:0003867)	1	0	.02	-	< 0.01	1.00E00	1.00E00
N6-mAMP deaminase activity (GO:0062154)	1	0	.02	-	< 0.01	1.00E00	1.00E00
3-oxo-5-alpha-steroid 4-dehydrogenase activity (GO:0003865)	3	0	.05	-	< 0.01	1.00E00	1.00E00
C5-methylcytidine-containing RNA binding (GO:0062153)	3	0	.05	-	< 0.01	1.00E00	1.00E00
mRNA (cytidine-5-)-methyltransferase activity (GO:0062152)	1	0	.02	-	< 0.01	1.00E00	1.00E00
3-methyl-2-oxobutanoate dehydrogenase (2-methylpropanoyl-transferring) activity (GO:0003863)	2	0	.03	-	< 0.01	1.00E00	1.00E00
troponin T binding (GO:0031014)	4	0	.06	-	< 0.01	1.00E00	1.00E00
troponin I binding (GO:0031013)	5	0	.08	-	< 0.01	1.00E00	1.00E00
3-hydroxyisobutyryl-CoA hydrolase activity (GO:0003860)	1	0	.02	-	< 0.01	1.00E00	1.00E00
sialate O-acetylesterase activity (GO:0001681)	1	0	.02	-	< 0.01	1.00E00	1.00E00
amylin binding (GO:0097645)	1	0	.02	-	< 0.01	1.00E00	1.00E00
calcitonin family binding (GO:0097644)	5	0	.08	-	< 0.01	1.00E00	1.00E00
amylin receptor activity (GO:0097643)	4	0	.06	-	< 0.01	1.00E00	1.00E00
calcitonin family receptor activity (GO:0097642)	6	0	.10	-	< 0.01	1.00E00	1.00E00
[phosphorylase] phosphatase activity (GO:0050196)	2	0	.03	-	< 0.01	1.00E00	1.00E00
3-hydroxybutyrate dehydrogenase activity (GO:0003858)	2	0	.03	-	< 0.01	1.00E00	1.00E00
3-hydroxyacyl-CoA dehydrogenase activity (GO:0003857)	8	0	.13	-	< 0.01	1.00E00	1.00E00
3-beta-hydroxy-delta5-steroid dehydrogenase activity (GO:0003854)	6	0	.10	-	< 0.01	1.00E00	1.00E00
2-methylacyl-CoA dehydrogenase activity (GO:0003853)	1	0	.02	-	< 0.01	1.00E00	1.00E00
filamin binding (GO:0031005)	13	1	.21	+	4.84	1.98E-01	1.00E00
2-hydroxyacylsphingosine 1-beta-galactosyltransferase activity (GO:0003851)	1	0	.02	-	< 0.01	1.00E00	1.00E00
ATPase activator activity (GO:0001671)	27	0	.43	-	< 0.01	1.00E00	1.00E00
carboxylic acid transmembrane transporter activity (GO:0046943)	163	3	2.59	+	1.16	7.47E-01	1.00E00
phosphatidylinositol deacylase activity (GO:0050185)	1	0	.02	-	< 0.01	1.00E00	1.00E00
peptide deformylase activity (GO:0042586)	1	0	.02	-	< 0.01	1.00E00	1.00E00
Fc-gamma receptor I complex binding (GO:0034988)	2	0	.03	-	< 0.01	1.00E00	1.00E00
immunoglobulin receptor binding (GO:0034987)	97	0	1.54	-	< 0.01	4.10E-01	1.00E00
iron chaperone activity (GO:0034986)	2	0	.03	-	< 0.01	1.00E00	1.00E00
1-alkyl-2-acetylglycerophosphocholine esterase activity (GO:0003847)	8	1	.13	+	7.87	1.32E-01	1.00E00
2-acylglycerol O-acyltransferase activity (GO:0003846)	7	0	.11	-	< 0.01	1.00E00	1.00E00
11-beta-hydroxysteroid dehydrogenase [NAD(P)] activity (GO:0003845)	2	0	.03	-	< 0.01	1.00E00	1.00E00
1,4-alpha-glucan branching enzyme activity (GO:0003844)	1	0	.02	-	< 0.01	1.00E00	1.00E00
1-pyrroline-5-carboxylate dehydrogenase activity (GO:0003842)	1	0	.02	-	< 0.01	1.00E00	1.00E00
1-acylglycerol-3-phosphate O-acyltransferase activity (GO:0003841)	21	0	.33	-	< 0.01	1.00E00	1.00E00
alpha-N-acetylgalactosaminide alpha-2,6-sialyltransferase activity (GO:0001665)	6	0	.10	-	< 0.01	1.00E00	1.00E00
G protein-coupled receptor binding (GO:0001664)	299	4	4.75	-	.84	1.00E00	1.00E00
2'-deoxyadenosine deaminase activity (GO:0046936)	1	0	.02	-	< 0.01	1.00E00	1.00E00
1-phosphatidylinositol-3-kinase regulator activity (GO:0046935)	16	0	.25	-	< 0.01	1.00E00	1.00E00
phosphatidylinositol-4,5-bisphosphate 3-kinase activity (GO:0046934)	7	0	.11	-	< 0.01	1.00E00	1.00E00
phenylpyruvate tautomerase activity (GO:0050178)	2	0	.03	-	< 0.01	1.00E00	1.00E00
monoamine oxidase activity (GO:0097621)	3	0	.05	-	< 0.01	1.00E00	1.00E00
phosphoric ester hydrolase activity (GO:0042578)	374	9	5.94	+	1.52	2.07E-01	1.00E00
lipid phosphatase activity (GO:0042577)	16	0	.25	-	< 0.01	1.00E00	1.00E00
NAD-dependent protein deacetylase activity (GO:0034979)	16	0	.25	-	< 0.01	1.00E00	1.00E00
5-diphosphoinositol pentakisphosphate 3-kinase activity (GO:0102092)	2	0	.03	-	< 0.01	1.00E00	1.00E00
gamma-glutamylcyclotransferase activity (GO:0003839)	3	0	.05	-	< 0.01	1.00E00	1.00E00
beta-galactoside (CMP) alpha-2,3-sialyltransferase activity (GO:0003836)	7	0	.11	-	< 0.01	1.00E00	1.00E00
beta-galactoside alpha-2,6-sialyltransferase activity (GO:0003835)	2	0	.03	-	< 0.01	1.00E00	1.00E00
4-hydroxybutyrate receptor activity (GO:0062124)	1	0	.02	-	< 0.01	1.00E00	1.00E00
beta-carotene 15,15'-monooxygenase activity (GO:0003834)	2	0	.03	-	< 0.01	1.00E00	1.00E00
beta-N-acetylglucosaminylglycopeptide beta-1,4-galactosyltransferase activity (GO:0003831)	4	0	.06	-	< 0.01	1.00E00	1.00E00
heterotrimeric G-protein binding (GO:0032795)	3	0	.05	-	< 0.01	1.00E00	1.00E00
beta-1,4-mannosylglycoprotein 4-beta-N-acetylglucosaminyltransferase activity (GO:0003830)	1	0	.02	-	< 0.01	1.00E00	1.00E00
peptide receptor activity (GO:0001653)	152	0	2.41	-	< 0.01	1.81E-01	1.00E00
annealing activity (GO:0097617)	13	0	.21	-	< 0.01	1.00E00	1.00E00
ER retention sequence binding (GO:0046923)	5	0	.08	-	< 0.01	1.00E00	1.00E00
peptide-O-fucosyltransferase activity (GO:0046922)	2	0	.03	-	< 0.01	1.00E00	1.00E00
alpha-(1->6)-fucosyltransferase activity (GO:0046921)	1	0	.02	-	< 0.01	1.00E00	1.00E00
alpha-(1->3)-fucosyltransferase activity (GO:0046920)	8	0	.13	-	< 0.01	1.00E00	1.00E00
cuprous ion binding (GO:1903136)	8	0	.13	-	< 0.01	1.00E00	1.00E00
L-dopa O-methyltransferase activity (GO:0102084)	3	0	.05	-	< 0.01	1.00E00	1.00E00
cupric ion binding (GO:1903135)	4	0	.06	-	< 0.01	1.00E00	1.00E00
hormone binding (GO:0042562)	86	0	1.37	-	< 0.01	6.47E-01	1.00E00
beta-1,3-galactosyl-O-glycosyl-glycoprotein beta-1,6-N-acetylglucosaminyltransferase activity (GO:0003829)	3	0	.05	-	< 0.01	1.00E00	1.00E00
alpha-N-acetylneuraminate alpha-2,8-sialyltransferase activity (GO:0003828)	6	0	.10	-	< 0.01	1.00E00	1.00E00
alpha-1,3-mannosylglycoprotein 2-beta-N-acetylglucosaminyltransferase activity (GO:0003827)	1	0	.02	-	< 0.01	1.00E00	1.00E00
antigen binding (GO:0003823)	187	2	2.97	-	.67	1.00E00	1.00E00
vascular endothelial growth factor binding (GO:0038085)	5	0	.08	-	< 0.01	1.00E00	1.00E00
transition metal ion transmembrane transporter activity (GO:0046915)	37	0	.59	-	< 0.01	1.00E00	1.00E00
group III metabotropic glutamate receptor activity (GO:0001642)	2	0	.03	-	< 0.01	1.00E00	1.00E00
group II metabotropic glutamate receptor activity (GO:0001641)	2	0	.03	-	< 0.01	1.00E00	1.00E00
adenylate cyclase inhibiting G protein-coupled glutamate receptor activity (GO:0001640)	9	0	.14	-	< 0.01	1.00E00	1.00E00
temperature-gated cation channel activity (GO:0097604)	2	0	.03	-	< 0.01	1.00E00	1.00E00
temperature-gated ion channel activity (GO:0097603)	3	0	.05	-	< 0.01	1.00E00	1.00E00
acid-sensing ion channel activity (GO:0044736)	2	0	.03	-	< 0.01	1.00E00	1.00E00
cullin family protein binding (GO:0097602)	25	0	.40	-	< 0.01	1.00E00	1.00E00
ornithine(lysine) transaminase activity (GO:0050155)	1	0	.02	-	< 0.01	1.00E00	1.00E00
oleamide hydrolase activity (GO:0102077)	2	0	.03	-	< 0.01	1.00E00	1.00E00
omega-hydroxydecanoate dehydrogenase activity (GO:0050153)	1	0	.02	-	< 0.01	1.00E00	1.00E00
beta,beta-carotene-9',10'-cleaving oxygenase activity (GO:0102076)	1	0	.02	-	< 0.01	1.00E00	1.00E00
bone sialoprotein binding (GO:0044730)	1	0	.02	-	< 0.01	1.00E00	1.00E00
omega-amidase activity (GO:0050152)	1	0	.02	-	< 0.01	1.00E00	1.00E00
RNA 2'-O-methyltransferase activity (GO:0062105)	8	0	.13	-	< 0.01	1.00E00	1.00E00
peptidyl-aspartic acid 3-dioxygenase activity (GO:0062101)	1	0	.02	-	< 0.01	1.00E00	1.00E00
G protein-coupled chemoattractant receptor activity (GO:0001637)	26	0	.41	-	< 0.01	1.00E00	1.00E00
protein-glutamine gamma-glutamyltransferase activity (GO:0003810)	9	0	.14	-	< 0.01	1.00E00	1.00E00
calcitonin gene-related peptide receptor activity (GO:0001635)	4	0	.06	-	< 0.01	1.00E00	1.00E00
tetrapyrrole binding (GO:0046906)	153	1	2.43	-	.41	7.37E-01	1.00E00
leukotriene B4 receptor activity (GO:0001632)	2	0	.03	-	< 0.01	1.00E00	1.00E00
calcium oxalate binding (GO:0046904)	1	0	.02	-	< 0.01	1.00E00	1.00E00
cysteinyl leukotriene receptor activity (GO:0001631)	2	0	.03	-	< 0.01	1.00E00	1.00E00
neurotransmitter receptor activity (GO:0030594)	114	0	1.81	-	< 0.01	4.29E-01	1.00E00
hemi-methylated DNA-binding (GO:0044729)	3	0	.05	-	< 0.01	1.00E00	1.00E00
nucleoside monophosphate kinase activity (GO:0050145)	21	0	.33	-	< 0.01	1.00E00	1.00E00
copper-dependent protein binding (GO:0032767)	3	0	.05	-	< 0.01	1.00E00	1.00E00
nociceptin receptor activity (GO:0001626)	1	0	.02	-	< 0.01	1.00E00	1.00E00
[methionine synthase] reductase activity (GO:0030586)	1	0	.02	-	< 0.01	1.00E00	1.00E00
G protein-coupled ADP receptor activity (GO:0001621)	3	0	.05	-	< 0.01	1.00E00	1.00E00
8-hydroxy-dADP phosphatase activity (GO:0044717)	1	0	.02	-	< 0.01	1.00E00	1.00E00
8-oxo-GDP phosphatase activity (GO:0044716)	2	0	.03	-	< 0.01	1.00E00	1.00E00
quinone cofactor methyltransferase activity (GO:0030580)	2	0	.03	-	< 0.01	1.00E00	1.00E00
8-oxo-dGDP phosphatase activity (GO:0044715)	2	0	.03	-	< 0.01	1.00E00	1.00E00
NADH dehydrogenase (quinone) activity (GO:0050136)	43	1	.68	+	1.46	5.00E-01	1.00E00
NAD(P)+ nucleosidase activity (GO:0050135)	16	0	.25	-	< 0.01	1.00E00	1.00E00
growth hormone secretagogue receptor activity (GO:0001616)	1	0	.02	-	< 0.01	1.00E00	1.00E00
purinergic nucleotide receptor activity (GO:0001614)	21	0	.33	-	< 0.01	1.00E00	1.00E00
phosphatidyltransferase activity (GO:0030572)	1	0	.02	-	< 0.01	1.00E00	1.00E00
N-acylneuraminate-9-phosphatase activity (GO:0050124)	1	0	.02	-	< 0.01	1.00E00	1.00E00
N-acylglucosamine 2-epimerase activity (GO:0050121)	1	0	.02	-	< 0.01	1.00E00	1.00E00
dynorphin receptor activity (GO:0038048)	1	0	.02	-	< 0.01	1.00E00	1.00E00
morphine receptor activity (GO:0038047)	1	0	.02	-	< 0.01	1.00E00	1.00E00
G protein-coupled enkephalin receptor activity (GO:0038046)	1	0	.02	-	< 0.01	1.00E00	1.00E00
G protein-coupled adenosine receptor activity (GO:0001609)	5	0	.08	-	< 0.01	1.00E00	1.00E00
neuromedin U receptor activity (GO:0001607)	2	0	.03	-	< 0.01	1.00E00	1.00E00
adrenomedullin receptor activity (GO:0001605)	3	0	.05	-	< 0.01	1.00E00	1.00E00
urotensin II receptor activity (GO:0001604)	2	0	.03	-	< 0.01	1.00E00	1.00E00
pancreatic polypeptide receptor activity (GO:0001602)	5	0	.08	-	< 0.01	1.00E00	1.00E00
peptide YY receptor activity (GO:0001601)	2	0	.03	-	< 0.01	1.00E00	1.00E00
N-acetylglucosamine deacetylase activity (GO:0050119)	2	0	.03	-	< 0.01	1.00E00	1.00E00
myosin-light-chain-phosphatase activity (GO:0050115)	1	0	.02	-	< 0.01	1.00E00	1.00E00
inositol oxygenase activity (GO:0050113)	1	0	.02	-	< 0.01	1.00E00	1.00E00
isobutyryl-CoA:FAD oxidoreductase activity (GO:0102035)	1	0	.02	-	< 0.01	1.00E00	1.00E00
long-chain fatty acid omega-hydroxylase activity (GO:0102033)	5	0	.08	-	< 0.01	1.00E00	1.00E00
sphingosine-1-phosphate receptor activity (GO:0038036)	8	0	.13	-	< 0.01	1.00E00	1.00E00
protein-glutaryllysine deglutarylase activity (GO:0061697)	2	0	.03	-	< 0.01	1.00E00	1.00E00
cGMP binding (GO:0030553)	15	0	.24	-	< 0.01	1.00E00	1.00E00
lipoamidase activity (GO:0061690)	1	0	.02	-	< 0.01	1.00E00	1.00E00
cAMP binding (GO:0030552)	23	0	.37	-	< 0.01	1.00E00	1.00E00
cyclic nucleotide binding (GO:0030551)	37	0	.59	-	< 0.01	1.00E00	1.00E00
acetylcholine receptor inhibitor activity (GO:0030550)	7	0	.11	-	< 0.01	1.00E00	1.00E00
L-gulonate 3-dehydrogenase activity (GO:0050104)	1	0	.02	-	< 0.01	1.00E00	1.00E00
benzaldehyde dehydrogenase (NAD+) activity (GO:0018479)	3	0	.05	-	< 0.01	1.00E00	1.00E00
malonate-semialdehyde dehydrogenase (acetylating) activity (GO:0018478)	1	0	.02	-	< 0.01	1.00E00	1.00E00
benzaldehyde dehydrogenase (NADP+) activity (GO:0018477)	1	0	.02	-	< 0.01	1.00E00	1.00E00
aspartic endopeptidase activity, intramembrane cleaving (GO:0042500)	8	0	.13	-	< 0.01	1.00E00	1.00E00
lipase activity (GO:0016298)	131	2	2.08	-	.96	1.00E00	1.00E00
anaphase-promoting complex binding (GO:0010997)	8	1	.13	+	7.87	1.32E-01	1.00E00
reelin receptor activity (GO:0038025)	2	0	.03	-	< 0.01	1.00E00	1.00E00
cargo receptor activity (GO:0038024)	78	3	1.24	+	2.42	1.33E-01	1.00E00
acetylcholine receptor activator activity (GO:0030549)	4	0	.06	-	< 0.01	1.00E00	1.00E00
[truncated: 2,863 more rows]

## Sheet: Reactome pathways
Reactome pathways	Homo sapiens - REFLIST (20595)	upload_1 (327)	upload_1 (expected)	upload_1 (over/under)	upload_1 (fold Enrichment)	upload_1 (raw P-value)	upload_1 (FDR)
Unclassified (UNCLASSIFIED)	9941	66	157.84	-	.42	1.69E-25	3.85E-22	FDR < 0.05
Neutrophil degranulation (R-HSA-6798695)	478	48	7.59	+	6.32	3.51E-23	4.01E-20
Metabolism (R-HSA-1430728)	2079	96	33.01	+	2.91	9.12E-22	6.94E-19
Innate Immune System (R-HSA-168249)	1105	58	17.54	+	3.31	3.02E-15	1.73E-12
Immune System (R-HSA-168256)	2158	84	34.26	+	2.45	1.49E-14	6.79E-12
Metabolism of amino acids and derivatives (R-HSA-71291)	367	27	5.83	+	4.63	1.50E-10	5.73E-08
Disease (R-HSA-1643685)	1126	46	17.88	+	2.57	8.11E-09	2.65E-06
Developmental Biology (R-HSA-1266738)	1055	42	16.75	+	2.51	9.72E-08	2.47E-05
Selenocysteine synthesis (R-HSA-2408557)	93	12	1.48	+	8.13	9.25E-08	2.64E-05
Selenoamino acid metabolism (R-HSA-2408522)	116	13	1.84	+	7.06	1.21E-07	2.77E-05
Gluconeogenesis (R-HSA-70263)	33	8	.52	+	15.27	1.99E-07	4.14E-05
Formation of the cornified envelope (R-HSA-6809371)	129	13	2.05	+	6.35	3.74E-07	7.11E-05
Peptide chain elongation (R-HSA-156902)	89	11	1.41	+	7.78	4.72E-07	7.70E-05
L13a-mediated translational silencing of Ceruloplasmin expression (R-HSA-156827)	111	12	1.76	+	6.81	5.30E-07	8.07E-05
GTP hydrolysis and joining of the 60S ribosomal subunit (R-HSA-72706)	112	12	1.78	+	6.75	5.79E-07	8.27E-05
Viral mRNA Translation (R-HSA-192823)	89	11	1.41	+	7.78	4.72E-07	8.30E-05
Eukaryotic Translation Elongation (R-HSA-156842)	94	11	1.49	+	7.37	7.75E-07	8.85E-05
Nonsense Mediated Decay (NMD) independent of the Exon Junction Complex (EJC) (R-HSA-975956)	95	11	1.51	+	7.29	8.53E-07	8.85E-05
Nonsense Mediated Decay (NMD) enhanced by the Exon Junction Complex (EJC) (R-HSA-975957)	115	12	1.83	+	6.57	7.50E-07	9.01E-05
Infectious disease (R-HSA-5663205)	464	24	7.37	+	3.26	8.46E-07	9.21E-05
Influenza Life Cycle (R-HSA-168255)	141	13	2.24	+	5.81	9.49E-07	9.43E-05
Eukaryotic Translation Termination (R-HSA-72764)	93	11	1.48	+	7.45	7.03E-07	9.45E-05
Nonsense-Mediated Decay (NMD) (R-HSA-927802)	115	12	1.83	+	6.57	7.50E-07	9.51E-05
Cap-dependent Translation Initiation (R-HSA-72737)	119	12	1.89	+	6.35	1.05E-06	9.56E-05
Eukaryotic Translation Initiation (R-HSA-72613)	119	12	1.89	+	6.35	1.05E-06	9.96E-05
Axon guidance (R-HSA-422475)	547	26	8.69	+	2.99	1.33E-06	1.17E-04
Membrane Trafficking (R-HSA-199991)	624	28	9.91	+	2.83	1.51E-06	1.19E-04
Metabolism of carbohydrates (R-HSA-71387)	286	18	4.54	+	3.96	1.58E-06	1.20E-04
Response of EIF2AK4 (GCN2) to amino acid deficiency (R-HSA-9633012)	101	11	1.60	+	6.86	1.48E-06	1.21E-04
Formation of a pool of free 40S subunits (R-HSA-72689)	101	11	1.60	+	6.86	1.48E-06	1.25E-04
Influenza Infection (R-HSA-168254)	152	13	2.41	+	5.39	2.07E-06	1.52E-04
Extracellular matrix organization (R-HSA-1474244)	299	18	4.75	+	3.79	2.85E-06	2.04E-04
Vesicle-mediated transport (R-HSA-5653656)	725	30	11.51	+	2.61	3.07E-06	2.12E-04
COPI-independent Golgi-to-ER retrograde traffic (R-HSA-6811436)	51	8	.81	+	9.88	3.62E-06	2.43E-04
SRP-dependent cotranslational protein targeting to membrane (R-HSA-1799339)	112	11	1.78	+	6.19	3.74E-06	2.44E-04
Regulation of expression of SLITs and ROBOs (R-HSA-9010553)	169	13	2.68	+	4.84	6.12E-06	3.88E-04
Hemostasis (R-HSA-109582)	669	27	10.62	+	2.54	1.49E-05	9.22E-04
Signaling by ROBO receptors (R-HSA-376176)	215	14	3.41	+	4.10	1.61E-05	9.41E-04
Influenza Viral RNA Transcription and Replication (R-HSA-168273)	132	11	2.10	+	5.25	1.59E-05	9.54E-04
Glucose metabolism (R-HSA-70326)	86	9	1.37	+	6.59	1.80E-05	1.03E-03
Metabolism of proteins (R-HSA-392499)	1977	56	31.39	+	1.78	2.81E-05	1.57E-03
Platelet activation, signaling and aggregation (R-HSA-76002)	259	15	4.11	+	3.65	2.95E-05	1.60E-03
Cellular responses to stress (R-HSA-2262752)	547	23	8.69	+	2.65	3.56E-05	1.89E-03
MHC class II antigen presentation (R-HSA-2132295)	124	10	1.97	+	5.08	4.99E-05	2.59E-03
Cellular responses to external stimuli (R-HSA-8953897)	561	23	8.91	+	2.58	5.15E-05	2.62E-03
Major pathway of rRNA processing in the nucleolus and cytosol (R-HSA-6791226)	182	12	2.89	+	4.15	5.76E-05	2.86E-03
Translation initiation complex formation (R-HSA-72649)	58	7	.92	+	7.60	6.84E-05	3.25E-03
Ribosomal scanning and start codon recognition (R-HSA-72702)	58	7	.92	+	7.60	6.84E-05	3.32E-03
Keratinization (R-HSA-6805567)	217	13	3.45	+	3.77	7.22E-05	3.36E-03
Activation of the mRNA upon binding of the cap-binding complex and eIFs, and subsequent binding to 43S (R-HSA-72662)	59	7	.94	+	7.47	7.55E-05	3.45E-03
rRNA processing in the nucleus and cytosol (R-HSA-8868773)	192	12	3.05	+	3.94	9.33E-05	4.18E-03
Transport of small molecules (R-HSA-382551)	719	26	11.42	+	2.28	1.30E-04	5.70E-03
rRNA processing (R-HSA-72312)	202	12	3.21	+	3.74	1.47E-04	6.32E-03
Asparagine N-linked glycosylation (R-HSA-446203)	303	15	4.81	+	3.12	1.57E-04	6.64E-03
Fatty acid metabolism (R-HSA-8978868)	174	11	2.76	+	3.98	1.66E-04	6.87E-03
Translocation of SLC2A4 (GLUT4) to the plasma membrane (R-HSA-1445148)	70	7	1.11	+	6.30	2.01E-04	8.07E-03
Formation of xylulose-5-phosphate (R-HSA-5661270)	5	3	.08	+	37.79	2.00E-04	8.15E-03
Transport to the Golgi and subsequent modification (R-HSA-948021)	184	11	2.92	+	3.77	2.61E-04	9.95E-03
Formation of the ternary complex, and subsequently, the 43S complex (R-HSA-72695)	51	6	.81	+	7.41	2.58E-04	1.00E-02
Selective autophagy (R-HSA-9663891)	73	7	1.16	+	6.04	2.56E-04	1.01E-02
Fibronectin matrix formation (R-HSA-1566977)	6	3	.10	+	31.49	2.96E-04	1.09E-02
Platelet degranulation (R-HSA-114608)	127	9	2.02	+	4.46	2.94E-04	1.10E-02
Translation (R-HSA-72766)	293	14	4.65	+	3.01	3.64E-04	1.32E-02
HSP90 chaperone cycle for steroid hormone receptors (SHR) (R-HSA-3371497)	55	6	.87	+	6.87	3.75E-04	1.34E-02
Response to elevated platelet cytosolic Ca2+ (R-HSA-76005)	132	9	2.10	+	4.29	3.84E-04	1.35E-02
Intra-Golgi and retrograde Golgi-to-ER traffic (R-HSA-6811442)	201	11	3.19	+	3.45	5.31E-04	1.81E-02
Non-integrin membrane-ECM interactions (R-HSA-3000171)	59	6	.94	+	6.40	5.30E-04	1.83E-02
Autophagy (R-HSA-9612973)	143	9	2.27	+	3.96	6.62E-04	2.19E-02
MET promotes cell motility (R-HSA-8875878)	40	5	.64	+	7.87	6.62E-04	2.22E-02
Synthesis of 5-eicosatetraenoic acids (R-HSA-2142688)	9	3	.14	+	20.99	7.50E-04	2.45E-02
Cholesterol biosynthesis (R-HSA-191273)	24	4	.38	+	10.50	8.92E-04	2.87E-02
Chylomicron remodeling (R-HSA-8963901)	10	3	.16	+	18.89	9.63E-04	3.06E-02
Retinoid metabolism and transport (R-HSA-975634)	44	5	.70	+	7.16	9.82E-04	3.07E-02
Signaling downstream of RAS mutants (R-HSA-9649948)	45	5	.71	+	7.00	1.08E-03	3.15E-02
Signaling by moderate kinase activity BRAF mutants (R-HSA-6802946)	45	5	.71	+	7.00	1.08E-03	3.20E-02
Signaling by RAS mutants (R-HSA-6802949)	45	5	.71	+	7.00	1.08E-03	3.24E-02
Paradoxical activation of RAF signaling by kinase inactive BRAF (R-HSA-6802955)	45	5	.71	+	7.00	1.08E-03	3.28E-02
Metabolism of vitamins and cofactors (R-HSA-196854)	186	10	2.95	+	3.39	1.07E-03	3.31E-02
Macroautophagy (R-HSA-1632852)	128	8	2.03	+	3.94	1.36E-03	3.89E-02
Metabolism of lipids (R-HSA-556833)	733	24	11.64	+	2.06	1.36E-03	3.94E-02
Metabolism of fat-soluble vitamins (R-HSA-6806667)	48	5	.76	+	6.56	1.40E-03	3.96E-02
COPI-mediated anterograde transport (R-HSA-6807878)	100	7	1.59	+	4.41	1.47E-03	4.09E-02
Phosphorylation of CD3 and TCR zeta chains (R-HSA-202427)	28	4	.44	+	9.00	1.49E-03	4.10E-02
Golgi-to-ER retrograde transport (R-HSA-8856688)	133	8	2.11	+	3.79	1.72E-03	4.66E-02
MET activates PTK2 signaling (R-HSA-8874081)	30	4	.48	+	8.40	1.88E-03	4.76E-02
RHO GTPases activate IQGAPs (R-HSA-5626467)	30	4	.48	+	8.40	1.88E-03	4.82E-02
Signaling by MET (R-HSA-6806834)	76	6	1.21	+	4.97	1.80E-03	4.84E-02
Plasma lipoprotein remodeling (R-HSA-8963899)	30	4	.48	+	8.40	1.88E-03	4.87E-02
G alpha (s) signalling events (R-HSA-418555)	575	1	9.13	-	.11	1.84E-03	4.89E-02
Laminin interactions (R-HSA-3000157)	30	4	.48	+	8.40	1.88E-03	4.93E-02
Integration of energy metabolism (R-HSA-163685)	107	7	1.70	+	4.12	2.11E-03	5.18E-02
Post-translational protein phosphorylation (R-HSA-8957275)	107	7	1.70	+	4.12	2.11E-03	5.24E-02
Amyloid fiber formation (R-HSA-977225)	79	6	1.25	+	4.78	2.16E-03	5.26E-02
Regulation of cholesterol biosynthesis by SREBP (SREBF) (R-HSA-1655829)	53	5	.84	+	5.94	2.10E-03	5.28E-02
Olfactory Signaling Pathway (R-HSA-381753)	432	0	6.86	-	< 0.01	2.38E-03	5.73E-02
Pentose phosphate pathway (R-HSA-71336)	15	3	.24	+	12.60	2.59E-03	6.17E-02
Iron uptake and transport (R-HSA-917937)	57	5	.91	+	5.52	2.83E-03	6.65E-02
Integrin cell surface interactions (R-HSA-216083)	84	6	1.33	+	4.50	2.89E-03	6.73E-02
Glycine degradation (R-HSA-6783984)	4	2	.06	+	31.49	3.50E-03	8.09E-02
Apoptotic cleavage of cellular proteins (R-HSA-111465)	37	4	.59	+	6.81	3.76E-03	8.42E-02
Fatty acyl-CoA biosynthesis (R-HSA-75105)	37	4	.59	+	6.81	3.76E-03	8.51E-02
Glutathione conjugation (R-HSA-156590)	37	4	.59	+	6.81	3.76E-03	8.59E-02
ER to Golgi Anterograde Transport (R-HSA-199977)	153	8	2.43	+	3.29	3.89E-03	8.64E-02
Microtubule-dependent trafficking of connexons from Golgi to the plasma membrane (R-HSA-190840)	18	3	.29	+	10.50	4.08E-03	8.97E-02
Cell junction organization (R-HSA-446728)	91	6	1.44	+	4.15	4.18E-03	9.10E-02
Recruitment of NuMA to mitotic centrosomes (R-HSA-380320)	92	6	1.46	+	4.11	4.40E-03	9.48E-02
Protein localization (R-HSA-9609507)	158	8	2.51	+	3.19	4.68E-03	9.72E-02
Regulation of Insulin-like Growth Factor (IGF) transport and uptake by Insulin-like Growth Factor Binding Proteins (IGFBPs) (R-HSA-381426)	124	7	1.97	+	3.56	4.58E-03	9.77E-02
Transport of connexons to the plasma membrane (R-HSA-190872)	19	3	.30	+	9.94	4.67E-03	9.79E-02
Activation of gene expression by SREBF (SREBP) (R-HSA-2426168)	40	4	.64	+	6.30	4.86E-03	9.83E-02
RAB geranylgeranylation (R-HSA-8873719)	65	5	1.03	+	4.84	4.78E-03	9.83E-02
Scavenging by Class A Receptors (R-HSA-3000480)	19	3	.30	+	9.94	4.67E-03	9.88E-02
Tyrosine catabolism (R-HSA-8963684)	5	2	.08	+	25.19	4.86E-03	9.90E-02
Carboxyterminal post-translational modifications of tubulin (R-HSA-8955332)	41	4	.65	+	6.14	5.27E-03	1.06E-01
Plasma lipoprotein assembly, remodeling, and clearance (R-HSA-174824)	67	5	1.06	+	4.70	5.38E-03	1.07E-01
Loss of Nlp from mitotic centrosomes (R-HSA-380259)	68	5	1.08	+	4.63	5.71E-03	1.10E-01
Loss of proteins required for interphase microtubule organization from the centrosome (R-HSA-380284)	68	5	1.08	+	4.63	5.71E-03	1.11E-01
Aggrephagy (R-HSA-9646399)	42	4	.67	+	6.00	5.70E-03	1.12E-01
Post-chaperonin tubulin folding pathway (R-HSA-389977)	21	3	.33	+	9.00	6.00E-03	1.15E-01
GDP-fucose biosynthesis (R-HSA-6787639)	6	2	.10	+	20.99	6.41E-03	1.22E-01
AURKA Activation by TPX2 (R-HSA-8854518)	71	5	1.13	+	4.44	6.76E-03	1.28E-01
NR1H2 and NR1H3-mediated signaling (R-HSA-9024446)	45	4	.71	+	5.60	7.14E-03	1.33E-01
Oncogenic MAPK signaling (R-HSA-6802957)	72	5	1.14	+	4.37	7.14E-03	1.34E-01
RHO GTPase Effectors (R-HSA-195258)	286	11	4.54	+	2.42	7.33E-03	1.35E-01
Recycling pathway of L1 (R-HSA-437239)	46	4	.73	+	5.48	7.67E-03	1.40E-01
ChREBP activates metabolic gene expression (R-HSA-163765)	7	2	.11	+	17.99	8.15E-03	1.48E-01
Gap junction trafficking (R-HSA-190828)	47	4	.75	+	5.36	8.22E-03	1.48E-01
Formation of tubulin folding intermediates by CCT/TriC (R-HSA-389960)	24	3	.38	+	7.87	8.38E-03	1.50E-01
Gap junction trafficking and regulation (R-HSA-157858)	48	4	.76	+	5.25	8.80E-03	1.56E-01
Deadenylation of mRNA (R-HSA-429947)	25	3	.40	+	7.56	9.28E-03	1.59E-01
Phase II - Conjugation of compounds (R-HSA-156580)	108	6	1.71	+	3.50	9.07E-03	1.59E-01
Basigin interactions (R-HSA-210991)	25	3	.40	+	7.56	9.28E-03	1.61E-01
Translocation of ZAP-70 to Immunological synapse (R-HSA-202430)	25	3	.40	+	7.56	9.28E-03	1.62E-01
Adaptive Immune System (R-HSA-1280218)	819	23	13.00	+	1.77	9.78E-03	1.67E-01
Biological oxidations (R-HSA-211859)	219	9	3.48	+	2.59	9.94E-03	1.68E-01
Prefoldin mediated transfer of substrate to CCT/TriC (R-HSA-389957)	26	3	.41	+	7.27	1.02E-02	1.69E-01
Insulin receptor recycling (R-HSA-77387)	26	3	.41	+	7.27	1.02E-02	1.71E-01
Activation of AMPK downstream of NMDARs (R-HSA-9619483)	26	3	.41	+	7.27	1.02E-02	1.72E-01
Recruitment of mitotic centrosome proteins and complexes (R-HSA-380270)	80	5	1.27	+	3.94	1.07E-02	1.74E-01
Centrosome maturation (R-HSA-380287)	80	5	1.27	+	3.94	1.07E-02	1.75E-01
Apoptotic execution phase (R-HSA-75153)	51	4	.81	+	4.94	1.07E-02	1.76E-01
Metabolism of steroids (R-HSA-8957322)	148	7	2.35	+	2.98	1.11E-02	1.79E-01
Syndecan interactions (R-HSA-3000170)	27	3	.43	+	7.00	1.12E-02	1.80E-01
Serine biosynthesis (R-HSA-977347)	9	2	.14	+	14.00	1.22E-02	1.92E-01
TP53 Regulates Metabolic Genes (R-HSA-5628897)	83	5	1.32	+	3.79	1.23E-02	1.93E-01
HDL remodeling (R-HSA-8964058)	9	2	.14	+	14.00	1.22E-02	1.94E-01
L1CAM interactions (R-HSA-373760)	117	6	1.86	+	3.23	1.29E-02	1.99E-01
Pyruvate metabolism and Citric Acid (TCA) cycle (R-HSA-71406)	54	4	.86	+	4.67	1.28E-02	1.99E-01
Regulation of PLK1 Activity at G2/M Transition (R-HSA-2565942)	85	5	1.35	+	3.70	1.35E-02	2.05E-01
PD-1 signaling (R-HSA-389948)	29	3	.46	+	6.52	1.34E-02	2.06E-01
Chylomicron assembly (R-HSA-8963888)	10	2	.16	+	12.60	1.45E-02	2.19E-01
Pyruvate metabolism (R-HSA-70268)	30	3	.48	+	6.30	1.46E-02	2.19E-01
Rab regulation of trafficking (R-HSA-9007101)	121	6	1.92	+	3.12	1.49E-02	2.22E-01
Cooperation of Prefoldin and TriC/CCT in actin and tubulin folding (R-HSA-389958)	31	3	.49	+	6.09	1.58E-02	2.33E-01
Collagen formation (R-HSA-1474290)	89	5	1.41	+	3.54	1.60E-02	2.33E-01
HCMV Infection (R-HSA-9609646)	123	6	1.95	+	3.07	1.60E-02	2.34E-01
Transferrin endocytosis and recycling (R-HSA-917977)	31	3	.49	+	6.09	1.58E-02	2.35E-01
Cell surface interactions at the vascular wall (R-HSA-202733)	199	8	3.16	+	2.53	1.65E-02	2.38E-01
Phenylalanine and tyrosine metabolism (R-HSA-8963691)	11	2	.17	+	11.45	1.70E-02	2.41E-01
Plasma lipoprotein clearance (R-HSA-8964043)	32	3	.51	+	5.90	1.71E-02	2.41E-01
Apoptotic cleavage of cell adhesion proteins (R-HSA-351906)	11	2	.17	+	11.45	1.70E-02	2.42E-01
Free fatty acids regulate insulin secretion (R-HSA-400451)	11	2	.17	+	11.45	1.70E-02	2.44E-01
EPH-Ephrin signaling (R-HSA-2682334)	91	5	1.44	+	3.46	1.74E-02	2.44E-01
Peroxisomal protein import (R-HSA-9033241)	60	4	.95	+	4.20	1.79E-02	2.49E-01
Cell-Cell communication (R-HSA-1500931)	127	6	2.02	+	2.98	1.83E-02	2.53E-01
Metabolism of nucleotides (R-HSA-15869)	94	5	1.49	+	3.35	1.96E-02	2.62E-01
Aspartate and asparagine metabolism (R-HSA-8963693)	12	2	.19	+	10.50	1.96E-02	2.63E-01
Late endosomal microautophagy (R-HSA-9615710)	34	3	.54	+	5.56	1.99E-02	2.64E-01
Caspase-mediated cleavage of cytoskeletal proteins (R-HSA-264870)	12	2	.19	+	10.50	1.96E-02	2.65E-01
Erythrocytes take up carbon dioxide and release oxygen (R-HSA-1237044)	12	2	.19	+	10.50	1.96E-02	2.66E-01
Reversible hydration of carbon dioxide (R-HSA-1475029)	12	2	.19	+	10.50	1.96E-02	2.68E-01
O2/CO2 exchange in erythrocytes (R-HSA-1480926)	12	2	.19	+	10.50	1.96E-02	2.69E-01
Signaling by high-kinase activity BRAF mutants (R-HSA-6802948)	35	3	.56	+	5.40	2.13E-02	2.80E-01
Anchoring of the basal body to the plasma membrane (R-HSA-5620912)	96	5	1.52	+	3.28	2.12E-02	2.80E-01
Signaling by Receptor Tyrosine Kinases (R-HSA-9006934)	457	14	7.26	+	1.93	2.15E-02	2.81E-01
Semaphorin interactions (R-HSA-373755)	64	4	1.02	+	3.94	2.18E-02	2.83E-01
Visual phototransduction (R-HSA-2187338)	97	5	1.54	+	3.25	2.20E-02	2.84E-01
Apoptosis (R-HSA-109581)	171	7	2.72	+	2.58	2.22E-02	2.84E-01
Glutathione synthesis and recycling (R-HSA-174403)	13	2	.21	+	9.69	2.24E-02	2.85E-01
Mitochondrial protein import (R-HSA-1268020)	65	4	1.03	+	3.88	2.29E-02	2.87E-01
Gap junction assembly (R-HSA-190861)	36	3	.57	+	5.25	2.28E-02	2.88E-01
ROS and RNS production in phagocytes (R-HSA-1222556)	36	3	.57	+	5.25	2.28E-02	2.90E-01
Programmed Cell Death (R-HSA-5357801)	174	7	2.76	+	2.53	2.40E-02	3.00E-01
Gene and protein expression by JAK-STAT signaling after Interleukin-12 stimulation (R-HSA-8950505)	37	3	.59	+	5.11	2.44E-02	3.03E-01
Glycolysis (R-HSA-70171)	67	4	1.06	+	3.76	2.51E-02	3.10E-01
GRB2:SOS provides linkage to MAPK signaling for Integrins (R-HSA-354194)	14	2	.22	+	9.00	2.53E-02	3.11E-01
Post-translational protein modification (R-HSA-597592)	1388	33	22.04	+	1.50	2.58E-02	3.15E-01
GPCR downstream signalling (R-HSA-388396)	1143	9	18.15	-	.50	2.68E-02	3.24E-01
Metabolism of RNA (R-HSA-8953854)	661	18	10.50	+	1.72	2.68E-02	3.25E-01
MAP2K and MAPK activation (R-HSA-5674135)	39	3	.62	+	4.84	2.77E-02	3.33E-01
p130Cas linkage to MAPK signaling for integrins (R-HSA-372708)	15	2	.24	+	8.40	2.84E-02	3.39E-01
Metabolism of folate and pterines (R-HSA-196757)	16	2	.25	+	7.87	3.16E-02	3.47E-01
Signaling by GPCR (R-HSA-372790)	1212	10	19.24	-	.52	3.13E-02	3.47E-01
EPHB-mediated forward signaling (R-HSA-3928662)	41	3	.65	+	4.61	3.13E-02	3.48E-01
Processing of SMDT1 (R-HSA-8949664)	16	2	.25	+	7.87	3.16E-02	3.49E-01
Abnormal conversion of 2-oxoglutarate to 2-hydroxyglutarate (R-HSA-2978092)	1	1	.02	+	62.98	3.10E-02	3.49E-01
Assembly and cell surface presentation of NMDA receptors (R-HSA-9609736)	41	3	.65	+	4.61	3.13E-02	3.50E-01
Generation of second messenger molecules (R-HSA-202433)	40	3	.64	+	4.72	2.95E-02	3.51E-01
Alanine metabolism (R-HSA-8964540)	1	1	.02	+	62.98	3.10E-02	3.51E-01
Retinoid metabolism disease events (R-HSA-6809583)	1	1	.02	+	62.98	3.10E-02	3.52E-01
Defective GSS causes Glutathione synthetase deficiency (GSS deficiency) (R-HSA-5579006)	1	1	.02	+	62.98	3.10E-02	3.54E-01
Signaling by Hedgehog (R-HSA-5358351)	146	6	2.32	+	2.59	3.25E-02	3.55E-01
Defective ACY1 causes encephalopathy (R-HSA-5579007)	1	1	.02	+	62.98	3.10E-02	3.56E-01
Mtb iron assimilation by chelation (R-HSA-1222449)	1	1	.02	+	62.98	3.10E-02	3.58E-01
Cytokine Signaling in Immune system (R-HSA-1280215)	823	21	13.07	+	1.61	3.30E-02	3.59E-01
Defective DPAGT1 causes DPAGT1-CDG (CDG-1j) and CMSTA2 (R-HSA-4549356)	1	1	.02	+	62.98	3.10E-02	3.60E-01
Latent infection - Other responses of Mtb to phagocytosis (R-HSA-1222499)	1	1	.02	+	62.98	3.10E-02	3.61E-01
Defective SLC22A5 causes systemic primary carnitine deficiency (CDSP) (R-HSA-5619053)	1	1	.02	+	62.98	3.10E-02	3.63E-01
Essential pentosuria (R-HSA-5662853)	1	1	.02	+	62.98	3.10E-02	3.65E-01
NADPH regeneration (R-HSA-389542)	1	1	.02	+	62.98	3.10E-02	3.67E-01
Hedgehog 'off' state (R-HSA-5610787)	110	5	1.75	+	2.86	3.45E-02	3.74E-01
Transport of vitamins, nucleosides, and related molecules (R-HSA-425397)	43	3	.68	+	4.39	3.50E-02	3.77E-01
Interleukin-4 and Interleukin-13 signaling (R-HSA-6785807)	111	5	1.76	+	2.84	3.57E-02	3.82E-01
TBC/RABGAPs (R-HSA-8854214)	44	3	.70	+	4.29	3.70E-02	3.95E-01
Metabolism of Angiotensinogen to Angiotensins (R-HSA-2022377)	18	2	.29	+	7.00	3.84E-02	3.99E-01
TP53 Regulates Transcription of Genes Involved in G2 Cell Cycle Arrest (R-HSA-6804114)	18	2	.29	+	7.00	3.84E-02	4.01E-01
Assembly of active LPL and LIPC lipase complexes (R-HSA-8963889)	18	2	.29	+	7.00	3.84E-02	4.03E-01
Elastic fibre formation (R-HSA-1566948)	45	3	.71	+	4.20	3.90E-02	4.03E-01
Plasma lipoprotein assembly (R-HSA-8963898)	18	2	.29	+	7.00	3.84E-02	4.05E-01
G2/M Transition (R-HSA-69275)	193	7	3.06	+	2.28	3.82E-02	4.06E-01
Cell-extracellular matrix interactions (R-HSA-446353)	18	2	.29	+	7.00	3.84E-02	4.07E-01
Regulation of insulin secretion (R-HSA-422356)	78	4	1.24	+	3.23	3.96E-02	4.08E-01
Mitotic G2-G2/M phases (R-HSA-453274)	195	7	3.10	+	2.26	4.00E-02	4.09E-01
Signaling by Nuclear Receptors (R-HSA-9006931)	261	9	4.14	+	2.17	4.05E-02	4.13E-01
Interleukin-12 signaling (R-HSA-9020591)	46	3	.73	+	4.11	4.11E-02	4.17E-01
Mitotic Prometaphase (R-HSA-68877)	197	7	3.13	+	2.24	4.18E-02	4.22E-01
Other semaphorin interactions (R-HSA-416700)	19	2	.30	+	6.63	4.21E-02	4.23E-01
Cilium Assembly (R-HSA-5617833)	199	7	3.16	+	2.22	4.36E-02	4.37E-01
Insulin effects increased synthesis of Xylulose-5-Phosphate (R-HSA-163754)	2	1	.03	+	31.49	4.62E-02	4.49E-01
Signaling by Rho GTPases (R-HSA-194315)	416	12	6.61	+	1.82	4.64E-02	4.49E-01
Defective ABCA1 causes Tangier disease (R-HSA-5682113)	2	1	.03	+	31.49	4.62E-02	4.51E-01
Fructose biosynthesis (R-HSA-5652227)	2	1	.03	+	31.49	4.62E-02	4.53E-01
Activation, translocation and oligomerization of BAX (R-HSA-114294)	2	1	.03	+	31.49	4.62E-02	4.54E-01
Aflatoxin activation and detoxification (R-HSA-5423646)	20	2	.32	+	6.30	4.58E-02	4.55E-01
Defective SLC16A1 causes symptomatic deficiency in lactate transport (SDLT) (R-HSA-5619070)	2	1	.03	+	31.49	4.62E-02	4.56E-01
Nef-mediates down modulation of cell surface receptors by recruiting them to clathrin adapters (R-HSA-164938)	20	2	.32	+	6.30	4.58E-02	4.57E-01
TP53 Regulates Transcription of Cell Cycle Genes (R-HSA-6791312)	49	3	.78	+	3.86	4.77E-02	4.59E-01
Host Interactions of HIV factors (R-HSA-162909)	124	5	1.97	+	2.54	5.21E-02	5.00E-01
Citric acid cycle (TCA cycle) (R-HSA-71403)	22	2	.35	+	5.73	5.36E-02	5.08E-01
Pink/Parkin Mediated Mitophagy (R-HSA-5205685)	22	2	.35	+	5.73	5.36E-02	5.10E-01
GPCR ligand binding (R-HSA-500792)	462	2	7.34	-	.27	5.41E-02	5.11E-01
Chaperone Mediated Autophagy (R-HSA-9613829)	22	2	.35	+	5.73	5.36E-02	5.12E-01
Intraflagellar transport (R-HSA-5620924)	52	3	.83	+	3.63	5.47E-02	5.14E-01
Organelle biogenesis and maintenance (R-HSA-1852241)	291	9	4.62	+	1.95	5.56E-02	5.18E-01
Neddylation (R-HSA-8951664)	233	0	3.70	-	< 0.01	5.56E-02	5.20E-01
Mitochondrial calcium ion transport (R-HSA-8949215)	23	2	.37	+	5.48	5.77E-02	5.34E-01
RAB GEFs exchange GTP for GDP on RABs (R-HSA-8876198)	89	4	1.41	+	2.83	5.81E-02	5.35E-01
Cytosolic sulfonation of small molecules (R-HSA-156584)	23	2	.37	+	5.48	5.77E-02	5.36E-01
NTRK3 as a dependence receptor (R-HSA-9603505)	3	1	.05	+	20.99	6.11E-02	5.47E-01
RAS GTPase cycle mutants (R-HSA-9649913)	3	1	.05	+	20.99	6.11E-02	5.49E-01
Progressive trimming of alpha-1,2-linked mannose residues from Man9/8/7GlcNAc2 to produce Man5GlcNAc2 (R-HSA-964827)	3	1	.05	+	20.99	6.11E-02	5.51E-01
Cytosolic tRNA aminoacylation (R-HSA-379716)	24	2	.38	+	5.25	6.19E-02	5.52E-01
Intracellular metabolism of fatty acids regulates insulin secretion (R-HSA-434313)	3	1	.05	+	20.99	6.11E-02	5.54E-01
TRAF3 deficiency - HSE (R-HSA-5602571)	3	1	.05	+	20.99	6.11E-02	5.56E-01
The citric acid (TCA) cycle and respiratory electron transport (R-HSA-1428517)	173	6	2.75	+	2.18	6.26E-02	5.56E-01
Vpr-mediated induction of apoptosis by mitochondrial outer membrane permeabilization (R-HSA-180897)	3	1	.05	+	20.99	6.11E-02	5.58E-01
Vitamins B6 activation to pyridoxal phosphate (R-HSA-964975)	3	1	.05	+	20.99	6.11E-02	5.60E-01
Deadenylation-dependent mRNA decay (R-HSA-429914)	56	3	.89	+	3.37	6.48E-02	5.72E-01
Interleukin-12 family signaling (R-HSA-447115)	56	3	.89	+	3.37	6.48E-02	5.74E-01
Chaperonin-mediated protein folding (R-HSA-390466)	93	4	1.48	+	2.71	6.57E-02	5.77E-01
DAP12 signaling (R-HSA-2424491)	25	2	.40	+	5.04	6.62E-02	5.79E-01
RHO GTPases Activate Formins (R-HSA-5663220)	134	5	2.13	+	2.35	6.74E-02	5.87E-01
Class A/1 (Rhodopsin-like receptors) (R-HSA-373076)	330	1	5.24	-	.19	6.92E-02	6.01E-01
Integrin signaling (R-HSA-354192)	26	2	.41	+	4.84	7.05E-02	6.06E-01
The role of Nef in HIV-1 replication and disease pathogenesis (R-HSA-164952)	26	2	.41	+	4.84	7.05E-02	6.08E-01
N-glycan antennae elongation in the medial/trans-Golgi (R-HSA-975576)	26	2	.41	+	4.84	7.05E-02	6.10E-01
Kinesins (R-HSA-983189)	60	3	.95	+	3.15	7.58E-02	6.20E-01
Release of apoptotic factors from the mitochondria (R-HSA-111457)	4	1	.06	+	15.75	7.57E-02	6.22E-01
Arachidonic acid metabolism (R-HSA-2142753)	59	3	.94	+	3.20	7.30E-02	6.24E-01
Regulation of cortical dendrite branching (R-HSA-8985801)	4	1	.06	+	15.75	7.57E-02	6.25E-01
Cholesterol biosynthesis via desmosterol (R-HSA-6807047)	4	1	.06	+	15.75	7.57E-02	6.27E-01
Ion channel transport (R-HSA-983712)	183	6	2.91	+	2.06	7.69E-02	6.27E-01
Cholesterol biosynthesis via lathosterol (R-HSA-6807062)	4	1	.06	+	15.75	7.57E-02	6.29E-01
Degradation of the extracellular matrix (R-HSA-1474228)	140	5	2.22	+	2.25	7.76E-02	6.31E-01
Protein folding (R-HSA-391251)	99	4	1.57	+	2.54	7.82E-02	6.31E-01
Localization of the PINCH-ILK-PARVIN complex to focal adhesions (R-HSA-446343)	4	1	.06	+	15.75	7.57E-02	6.31E-01
HCMV Early Events (R-HSA-9609690)	99	4	1.57	+	2.54	7.82E-02	6.33E-01
Axonal growth stimulation (R-HSA-209563)	4	1	.06	+	15.75	7.57E-02	6.34E-01
HDL clearance (R-HSA-8964011)	4	1	.06	+	15.75	7.57E-02	6.36E-01
Mitophagy (R-HSA-5205647)	27	2	.43	+	4.67	7.50E-02	6.37E-01
Carnitine synthesis (R-HSA-71262)	4	1	.06	+	15.75	7.57E-02	6.38E-01
Infection with Mycobacterium tuberculosis (R-HSA-9635486)	27	2	.43	+	4.67	7.50E-02	6.39E-01
Interconversion of nucleotide di- and triphosphates (R-HSA-499943)	28	2	.44	+	4.50	7.96E-02	6.40E-01
Catecholamine biosynthesis (R-HSA-209905)	4	1	.06	+	15.75	7.57E-02	6.41E-01
Signaling by NOTCH (R-HSA-157118)	200	0	3.18	-	< 0.01	8.04E-02	6.44E-01
Transcriptional regulation by RUNX1 (R-HSA-8878171)	204	0	3.24	-	< 0.01	8.14E-02	6.50E-01
NEP/NS2 Interacts with the Cellular Export Machinery (R-HSA-168333)	29	2	.46	+	4.34	8.42E-02	6.70E-01
Clathrin-mediated endocytosis (R-HSA-8856828)	144	5	2.29	+	2.19	8.49E-02	6.73E-01
RNA Polymerase II Transcription (R-HSA-73857)	1318	13	20.93	-	.62	8.54E-02	6.75E-01
FOXO-mediated transcription (R-HSA-9614085)	65	3	1.03	+	2.91	9.05E-02	6.80E-01
N-glycan trimming and elongation in the cis-Golgi (R-HSA-964739)	5	1	.08	+	12.60	9.02E-02	6.80E-01
MET interacts with TNS proteins (R-HSA-8875513)	5	1	.08	+	12.60	9.02E-02	6.82E-01
Cell-cell junction organization (R-HSA-421270)	64	3	1.02	+	2.95	8.74E-02	6.84E-01
Melanin biosynthesis (R-HSA-5662702)	5	1	.08	+	12.60	9.02E-02	6.84E-01
Diseases of metabolism (R-HSA-5668914)	103	4	1.64	+	2.45	8.71E-02	6.86E-01
Signaling by BRAF and RAF fusions (R-HSA-6802952)	64	3	1.02	+	2.95	8.74E-02	6.86E-01
Scavenging by Class B Receptors (R-HSA-3000471)	5	1	.08	+	12.60	9.02E-02	6.87E-01
Abacavir metabolism (R-HSA-2161541)	5	1	.08	+	12.60	9.02E-02	6.89E-01
Export of Viral Ribonucleoproteins from Nucleus (R-HSA-168274)	30	2	.48	+	4.20	8.89E-02	6.91E-01
Diseases of glycosylation (R-HSA-3781865)	146	5	2.32	+	2.16	8.86E-02	6.91E-01
Chylomicron clearance (R-HSA-8964026)	5	1	.08	+	12.60	9.02E-02	6.91E-01
NR1H2 & NR1H3 regulate gene expression linked to gluconeogenesis (R-HSA-9632974)	5	1	.08	+	12.60	9.02E-02	6.94E-01
Glyoxylate metabolism and glycine degradation (R-HSA-389661)	31	2	.49	+	4.06	9.37E-02	6.95E-01
Serotonin and melatonin biosynthesis (R-HSA-209931)	5	1	.08	+	12.60	9.02E-02	6.96E-01
Endosomal Sorting Complex Required For Transport (ESCRT) (R-HSA-917729)	31	2	.49	+	4.06	9.37E-02	6.97E-01
Alpha-oxidation of phytanate (R-HSA-389599)	5	1	.08	+	12.60	9.02E-02	6.98E-01
Cristae formation (R-HSA-8949613)	31	2	.49	+	4.06	9.37E-02	6.99E-01
Signal amplification (R-HSA-392518)	31	2	.49	+	4.06	9.37E-02	7.02E-01
Collagen biosynthesis and modifying enzymes (R-HSA-1650814)	67	3	1.06	+	2.82	9.66E-02	7.14E-01
Rev-mediated nuclear export of HIV RNA (R-HSA-165054)	32	2	.51	+	3.94	9.86E-02	7.22E-01
Nucleobase catabolism (R-HSA-8956319)	32	2	.51	+	3.94	9.86E-02	7.24E-01
DNA Repair (R-HSA-73894)	309	1	4.91	-	.20	9.94E-02	7.25E-01
Adherens junctions interactions (R-HSA-418990)	32	2	.51	+	3.94	9.86E-02	7.26E-01
Gene expression (Transcription) (R-HSA-74160)	1451	15	23.04	-	.65	1.00E-01	7.28E-01
Choline catabolism (R-HSA-6798163)	6	1	.10	+	10.50	1.04E-01	7.38E-01
Synthesis of 15-eicosatetraenoic acid derivatives (R-HSA-2142770)	6	1	.10	+	10.50	1.04E-01	7.41E-01
Protein repair (R-HSA-5676934)	6	1	.10	+	10.50	1.04E-01	7.43E-01
Metal sequestration by antimicrobial proteins (R-HSA-6799990)	6	1	.10	+	10.50	1.04E-01	7.45E-01
Signaling by Insulin receptor (R-HSA-74752)	69	3	1.10	+	2.74	1.03E-01	7.47E-01
Methionine salvage pathway (R-HSA-1237112)	6	1	.10	+	10.50	1.04E-01	7.48E-01
Cargo concentration in the ER (R-HSA-5694530)	33	2	.52	+	3.82	1.04E-01	7.48E-01
Proton-coupled monocarboxylate transport (R-HSA-433692)	6	1	.10	+	10.50	1.04E-01	7.50E-01
Phosphorylation of Emi1 (R-HSA-176417)	6	1	.10	+	10.50	1.04E-01	7.52E-01
Factors involved in megakaryocyte development and platelet production (R-HSA-983231)	156	5	2.48	+	2.02	1.09E-01	7.64E-01
Interactions of Rev with host cellular proteins (R-HSA-177243)	34	2	.54	+	3.70	1.09E-01	7.65E-01
ISG15 antiviral mechanism (R-HSA-1169408)	71	3	1.13	+	2.66	1.10E-01	7.67E-01
EML4 and NUDC in mitotic spindle formation (R-HSA-9648025)	113	4	1.79	+	2.23	1.11E-01	7.77E-01
RHO GTPases Activate WASPs and WAVEs (R-HSA-5663213)	35	2	.56	+	3.60	1.14E-01	7.81E-01
trans-Golgi Network Vesicle Budding (R-HSA-199992)	72	3	1.14	+	2.62	1.13E-01	7.83E-01
GPVI-mediated activation cascade (R-HSA-114604)	35	2	.56	+	3.60	1.14E-01	7.84E-01
Costimulation by the CD28 family (R-HSA-388841)	72	3	1.14	+	2.62	1.13E-01	7.86E-01
Detoxification of Reactive Oxygen Species (R-HSA-3299685)	35	2	.56	+	3.60	1.14E-01	7.86E-01
Generic Transcription Pathway (R-HSA-212436)	1196	12	18.99	-	.63	1.19E-01	7.96E-01
Signaling by the B Cell Receptor (BCR) (R-HSA-983705)	171	0	2.72	-	< 0.01	1.19E-01	7.96E-01
NR1H3 & NR1H2 regulate gene expression linked to cholesterol transport and efflux (R-HSA-9029569)	36	2	.57	+	3.50	1.19E-01	7.97E-01
Metabolic disorders of biological oxidation enzymes (R-HSA-5579029)	36	2	.57	+	3.50	1.19E-01	8.00E-01
Modulation by Mtb of host immune system (R-HSA-9637628)	7	1	.11	+	9.00	1.18E-01	8.00E-01
ARMS-mediated activation (R-HSA-170984)	7	1	.11	+	9.00	1.18E-01	8.03E-01
Nef and signal transduction (R-HSA-164944)	7	1	.11	+	9.00	1.18E-01	8.05E-01
Synthesis of 12-eicosatetraenoic acid derivatives (R-HSA-2142712)	7	1	.11	+	9.00	1.18E-01	8.07E-01
HDL assembly (R-HSA-8963896)	7	1	.11	+	9.00	1.18E-01	8.10E-01
Fructose metabolism (R-HSA-5652084)	7	1	.11	+	9.00	1.18E-01	8.12E-01
Post NMDA receptor activation events (R-HSA-438064)	75	3	1.19	+	2.52	1.23E-01	8.19E-01
SLC-mediated transmembrane transport (R-HSA-425407)	248	7	3.94	+	1.78	1.24E-01	8.22E-01
NR1H2 & NR1H3 regulate gene expression linked to lipogenesis (R-HSA-9029558)	8	1	.13	+	7.87	1.32E-01	8.30E-01
Resolution of Sister Chromatid Cohesion (R-HSA-2500257)	121	4	1.92	+	2.08	1.33E-01	8.30E-01
Erythrocytes take up oxygen and release carbon dioxide (R-HSA-1247673)	8	1	.13	+	7.87	1.32E-01	8.32E-01
Biosynthesis of the N-glycan precursor (dolichol lipid-linked oligosaccharide, LLO) and transfer to a nascent protein (R-HSA-446193)	78	3	1.24	+	2.42	1.33E-01	8.33E-01
TRAIL signaling (R-HSA-75158)	8	1	.13	+	7.87	1.32E-01	8.34E-01
Smooth Muscle Contraction (R-HSA-445355)	39	2	.62	+	3.23	1.34E-01	8.34E-01
ECM proteoglycans (R-HSA-3000178)	76	3	1.21	+	2.49	1.26E-01	8.35E-01
Role of ABL in ROBO-SLIT signaling (R-HSA-428890)	8	1	.13	+	7.87	1.32E-01	8.36E-01
DAP12 interactions (R-HSA-2172127)	39	2	.62	+	3.23	1.34E-01	8.37E-01
Fc epsilon receptor (FCERI) signaling (R-HSA-2454202)	189	0	3.00	-	< 0.01	1.27E-01	8.37E-01
The role of GTSE1 in G2/M progression after G2 checkpoint (R-HSA-8852276)	76	3	1.21	+	2.49	1.26E-01	8.37E-01
ROBO receptors bind AKAP5 (R-HSA-9010642)	8	1	.13	+	7.87	1.32E-01	8.39E-01
Mitochondrial Fatty Acid Beta-Oxidation (R-HSA-77289)	38	2	.60	+	3.31	1.29E-01	8.40E-01
Synthesis of PG (R-HSA-1483148)	8	1	.13	+	7.87	1.32E-01	8.41E-01
Metabolism of water-soluble vitamins and cofactors (R-HSA-196849)	120	4	1.91	+	2.10	1.30E-01	8.43E-01
Ovarian tumor domain proteases (R-HSA-5689896)	38	2	.60	+	3.31	1.29E-01	8.43E-01
Fatty Acids bound to GPR40 (FFAR1) regulate insulin secretion (R-HSA-434316)	8	1	.13	+	7.87	1.32E-01	8.43E-01
Platelet Aggregation (Plug Formation) (R-HSA-76009)	38	2	.60	+	3.31	1.29E-01	8.45E-01
Formyl peptide receptors bind formyl peptides and many other ligands (R-HSA-444473)	8	1	.13	+	7.87	1.32E-01	8.46E-01
Molecules associated with elastic fibres (R-HSA-2129379)	38	2	.60	+	3.31	1.29E-01	8.48E-01
Regulation of cytoskeletal remodeling and cell spreading by IPP complex components (R-HSA-446388)	8	1	.13	+	7.87	1.32E-01	8.48E-01
Antiviral mechanism by IFN-stimulated genes (R-HSA-1169410)	79	3	1.25	+	2.39	1.37E-01	8.48E-01
HuR (ELAVL1) binds and stabilizes mRNA (R-HSA-450520)	8	1	.13	+	7.87	1.32E-01	8.51E-01
Defective CHST14 causes EDS, musculocontractural type (R-HSA-3595174)	8	1	.13	+	7.87	1.32E-01	8.53E-01
Transport of fatty acids (R-HSA-804914)	8	1	.13	+	7.87	1.32E-01	8.55E-01
Interferon Signaling (R-HSA-913531)	196	6	3.11	+	1.93	1.39E-01	8.57E-01
TCR signaling (R-HSA-202403)	124	4	1.97	+	2.03	1.41E-01	8.68E-01
Lipophagy (R-HSA-9613354)	9	1	.14	+	7.00	1.46E-01	8.74E-01
Nef Mediated CD4 Down-regulation (R-HSA-167590)	9	1	.14	+	7.00	1.46E-01	8.76E-01
Regulation of commissural axon pathfinding by SLIT and ROBO (R-HSA-428542)	9	1	.14	+	7.00	1.46E-01	8.79E-01
Nef mediated downregulation of MHC class I complex cell surface expression (R-HSA-164940)	9	1	.14	+	7.00	1.46E-01	8.81E-01
CHL1 interactions (R-HSA-447041)	9	1	.14	+	7.00	1.46E-01	8.83E-01
MET receptor recycling (R-HSA-8875656)	9	1	.14	+	7.00	1.46E-01	8.86E-01
RUNX3 regulates p14-ARF (R-HSA-8951936)	9	1	.14	+	7.00	1.46E-01	8.88E-01
InlA-mediated entry of Listeria monocytogenes into host cells (R-HSA-8876493)	9	1	.14	+	7.00	1.46E-01	8.90E-01
Diseases associated with glycosaminoglycan metabolism (R-HSA-3560782)	41	2	.65	+	3.07	1.45E-01	8.91E-01
Axonal growth inhibition (RHOA activation) (R-HSA-193634)	9	1	.14	+	7.00	1.46E-01	8.93E-01
tRNA Aminoacylation (R-HSA-379724)	42	2	.67	+	3.00	1.51E-01	9.00E-01
Transcriptional regulation of white adipocyte differentiation (R-HSA-381340)	83	3	1.32	+	2.28	1.52E-01	9.04E-01
CASP8 activity is inhibited (R-HSA-5218900)	10	1	.16	+	6.30	1.59E-01	9.25E-01
Dimerization of procaspase-8 (R-HSA-69416)	10	1	.16	+	6.30	1.59E-01	9.27E-01
Intra-Golgi traffic (R-HSA-6811438)	43	2	.68	+	2.93	1.56E-01	9.28E-01
MET activates RAP1 and RAC1 (R-HSA-8875555)	10	1	.16	+	6.30	1.59E-01	9.30E-01
Regulation by c-FLIP (R-HSA-3371378)	10	1	.16	+	6.30	1.59E-01	9.32E-01
Organic cation transport (R-HSA-549127)	10	1	.16	+	6.30	1.59E-01	9.34E-01
Abacavir transport and metabolism (R-HSA-2161522)	10	1	.16	+	6.30	1.59E-01	9.37E-01
Reactions specific to the complex N-glycan synthesis pathway (R-HSA-975578)	10	1	.16	+	6.30	1.59E-01	9.39E-01
Acetylcholine regulates insulin secretion (R-HSA-399997)	10	1	.16	+	6.30	1.59E-01	9.42E-01
Transport of bile salts and organic acids, metal ions and amine compounds (R-HSA-425366)	86	3	1.37	+	2.20	1.63E-01	9.44E-01
p75NTR regulates axonogenesis (R-HSA-193697)	10	1	.16	+	6.30	1.59E-01	9.44E-01
Activation of NMDA receptors and postsynaptic events (R-HSA-442755)	87	3	1.38	+	2.17	1.67E-01	9.64E-01
Type I hemidesmosome assembly (R-HSA-446107)	11	1	.17	+	5.73	1.72E-01	9.76E-01
Formation of annular gap junctions (R-HSA-196025)	11	1	.17	+	5.73	1.72E-01	9.79E-01
Transport of organic anions (R-HSA-879518)	11	1	.17	+	5.73	1.72E-01	9.81E-01
CD28 dependent Vav1 pathway (R-HSA-389359)	11	1	.17	+	5.73	1.72E-01	9.84E-01
Frs2-mediated activation (R-HSA-170968)	11	1	.17	+	5.73	1.72E-01	9.86E-01
Dermatan sulfate biosynthesis (R-HSA-2022923)	11	1	.17	+	5.73	1.72E-01	9.89E-01
Pyrimidine catabolism (R-HSA-73621)	11	1	.17	+	5.73	1.72E-01	9.91E-01
PECAM1 interactions (R-HSA-210990)	11	1	.17	+	5.73	1.72E-01	9.94E-01
PI-3K cascade:FGFR1 (R-HSA-5654689)	15	0	.24	-	< 0.01	1.00E00	1.00E00
SHC-mediated cascade:FGFR1 (R-HSA-5654688)	13	0	.21	-	< 0.01	1.00E00	1.00E00
Downstream signaling of activated FGFR1 (R-HSA-5654687)	23	0	.37	-	< 0.01	1.00E00	1.00E00
Uptake and function of diphtheria toxin (R-HSA-5336415)	6	0	.10	-	< 0.01	1.00E00	1.00E00
Mitochondrial translation elongation (R-HSA-5389840)	88	0	1.40	-	< 0.01	6.50E-01	1.00E00
APC truncation mutants have impaired AXIN binding (R-HSA-5467337)	14	0	.22	-	< 0.01	1.00E00	1.00E00
Signaling by TGF-beta Receptor Complex (R-HSA-170834)	72	1	1.14	-	.87	1.00E00	1.00E00
MyD88:MAL(TIRAP) cascade initiated on plasma membrane (R-HSA-166058)	94	0	1.49	-	< 0.01	4.09E-01	1.00E00
APC truncation mutants are not K63 polyubiquitinated (R-HSA-5467333)	1	0	.02	-	< 0.01	1.00E00	1.00E00
Branched-chain amino acid catabolism (R-HSA-70895)	19	1	.30	+	3.31	2.70E-01	1.00E00
Formation of the Editosome (R-HSA-75094)	8	0	.13	-	< 0.01	1.00E00	1.00E00
CDK-mediated phosphorylation and removal of Cdc6 (R-HSA-69017)	71	1	1.13	-	.89	1.00E00	1.00E00
Peptide hormone biosynthesis (R-HSA-209952)	12	0	.19	-	< 0.01	1.00E00	1.00E00
MAP kinase activation (R-HSA-450294)	63	0	1.00	-	< 0.01	6.29E-01	1.00E00
Defective ABCC2 causes Dubin-Johnson syndrome (R-HSA-5679001)	1	0	.02	-	< 0.01	1.00E00	1.00E00
Activated NTRK2 signals through FYN (R-HSA-9032500)	6	0	.10	-	< 0.01	1.00E00	1.00E00
Diseases of Mismatch Repair (MMR) (R-HSA-5423599)	5	0	.08	-	< 0.01	1.00E00	1.00E00
Biosynthesis of aspirin-triggered D-series resolvins (R-HSA-9020265)	2	0	.03	-	< 0.01	1.00E00	1.00E00
Platelet calcium homeostasis (R-HSA-418360)	28	1	.44	+	2.25	3.67E-01	1.00E00
DAG and IP3 signaling (R-HSA-1489509)	40	0	.64	-	< 0.01	1.00E00	1.00E00
Synthesis, secretion, and inactivation of Glucagon-like Peptide-1 (GLP-1) (R-HSA-381771)	20	0	.32	-	< 0.01	1.00E00	1.00E00
Regulation of Glucokinase by Glucokinase Regulatory Protein (R-HSA-170822)	29	0	.46	-	< 0.01	1.00E00	1.00E00
Noncanonical activation of NOTCH3 (R-HSA-9017802)	8	0	.13	-	< 0.01	1.00E00	1.00E00
Intracellular oxygen transport (R-HSA-8981607)	3	0	.05	-	< 0.01	1.00E00	1.00E00
Anchoring fibril formation (R-HSA-2214320)	15	0	.24	-	< 0.01	1.00E00	1.00E00
DNA Replication Pre-Initiation (R-HSA-69002)	84	0	1.33	-	< 0.01	6.44E-01	1.00E00
Free fatty acid receptors (R-HSA-444209)	5	0	.08	-	< 0.01	1.00E00	1.00E00
MAPK targets/ Nuclear events mediated by MAP kinases (R-HSA-450282)	31	0	.49	-	< 0.01	1.00E00	1.00E00
MyD88 deficiency (TLR5) (R-HSA-5602680)	2	0	.03	-	< 0.01	1.00E00	1.00E00
GRB7 events in ERBB2 signaling (R-HSA-1306955)	4	0	.06	-	< 0.01	1.00E00	1.00E00
Transport of Mature mRNA derived from an Intron-Containing Transcript (R-HSA-159236)	71	1	1.13	-	.89	1.00E00	1.00E00
Reduction of cytosolic Ca++ levels (R-HSA-418359)	12	1	.19	+	5.25	1.85E-01	1.00E00
Diseases of Programmed Cell Death (R-HSA-9645723)	1	0	.02	-	< 0.01	1.00E00	1.00E00
Regulated proteolysis of p75NTR (R-HSA-193692)	11	0	.17	-	< 0.01	1.00E00	1.00E00
Transport of Mature mRNAs Derived from Intronless Transcripts (R-HSA-159234)	40	0	.64	-	< 0.01	1.00E00	1.00E00
Defective Intrinsic Pathway for Apoptosis Due to p14ARF Loss of Function (R-HSA-9645722)	1	0	.02	-	< 0.01	1.00E00	1.00E00
Transport of Mature mRNA Derived from an Intronless Transcript (R-HSA-159231)	39	0	.62	-	< 0.01	1.00E00	1.00E00
Transport of the SLBP Dependant Mature mRNA (R-HSA-159230)	33	0	.52	-	< 0.01	1.00E00	1.00E00
Diseases of Immune System (R-HSA-5260271)	24	1	.38	+	2.62	3.26E-01	1.00E00
Severe congenital neutropenia type 4 (G6PC3) (R-HSA-3282872)	1	0	.02	-	< 0.01	1.00E00	1.00E00
Depolymerisation of the Nuclear Lamina (R-HSA-4419969)	13	0	.21	-	< 0.01	1.00E00	1.00E00
Disorders of transmembrane transporters (R-HSA-5619115)	172	4	2.73	+	1.46	3.58E-01	1.00E00
Defective SLC5A7 causes distal hereditary motor neuronopathy 7A (HMN7A) (R-HSA-5619114)	1	0	.02	-	< 0.01	1.00E00	1.00E00
mRNA Editing (R-HSA-75072)	10	0	.16	-	< 0.01	1.00E00	1.00E00
Defective SLC3A1 causes cystinuria (CSNU) (R-HSA-5619113)	2	0	.03	-	< 0.01	1.00E00	1.00E00
Defective SLC20A2 causes idiopathic basal ganglia calcification 1 (IBGC1) (R-HSA-5619111)	1	0	.02	-	< 0.01	1.00E00	1.00E00
Defective SLCO1B1 causes hyperbilirubinemia, Rotor type (HBLRR) (R-HSA-5619110)	1	0	.02	-	< 0.01	1.00E00	1.00E00
HSF1 activation (R-HSA-3371511)	12	0	.19	-	< 0.01	1.00E00	1.00E00
Zinc influx into cells by the SLC39 gene family (R-HSA-442380)	10	0	.16	-	< 0.01	1.00E00	1.00E00
The activation of arylsulfatases (R-HSA-1663150)	13	1	.21	+	4.84	1.98E-01	1.00E00
Transport of the SLBP independent Mature mRNA (R-HSA-159227)	32	0	.51	-	< 0.01	1.00E00	1.00E00
Advanced glycosylation endproduct receptor signaling (R-HSA-879415)	13	1	.21	+	4.84	1.98E-01	1.00E00
Activated NTRK2 signals through CDK5 (R-HSA-9032845)	6	0	.10	-	< 0.01	1.00E00	1.00E00
Ceramide signalling (R-HSA-193681)	3	0	.05	-	< 0.01	1.00E00	1.00E00
Platelet homeostasis (R-HSA-418346)	86	1	1.37	-	.73	1.00E00	1.00E00
Activation of GABAB receptors (R-HSA-991365)	39	1	.62	+	1.61	4.68E-01	1.00E00
Defective SLC6A2 causes orthostatic intolerance (OI) (R-HSA-5619109)	1	0	.02	-	< 0.01	1.00E00	1.00E00
Processing of Capped Intronless Pre-mRNA (R-HSA-75067)	28	0	.44	-	< 0.01	1.00E00	1.00E00
Defective SLC27A4 causes ichthyosis prematurity syndrome (IPS) (R-HSA-5619108)	1	0	.02	-	< 0.01	1.00E00	1.00E00
Defective TPR may confer susceptibility towards thyroid papillary carcinoma (TPC) (R-HSA-5619107)	29	0	.46	-	< 0.01	1.00E00	1.00E00
mRNA Editing: A to I Conversion (R-HSA-75064)	2	0	.03	-	< 0.01	1.00E00	1.00E00
Autointegration results in viral DNA circles (R-HSA-177539)	3	0	.05	-	< 0.01	1.00E00	1.00E00
Negative regulation of TCF-dependent signaling by DVL-interacting proteins (R-HSA-5368598)	5	0	.08	-	< 0.01	1.00E00	1.00E00
Defective SLC12A1 causes Bartter syndrome 1 (BS1) (R-HSA-5619104)	1	0	.02	-	< 0.01	1.00E00	1.00E00
Defective DPM1 causes DPM1-CDG (CDG-1e) (R-HSA-4717374)	3	0	.05	-	< 0.01	1.00E00	1.00E00
SLC transporter disorders (R-HSA-5619102)	96	2	1.52	+	1.31	6.67E-01	1.00E00
Collagen degradation (R-HSA-1442490)	64	1	1.02	-	.98	1.00E00	1.00E00
Inhibition of membrane repair (R-HSA-9635644)	1	0	.02	-	< 0.01	1.00E00	1.00E00
Variant SLC6A20 contributes towards hyperglycinuria (HG) and iminoglycinuria (IG) (R-HSA-5619101)	1	0	.02	-	< 0.01	1.00E00	1.00E00
PAOs oxidise polyamines to amines (R-HSA-141334)	1	0	.02	-	< 0.01	1.00E00	1.00E00
Transfer of LPS from LBP carrier to CD14 (R-HSA-166020)	2	0	.03	-	< 0.01	1.00E00	1.00E00
Biogenic amines are oxidatively deaminated to aldehydes by MAOA and MAOB (R-HSA-141333)	2	0	.03	-	< 0.01	1.00E00	1.00E00
Processing of Intronless Pre-mRNAs (R-HSA-77595)	19	0	.30	-	< 0.01	1.00E00	1.00E00
WNT ligand biogenesis and trafficking (R-HSA-3238698)	26	0	.41	-	< 0.01	1.00E00	1.00E00
N-Glycan antennae elongation (R-HSA-975577)	15	1	.24	+	4.20	2.23E-01	1.00E00
Negative regulation of NMDA receptor-mediated neuronal transmission (R-HSA-9617324)	21	0	.33	-	< 0.01	1.00E00	1.00E00
Reactions specific to the hybrid N-glycan synthesis pathway (R-HSA-975574)	1	0	.02	-	< 0.01	1.00E00	1.00E00
p75NTR negatively regulates cell cycle via SC1 (R-HSA-193670)	6	0	.10	-	< 0.01	1.00E00	1.00E00
HIV Infection (R-HSA-162906)	227	6	3.60	+	1.66	1.84E-01	1.00E00
Defective SLC34A2 causes pulmonary alveolar microlithiasis (PALM) (R-HSA-5687583)	1	0	.02	-	< 0.01	1.00E00	1.00E00
Vasopressin-like receptors (R-HSA-388479)	6	0	.10	-	< 0.01	1.00E00	1.00E00
TAK1 activates NFkB by phosphorylation and activation of IKKs complex (R-HSA-445989)	32	0	.51	-	< 0.01	1.00E00	1.00E00
Toll Like Receptor 4 (TLR4) Cascade (R-HSA-166016)	126	2	2.00	-	1.00	1.00E00	1.00E00
SLBP Dependent Processing of Replication-Dependent Histone Pre-mRNAs (R-HSA-77588)	11	0	.17	-	< 0.01	1.00E00	1.00E00
Pervasive developmental disorders (R-HSA-9005895)	11	0	.17	-	< 0.01	1.00E00	1.00E00
MET activates PTPN11 (R-HSA-8865999)	4	0	.06	-	< 0.01	1.00E00	1.00E00
Loss of function of MECP2 in Rett syndrome (R-HSA-9005891)	11	0	.17	-	< 0.01	1.00E00	1.00E00
Opsins (R-HSA-419771)	9	0	.14	-	< 0.01	1.00E00	1.00E00
Transcriptional regulation of granulopoiesis (R-HSA-9616222)	58	0	.92	-	< 0.01	1.00E00	1.00E00
RNA polymerase II transcribes snRNA genes (R-HSA-6807505)	74	0	1.17	-	< 0.01	6.33E-01	1.00E00
Lysosphingolipid and LPA receptors (R-HSA-419408)	13	0	.21	-	< 0.01	1.00E00	1.00E00
FLT3 Signaling (R-HSA-9607240)	250	5	3.97	+	1.26	6.04E-01	1.00E00
Toll-like Receptor Cascades (R-HSA-168898)	152	3	2.41	+	1.24	5.24E-01	1.00E00
Antimicrobial peptides (R-HSA-6803157)	91	2	1.44	+	1.38	6.58E-01	1.00E00
Sodium-coupled phosphate cotransporters (R-HSA-427652)	5	0	.08	-	< 0.01	1.00E00	1.00E00
Lysosomal oligosaccharide catabolism (R-HSA-8853383)	4	0	.06	-	< 0.01	1.00E00	1.00E00
Activation of kainate receptors upon glutamate binding (R-HSA-451326)	30	0	.48	-	< 0.01	1.00E00	1.00E00
G-protein beta:gamma signalling (R-HSA-397795)	32	0	.51	-	< 0.01	1.00E00	1.00E00
Chk1/Chk2(Cds1) mediated inactivation of Cyclin B:Cdk1 complex (R-HSA-75035)	13	1	.21	+	4.84	1.98E-01	1.00E00
RORA activates gene expression (R-HSA-1368082)	18	0	.29	-	< 0.01	1.00E00	1.00E00
Lactose synthesis (R-HSA-5653890)	3	0	.05	-	< 0.01	1.00E00	1.00E00
ATF4 activates genes in response to endoplasmic reticulum stress (R-HSA-380994)	27	0	.43	-	< 0.01	1.00E00	1.00E00
Retrograde neurotrophin signalling (R-HSA-177504)	14	0	.22	-	< 0.01	1.00E00	1.00E00
IKBKB deficiency causes SCID (R-HSA-5602636)	3	0	.05	-	< 0.01	1.00E00	1.00E00
The IPAF inflammasome (R-HSA-844623)	2	0	.03	-	< 0.01	1.00E00	1.00E00
NRAGE signals death through JNK (R-HSA-193648)	59	0	.94	-	< 0.01	1.00E00	1.00E00
Defective Mismatch Repair Associated With MLH1 (R-HSA-5545483)	2	0	.03	-	< 0.01	1.00E00	1.00E00
Regulation of localization of FOXO transcription factors (R-HSA-9614399)	12	1	.19	+	5.25	1.85E-01	1.00E00
Phosphorylation of the APC/C (R-HSA-176412)	19	0	.30	-	< 0.01	1.00E00	1.00E00
Hyaluronan biosynthesis and export (R-HSA-2142850)	5	0	.08	-	< 0.01	1.00E00	1.00E00
Synthesis of diphthamide-EEF2 (R-HSA-5358493)	8	0	.13	-	< 0.01	1.00E00	1.00E00
DNA Replication (R-HSA-69306)	126	2	2.00	-	1.00	1.00E00	1.00E00
Interleukin-33 signaling (R-HSA-9014843)	2	0	.03	-	< 0.01	1.00E00	1.00E00
Downregulation of ERBB2 signaling (R-HSA-8863795)	27	0	.43	-	< 0.01	1.00E00	1.00E00
NR1D1 (REV-ERBA) represses gene expression (R-HSA-1368071)	3	0	.05	-	< 0.01	1.00E00	1.00E00
CRMPs in Sema3A signaling (R-HSA-399956)	16	1	.25	+	3.94	2.35E-01	1.00E00
SEMA3A-Plexin repulsion signaling by inhibiting Integrin adhesion (R-HSA-399955)	14	0	.22	-	< 0.01	1.00E00	1.00E00
Sema3A PAK dependent Axon repulsion (R-HSA-399954)	16	0	.25	-	< 0.01	1.00E00	1.00E00
The AIM2 inflammasome (R-HSA-844615)	3	0	.05	-	< 0.01	1.00E00	1.00E00
BDNF activates NTRK2 (TRKB) signaling (R-HSA-9024909)	2	0	.03	-	< 0.01	1.00E00	1.00E00
p75NTR signals via NF-kB (R-HSA-193639)	16	1	.25	+	3.94	2.35E-01	1.00E00
APC/C:Cdc20 mediated degradation of mitotic proteins (R-HSA-176409)	74	0	1.17	-	< 0.01	6.33E-01	1.00E00
Regulation of APC/C activators between G1/S and early anaphase (R-HSA-176408)	79	1	1.25	-	.80	1.00E00	1.00E00
Variant SLC6A20 contributes towards hyperglycinuria (HG) and iminoglycinuria (IG) (R-HSA-5660686)	1	0	.02	-	< 0.01	1.00E00	1.00E00
RUNX2 regulates chondrocyte maturation (R-HSA-8941284)	4	0	.06	-	< 0.01	1.00E00	1.00E00
Conversion from APC/C:Cdc20 to APC/C:Cdh1 in late anaphase (R-HSA-176407)	19	1	.30	+	3.31	2.70E-01	1.00E00
FGFR2b ligand binding and activation (R-HSA-190377)	9	0	.14	-	< 0.01	1.00E00	1.00E00
FGFR2c ligand binding and activation (R-HSA-190375)	9	0	.14	-	< 0.01	1.00E00	1.00E00
Hyaluronan metabolism (R-HSA-2142845)	17	0	.27	-	< 0.01	1.00E00	1.00E00
G alpha (12/13) signalling events (R-HSA-416482)	80	0	1.27	-	< 0.01	6.39E-01	1.00E00
FGFR1c and Klotho ligand binding and activation (R-HSA-190374)	1	0	.02	-	< 0.01	1.00E00	1.00E00
FGFR1c ligand binding and activation (R-HSA-190373)	8	0	.13	-	< 0.01	1.00E00	1.00E00
Mineralocorticoid biosynthesis (R-HSA-193993)	6	0	.10	-	< 0.01	1.00E00	1.00E00
FGFR3c ligand binding and activation (R-HSA-190372)	9	0	.14	-	< 0.01	1.00E00	1.00E00
FGFR3b ligand binding and activation (R-HSA-190371)	4	0	.06	-	< 0.01	1.00E00	1.00E00
FGFR1b ligand binding and activation (R-HSA-190370)	5	0	.08	-	< 0.01	1.00E00	1.00E00
Beta-oxidation of pristanoyl-CoA (R-HSA-389887)	8	0	.13	-	< 0.01	1.00E00	1.00E00
Signaling by NODAL (R-HSA-1181150)	21	0	.33	-	< 0.01	1.00E00	1.00E00
Interleukin-2 signaling (R-HSA-9020558)	12	1	.19	+	5.25	1.85E-01	1.00E00
Activation of Ca-permeable Kainate Receptor (R-HSA-451308)	10	0	.16	-	< 0.01	1.00E00	1.00E00
Activation of Na-permeable kainate receptors (R-HSA-451307)	2	0	.03	-	< 0.01	1.00E00	1.00E00
Ionotropic activity of kainate receptors (R-HSA-451306)	10	0	.16	-	< 0.01	1.00E00	1.00E00
Downregulation of ERBB4 signaling (R-HSA-1253288)	8	0	.13	-	< 0.01	1.00E00	1.00E00
Breakdown of the nuclear lamina (R-HSA-352238)	2	0	.03	-	< 0.01	1.00E00	1.00E00
Serotonin clearance from the synaptic cleft (R-HSA-380615)	3	0	.05	-	< 0.01	1.00E00	1.00E00
Evasion of Oxidative Stress Induced Senescence Due to Defective p16INK4A binding to CDK4 (R-HSA-9632697)	2	0	.03	-	< 0.01	1.00E00	1.00E00
Cyclin A:Cdk2-associated events at S phase entry (R-HSA-69656)	84	2	1.33	+	1.50	3.90E-01	1.00E00
Metabolism of serotonin (R-HSA-380612)	2	0	.03	-	< 0.01	1.00E00	1.00E00
Erythropoietin activates RAS (R-HSA-9027284)	12	0	.19	-	< 0.01	1.00E00	1.00E00
Amino acid transport across the plasma membrane (R-HSA-352230)	32	0	.51	-	< 0.01	1.00E00	1.00E00
Erythropoietin activates STAT5 (R-HSA-9027283)	7	0	.11	-	< 0.01	1.00E00	1.00E00
Energy dependent regulation of mTOR by LKB1-AMPK (R-HSA-380972)	29	1	.46	+	2.17	3.77E-01	1.00E00
Regulation of RUNX2 expression and activity (R-HSA-8939902)	70	0	1.11	-	< 0.01	6.30E-01	1.00E00
Evasion of Oxidative Stress Induced Senescence Due to p16INK4A Defects (R-HSA-9632693)	3	0	.05	-	< 0.01	1.00E00	1.00E00
G alpha (q) signalling events (R-HSA-416476)	214	2	3.40	-	.59	7.78E-01	1.00E00
Agmatine biosynthesis (R-HSA-351143)	2	0	.03	-	< 0.01	1.00E00	1.00E00
Mitotic Metaphase and Anaphase (R-HSA-2555396)	193	4	3.06	+	1.31	5.55E-01	1.00E00
Highly calcium permeable nicotinic acetylcholine receptors (R-HSA-629597)	9	0	.14	-	< 0.01	1.00E00	1.00E00
Highly calcium permeable postsynaptic nicotinic acetylcholine receptors (R-HSA-629594)	11	0	.17	-	< 0.01	1.00E00	1.00E00
CTLA4 inhibitory signaling (R-HSA-389513)	20	1	.32	+	3.15	2.82E-01	1.00E00
PIWI-interacting RNA (piRNA) biogenesis (R-HSA-5601884)	29	0	.46	-	< 0.01	1.00E00	1.00E00
Notch-HLH transcription pathway (R-HSA-350054)	28	0	.44	-	< 0.01	1.00E00	1.00E00
Signaling by TGF-beta family members (R-HSA-9006936)	101	1	1.60	-	.62	1.00E00	1.00E00
ERBB2 Activates PTK6 Signaling (R-HSA-8847993)	11	0	.17	-	< 0.01	1.00E00	1.00E00
Interleukin-36 pathway (R-HSA-9014826)	6	0	.10	-	< 0.01	1.00E00	1.00E00
BBSome-mediated cargo-targeting to cilium (R-HSA-5620922)	23	1	.37	+	2.74	3.15E-01	1.00E00
Cargo trafficking to the periciliary membrane (R-HSA-5620920)	51	1	.81	+	1.23	5.60E-01	1.00E00
[truncated: 1,714 more rows]
